# Supplementary material for: Mercury fluxes from hydrothermal venting at mid-ocean ridges constrained by measurements
Source: Springer Nature journal article supplement (doi:10.1038/s41561-023-01341-w), 2023-12-12
Supplement: MOESM2 [file 41561_2023_1341_MOESM2_ESM.xlsx]

## Sheet: Sheet1
km	Station	Depth_m	Latitude	Longitude	Nephel_ntu	tHg_pM	dMn_nM	pMn_nM	dFe_nM	pFe_nM	MeHg_pM
300	1	3172.56	23.2577	-44.3755	0.019	1.175	0.287922	0.0868753	1.99004	1.22736	0.215223
300	1	3172.02	23.2571	-44.3751			0.373202		1.4841		0.34833
300	1	3149.09	23.2571	-44.3751
300	1	3123.32	23.2571	-44.3751
300	1	3093.96	23.2571	-44.3751	0.017	0.62	0.217812	0.0751392	1.21913	0.750026	0.302725
300	1	3064.73	23.2571	-44.3751	0.017	0.65	0.01066	0.0784561	0.13038	0.598807	0.232097
300	1	3039.22	23.2571	-44.3751	0.018	0.63	0.311702	0.0513517	1.26751	0.518603	0.302573
300	1	3025.44	23.2571	-44.3751	0.018	0.65		0.0616805		1.02842	0.314334
300	1	2999.41	23.2571	-44.3751	0.018	0.56	0.841525	0.0578907	2.36549	0.70066	0.250534
300	1	2804.64	23.2571	-44.3751		0.53					0.195121
300	1	2604.3	23.2571	-44.3751	0.017	0.45	0.212482	0.0639855	1.12166	0.50248	0.252154
300	1	2403.48	23.2571	-44.3751	0.018	0.62	0.21689	0.0290225	0.924755	0.258141	0.422417
300	1	2202.88	23.2571	-44.3751	0.018	0.68	0.167075	0.0418471	0.906817	0.369645	0.29691
300	1	2003.94	23.2571	-44.3751		0.36	0.209305		0.985435		0.327068
300	1	1652.27	23.2571	-44.3751
300	1	1302.18	23.2571	-44.3751	0.017	1.02	0.155185	0.0556299	0.776847	0.681887	0.344436
300	1	950.542	23.2571	-44.3751	0.019		0.018655	0.0194964	0.228882	0.273465	0.435277
300	1	420.762	23.2571	-44.3751	0.024	0.77	0.162462	0.0676162	0.923422	0.646761	0.0579532
300	1	200.3	23.2571	-44.3751	0.039		0.37761	0.133793	1.1151	0.316993	0.0504183
300	1	150.293	23.2571	-44.3751	0.051		0.0090405	0.0752141	0.153237	0.255071	0.0226627
300	1	99.705	23.2571	-44.3751	0.046		1.47046	0.0742751	1.64041	0.905707	0.0273425
300	1	30.053	23.2571	-44.3751			1.43008		1.15036		0.0188833
300	1	29.752	23.2571	-44.3751	0.047	0.51	1.51925	0.00288978	1.47231	0.00957029	0.0181196
300	1	10	23.2571	-44.3751
75	2	3743.29	25.56	-45.2196			0.26076		1.07943		0.106756
75	2	3740.45	25.56	-45.2196	0.015	0.685	0.245385	0.0606002	0.97129	0.701187	0.198303
75	2	3605.51	25.56	-45.2196	0.014	0.68	0.248152	0.0414206	1.11192	0.456313	0.255427
75	2	3555.84	25.56	-45.2196	0.013	1.07	0.313547	0.0631993	1.69197	1.06328	0.228166
75	2	3505.62	25.56	-45.2196	0.013	0.67	0.23862	0.0885397	0.960937	0.648772	0.173765
75	2	3455.86	25.56	-45.2196	0.014	0.82	0.24805	0.0476016	0.945767	0.464567	0.18087
75	2	3455.77	25.56	-45.2196			0.242412		0.944742		0.19072
75	2	3405.61	25.56	-45.2196	0.014	0.67	0.301555	0.0534727	1.59859	0.514594	0.229675
75	2	3354.57	25.56	-45.2196	0.013	0.53	0.440135	0.00830426	1.08055	0.169068	0.296161
75	2	3351.36	25.56	-45.2196	0.013	1.24	0.0931725	0.0371174	0.611208	0.433435	0.241473
75	2	3303.43	25.56	-45.2196	0.013	0.98	0.276647	0.0567033	1.0332	0.557197	0.265062
75	2	3254.68	25.56	-45.2196	0.014	0.61	0.287205	0.0440661	1.06805	0.455797	0.230086
75	2	3204.98	25.56	-45.2196	0.014	0.62	0.00443825	0.0560662	0.111315	0.582738	0.279276
75	2	3005.11	25.56	-45.2196		0.91					0.253734
75	2	2503.79	25.56	-45.2196	0.011	0.99	0.00271625	0.00553416	0.0970675	0.0805331	0.26672
75	2	2002.81	25.56	-45.2196	0.013	0.58	0.209202	0.0360653	0.928547	0.334816	0.250974
75	2	1502.89	25.56	-45.2196	0.012	0.42	0.151187	0.0321549	0.696385	0.372963	0.241536
75	2	1253.15	25.56	-45.2196	0.013	0.47	0.149547	0.029521	0.738922	0.411897	0.25045
75	2	1001.82	25.56	-45.2196	0.015	0.47	0.14719	0.0337137	0.74251	0.322964	0.257455
75	2	801.242	25.56	-45.2196	0.016	0.69		0.0495659		0.458895	0.317609
75	2	601.579	25.56	-45.2196	0.019	0.49	0.04797	0.0465697	0.390423	0.34455	0.189698
75	2	400.807	25.56	-45.2196		0.65	0.162155		0.507682		0.058382
75	2	100.541	25.56	-45.2196	0.052	0.58	0.00136325	0.0324334	0.401492	0.452752	0.0250943
75	2	30.677	25.56	-45.2196	0.05	0.63	0.00164	0.0125198	0.58671	0.782778	0.00973801
0	3	3626.31	26.1372	-44.8261	0.019	0.565	1.03791	0.0724179	6.18659	1.17742	0.272426
0	3	3626.14	26.1372	-44.8261			0.0400775		1.60658
0	3	3605.38	26.1372	-44.8261	0.248	2.03	72.9961	0.064828	32.8637	405.058	0.251336
0	3	3579.72	26.1372	-44.8261	0.19	0.61	0.147087	0.0425821	1.87595	0.55764	0.225322
0	3	3554.98	26.1372	-44.8261	0.025	0.62	10.0699	0.0552692	32.6473	18.4592	0.269868
0	3	3529.81	26.1372	-44.8261	0.027	0.61	12.8662	0.055975	34.3845	29.0211	0.288105
0	3	3505.36	26.1372	-44.8261	0.029	0.86	14.6377	0.0569612	33.7974	36.9217	0.255241
0	3	3480.26	26.1372	-44.8261	0.029	0.7	15.0525	0.117459	33.1397	83.2673	0.250569
0	3	3455.32	26.1372	-44.8261	0.033	0.76	19.2012	0.0661218	34.6665	53.6093	0.25791
0	3	3404.72	26.1372	-44.8261	0.038	0.71	22.2686	0.0540852	25.5721	71.4888	0.259441
0	3	3354.36	26.1372	-44.8261	0.041	0.55	27.5815	0.0485163	37.0799	76.9014	0.25935
0	3	3304.58	26.1372	-44.8261	0.041	0.84	28.7504	0.0845559	21.666	152.359	0.251208
0	3	3254.83	26.1372	-44.8261	0.044	0.81	27.3249	0.0496235	22.3839	82.9865	0.192568
0	3	3204.17	26.1372	-44.8261	0.044	1.29	36.4998	0.0559153	52.3721	102.941	0.205588
0	3	3154.45	26.1372	-44.8261	0.026	0.71	5.32754	0.0642721	15.1525	15.0032	0.210062
0	3	3104.33	26.1372	-44.8261			1.01885		6.1502
0	3	3052.7	26.1372	-44.8261	0.018	0.97	0.471602	0.04519	2.77703	1.45422	0.223575
0	3	3005.02	26.1372	-44.8261	0.019	0.99	0.330152	0.0528283	2.46195	1.2512	0.240174
0	3	2803.81	26.1372	-44.8261	0.019	0.81	0.166357	0.0556849	1.54631	0.461781	0.102919
0	3	2252.14	26.1372	-44.8261	0.02	0.63	0.187062	0.0467729	1.24701	0.406844	0.25605
0	3	1251.49	26.1372	-44.8261	0.018	0.48	0.157952	0.047393	1.15292	0.435538
0	3	898.246	26.1372	-44.8261	0.023	0.5	0.12956	0.053552	0.940745	0.625	0.254971
0	3	451.074	26.1372	-44.8261	0.023	0.59		0.139505		0.606478	0.0919087
0	3	29.824	26.1372	-44.8261	0.051	0.77	1.45386	0.0194486	0.757065	0.867802	0.0240543
0.5	4	3657.05	26.1333	-44.8284	0.019	0.72	0.234212	0.0661812	1.33834	0.937282	0.282315
0.5	4	3657	26.1333	-44.8284			1.2424		2.64511		0.272437
0.5	4	3605.79	26.1333	-44.8284	0.02	0.63	0.566517	0.100057	2.63937	1.26658	0.286687
0.5	4	3555.45	26.1333	-44.8284	0.022	1.59	2.52601	0.065877	7.95072	5.10516	0.276426
0.5	4	3505.39	26.1333	-44.8284	0.058	0.75	18.2027	0.0856518	19.0727	78.6028	0.275556
0.5	4	3457.04	26.1333	-44.8284			24.7436		19.6196
0.5	4	3456.67	26.1333	-44.8284	0.066	0.86	25.7213	0.0646681	28.0317	90.8893
0.5	4	3405.71	26.1333	-44.8284	0.072	0.77	27.3779	0.0752961	23.8654	103.724	0.256639
0.5	4	3355.25	26.1333	-44.8284	0.078	0.73		0.0743248			0.226644
0.5	4	3354.67	26.1333	-44.8284	0.078	0.58	37.1786	0.0654416	19.279	136.367	0.269989
0.5	4	3305.45	26.1333	-44.8284	0.065	0.63	22.7982	0.080635	22.8825	86.7857	0.254434
0.5	4	3255.44	26.1333	-44.8284	0.039	0.8	13.6895	0.0746748	20.6449	49.8248	0.269625
0.5	4	3205.4	26.1333	-44.8284			10.2988		19.2619		0.497406
0.5	4	3205.05	26.1333	-44.8284	0.035	0.665	5.65185	0.0749446	10.768	17.2495	0.253727
0.5	4	3155.34	26.1333	-44.8284	0.021	0.6	2.27017	0.0739125	6.05201	6.46131
0.5	4	3155.13	26.1333	-44.8284			12.4826		15.2038		0.280007
0.5	4	3104.89	26.1333	-44.8284	0.02	0.58	1.26762	0.057868	3.56013	4.23715
0.5	4	2500.75	26.1333	-44.8284	0.02	0.68	0.222322	0.0527839	1.17147	0.746343
0.5	4	1252.29	26.1333	-44.8284	0.018	0.37	0.139502	0.0460024	0.948842	0.482
0.5	4	1002.4	26.1333	-44.8284	0.027	0.37	0.140425	0.0496668	1.22375	0.533855
0.5	4	751.776	26.1333	-44.8284	0.021	0.44	0.134685	0.0677274	0.796835	0.4997	0.377805
0.5	4	220.806	26.1333	-44.8284	0.031	0.49	0.160617	0.063755	0.71709	0.525342
0.5	4	129.365	26.1333	-44.8284	0.046	0.57	1.07307	0.0278961	0.805445	0.181557	0.0588478
0.5	4	30.579	26.1333	-44.8284	0.052	0.62	1.67218	0.00392403	14.6783	0.284078
1	5	3687.07	26.1291	-44.8305	0.018	0.955	0.192905	0.0655581	1.15148	0.919892
1	5	3686.58	26.1291	-44.8305			0.321235		1.43326		0.569535
1	5	3653.33	26.1291	-44.8305	0.019	0.7	0.202745	0.0677548	1.11735	0.984074	0.25074
1	5	3605.92	26.1291	-44.8305	0.019	0.865	0.429885	0.0633113	2.25326	1.02677	0.264359
1	5	3605.66	26.1291	-44.8305			0.34399		1.91531
1	5	3555.63	26.1291	-44.8305	0.023	0.6	4.58749	0.0651094	15.3427	9.13863
1	5	3506.2	26.1291	-44.8305	0.03	0.68	8.18975	0.0662116	21.7252	19.8841	0.544226
1	5	3455.36	26.1291	-44.8305	0.049	1.01	25.2211	0.0554319	25.9424	74.7548	0.259447
1	5	3404.81	26.1291	-44.8305	0.056	0.69	29.6461	0.0863069	33.1067	116.317	0.260881
1	5	3404.1	26.1291	-44.8305			30.0108		29.0985		0.250519
1	5	3355.95	26.1291	-44.8305	0.047	0.83	25.9368	0.0610172	28.1211	80.7081	0.250509
1	5	3305.19	26.1291	-44.8305	0.063	0.935	23.9164	0.0645697	12.2067	85.8901	0.250736
1	5	3304.63	26.1291	-44.8305			21.928		14.7628
1	5	3255.93	26.1291	-44.8305	0.069	0.72	29.5972	0.0619336	15.1983	121.416	0.281168
1	5	3204.55	26.1291	-44.8305			16.8733		14.462		0.271813
1	5	3202.98	26.1291	-44.8305	0.05	0.755	2.26064	0.0608889	6.28745	66.8759
1	5	3155.38	26.1291	-44.8305	0.02	0.51	1.76033	0.072005	4.73027	5.2469	0.258843
1	5	3008.39	26.1291	-44.8305	0.021	0.54	0.831172	0.0637174	3.17955	3.40814	0.223513
1	5	2504.15	26.1291	-44.8305	0.018	0.51	0.245077	0.0258858	1.12555	0.318056	0.282241
1	5	1252.46	26.1291	-44.8305	0.019	0.57	0.151495	0.043833	0.752657	0.380317
1	5	1002.62	26.1291	-44.8305	0.021	0.79	0.00130175	0.0389389	0.755835	35.7343	0.291718
1	5	501.442	26.1291	-44.8305	0.023	0.66	0.174045	0.0972799	0.714322	0.445856	0.0724988
1	5	120.919	26.1291	-44.8305	0.053	0.7	1.43223	0.0324536	0.89421	0.142886	0.028605
1	5	30.495	26.1291	-44.8305	0.049	0.57	1.53227	0.0166978	0.714527	1.17588
0.5	6	3673.91	26.1392	-44.8304	0.021	0.7	0.184705	0.146108	1.26065	2.49822
0.5	6	3673.82	26.1392	-44.8304			0.19352		1.10003		0.535224
0.5	6	3655.83	26.1392	-44.8304	0.018	0.57	0.191265	0.0745322	1.08148	0.988251	0.339954
0.5	6	3606.24	26.1392	-44.8304	0.021	0.65	0.256865	0.0584614	1.37627	0.767659	0.270007
0.5	6	3555.69	26.1392	-44.8304	0.02	0.65	0.733182	0.0596168	4.81483	0.780766	0.321224
0.5	6	3505.81	26.1392	-44.8304	0.023	0.48	2.05031	0.0727792	7.65644	3.52784	0.335093
0.5	6	3455.49	26.1392	-44.8304		0.79	16.2549		33.0487		0.361504
0.5	6	3454.89	26.1392	-44.8304			16.2679		30.5673
0.5	6	3405.86	26.1392	-44.8304	0.043	0.65	24.1767	0.0581715	25.0538	87.9604	0.57119
0.5	6	3356.03	26.1392	-44.8304	0.061	0.95	23.968	0.0543415	20.2454	76.212	0.376138
0.5	6	3356	26.1392	-44.8304			21.4523		21.8429		0.345942
0.5	6	3305.41	26.1392	-44.8304	0.081	0.63	35.0526	0.0645435	15.2795	143.762	0.53429
0.5	6	3254.87	26.1392	-44.8304	0.072	1.02	27.7627	0.0525198	17.3357	97.5281	0.357792
0.5	6	3254.26	26.1392	-44.8304			28.6494		17.7401
0.5	6	3205.45	26.1392	-44.8304	0.061	0.82	24.105	0.0684828	18.4915	79.0454
0.5	6	3155.65	26.1392	-44.8304	0.028	0.47	6.27925	0.0740034	11.7304	20.2683	0.349343
0.5	6	3104.18	26.1392	-44.8304	0.034	0.59	8.50422	0.0595479	13.6902	27.926	0.357195
0.5	6	3005.76	26.1392	-44.8304	0.021	0.81	0.64206	0.0513608	2.88056	2.07553	0.412096
0.5	6	2504.39	26.1392	-44.8304	0.019	0.52	0.212585	0.0466904	1.10003	0.505324
0.5	6	1252.54	26.1392	-44.8304	0.017	0.44	0.176608	0.0419371	1.67229	0.370637	0.366698
0.5	6	1002.12	26.1392	-44.8304	0.018	0.59	0.13284	0.0526237	0.85034	0.503973	0.449655
0.5	6	451.003	26.1392	-44.8304	0.022	0.5	0.177017	0.108038	0.661432	0.353114	0.127488
0.5	6	151.027	26.1392	-44.8304	0.048	0.44	1.26464	0.030248	0.906817	0.114461	0.0532726
0.5	6	30.029	26.1392	-44.8304	0.051	0.5	1.30667	0.0151751	0.786687	1.09331	0.038741
2	7	3865.82	26.1214	-44.8353	0.018	0.6	0.166665	0.0622165	1.05636	0.768564	0.320443
2	7	3805.87	26.1214	-44.8353	0.019	0.54	0.36326	0.0521894	1.14677	1.37684	0.397407
2	7	3604.76	26.1214	-44.8353	0.018	0.48	0.19598	0.0823536	1.56169	1.13296	0.282834
2	7	3455.61	26.1214	-44.8353	0.019	1.09		0.090078		5.24307	0.315243
2	7	3380.95	26.1214	-44.8353		0.6	1.92649		2.90557		0.433059
2	7	3355.37	26.1214	-44.8353	0.024	0.81	5.19388	0.0733748	20.9659	21.3394	0.350246
2	7	3354.83	26.1214	-44.8353			5.27219		4.48847		0.347446
2	7	3330.68	26.1214	-44.8353	0.027	0.71	9.37619	0.0716593	25.9037	26.3624	0.365636
2	7	3305.66	26.1214	-44.8353			9.37619		8.01704		0.354154
2	7	3305.37	26.1214	-44.8353	0.025	0.79	40.8934	0.0723252	7.95144	41.6131	0.480704
2	7	3280.76	26.1214	-44.8353	0.022	1.1	2.33423	0.0587303	3.10472	9.37375	0.522871
2	7	3255.36	26.1214	-44.8353	0.02		1.70652	0.0581948	2.63117	5.37213
2	7	3205.15	26.1214	-44.8353	0.021	1.075	1.82245	0.0492324	3.54875	4.67736
2	7	3204.88	26.1214	-44.8353			1.68828		3.48408		0.519305
2	7	3104.8	26.1214	-44.8353	0.021	0.51	1.23318	0.0625575	3.01637	4.05515
2	7	3005.45	26.1214	-44.8353	0.021	0.65	0.825022	0.0554676	3.87286	3.33663
2	7	2904.12	26.1214	-44.8353	0.018	0.58	0.412767	0.0483657	2.27806	1.3844	0.265936
2	7	2804.33	26.1214	-44.8353	0.019	0.6	0.21566	0.0382103	0.849622	0.416115	0.336876
2	7	2653.7	26.1214	-44.8353	0.017	0.53	0.174045	0.0305176	0.702125	0.277923
2	7	1252.46	26.1214	-44.8353	0.019	0.73	0.14924	0.0361562	0.670247	0.370519	0.299126
2	7	1002	26.1214	-44.8353	0.019	0.4	0.143397	0.0286975	0.694642	0.326898	0.359395
2	7	250.971	26.1214	-44.8353	0.025	0.5	0.270292	0.0835519	0.470885	0.342348	0.0591783
2	7	109.444	26.1214	-44.8353	0.043	0.56	1.39666	0.0173685	0.61336	0.0837272	0.0402735
2	7	30.695	26.1214	-44.8353	0.05	0.5	1.47569	0.0205877	0.62443	1.37023	0.035056
5	8	3979.05	26.098	-44.8489	0.167	0.35	0.342145	0.329958	1.33045	3.59381
5	8	3905.5	26.098	-44.8489	0.018	0.5	0.474882	0.0542202	1.3079	1.25882
5	8	3705.01	26.098	-44.8489	0.019	0.58	0.309755	0.0686752	1.02582	1.03011	0.117625
5	8	3505.88	26.098	-44.8489	0.018	1.49	0.485747	0.0766823	1.3163	1.21499	0.139997
5	8	3405.73	26.098	-44.8489	0.021	0.59	0.534127	0.0630339	1.26905	1.46908	0.175575
5	8	3380.19	26.098	-44.8489	0.019	0.49	0.422812	0.0699302	1.34695	1.96639	0.250666
5	8	3355.55	26.098	-44.8489	0.02	0.5	0.796425	0.0652258	1.82368	2.50672	0.272633
5	8	3352.9	26.098	-44.8489			0.768955		1.70293		0.232789
5	8	3330.53	26.098	-44.8489	0.021	0.5	3.11456	0.0610033	3.68426	11.131	0.120353
5	8	3305.69	26.098	-44.8489	0.022	0.555	3.60206	0.080226			0.249284
5	8	3305.6	26.098	-44.8489
5	8	3280	26.098	-44.8489	0.025	0.73	3.74679	0.0583396	4.06679	12.0309
5	8	3255.64	26.098	-44.8489	0.021	0.51	3.32674	0.0599805	4.09006	11.6846	0.25684
5	8	3249.25	26.098	-44.8489			3.70968		5.166		0.236702
5	8	3230.39	26.098	-44.8489	0.021	0.55	2.3123	0.069788	3.85195	7.67117
5	8	3205.02	26.098	-44.8489	0.02	0.51	1.42465	0.0745189	2.82982	3.70266	0.252901
5	8	3105	26.098	-44.8489	0.019	0.66	1.24435	0.0742508	3.27887	3.92808	0.190938
5	8	2955.11	26.098	-44.8489	0.019	0.81	0.913377	0.0531516	3.1408	2.38201	0.201909
5	8	2804.59	26.098	-44.8489	0.018	0.46	0.530335	0.036172	1.76044	1.03466
5	8	2603.82	26.098	-44.8489	0.018	0.54	0.160105	0.0490295	0.911225	0.402605	0.126524
5	8	1252.54	26.098	-44.8489	0.017	0.45	0.155697	0.0351612	0.71176	0.329348	0.294242
5	8	1001.71	26.098	-44.8489	0.018	0.52	0.141655	0.0600561	0.662457	0.607878	0.352062
5	8	131.013	26.098	-44.8489	0.051	0.5	1.27643	0.0329486	0.548067	0.152573	0.0314774
5	8	29.728	26.098	-44.8489	0.05	0.72	1.47436	0.0161147	0.629247	1.00264	0.065171
10	9	4289.85	26.0587	-44.8723			0.388475		1.00839		0.273547
10	9	4289.85	26.0587	-44.8723	0.02	0.563108	0.342863	0.0704193	1.09234	0.868404	0.281468
10	9	4206.62	26.0587	-44.8723	0.019	1.17898	0.333637	0.0552199	0.99015	0.754178	0.293468
10	9	4006.07	26.0587	-44.8723	0.018	0.60658	0.35096	0.0692894	1.45058	0.85634	0.548826
10	9	3805.61	26.0587	-44.8723	0.018	0.521549	0.33497	0.070804	1.01065	0.890443	0.279115
10	9	3605.71	26.0587	-44.8723	0.021	0.516547	0.377507	0.0822179	1.2958	1.04733	0.243446
10	9	3405.67	26.0587	-44.8723		0.574919	0.424555		1.26577		0.280597
10	9	3305.36	26.0587	-44.8723	0.017	0.950845	0.473242	0.0723215	1.24179	1.40074	0.274642
10	9	3255.42	26.0587	-44.8723	0.019	0.535713	0.64001	0.0609007	1.41932	1.65231	0.289652
10	9	3229.91	26.0587	-44.8723			1.58024		2.09715		0.299651
10	9	3229.54	26.0587	-44.8723	0.02	0.624047	1.54539	0.0586093	2.08218	5.2521	0.348679
10	9	3205.41	26.0587	-44.8723			1.48256		2.2673		0.369209
10	9	3205.26	26.0587	-44.8723	0.018	0.776118	1.38067	0.0602682	2.14471	4.62421	0.325434
10	9	3190	26.0587	-44.8723							0.372204
10	9	3180.31	26.0587	-44.8723	0.018	0.686058	0.716577	0.0539562	1.59193	1.96266	0.277754
10	9	3154.7	26.0587	-44.8723	0.018	1.01042	0.481442	0.0401901	1.44105	0.897394
10	9	3104.36	26.0587	-44.8723	0.018	0.51078	0.232675	0.0409014	1.50255	0.461304	0.288169
10	9	3005.42	26.0587	-44.8723	0.018	0.529819	0.22099	0.0410083	0.890007	0.423402	0.429014
10	9	2804.89	26.0587	-44.8723	0.017	0.907464	0.161848	0.0442936	0.71504	0.352809	0.418791
10	9	2001.38	26.0587	-44.8723	0.016	0.536105	0.165947	0.0326674	0.681317	0.242911	0.3071
10	9	1252.49	26.0587	-44.8723	0.017	0.655645	0.157952	0.0417615	0.882627	0.383871
10	9	1002.33	26.0587	-44.8723	0.02	0.427594	0.000574	0.0408451	0.0099015	0.326404	0.399893
10	9	250.649	26.0587	-44.8723	0.051	0.706557	0.254712	0.0840339	0.463402	0.166651	0.138447
10	9	30.246	26.0587	-44.8723	0.051	0.728448	1.57973	0.0176786	0.69905	1.00416	0.0412276
30	10	3666.06	25.9018	-44.9644			0.521827		1.18275
30	10	3665.4	25.9018	-44.9644	0.02	0.452969	0.51496	0.0535794	1.30195	1.2222	0.275896
30	10	3605.65	25.9018	-44.9644		0.567988					0.349993
30	10	3605.41	25.9018	-44.9644	0.018		0.505837	0.0644078	1.23728	1.51019	0.247143
30	10	3405.54	25.9018	-44.9644	0.018		0.48749	0.0686834	1.1807	1.62561	0.278599
30	10	3305.81	25.9018	-44.9644	0.018		0.501122	0.0683931	1.22242	2.58486
30	10	3255.4	25.9018	-44.9644	0.018	1.34221	0.606902	0.0652258	1.36786	2.50672	0.258227
30	10	3229.63	25.9018	-44.9644	0.019		0.509835	0.0608588	1.271	1.57223
30	10	3205.07	25.9018	-44.9644		0.835012	0.524185		1.46401		0.239034
30	10	3204.54	25.9018	-44.9644	0.019		0.573078	0.0584978	1.49076	1.3668
30	10	3181.14	25.9018	-44.9644	0.019		0.50471	0.0467178	1.29499	1.46312	0.58967
30	10	3154.74	25.9018	-44.9644	0.019	0.888876	0.715962	0.0519069	1.56845	2.0274	0.368262
30	10	3103.72	25.9018	-44.9644	0.019	0.524145	0.567132	0.0468064	1.47046	1.56713	0.34505
30	10	3004.62	25.9018	-44.9644	0.019	0.747665	0.421377	0.0481437	1.38518	1.0009
30	10	2903.91	25.9018	-44.9644	0.02	0.61479	0.422197	0.0355737	1.38611	0.788829	0.288397
30	10	2804.86	25.9018	-44.9644		0.727612	0.391037		1.33773		0.243992
30	10	2804.6	25.9018	-44.9644	0.018	0.459272	0.386015	0.0460488	1.29509	0.771196	0.282429
30	10	2704.27	25.9018	-44.9644	0.017	0.628895	0.359878	0.0346472	1.19689	0.583536	0.301726
30	10	2608.39	25.9018	-44.9644	0.017	0.422666	0.223348	0.044334	1.11346	0.500989	0.291067
30	10	2004.27	25.9018	-44.9644	0.017	0.409035	0.169125	0.028093	0.717295	0.263692	0.290451
30	10	1249.08	25.9018	-44.9644	0.017	0.281184	0.14842	0.0430797	0.691465	0.394445
30	10	1001.68	25.9018	-44.9644	0.021	0.523603	0.125357	0.0524686	0.613463	0.566454
30	10	250.939	25.9018	-44.9644	0.026	0.572752	0.224373	0.110179	0.412767	0.26815	0.232795
30	10	20.292	25.9018	-44.9644	0.047	0.775068	0.0035465	0.0382258	0.0896875	2.07238	0.0165483
