# Supplementary material for: Mercury fluxes from hydrothermal venting at mid-ocean ridges constrained by measurements
Source: Springer Nature journal article supplement (doi:10.1038/s41561-023-01341-w), 2023-12-12
Supplement: MOESM3 [file 41561_2023_1341_MOESM3_ESM.xlsx]

## Sheet: Sheet1
Station	Depth (m)	DF_1	tHg_efficiency_1	dFe_efficiency_1	DF_2	tHg_efficiency_2	tFe_efficiency_2
3	3554.98	43346.8	67.1865	26.0623	43086.2	67.1324	40.5538		1	calculated with dMn
3	3529.81	33805	63.7097	21.4286	33646.3	63.6603	39.3317		2	calculated with tMn
3	3505.36	29675.6	87.8107	18.5036	29553.3	87.7442	38.5561
3	3480.26	28859.1	71.1053	17.6449	28628.5	70.9982	61.4874
3	3455.32	22572.2	73.3711	14.4499	22489.5	73.3098	36.6594
3	3404.72	19439.4	66.1181	9.18179	19395.6	66.0801	34.7743
3	3354.36	15676.3	48.2638	10.7425	15647.7	48.2376	32.9615
3	3304.58	15035	72.7868	6.02174	14993	72.7244	48.2255
3	3254.83	15826.3	71.2807	6.54568	15797.2	71.2419	30.762
3	3204.17	11829.4	103.2	11.4548	11809.9	103.139	33.9148
4	3505.39	23822.7	73.2815	8.38705	23704.5	73.2018	42.7431
4	3457.04	17486.8		6.33916
4	3456.67	16816.6	77.0233	8.71006	16777.2	76.9721	36.867
4	3405.71	15791.4	67.7164	6.96613	15745.1	67.6575	37.1265
4	3355.25
4	3354.67	11612.2	46.0897	4.13976	11590.3	46.058	33.3578
4	3305.45	18984.5	58.3119	8.02407	18917.7	58.2585	38.3265
4	3255.44	31757.7	82.6772	12.0888	31594.4	82.6032	41.0567
4	3205.4	42364.5		15.0275
4	3205.05	78181.8	77.1812	15.4365	77199.3	77.1042	39.6609
4	3155.34	202830	72.6177	22.1423	196347	72.5416	44.358
4	3155.13	34874.3
4	3104.89	383928	71.2649	24.1109	364407	71.1999	50.2622
5	3355.95	16673.1	74.1556	8.66365	16634.4	74.1064	33.4524
5	3305.19	18090	85.9027	4.08079	18044.5	85.8444	32.7043
5	3304.63	19742.9		5.38261
5	3255.93	14601	61.825	4.10215	14571.3	61.7856	36.796
5	3204.55	25717.7
5	3202.98	203791	91.9962	23.127	198157	91.9136
5	3155.38	267081	62.2004	22.6114	255952	62.1347	45.7847
7	3380.95	241573	72.9895	12.6228
7	3355.37	85317.4	93.9247	32.7692	84148.7	93.8304	65.2206
7	3354.83	83984.3
7	3330.68	46587.2	77.6582	22.2105	46236.5	77.5846	44.4801
7	3305.66	46587.2
7	3305.37	10554.7	60.5669	1.55177	10536.6	60.5267	9.6571
7	3280.76	197248	133.013	11.0412	191964	132.894	43.2532
7	3255.36	275641		12.9616	265432		38.0152
7	3205.15	257485	131.599	16.3805	250000	131.5	36.9058
7	3204.88	279221		17.3657
8	3330.53	145270	59.7626	9.71692	142384	59.7096	38.3425
8	3305.69	124638	66.4523		121813	66.3743
8	3305.6
8	3280	119444	86.4349	8.8653	117486	86.3589	34.5029
8	3255.64	135220	60.7601	10.0652	132716	60.7064	38.1025
8	3249.25	120786
8	3230.39	199074	66.5264	13.8362	192825	66.4567	40.1329
8	3205.02	338583	62.5213	16.9982	320895	62.455	37.2549
9	3305.36	1.34375e+06	118.165	26.279	1.10256e+06	118.038	47.1624
9	3255.42	877551	66.992	20.7194	781818	66.9304	40.3577
9	3229.91	300699		11.2551
9	3229.54	307143	75.8566	11.3777	294520	75.7878	38.5082
9	3205.41	323308		13.0442
9	3205.26	349593	95.6789	13.2536	333333	95.5918	40
9	3190
9	3180.31	754386	85.4959	20.2338	693548	85.4304	41.8334
9	3154.7	1.30303e+06	125.609	29.7264	1.16216e+06	125.531	43.7668
9	3104.36	5.375e+06	63.6712		3.58333e+06	63.6318
