# Supplementary material for: Mercury fluxes from hydrothermal venting at mid-ocean ridges constrained by measurements
Source: Springer Nature journal article supplement (doi:10.1038/s41561-023-01341-w), 2023-12-12
Supplement: MOESM4 [file 41561_2023_1341_MOESM4_ESM.xlsx]

## Sheet: Sheet1
Number in Fig. 3	Zone I	Sample ID	Latitude	Longitude	Type	Hg	Fe	S	Si
			(°N)	(°W)		(ng g-1)	(%)	(%)	(%)
1	Surface	ALV2190-8-1	26° 08.22’	44° 49.56’	Massive granular pyrite	121	67	0.21	32.8
2		ALV2190-12-1	26° 08.19’	44° 49.55’	Red ocher	74	45.4	54.6	0.01
3		ALV2583-3	26° 08.24’	44° 49.58’	Fe oxides with relict sulfides	99	45.8	53.7	0.58
4		ALV2587-1	26° 08.23’	44° 48.46’	Nodular pyrite breccia with minor anhydrite	341	43.2	0.83	55.9
5		ALV2588-1	26° 08.23’	44° 49.59’	Porous Fe oxyhydroxide chimney	409	83.8	0.09	16.1
6		ALV2586-3	26° 08.47’	44° 48.46’	Mn iron oxyhydroxides	103	70.4	0.18	29.4
Black dotted line		Sulfides at mid-ocean ridges 31			Massive sulfides	2000
Black dotted line		Oceanic crust 30				10
Number in Fig. 3	Zone I	Zone	Sample	Lithology	Area	Latitude	Longitude (°W)	Depth (mbsf)	Hg	Fe	S	Si
						(°N)			(ng g-1)	(%)	(%)	(%)
7	Massive sulfide	Massive Sulfide	957H 1N1/14	porous nodular pyrite breccia	TAG2	26° 08.195’	44° 49.555’	9	99.9	48.2	49.8	2.06
8		Massive Sulfide	957P 6R1/3	nodular pyrite breccia	TAG5	26° 08.236’	44° 49.558’	27	101	19.1	19.2	61.7
9		Massive Sulfide	957F 2N1/4	massive granular pyrite	TAG1	26° 08.202’	44° 49.564’’	6	163	52	45.4	2.58
10		Massive Sulfide	957M 2R1/5	porous massive pyrite	TAG4	26° 08.222’	44° 49.588	10	949	52.7	45.3	2.04
11		Massive Sulfide	957A 3X1/1	chert sulfide breccia	TAG2	26° 08.196’	44° 49.552’’	9	1021	25.5	0.01	74.5
12		Massive Sulfide	957I 1N1/3	porous massive pyrite	TAG4	26° 08.226’	44° 49.585	9	1187	53.7	45.1	1.15
13	Stockwork	Anhydrite rich	957C 7N2/1B	nodular siliceous pyrite-anhydrite breccia	TAG1	26° 08.226’	44° 49.555’	21	50.4	27.2	31.4	41.4
14		Pyrite silica	957C 13N2/3C	pyrite-silica breccia	TAG1	26° 08.226’	44° 49.555’	39	237	40.7	39.4	19.9
15		silicified wallrock breccia	957E 12R1/5	silicified wallrock breccia	TAG1	26° 08.219’	44° 49.560’	92	78.4	26.5	26	47.5
16		silicified wallrock breccia	957H 5N2/1C	silicified wallrock breccia	TAG2	26° 08.195’	44° 49.555’	28	81.4	13.9	15.4	70.7
17		silicified wallrock breccia	957C 15N3/7	silicified wallrock breccia	TAG1	26° 08.226’	44° 49.555’	45	90.1	26.4	28.6	45
18		silicified wallrock breccia	957E 10R1/2	massive granular pyrite	TAG1	26° 08.219’	44° 49.560’	82	320	52	44.5	3.55
19		silicified wallrock breccia	957E 9R1/1	massive granular pyrite	TAG1	26° 08.219’	44° 49.560’	78	331	48.7	43.3	7.77
