# Supplementary material for: Mercury fluxes from hydrothermal venting at mid-ocean ridges constrained by measurements
Source: Springer Nature journal article supplement (doi:10.1038/s41561-023-01341-w), 2023-12-12
Supplement: MOESM5 [file 41561_2023_1341_MOESM5_ESM.xlsx]

## Sheet: Sheet1
Sample ID	Dive	Latitude (°N)	Longitude (°W)	Depth	Temperature (°C)	pH	Mg	tHg
				(m)			(mmol l-1)	(pmol l-1)
Seawater							53**	0.80 ± 0.42++
T7	J2-668	26°8.243′	44°49.576′	3619	347	5.11	48.1	367 ± 18
T1	J2 -665	26°8.243′	44°49.579′	3621	303	4.56	32.9	2,968 ± 87
T8	J2-668	26°8.234′	44°49.577′	3621	365	3.01	4.59	4,206 ± 262
Vent fluid end-member							0*	4,966 ± 497+
