# Supplementary material for: Mercury fluxes from hydrothermal venting at mid-ocean ridges constrained by measurements
Source: Springer Nature journal article supplement (doi:10.1038/s41561-023-01341-w), 2023-12-12
Supplement: MOESM6 [file 41561_2023_1341_MOESM6_ESM.xlsx]

## Sheet: Sheet1
Ocean basin	Paper	Journal	DOI	Published_Unpublished	Cruise	Station	Year Collection	Latitude [degrees_north]	Longitude [degrees_east]	Depth [m]	THg [pM]	MeHg [pM]
Atlantic	Leatherland et al. 1971	Nature	DOI: 10.1038/232112a0	YES	North-Eastern Atlantic 1971	7555	1971	47.3667	352.367	1000	29.9
Atlantic	Leatherland et al. 1971	Nature	DOI: 10.1038/232112a1	YES	North-Eastern Atlantic 1971	7555	1971	47.3667	352.367	2200	99.7
Atlantic	Leatherland et al. 1971	Nature	DOI: 10.1038/232112a2	YES	North-Eastern Atlantic 1971	7556	1971	46.5833	351.533	0	74.8
Atlantic	Leatherland et al. 1971	Nature	DOI: 10.1038/232112a3	YES	North-Eastern Atlantic 1971	7556	1971	46.5833	351.533	1000	64.8
Atlantic	Leatherland et al. 1971	Nature	DOI: 10.1038/232112a4	YES	North-Eastern Atlantic 1971	7556	1971	46.5833	351.533	4665	14.9
Atlantic	Leatherland et al. 1971	Nature	DOI: 10.1038/232112a5	YES	North-Eastern Atlantic 1971	7560	1971	47.3667	352.383	3506	74.8
Atlantic	Leatherland et al. 1971	Nature	DOI: 10.1038/232112a6	YES	North-Eastern Atlantic 1971	7602	1971	44.7833	350.833	0	84.7
Atlantic	Leatherland et al. 1971	Nature	DOI: 10.1038/232112a7	YES	North-Eastern Atlantic 1971	7604	1971	40.7	350.483	0	89.7
Atlantic	Leatherland et al. 1971	Nature	DOI: 10.1038/232112a8	YES	North-Eastern Atlantic 1971	7605	1971	39.5333	350.417	0	64.8
Atlantic	Carr et al. 1974	Nature	DOI: 10.1038/251489a0	YES	USNS Mizar	FAMOUS area		36.817	326.734	3200	5434
Atlantic	Carr et al. 1975	Nature	DOI: 10.1038/258588a0	YES	USNS Mizar 1973	FAMOUS area		36.817	326.734	2520	5384
Atlantic	Carr et al. 1975	Nature	DOI: 10.1038/258588a0	YES	RV Knorr 1974	FAMOUS area		36.817	326.734	2350	1246
Atlantic	Carr et al. 1975	Nature	DOI: 10.1038/258588a0	YES	USNS Mizar 1974	FAMOUS area		36.817	326.734	2300	334
Atlantic	Carr et al. 1975	Nature	DOI: 10.1038/258588a0	YES	USNS Bartlett 1975	FAMOUS area		36.817	326.734	2355	389
Atlantic	Mason et al. 1998	Marine Chemistry	DOI: 10.1016/S0304-4203(98)00006-1	YES	International Oceanographic Commission Baseline Trace Metal cruise	2	1993	54.27	-48.98	29.6296
Atlantic	Mason et al. 1998	Marine Chemistry	DOI: 10.1016/S0304-4203(98)00006-1	YES	International Oceanographic Commission Baseline Trace Metal cruise	2	1993	54.27	-48.98	101.463
Atlantic	Mason et al. 1998	Marine Chemistry	DOI: 10.1016/S0304-4203(98)00006-1	YES	International Oceanographic Commission Baseline Trace Metal cruise	2	1993	54.27	-48.98	186.088
Atlantic	Mason et al. 1998	Marine Chemistry	DOI: 10.1016/S0304-4203(98)00006-1	YES	International Oceanographic Commission Baseline Trace Metal cruise	2	1993	54.27	-48.98	453.501
Atlantic	Mason et al. 1998	Marine Chemistry	DOI: 10.1016/S0304-4203(98)00006-1	YES	International Oceanographic Commission Baseline Trace Metal cruise	2	1993	54.27	-48.98	903.922
Atlantic	Mason et al. 1998	Marine Chemistry	DOI: 10.1016/S0304-4203(98)00006-1	YES	International Oceanographic Commission Baseline Trace Metal cruise	2	1993	54.27	-48.98	1286.24
Atlantic	Mason et al. 1998	Marine Chemistry	DOI: 10.1016/S0304-4203(98)00006-1	YES	International Oceanographic Commission Baseline Trace Metal cruise	2	1993	54.27	-48.98	1888.61
Atlantic	Mason et al. 1998	Marine Chemistry	DOI: 10.1016/S0304-4203(98)00006-1	YES	International Oceanographic Commission Baseline Trace Metal cruise	2	1993	54.27	-48.98	2344.32
Atlantic	Mason et al. 1998	Marine Chemistry	DOI: 10.1016/S0304-4203(98)00006-1	YES	International Oceanographic Commission Baseline Trace Metal cruise	2	1993	54.27	-48.98	3096.14
Atlantic	Mason et al. 1998	Marine Chemistry	DOI: 10.1016/S0304-4203(98)00006-1	YES	International Oceanographic Commission Baseline Trace Metal cruise	2	1993	54.27	-48.98	3540.06
Atlantic	Mason et al. 1998	Marine Chemistry	DOI: 10.1016/S0304-4203(98)00006-1	YES	International Oceanographic Commission Baseline Trace Metal cruise	2	1993	54.27	-48.98	44.3407
Atlantic	Mason et al. 1998	Marine Chemistry	DOI: 10.1016/S0304-4203(98)00006-1	YES	International Oceanographic Commission Baseline Trace Metal cruise	2	1993	54.27	-48.98	180.814
Atlantic	Mason et al. 1998	Marine Chemistry	DOI: 10.1016/S0304-4203(98)00006-1	YES	International Oceanographic Commission Baseline Trace Metal cruise	2	1993	54.27	-48.98	902.995
Atlantic	Mason et al. 1998	Marine Chemistry	DOI: 10.1016/S0304-4203(98)00006-1	YES	International Oceanographic Commission Baseline Trace Metal cruise	2	1993	54.27	-48.98	1289.49
Atlantic	Mason et al. 1998	Marine Chemistry	DOI: 10.1016/S0304-4203(98)00006-1	YES	International Oceanographic Commission Baseline Trace Metal cruise	2	1993	54.27	-48.98	1877.56
Atlantic	Mason et al. 1998	Marine Chemistry	DOI: 10.1016/S0304-4203(98)00006-1	YES	International Oceanographic Commission Baseline Trace Metal cruise	2	1993	54.27	-48.98	2319.78
Atlantic	Mason et al. 1998	Marine Chemistry	DOI: 10.1016/S0304-4203(98)00006-1	YES	International Oceanographic Commission Baseline Trace Metal cruise	2	1993	54.27	-48.98	2677.82
Atlantic	Mason et al. 1998	Marine Chemistry	DOI: 10.1016/S0304-4203(98)00006-1	YES	International Oceanographic Commission Baseline Trace Metal cruise	2	1993	54.27	-48.98	3536.36
Atlantic	Mason et al. 1998	Marine Chemistry	DOI: 10.1016/S0304-4203(98)00006-1	YES	International Oceanographic Commission Baseline Trace Metal cruise	3	1993	52.47	-34.89	93.6675
Atlantic	Mason et al. 1998	Marine Chemistry	DOI: 10.1016/S0304-4203(98)00006-1	YES	International Oceanographic Commission Baseline Trace Metal cruise	3	1993	52.47	-34.89	215.04
Atlantic	Mason et al. 1998	Marine Chemistry	DOI: 10.1016/S0304-4203(98)00006-1	YES	International Oceanographic Commission Baseline Trace Metal cruise	3	1993	52.47	-34.89	558.047
Atlantic	Mason et al. 1998	Marine Chemistry	DOI: 10.1016/S0304-4203(98)00006-1	YES	International Oceanographic Commission Baseline Trace Metal cruise	3	1993	52.47	-34.89	959.103
Atlantic	Mason et al. 1998	Marine Chemistry	DOI: 10.1016/S0304-4203(98)00006-1	YES	International Oceanographic Commission Baseline Trace Metal cruise	3	1993	52.47	-34.89	1555.41
Atlantic	Mason et al. 1998	Marine Chemistry	DOI: 10.1016/S0304-4203(98)00006-1	YES	International Oceanographic Commission Baseline Trace Metal cruise	3	1993	52.47	-34.89	1903.69
Atlantic	Mason et al. 1998	Marine Chemistry	DOI: 10.1016/S0304-4203(98)00006-1	YES	International Oceanographic Commission Baseline Trace Metal cruise	3	1993	52.47	-34.89	2457.78
Atlantic	Mason et al. 1998	Marine Chemistry	DOI: 10.1016/S0304-4203(98)00006-1	YES	International Oceanographic Commission Baseline Trace Metal cruise	3	1993	52.47	-34.89	2848.28
Atlantic	Mason et al. 1998	Marine Chemistry	DOI: 10.1016/S0304-4203(98)00006-1	YES	International Oceanographic Commission Baseline Trace Metal cruise	3	1993	52.47	-34.89	199.452
Atlantic	Mason et al. 1998	Marine Chemistry	DOI: 10.1016/S0304-4203(98)00006-1	YES	International Oceanographic Commission Baseline Trace Metal cruise	3	1993	52.47	-34.89	546.236
Atlantic	Mason et al. 1998	Marine Chemistry	DOI: 10.1016/S0304-4203(98)00006-1	YES	International Oceanographic Commission Baseline Trace Metal cruise	3	1993	52.47	-34.89	956.375
Atlantic	Mason et al. 1998	Marine Chemistry	DOI: 10.1016/S0304-4203(98)00006-1	YES	International Oceanographic Commission Baseline Trace Metal cruise	3	1993	52.47	-34.89	1546.06
Atlantic	Mason et al. 1998	Marine Chemistry	DOI: 10.1016/S0304-4203(98)00006-1	YES	International Oceanographic Commission Baseline Trace Metal cruise	3	1993	52.47	-34.89	2451.23
Atlantic	Mason et al. 1998	Marine Chemistry	DOI: 10.1016/S0304-4203(98)00006-1	YES	International Oceanographic Commission Baseline Trace Metal cruise	3	1993	52.47	-34.89	2858.6
Atlantic	Mason et al. 1998	Marine Chemistry	DOI: 10.1016/S0304-4203(98)00006-1	YES	International Oceanographic Commission Baseline Trace Metal cruise	4	1993	55.36	-25.64	2
Atlantic	Mason et al. 1998	Marine Chemistry	DOI: 10.1016/S0304-4203(98)00006-1	YES	International Oceanographic Commission Baseline Trace Metal cruise	4	1993	55.36	-25.64	30.0372
Atlantic	Mason et al. 1998	Marine Chemistry	DOI: 10.1016/S0304-4203(98)00006-1	YES	International Oceanographic Commission Baseline Trace Metal cruise	4	1993	55.36	-25.64	78.1052
Atlantic	Mason et al. 1998	Marine Chemistry	DOI: 10.1016/S0304-4203(98)00006-1	YES	International Oceanographic Commission Baseline Trace Metal cruise	4	1993	55.36	-25.64	748.14
Atlantic	Mason et al. 1998	Marine Chemistry	DOI: 10.1016/S0304-4203(98)00006-1	YES	International Oceanographic Commission Baseline Trace Metal cruise	4	1993	55.36	-25.64	1559.81
Atlantic	Mason et al. 1998	Marine Chemistry	DOI: 10.1016/S0304-4203(98)00006-1	YES	International Oceanographic Commission Baseline Trace Metal cruise	4	1993	55.36	-25.64	1715.24
Atlantic	Mason et al. 1998	Marine Chemistry	DOI: 10.1016/S0304-4203(98)00006-1	YES	International Oceanographic Commission Baseline Trace Metal cruise	4	1993	55.36	-25.64	2187.61
Atlantic	Mason et al. 1998	Marine Chemistry	DOI: 10.1016/S0304-4203(98)00006-1	YES	International Oceanographic Commission Baseline Trace Metal cruise	4	1993	55.36	-25.64	3116.25
Atlantic	Mason et al. 1998	Marine Chemistry	DOI: 10.1016/S0304-4203(98)00006-1	YES	International Oceanographic Commission Baseline Trace Metal cruise	4	1993	55.36	-25.64	3272.53
Atlantic	Mason et al. 1998	Marine Chemistry	DOI: 10.1016/S0304-4203(98)00006-1	YES	International Oceanographic Commission Baseline Trace Metal cruise	4	1993	55.36	-25.64	30.303	1.53623
Atlantic	Mason et al. 1998	Marine Chemistry	DOI: 10.1016/S0304-4203(98)00006-1	YES	International Oceanographic Commission Baseline Trace Metal cruise	4	1993	55.36	-25.64	45.4545	5.55556
Atlantic	Mason et al. 1998	Marine Chemistry	DOI: 10.1016/S0304-4203(98)00006-1	YES	International Oceanographic Commission Baseline Trace Metal cruise	4	1993	55.36	-25.64	202.02	2.94686
Atlantic	Mason et al. 1998	Marine Chemistry	DOI: 10.1016/S0304-4203(98)00006-1	YES	International Oceanographic Commission Baseline Trace Metal cruise	4	1993	55.36	-25.64	1095.96	2.57971
Atlantic	Mason et al. 1998	Marine Chemistry	DOI: 10.1016/S0304-4203(98)00006-1	YES	International Oceanographic Commission Baseline Trace Metal cruise	4	1993	55.36	-25.64	1712.12	3.73913
Atlantic	Mason et al. 1998	Marine Chemistry	DOI: 10.1016/S0304-4203(98)00006-1	YES	International Oceanographic Commission Baseline Trace Metal cruise	4	1993	55.36	-25.64	2181.82	2.03865
Atlantic	Mason et al. 1998	Marine Chemistry	DOI: 10.1016/S0304-4203(98)00006-1	YES	International Oceanographic Commission Baseline Trace Metal cruise	4	1993	55.36	-25.64	2873.74	1.28502
Atlantic	Mason et al. 1998	Marine Chemistry	DOI: 10.1016/S0304-4203(98)00006-1	YES	International Oceanographic Commission Baseline Trace Metal cruise	4	1993	55.36	-25.64	3106.06	1.78744
Atlantic	Mason et al. 1998	Marine Chemistry	DOI: 10.1016/S0304-4203(98)00006-1	YES	International Oceanographic Commission Baseline Trace Metal cruise	4	1993	55.36	-25.64	3282.83	1.30435
Atlantic	Mason et al. 1998	Marine Chemistry	DOI: 10.1016/S0304-4203(98)00006-1	YES	International Oceanographic Commission Baseline Trace Metal cruise	4	1993	55.36	-25.64	15.6094
Atlantic	Mason et al. 1998	Marine Chemistry	DOI: 10.1016/S0304-4203(98)00006-1	YES	International Oceanographic Commission Baseline Trace Metal cruise	4	1993	55.36	-25.64	76.9172
Atlantic	Mason et al. 1998	Marine Chemistry	DOI: 10.1016/S0304-4203(98)00006-1	YES	International Oceanographic Commission Baseline Trace Metal cruise	4	1993	55.36	-25.64	473.467
Atlantic	Mason et al. 1998	Marine Chemistry	DOI: 10.1016/S0304-4203(98)00006-1	YES	International Oceanographic Commission Baseline Trace Metal cruise	4	1993	55.36	-25.64	745.09
Atlantic	Mason et al. 1998	Marine Chemistry	DOI: 10.1016/S0304-4203(98)00006-1	YES	International Oceanographic Commission Baseline Trace Metal cruise	4	1993	55.36	-25.64	1097.94
Atlantic	Mason et al. 1998	Marine Chemistry	DOI: 10.1016/S0304-4203(98)00006-1	YES	International Oceanographic Commission Baseline Trace Metal cruise	4	1993	55.36	-25.64	1550.82
Atlantic	Mason et al. 1998	Marine Chemistry	DOI: 10.1016/S0304-4203(98)00006-1	YES	International Oceanographic Commission Baseline Trace Metal cruise	4	1993	55.36	-25.64	1701.09
Atlantic	Mason et al. 1998	Marine Chemistry	DOI: 10.1016/S0304-4203(98)00006-1	YES	International Oceanographic Commission Baseline Trace Metal cruise	4	1993	55.36	-25.64	2664.53
Atlantic	Mason et al. 1998	Marine Chemistry	DOI: 10.1016/S0304-4203(98)00006-1	YES	International Oceanographic Commission Baseline Trace Metal cruise	4	1993	55.36	-25.64	2875.59
Atlantic	Mason et al. 1998	Marine Chemistry	DOI: 10.1016/S0304-4203(98)00006-1	YES	International Oceanographic Commission Baseline Trace Metal cruise	4	1993	55.36	-25.64	3102.41
Atlantic	Mason et al. 1998	Marine Chemistry	DOI: 10.1016/S0304-4203(98)00006-1	YES	International Oceanographic Commission Baseline Trace Metal cruise	4	1993	55.36	-25.64	3273.7
Atlantic	Mason et al. 1998	Marine Chemistry	DOI: 10.1016/S0304-4203(98)00006-1	YES	International Oceanographic Commission Baseline Trace Metal cruise	5	1993	58.1	-27.95	55.1728
Atlantic	Mason et al. 1998	Marine Chemistry	DOI: 10.1016/S0304-4203(98)00006-1	YES	International Oceanographic Commission Baseline Trace Metal cruise	5	1993	58.1	-27.95	81.6809
Atlantic	Mason et al. 1998	Marine Chemistry	DOI: 10.1016/S0304-4203(98)00006-1	YES	International Oceanographic Commission Baseline Trace Metal cruise	5	1993	58.1	-27.95	97.9501
Atlantic	Mason et al. 1998	Marine Chemistry	DOI: 10.1016/S0304-4203(98)00006-1	YES	International Oceanographic Commission Baseline Trace Metal cruise	5	1993	58.1	-27.95	193.43
Atlantic	Mason et al. 1998	Marine Chemistry	DOI: 10.1016/S0304-4203(98)00006-1	YES	International Oceanographic Commission Baseline Trace Metal cruise	5	1993	58.1	-27.95	499.058
Atlantic	Mason et al. 1998	Marine Chemistry	DOI: 10.1016/S0304-4203(98)00006-1	YES	International Oceanographic Commission Baseline Trace Metal cruise	5	1993	58.1	-27.95	776.576
Atlantic	Mason et al. 1998	Marine Chemistry	DOI: 10.1016/S0304-4203(98)00006-1	YES	International Oceanographic Commission Baseline Trace Metal cruise	5	1993	58.1	-27.95	1140.03
Atlantic	Mason et al. 1998	Marine Chemistry	DOI: 10.1016/S0304-4203(98)00006-1	YES	International Oceanographic Commission Baseline Trace Metal cruise	5	1993	58.1	-27.95	1373.57
Atlantic	Mason et al. 1998	Marine Chemistry	DOI: 10.1016/S0304-4203(98)00006-1	YES	International Oceanographic Commission Baseline Trace Metal cruise	5	1993	58.1	-27.95	1769.88
Atlantic	Mason et al. 1998	Marine Chemistry	DOI: 10.1016/S0304-4203(98)00006-1	YES	International Oceanographic Commission Baseline Trace Metal cruise	5	1993	58.1	-27.95	1894.25
Atlantic	Mason et al. 1998	Marine Chemistry	DOI: 10.1016/S0304-4203(98)00006-1	YES	International Oceanographic Commission Baseline Trace Metal cruise	5	1993	58.1	-27.95	25.2525	1.10059
Atlantic	Mason et al. 1998	Marine Chemistry	DOI: 10.1016/S0304-4203(98)00006-1	YES	International Oceanographic Commission Baseline Trace Metal cruise	5	1993	58.1	-27.95	55.5556	0.634958
Atlantic	Mason et al. 1998	Marine Chemistry	DOI: 10.1016/S0304-4203(98)00006-1	YES	International Oceanographic Commission Baseline Trace Metal cruise	5	1993	58.1	-27.95	85.8586	1.76156
Atlantic	Mason et al. 1998	Marine Chemistry	DOI: 10.1016/S0304-4203(98)00006-1	YES	International Oceanographic Commission Baseline Trace Metal cruise	5	1993	58.1	-27.95	176.768	0.753032
Atlantic	Mason et al. 1998	Marine Chemistry	DOI: 10.1016/S0304-4203(98)00006-1	YES	International Oceanographic Commission Baseline Trace Metal cruise	5	1993	58.1	-27.95	469.697	0.853911
Atlantic	Mason et al. 1998	Marine Chemistry	DOI: 10.1016/S0304-4203(98)00006-1	YES	International Oceanographic Commission Baseline Trace Metal cruise	5	1993	58.1	-27.95	1126.26	1.27018
Atlantic	Mason et al. 1998	Marine Chemistry	DOI: 10.1016/S0304-4203(98)00006-1	YES	International Oceanographic Commission Baseline Trace Metal cruise	5	1993	58.1	-27.95	1742.42	1.47233
Atlantic	Mason et al. 1998	Marine Chemistry	DOI: 10.1016/S0304-4203(98)00006-1	YES	International Oceanographic Commission Baseline Trace Metal cruise	5	1993	58.1	-27.95	1888.89	1.2218
Atlantic	Mason et al. 1998	Marine Chemistry	DOI: 10.1016/S0304-4203(98)00006-1	YES	International Oceanographic Commission Baseline Trace Metal cruise	5	1993	58.1	-27.95	36.4943
Atlantic	Mason et al. 1998	Marine Chemistry	DOI: 10.1016/S0304-4203(98)00006-1	YES	International Oceanographic Commission Baseline Trace Metal cruise	5	1993	58.1	-27.95	82.356
Atlantic	Mason et al. 1998	Marine Chemistry	DOI: 10.1016/S0304-4203(98)00006-1	YES	International Oceanographic Commission Baseline Trace Metal cruise	5	1993	58.1	-27.95	481.483
Atlantic	Mason et al. 1998	Marine Chemistry	DOI: 10.1016/S0304-4203(98)00006-1	YES	International Oceanographic Commission Baseline Trace Metal cruise	5	1993	58.1	-27.95	744.181
Atlantic	Mason et al. 1998	Marine Chemistry	DOI: 10.1016/S0304-4203(98)00006-1	YES	International Oceanographic Commission Baseline Trace Metal cruise	5	1993	58.1	-27.95	1126.11
Atlantic	Mason et al. 1998	Marine Chemistry	DOI: 10.1016/S0304-4203(98)00006-1	YES	International Oceanographic Commission Baseline Trace Metal cruise	5	1993	58.1	-27.95	1369.54
Atlantic	Mason et al. 1998	Marine Chemistry	DOI: 10.1016/S0304-4203(98)00006-1	YES	International Oceanographic Commission Baseline Trace Metal cruise	5	1993	58.1	-27.95	1751.26
Atlantic	Mason et al. 1998	Marine Chemistry	DOI: 10.1016/S0304-4203(98)00006-1	YES	International Oceanographic Commission Baseline Trace Metal cruise	5	1993	58.1	-27.95	1884.69
Atlantic	Mason et al. 1998	Marine Chemistry	DOI: 10.1016/S0304-4203(98)00006-1	YES	International Oceanographic Commission Baseline Trace Metal cruise	7	1993	64.9	-33.52	16.062
Atlantic	Mason et al. 1998	Marine Chemistry	DOI: 10.1016/S0304-4203(98)00006-1	YES	International Oceanographic Commission Baseline Trace Metal cruise	7	1993	64.9	-33.52	44.7345
Atlantic	Mason et al. 1998	Marine Chemistry	DOI: 10.1016/S0304-4203(98)00006-1	YES	International Oceanographic Commission Baseline Trace Metal cruise	7	1993	64.9	-33.52	110.703
Atlantic	Mason et al. 1998	Marine Chemistry	DOI: 10.1016/S0304-4203(98)00006-1	YES	International Oceanographic Commission Baseline Trace Metal cruise	7	1993	64.9	-33.52	179.032
Atlantic	Mason et al. 1998	Marine Chemistry	DOI: 10.1016/S0304-4203(98)00006-1	YES	International Oceanographic Commission Baseline Trace Metal cruise	7	1993	64.9	-33.52	503.494
Atlantic	Mason et al. 1998	Marine Chemistry	DOI: 10.1016/S0304-4203(98)00006-1	YES	International Oceanographic Commission Baseline Trace Metal cruise	7	1993	64.9	-33.52	895.025
Atlantic	Mason et al. 1998	Marine Chemistry	DOI: 10.1016/S0304-4203(98)00006-1	YES	International Oceanographic Commission Baseline Trace Metal cruise	7	1993	64.9	-33.52	1089.34
Atlantic	Mason et al. 1998	Marine Chemistry	DOI: 10.1016/S0304-4203(98)00006-1	YES	International Oceanographic Commission Baseline Trace Metal cruise	7	1993	64.9	-33.52	1408.52
Atlantic	Mason et al. 1998	Marine Chemistry	DOI: 10.1016/S0304-4203(98)00006-1	YES	International Oceanographic Commission Baseline Trace Metal cruise	7	1993	64.9	-33.52	1747.24
Atlantic	Mason et al. 1998	Marine Chemistry	DOI: 10.1016/S0304-4203(98)00006-1	YES	International Oceanographic Commission Baseline Trace Metal cruise	7	1993	64.9	-33.52	2195.2
Atlantic	Mason et al. 1998	Marine Chemistry	DOI: 10.1016/S0304-4203(98)00006-1	YES	International Oceanographic Commission Baseline Trace Metal cruise	7	1993	64.9	-33.52	2536.12
Atlantic	Mason et al. 1998	Marine Chemistry	DOI: 10.1016/S0304-4203(98)00006-1	YES	International Oceanographic Commission Baseline Trace Metal cruise	7	1993	64.9	-33.52	2647.85
Atlantic	Mason et al. 1998	Marine Chemistry	DOI: 10.1016/S0304-4203(98)00006-1	YES	International Oceanographic Commission Baseline Trace Metal cruise	7	1993	64.9	-33.52	2705.04
Atlantic	Mason et al. 1998	Marine Chemistry	DOI: 10.1016/S0304-4203(98)00006-1	YES	International Oceanographic Commission Baseline Trace Metal cruise	7	1993	64.9	-33.52	11.8644	7.23077
Atlantic	Mason et al. 1998	Marine Chemistry	DOI: 10.1016/S0304-4203(98)00006-1	YES	International Oceanographic Commission Baseline Trace Metal cruise	7	1993	64.9	-33.52	93.2203	0.980769
Atlantic	Mason et al. 1998	Marine Chemistry	DOI: 10.1016/S0304-4203(98)00006-1	YES	International Oceanographic Commission Baseline Trace Metal cruise	7	1993	64.9	-33.52	1745.76	2.88462
Atlantic	Mason et al. 1998	Marine Chemistry	DOI: 10.1016/S0304-4203(98)00006-1	YES	International Oceanographic Commission Baseline Trace Metal cruise	7	1993	64.9	-33.52	2696.61	2
Atlantic	Mason et al. 1998	Marine Chemistry	DOI: 10.1016/S0304-4203(98)00006-1	YES	International Oceanographic Commission Baseline Trace Metal cruise	7	1993	64.9	-33.52	30.473
Atlantic	Mason et al. 1998	Marine Chemistry	DOI: 10.1016/S0304-4203(98)00006-1	YES	International Oceanographic Commission Baseline Trace Metal cruise	7	1993	64.9	-33.52	97.3317
Atlantic	Mason et al. 1998	Marine Chemistry	DOI: 10.1016/S0304-4203(98)00006-1	YES	International Oceanographic Commission Baseline Trace Metal cruise	7	1993	64.9	-33.52	494.391
Atlantic	Mason et al. 1998	Marine Chemistry	DOI: 10.1016/S0304-4203(98)00006-1	YES	International Oceanographic Commission Baseline Trace Metal cruise	7	1993	64.9	-33.52	895.29
Atlantic	Mason et al. 1998	Marine Chemistry	DOI: 10.1016/S0304-4203(98)00006-1	YES	International Oceanographic Commission Baseline Trace Metal cruise	7	1993	64.9	-33.52	1100.82
Atlantic	Mason et al. 1998	Marine Chemistry	DOI: 10.1016/S0304-4203(98)00006-1	YES	International Oceanographic Commission Baseline Trace Metal cruise	7	1993	64.9	-33.52	1398.98
Atlantic	Mason et al. 1998	Marine Chemistry	DOI: 10.1016/S0304-4203(98)00006-1	YES	International Oceanographic Commission Baseline Trace Metal cruise	7	1993	64.9	-33.52	1747.42
Atlantic	Mason et al. 1998	Marine Chemistry	DOI: 10.1016/S0304-4203(98)00006-1	YES	International Oceanographic Commission Baseline Trace Metal cruise	7	1993	64.9	-33.52	2204.52
Atlantic	Mason et al. 1998	Marine Chemistry	DOI: 10.1016/S0304-4203(98)00006-1	YES	International Oceanographic Commission Baseline Trace Metal cruise	7	1993	64.9	-33.52	2538.81
Atlantic	Mason et al. 1998	Marine Chemistry	DOI: 10.1016/S0304-4203(98)00006-1	YES	International Oceanographic Commission Baseline Trace Metal cruise	7	1993	64.9	-33.52	2639.23
Atlantic	Mason et al. 1998	Marine Chemistry	DOI: 10.1016/S0304-4203(98)00006-1	YES	International Oceanographic Commission Baseline Trace Metal cruise	7	1993	64.9	-33.52	2684.25
Atlantic	Mason et al. 1998	Marine Chemistry	DOI: 10.1016/S0304-4203(98)00006-1	YES	International Oceanographic Commission Baseline Trace Metal cruise	11	1993	66.78	-31.13	38.4615
Atlantic	Mason et al. 1998	Marine Chemistry	DOI: 10.1016/S0304-4203(98)00006-1	YES	International Oceanographic Commission Baseline Trace Metal cruise	11	1993	66.78	-31.13	118.037
Atlantic	Mason et al. 1998	Marine Chemistry	DOI: 10.1016/S0304-4203(98)00006-1	YES	International Oceanographic Commission Baseline Trace Metal cruise	11	1993	66.78	-31.13	399.204
Atlantic	Mason et al. 1998	Marine Chemistry	DOI: 10.1016/S0304-4203(98)00006-1	YES	International Oceanographic Commission Baseline Trace Metal cruise	11	1993	66.78	-31.13	1003.98
Atlantic	Mason et al. 1998	Marine Chemistry	DOI: 10.1016/S0304-4203(98)00006-1	YES	International Oceanographic Commission Baseline Trace Metal cruise	11	1993	66.78	-31.13	1205.57
Atlantic	Mason et al. 1998	Marine Chemistry	DOI: 10.1016/S0304-4203(98)00006-1	YES	International Oceanographic Commission Baseline Trace Metal cruise	11	1993	66.78	-31.13	1375.33
Atlantic	Mason et al. 1998	Marine Chemistry	DOI: 10.1016/S0304-4203(98)00006-1	YES	International Oceanographic Commission Baseline Trace Metal cruise	11	1993	66.78	-31.13	27.5166	0.917874
Atlantic	Mason et al. 1998	Marine Chemistry	DOI: 10.1016/S0304-4203(98)00006-1	YES	International Oceanographic Commission Baseline Trace Metal cruise	11	1993	66.78	-31.13	97.6792	1.53623
Atlantic	Mason et al. 1998	Marine Chemistry	DOI: 10.1016/S0304-4203(98)00006-1	YES	International Oceanographic Commission Baseline Trace Metal cruise	11	1993	66.78	-31.13	393.63	3.93237
Atlantic	Mason et al. 1998	Marine Chemistry	DOI: 10.1016/S0304-4203(98)00006-1	YES	International Oceanographic Commission Baseline Trace Metal cruise	11	1993	66.78	-31.13	1001.32	4.26087
Atlantic	Mason et al. 1998	Marine Chemistry	DOI: 10.1016/S0304-4203(98)00006-1	YES	International Oceanographic Commission Baseline Trace Metal cruise	11	1993	66.78	-31.13	1199.37	3.93237
Atlantic	Mason et al. 1998	Marine Chemistry	DOI: 10.1016/S0304-4203(98)00006-1	YES	International Oceanographic Commission Baseline Trace Metal cruise	11	1993	66.78	-31.13	1371.74	3.8744
Atlantic	Mason et al. 1998	Marine Chemistry	DOI: 10.1016/S0304-4203(98)00006-1	YES	International Oceanographic Commission Baseline Trace Metal cruise	11	1993	66.78	-31.13	105.409
Atlantic	Mason et al. 1998	Marine Chemistry	DOI: 10.1016/S0304-4203(98)00006-1	YES	International Oceanographic Commission Baseline Trace Metal cruise	11	1993	66.78	-31.13	411.006
Atlantic	Mason et al. 1998	Marine Chemistry	DOI: 10.1016/S0304-4203(98)00006-1	YES	International Oceanographic Commission Baseline Trace Metal cruise	11	1993	66.78	-31.13	998.706
Atlantic	Mason et al. 1998	Marine Chemistry	DOI: 10.1016/S0304-4203(98)00006-1	YES	International Oceanographic Commission Baseline Trace Metal cruise	11	1993	66.78	-31.13	1202.75
Atlantic	Mason et al. 1998	Marine Chemistry	DOI: 10.1016/S0304-4203(98)00006-1	YES	International Oceanographic Commission Baseline Trace Metal cruise	11	1993	66.78	-31.13	1373.65
Atlantic	Mason et al. 1998	Marine Chemistry	DOI: 10.1016/S0304-4203(98)00006-1	YES	International Oceanographic Commission Baseline Trace Metal cruise	12	1993	70.75	-22.97	65.2444
Atlantic	Mason et al. 1998	Marine Chemistry	DOI: 10.1016/S0304-4203(98)00006-1	YES	International Oceanographic Commission Baseline Trace Metal cruise	12	1993	70.75	-22.97	46.4899
Atlantic	Mason et al. 1998	Marine Chemistry	DOI: 10.1016/S0304-4203(98)00006-1	YES	International Oceanographic Commission Baseline Trace Metal cruise	12	1993	70.75	-22.97	103.205
Atlantic	Mason et al. 1998	Marine Chemistry	DOI: 10.1016/S0304-4203(98)00006-1	YES	International Oceanographic Commission Baseline Trace Metal cruise	12	1993	70.75	-22.97	217.719
Atlantic	Mason et al. 1998	Marine Chemistry	DOI: 10.1016/S0304-4203(98)00006-1	YES	International Oceanographic Commission Baseline Trace Metal cruise	12	1993	70.75	-22.97	300.052
Atlantic	Mason et al. 1998	Marine Chemistry	DOI: 10.1016/S0304-4203(98)00006-1	YES	International Oceanographic Commission Baseline Trace Metal cruise	12	1993	70.75	-22.97	471.642
Atlantic	Mason et al. 1998	Marine Chemistry	DOI: 10.1016/S0304-4203(98)00006-1	YES	International Oceanographic Commission Baseline Trace Metal cruise	12	1993	70.75	-22.97	1111.25
Atlantic	Mason et al. 1998	Marine Chemistry	DOI: 10.1016/S0304-4203(98)00006-1	YES	International Oceanographic Commission Baseline Trace Metal cruise	12	1993	70.75	-22.97	50.3552
Atlantic	Mason et al. 1998	Marine Chemistry	DOI: 10.1016/S0304-4203(98)00006-1	YES	International Oceanographic Commission Baseline Trace Metal cruise	12	1993	70.75	-22.97	101.332
Atlantic	Mason et al. 1998	Marine Chemistry	DOI: 10.1016/S0304-4203(98)00006-1	YES	International Oceanographic Commission Baseline Trace Metal cruise	12	1993	70.75	-22.97	195.046
Atlantic	Mason et al. 1998	Marine Chemistry	DOI: 10.1016/S0304-4203(98)00006-1	YES	International Oceanographic Commission Baseline Trace Metal cruise	12	1993	70.75	-22.97	290.218
Atlantic	Mason et al. 1998	Marine Chemistry	DOI: 10.1016/S0304-4203(98)00006-1	YES	International Oceanographic Commission Baseline Trace Metal cruise	12	1993	70.75	-22.97	450.658
Atlantic	Mason et al. 1998	Marine Chemistry	DOI: 10.1016/S0304-4203(98)00006-1	YES	International Oceanographic Commission Baseline Trace Metal cruise	12	1993	70.75	-22.97	889.78
Atlantic	Mason et al. 1998	Marine Chemistry	DOI: 10.1016/S0304-4203(98)00006-1	YES	International Oceanographic Commission Baseline Trace Metal cruise	12	1993	70.75	-22.97	1088.09
Atlantic	Mason et al. 1998	Marine Chemistry	DOI: 10.1016/S0304-4203(98)00006-1	YES	International Oceanographic Commission Baseline Trace Metal cruise	12	1993	70.75	-22.97	1235.03
Atlantic	Mason et al. 1998	Marine Chemistry	DOI: 10.1016/S0304-4203(98)00006-1	YES	International Oceanographic Commission Baseline Trace Metal cruise	13	1993	66.2	-6.34	15.625
Atlantic	Mason et al. 1998	Marine Chemistry	DOI: 10.1016/S0304-4203(98)00006-1	YES	International Oceanographic Commission Baseline Trace Metal cruise	13	1993	66.2	-6.34	46.875
Atlantic	Mason et al. 1998	Marine Chemistry	DOI: 10.1016/S0304-4203(98)00006-1	YES	International Oceanographic Commission Baseline Trace Metal cruise	13	1993	66.2	-6.34	93.75
Atlantic	Mason et al. 1998	Marine Chemistry	DOI: 10.1016/S0304-4203(98)00006-1	YES	International Oceanographic Commission Baseline Trace Metal cruise	13	1993	66.2	-6.34	166.667
Atlantic	Mason et al. 1998	Marine Chemistry	DOI: 10.1016/S0304-4203(98)00006-1	YES	International Oceanographic Commission Baseline Trace Metal cruise	13	1993	66.2	-6.34	395.833
Atlantic	Mason et al. 1998	Marine Chemistry	DOI: 10.1016/S0304-4203(98)00006-1	YES	International Oceanographic Commission Baseline Trace Metal cruise	13	1993	66.2	-6.34	645.833
Atlantic	Mason et al. 1998	Marine Chemistry	DOI: 10.1016/S0304-4203(98)00006-1	YES	International Oceanographic Commission Baseline Trace Metal cruise	13	1993	66.2	-6.34	854.167
Atlantic	Mason et al. 1998	Marine Chemistry	DOI: 10.1016/S0304-4203(98)00006-1	YES	International Oceanographic Commission Baseline Trace Metal cruise	13	1993	66.2	-6.34	1338.54
Atlantic	Mason et al. 1998	Marine Chemistry	DOI: 10.1016/S0304-4203(98)00006-1	YES	International Oceanographic Commission Baseline Trace Metal cruise	13	1993	66.2	-6.34	1697.92
Atlantic	Mason et al. 1998	Marine Chemistry	DOI: 10.1016/S0304-4203(98)00006-1	YES	International Oceanographic Commission Baseline Trace Metal cruise	13	1993	66.2	-6.34	2098.96
Atlantic	Mason et al. 1998	Marine Chemistry	DOI: 10.1016/S0304-4203(98)00006-1	YES	International Oceanographic Commission Baseline Trace Metal cruise	13	1993	66.2	-6.34	2484.38
Atlantic	Mason et al. 1998	Marine Chemistry	DOI: 10.1016/S0304-4203(98)00006-1	YES	International Oceanographic Commission Baseline Trace Metal cruise	13	1993	66.2	-6.34	3078.12
Atlantic	Mason et al. 1998	Marine Chemistry	DOI: 10.1016/S0304-4203(98)00006-1	YES	International Oceanographic Commission Baseline Trace Metal cruise	13	1993	66.2	-6.34	3807.29
Atlantic	Mason et al. 1998	Marine Chemistry	DOI: 10.1016/S0304-4203(98)00006-1	YES	International Oceanographic Commission Baseline Trace Metal cruise	13	1993	66.2	-6.34	42.7688
Atlantic	Mason et al. 1998	Marine Chemistry	DOI: 10.1016/S0304-4203(98)00006-1	YES	International Oceanographic Commission Baseline Trace Metal cruise	13	1993	66.2	-6.34	101.883
Atlantic	Mason et al. 1998	Marine Chemistry	DOI: 10.1016/S0304-4203(98)00006-1	YES	International Oceanographic Commission Baseline Trace Metal cruise	13	1993	66.2	-6.34	177.154
Atlantic	Mason et al. 1998	Marine Chemistry	DOI: 10.1016/S0304-4203(98)00006-1	YES	International Oceanographic Commission Baseline Trace Metal cruise	13	1993	66.2	-6.34	390.755
Atlantic	Mason et al. 1998	Marine Chemistry	DOI: 10.1016/S0304-4203(98)00006-1	YES	International Oceanographic Commission Baseline Trace Metal cruise	13	1993	66.2	-6.34	648.043
Atlantic	Mason et al. 1998	Marine Chemistry	DOI: 10.1016/S0304-4203(98)00006-1	YES	International Oceanographic Commission Baseline Trace Metal cruise	13	1993	66.2	-6.34	858.563
Atlantic	Mason et al. 1998	Marine Chemistry	DOI: 10.1016/S0304-4203(98)00006-1	YES	International Oceanographic Commission Baseline Trace Metal cruise	13	1993	66.2	-6.34	1347.18
Atlantic	Mason et al. 1998	Marine Chemistry	DOI: 10.1016/S0304-4203(98)00006-1	YES	International Oceanographic Commission Baseline Trace Metal cruise	13	1993	66.2	-6.34	1698.7
Atlantic	Mason et al. 1998	Marine Chemistry	DOI: 10.1016/S0304-4203(98)00006-1	YES	International Oceanographic Commission Baseline Trace Metal cruise	13	1993	66.2	-6.34	2101.07
Atlantic	Mason et al. 1998	Marine Chemistry	DOI: 10.1016/S0304-4203(98)00006-1	YES	International Oceanographic Commission Baseline Trace Metal cruise	13	1993	66.2	-6.34	2476.83
Atlantic	Mason et al. 1998	Marine Chemistry	DOI: 10.1016/S0304-4203(98)00006-1	YES	International Oceanographic Commission Baseline Trace Metal cruise	13	1993	66.2	-6.34	3076.19
Atlantic	Mason et al. 1998	Marine Chemistry	DOI: 10.1016/S0304-4203(98)00006-1	YES	International Oceanographic Commission Baseline Trace Metal cruise	13	1993	66.2	-6.34	3793.72
Atlantic	Mason et al. 1998	Marine Chemistry	DOI: 10.1016/S0304-4203(98)00006-1	YES	International Oceanographic Commission Baseline Trace Metal cruise	14	1993	63.16	-8.95	86.2069
Atlantic	Mason et al. 1998	Marine Chemistry	DOI: 10.1016/S0304-4203(98)00006-1	YES	International Oceanographic Commission Baseline Trace Metal cruise	14	1993	63.16	-8.95	231.034
Atlantic	Mason et al. 1998	Marine Chemistry	DOI: 10.1016/S0304-4203(98)00006-1	YES	International Oceanographic Commission Baseline Trace Metal cruise	14	1993	63.16	-8.95	479.31
Atlantic	Mason et al. 1998	Marine Chemistry	DOI: 10.1016/S0304-4203(98)00006-1	YES	International Oceanographic Commission Baseline Trace Metal cruise	14	1993	63.16	-8.95	660.345
Atlantic	Mason et al. 1998	Marine Chemistry	DOI: 10.1016/S0304-4203(98)00006-1	YES	International Oceanographic Commission Baseline Trace Metal cruise	14	1993	63.16	-8.95	717.241
Atlantic	Mason et al. 1998	Marine Chemistry	DOI: 10.1016/S0304-4203(98)00006-1	YES	International Oceanographic Commission Baseline Trace Metal cruise	14	1993	63.16	-8.95	789.655
Atlantic	Mason et al. 1998	Marine Chemistry	DOI: 10.1016/S0304-4203(98)00006-1	YES	International Oceanographic Commission Baseline Trace Metal cruise	14	1993	63.16	-8.95	467.742
Atlantic	Mason et al. 1998	Marine Chemistry	DOI: 10.1016/S0304-4203(98)00006-1	YES	International Oceanographic Commission Baseline Trace Metal cruise	14	1993	63.16	-8.95	661.29
Atlantic	Mason et al. 1998	Marine Chemistry	DOI: 10.1016/S0304-4203(98)00006-1	YES	International Oceanographic Commission Baseline Trace Metal cruise	14	1993	63.16	-8.95	698.925
Atlantic	Mason et al. 1998	Marine Chemistry	DOI: 10.1016/S0304-4203(98)00006-1	YES	International Oceanographic Commission Baseline Trace Metal cruise	14	1993	63.16	-8.95	790.323
Atlantic	Mason & Sullivan. 1999	Deep Sea Research II	DOI: 10.1016/S0967-0645(99)00010-7	YES	Third International Oceanographic Commission Baseline Trace Metal cruise	10	1996	-33	-40	29.8682
Atlantic	Mason & Sullivan. 1999	Deep Sea Research II	DOI: 10.1016/S0967-0645(99)00010-7	YES	Third International Oceanographic Commission Baseline Trace Metal cruise	10	1996	-33	-40	82.017
Atlantic	Mason & Sullivan. 1999	Deep Sea Research II	DOI: 10.1016/S0967-0645(99)00010-7	YES	Third International Oceanographic Commission Baseline Trace Metal cruise	10	1996	-33	-40	176.657
Atlantic	Mason & Sullivan. 1999	Deep Sea Research II	DOI: 10.1016/S0967-0645(99)00010-7	YES	Third International Oceanographic Commission Baseline Trace Metal cruise	10	1996	-33	-40	251.086
Atlantic	Mason & Sullivan. 1999	Deep Sea Research II	DOI: 10.1016/S0967-0645(99)00010-7	YES	Third International Oceanographic Commission Baseline Trace Metal cruise	10	1996	-33	-40	448.093
Atlantic	Mason & Sullivan. 1999	Deep Sea Research II	DOI: 10.1016/S0967-0645(99)00010-7	YES	Third International Oceanographic Commission Baseline Trace Metal cruise	10	1996	-33	-40	750.707
Atlantic	Mason & Sullivan. 1999	Deep Sea Research II	DOI: 10.1016/S0967-0645(99)00010-7	YES	Third International Oceanographic Commission Baseline Trace Metal cruise	10	1996	-33	-40	975.857
Atlantic	Mason & Sullivan. 1999	Deep Sea Research II	DOI: 10.1016/S0967-0645(99)00010-7	YES	Third International Oceanographic Commission Baseline Trace Metal cruise	10	1996	-33	-40	1474.24
Atlantic	Mason & Sullivan. 1999	Deep Sea Research II	DOI: 10.1016/S0967-0645(99)00010-7	YES	Third International Oceanographic Commission Baseline Trace Metal cruise	10	1996	-33	-40	2174.86
Atlantic	Mason & Sullivan. 1999	Deep Sea Research II	DOI: 10.1016/S0967-0645(99)00010-7	YES	Third International Oceanographic Commission Baseline Trace Metal cruise	10	1996	-33	-40	2751.33
Atlantic	Mason & Sullivan. 1999	Deep Sea Research II	DOI: 10.1016/S0967-0645(99)00010-7	YES	Third International Oceanographic Commission Baseline Trace Metal cruise	10	1996	-33	-40	3499.34
Atlantic	Mason & Sullivan. 1999	Deep Sea Research II	DOI: 10.1016/S0967-0645(99)00010-7	YES	Third International Oceanographic Commission Baseline Trace Metal cruise	10	1996	-33	-40	4469
Atlantic	Mason & Sullivan. 1999	Deep Sea Research II	DOI: 10.1016/S0967-0645(99)00010-7	YES	Third International Oceanographic Commission Baseline Trace Metal cruise	8	1996	-17	-25	12.8828	2.05032
Atlantic	Mason & Sullivan. 1999	Deep Sea Research II	DOI: 10.1016/S0967-0645(99)00010-7	YES	Third International Oceanographic Commission Baseline Trace Metal cruise	8	1996	-17	-25	63.241	1.60245
Atlantic	Mason & Sullivan. 1999	Deep Sea Research II	DOI: 10.1016/S0967-0645(99)00010-7	YES	Third International Oceanographic Commission Baseline Trace Metal cruise	8	1996	-17	-25	149.041	0.870018
Atlantic	Mason & Sullivan. 1999	Deep Sea Research II	DOI: 10.1016/S0967-0645(99)00010-7	YES	Third International Oceanographic Commission Baseline Trace Metal cruise	8	1996	-17	-25	235.793	1.29451
Atlantic	Mason & Sullivan. 1999	Deep Sea Research II	DOI: 10.1016/S0967-0645(99)00010-7	YES	Third International Oceanographic Commission Baseline Trace Metal cruise	8	1996	-17	-25	438.692	1.51375
Atlantic	Mason & Sullivan. 1999	Deep Sea Research II	DOI: 10.1016/S0967-0645(99)00010-7	YES	Third International Oceanographic Commission Baseline Trace Metal cruise	8	1996	-17	-25	700.159	0.960399
Atlantic	Mason & Sullivan. 1999	Deep Sea Research II	DOI: 10.1016/S0967-0645(99)00010-7	YES	Third International Oceanographic Commission Baseline Trace Metal cruise	8	1996	-17	-25	950.815	2.66085
Atlantic	Mason & Sullivan. 1999	Deep Sea Research II	DOI: 10.1016/S0967-0645(99)00010-7	YES	Third International Oceanographic Commission Baseline Trace Metal cruise	8	1996	-17	-25	1398.47	1.49425
Atlantic	Mason & Sullivan. 1999	Deep Sea Research II	DOI: 10.1016/S0967-0645(99)00010-7	YES	Third International Oceanographic Commission Baseline Trace Metal cruise	8	1996	-17	-25	1603.16	1.65273
Atlantic	Mason & Sullivan. 1999	Deep Sea Research II	DOI: 10.1016/S0967-0645(99)00010-7	YES	Third International Oceanographic Commission Baseline Trace Metal cruise	8	1996	-17	-25	1752.33	3.6189
Atlantic	Mason & Sullivan. 1999	Deep Sea Research II	DOI: 10.1016/S0967-0645(99)00010-7	YES	Third International Oceanographic Commission Baseline Trace Metal cruise	8	1996	-17	-25	2202.22	1.82301
Atlantic	Mason & Sullivan. 1999	Deep Sea Research II	DOI: 10.1016/S0967-0645(99)00010-7	YES	Third International Oceanographic Commission Baseline Trace Metal cruise	8	1996	-17	-25	2749.27	1.7511
Atlantic	Mason & Sullivan. 1999	Deep Sea Research II	DOI: 10.1016/S0967-0645(99)00010-7	YES	Third International Oceanographic Commission Baseline Trace Metal cruise	8	1996	-17	-25	5038.04	1.86692
Atlantic	Mason & Sullivan. 1999	Deep Sea Research II	DOI: 10.1016/S0967-0645(99)00010-7	YES	Third International Oceanographic Commission Baseline Trace Metal cruise	8	1996	-17	-25	5147.01	5.98655
Atlantic	Mason & Sullivan. 1999	Deep Sea Research II	DOI: 10.1016/S0967-0645(99)00010-7	YES	Third International Oceanographic Commission Baseline Trace Metal cruise	RFZ	1996	-0.583333	-20	2	0.720595
Atlantic	Mason & Sullivan. 1999	Deep Sea Research II	DOI: 10.1016/S0967-0645(99)00010-7	YES	Third International Oceanographic Commission Baseline Trace Metal cruise	RFZ	1996	-0.583333	-20	57.8559	2.08959
Atlantic	Mason & Sullivan. 1999	Deep Sea Research II	DOI: 10.1016/S0967-0645(99)00010-7	YES	Third International Oceanographic Commission Baseline Trace Metal cruise	RFZ	1996	-0.583333	-20	84.351	1.45858
Atlantic	Mason & Sullivan. 1999	Deep Sea Research II	DOI: 10.1016/S0967-0645(99)00010-7	YES	Third International Oceanographic Commission Baseline Trace Metal cruise	RFZ	1996	-0.583333	-20	150.149	0.791286
Atlantic	Mason & Sullivan. 1999	Deep Sea Research II	DOI: 10.1016/S0967-0645(99)00010-7	YES	Third International Oceanographic Commission Baseline Trace Metal cruise	RFZ	1996	-0.583333	-20	215.319	2.35823
Atlantic	Mason & Sullivan. 1999	Deep Sea Research II	DOI: 10.1016/S0967-0645(99)00010-7	YES	Third International Oceanographic Commission Baseline Trace Metal cruise	RFZ	1996	-0.583333	-20	321.237	4.89782
Atlantic	Mason & Sullivan. 1999	Deep Sea Research II	DOI: 10.1016/S0967-0645(99)00010-7	YES	Third International Oceanographic Commission Baseline Trace Metal cruise	RFZ	1996	-0.583333	-20	696.688	1.34501
Atlantic	Mason & Sullivan. 1999	Deep Sea Research II	DOI: 10.1016/S0967-0645(99)00010-7	YES	Third International Oceanographic Commission Baseline Trace Metal cruise	RFZ	1996	-0.583333	-20	890.253	1.00085
Atlantic	Mason & Sullivan. 1999	Deep Sea Research II	DOI: 10.1016/S0967-0645(99)00010-7	YES	Third International Oceanographic Commission Baseline Trace Metal cruise	RFZ	1996	-0.583333	-20	1594.76	1.06658
Atlantic	Mason & Sullivan. 1999	Deep Sea Research II	DOI: 10.1016/S0967-0645(99)00010-7	YES	Third International Oceanographic Commission Baseline Trace Metal cruise	RFZ	1996	-0.583333	-20	1847.97	0.830084
Atlantic	Mason & Sullivan. 1999	Deep Sea Research II	DOI: 10.1016/S0967-0645(99)00010-7	YES	Third International Oceanographic Commission Baseline Trace Metal cruise	RFZ	1996	-0.583333	-20	2244.64	1.72747
Atlantic	Mason & Sullivan. 1999	Deep Sea Research II	DOI: 10.1016/S0967-0645(99)00010-7	YES	Third International Oceanographic Commission Baseline Trace Metal cruise	RFZ	1996	-0.583333	-20	2687.96	1.05672
Atlantic	Mason & Sullivan. 1999	Deep Sea Research II	DOI: 10.1016/S0967-0645(99)00010-7	YES	Third International Oceanographic Commission Baseline Trace Metal cruise	RFZ	1996	-0.583333	-20	3387.07	1.0684
Atlantic	Mason & Sullivan. 1999	Deep Sea Research II	DOI: 10.1016/S0967-0645(99)00010-7	YES	Third International Oceanographic Commission Baseline Trace Metal cruise	RFZ	1996	-0.583333	-20	5193.13	1.57479
Atlantic	Mason & Sullivan. 1999	Deep Sea Research II	DOI: 10.1016/S0967-0645(99)00010-7	YES	Third International Oceanographic Commission Baseline Trace Metal cruise	RFZ	1996	-0.583333	-20	5324.47	1.87984
Atlantic	Mason & Sullivan. 1999	Deep Sea Research II	DOI: 10.1016/S0967-0645(99)00010-7	YES	Third International Oceanographic Commission Baseline Trace Metal cruise	6	1996	7.5	-25	13.445	1.80556
Atlantic	Mason & Sullivan. 1999	Deep Sea Research II	DOI: 10.1016/S0967-0645(99)00010-7	YES	Third International Oceanographic Commission Baseline Trace Metal cruise	6	1996	7.5	-25	88.212	1.25
Atlantic	Mason & Sullivan. 1999	Deep Sea Research II	DOI: 10.1016/S0967-0645(99)00010-7	YES	Third International Oceanographic Commission Baseline Trace Metal cruise	6	1996	7.5	-25	126.02	1.89815
Atlantic	Mason & Sullivan. 1999	Deep Sea Research II	DOI: 10.1016/S0967-0645(99)00010-7	YES	Third International Oceanographic Commission Baseline Trace Metal cruise	6	1996	7.5	-25	219.537	2.26852
Atlantic	Mason & Sullivan. 1999	Deep Sea Research II	DOI: 10.1016/S0967-0645(99)00010-7	YES	Third International Oceanographic Commission Baseline Trace Metal cruise	6	1996	7.5	-25	325.707	2.36111
Atlantic	Mason & Sullivan. 1999	Deep Sea Research II	DOI: 10.1016/S0967-0645(99)00010-7	YES	Third International Oceanographic Commission Baseline Trace Metal cruise	6	1996	7.5	-25	475.512	3.14815
Atlantic	Mason & Sullivan. 1999	Deep Sea Research II	DOI: 10.1016/S0967-0645(99)00010-7	YES	Third International Oceanographic Commission Baseline Trace Metal cruise	6	1996	7.5	-25	650.971	2.40741
Atlantic	Mason & Sullivan. 1999	Deep Sea Research II	DOI: 10.1016/S0967-0645(99)00010-7	YES	Third International Oceanographic Commission Baseline Trace Metal cruise	6	1996	7.5	-25	782.489	4.90741
Atlantic	Mason & Sullivan. 1999	Deep Sea Research II	DOI: 10.1016/S0967-0645(99)00010-7	YES	Third International Oceanographic Commission Baseline Trace Metal cruise	6	1996	7.5	-25	952.2	2.63889
Atlantic	Mason & Sullivan. 1999	Deep Sea Research II	DOI: 10.1016/S0967-0645(99)00010-7	YES	Third International Oceanographic Commission Baseline Trace Metal cruise	6	1996	7.5	-25	1456.86	1.85185
Atlantic	Mason & Sullivan. 1999	Deep Sea Research II	DOI: 10.1016/S0967-0645(99)00010-7	YES	Third International Oceanographic Commission Baseline Trace Metal cruise	6	1996	7.5	-25	1900.52	2.08333
Atlantic	Mason & Sullivan. 1999	Deep Sea Research II	DOI: 10.1016/S0967-0645(99)00010-7	YES	Third International Oceanographic Commission Baseline Trace Metal cruise	6	1996	7.5	-25	2400.94	2.31481
Atlantic	Mason & Sullivan. 1999	Deep Sea Research II	DOI: 10.1016/S0967-0645(99)00010-7	YES	Third International Oceanographic Commission Baseline Trace Metal cruise	6	1996	7.5	-25	2901.51	5.60185
Atlantic	Mason & Sullivan. 1999	Deep Sea Research II	DOI: 10.1016/S0967-0645(99)00010-7	YES	Third International Oceanographic Commission Baseline Trace Metal cruise	6	1996	7.5	-25	3300.88	5.83333
Atlantic	Mason & Sullivan. 1999	Deep Sea Research II	DOI: 10.1016/S0967-0645(99)00010-7	YES	Third International Oceanographic Commission Baseline Trace Metal cruise	6	1996	7.5	-25	3707.01	7.68519
Atlantic	Mason & Sullivan. 1999	Deep Sea Research II	DOI: 10.1016/S0967-0645(99)00010-7	YES	Third International Oceanographic Commission Baseline Trace Metal cruise	6	1996	7.5	-25	4106.58	3.28704
Atlantic	Mason & Sullivan. 1999	Deep Sea Research II	DOI: 10.1016/S0967-0645(99)00010-7	YES	Third International Oceanographic Commission Baseline Trace Metal cruise	6	1996	7.5	-25	4357.5	12.8704
Atlantic	Mason & Sullivan. 1999	Deep Sea Research II	DOI: 10.1016/S0967-0645(99)00010-7	YES	Third International Oceanographic Commission Baseline Trace Metal cruise	6	1996	7.5	-25	4532.15	13.3333
Atlantic	Mason & Sullivan. 1999	Deep Sea Research II	DOI: 10.1016/S0967-0645(99)00010-7	YES	Third International Oceanographic Commission Baseline Trace Metal cruise	Amazon	1996	5.8	-47.9833	2.9212	1.89078
Atlantic	Mason & Sullivan. 1999	Deep Sea Research II	DOI: 10.1016/S0967-0645(99)00010-7	YES	Third International Oceanographic Commission Baseline Trace Metal cruise	Amazon	1996	5.8	-47.9833	12.4698	2.17227
Atlantic	Mason & Sullivan. 1999	Deep Sea Research II	DOI: 10.1016/S0967-0645(99)00010-7	YES	Third International Oceanographic Commission Baseline Trace Metal cruise	Amazon	1996	5.8	-47.9833	39.3342	0.870838
Atlantic	Mason & Sullivan. 1999	Deep Sea Research II	DOI: 10.1016/S0967-0645(99)00010-7	YES	Third International Oceanographic Commission Baseline Trace Metal cruise	Amazon	1996	5.8	-47.9833	134.156	1.84213
Atlantic	Mason & Sullivan. 1999	Deep Sea Research II	DOI: 10.1016/S0967-0645(99)00010-7	YES	Third International Oceanographic Commission Baseline Trace Metal cruise	Amazon	1996	5.8	-47.9833	219.709	1.32355
Atlantic	Mason & Sullivan. 1999	Deep Sea Research II	DOI: 10.1016/S0967-0645(99)00010-7	YES	Third International Oceanographic Commission Baseline Trace Metal cruise	Amazon	1996	5.8	-47.9833	449.804	1.77222
Atlantic	Mason & Sullivan. 1999	Deep Sea Research II	DOI: 10.1016/S0967-0645(99)00010-7	YES	Third International Oceanographic Commission Baseline Trace Metal cruise	Amazon 2	1996	6.65	-48.8	4.39988	0.72406
Atlantic	Mason & Sullivan. 1999	Deep Sea Research II	DOI: 10.1016/S0967-0645(99)00010-7	YES	Third International Oceanographic Commission Baseline Trace Metal cruise	Amazon 2	1996	6.65	-48.8	14.3496	0.727822
Atlantic	Mason & Sullivan. 1999	Deep Sea Research II	DOI: 10.1016/S0967-0645(99)00010-7	YES	Third International Oceanographic Commission Baseline Trace Metal cruise	Amazon 2	1996	6.65	-48.8	23.7077	0.829198
Atlantic	Mason & Sullivan. 1999	Deep Sea Research II	DOI: 10.1016/S0967-0645(99)00010-7	YES	Third International Oceanographic Commission Baseline Trace Metal cruise	Amazon 2	1996	6.65	-48.8	34.4352	0.739329
Atlantic	Mason & Sullivan. 1999	Deep Sea Research II	DOI: 10.1016/S0967-0645(99)00010-7	YES	Third International Oceanographic Commission Baseline Trace Metal cruise	Amazon 2	1996	6.65	-48.8	65.0371	0.587369
Atlantic	Mason & Sullivan. 1999	Deep Sea Research II	DOI: 10.1016/S0967-0645(99)00010-7	YES	Third International Oceanographic Commission Baseline Trace Metal cruise	Amazon 2	1996	6.65	-48.8	249.31	0.924319
Atlantic	Mason et al. 2001	Deep Sea Research II	DOI: 10.1016/S0967-0645(01)00020-0	YES	RVWeatherbird	BATS Sep 1999	1999			2	0.495141
Atlantic	Mason et al. 2001	Deep Sea Research II	DOI: 10.1016/S0967-0645(01)00020-0	YES	RVWeatherbird	BATS Sep 1999	1999			13.8168	1.3101
Atlantic	Mason et al. 2001	Deep Sea Research II	DOI: 10.1016/S0967-0645(01)00020-0	YES	RVWeatherbird	BATS Sep 1999	1999			35.5334	1.43944
Atlantic	Mason et al. 2001	Deep Sea Research II	DOI: 10.1016/S0967-0645(01)00020-0	YES	RVWeatherbird	BATS Sep 1999	1999			54.5022	2.08298
Atlantic	Mason et al. 2001	Deep Sea Research II	DOI: 10.1016/S0967-0645(01)00020-0	YES	RVWeatherbird	BATS Sep 1999	1999			95.1719	0.870146
Atlantic	Mason et al. 2001	Deep Sea Research II	DOI: 10.1016/S0967-0645(01)00020-0	YES	RVWeatherbird	BATS Sep 1999	1999			148.238	0.314898
Atlantic	Mason et al. 2001	Deep Sea Research II	DOI: 10.1016/S0967-0645(01)00020-0	YES	RVWeatherbird	BATS Sep 1999	1999			297.881	1.39167
Atlantic	Mason et al. 2001	Deep Sea Research II	DOI: 10.1016/S0967-0645(01)00020-0	YES	RVWeatherbird	BATS Sep 1999	1999			395.41	2.1523
Atlantic	Mason et al. 2001	Deep Sea Research II	DOI: 10.1016/S0967-0645(01)00020-0	YES	RVWeatherbird	BATS Sep 1999	1999			495.312	6.74158
Atlantic	Mason et al. 2001	Deep Sea Research II	DOI: 10.1016/S0967-0645(01)00020-0	YES	RVWeatherbird	BATS Sep 1999	1999			593.107	5.25936
Atlantic	Mason et al. 2001	Deep Sea Research II	DOI: 10.1016/S0967-0645(01)00020-0	YES	RVWeatherbird	BATS Sep 1999	1999			3493	1.028
Atlantic	Mason et al. 2001	Deep Sea Research II	DOI: 10.1016/S0967-0645(01)00020-0	YES	RVWeatherbird	BATS Dec 1999	1999			2.37234	0.528138
Atlantic	Mason et al. 2001	Deep Sea Research II	DOI: 10.1016/S0967-0645(01)00020-0	YES	RVWeatherbird	BATS Dec 1999	1999			27.4803	2.14055
Atlantic	Mason et al. 2001	Deep Sea Research II	DOI: 10.1016/S0967-0645(01)00020-0	YES	RVWeatherbird	BATS Dec 1999	1999			63.8199	0.947614
Atlantic	Mason et al. 2001	Deep Sea Research II	DOI: 10.1016/S0967-0645(01)00020-0	YES	RVWeatherbird	BATS Dec 1999	1999			85.7387	2.08509
Atlantic	Mason et al. 2001	Deep Sea Research II	DOI: 10.1016/S0967-0645(01)00020-0	YES	RVWeatherbird	BATS Dec 1999	1999			98.8527	1.15031
Atlantic	Mason et al. 2001	Deep Sea Research II	DOI: 10.1016/S0967-0645(01)00020-0	YES	RVWeatherbird	BATS Dec 1999	1999			201.633	1.68638
Atlantic	Mason et al. 2001	Deep Sea Research II	DOI: 10.1016/S0967-0645(01)00020-0	YES	RVWeatherbird	BATS Dec 1999	1999			404.239	1.39151
Atlantic	Mason et al. 2001	Deep Sea Research II	DOI: 10.1016/S0967-0645(01)00020-0	YES	RVWeatherbird	BATS Dec 1999	1999			600.42	1.12519
Atlantic	Mason et al. 2001	Deep Sea Research II	DOI: 10.1016/S0967-0645(01)00020-0	YES	RVWeatherbird	BATS Dec 1999	1999			697.289	0.927235
Atlantic	Mason et al. 2001	Deep Sea Research II	DOI: 10.1016/S0967-0645(01)00020-0	YES	RVWeatherbird	BATS Dec 1999	1999			800.474	1.65037
Atlantic	Mason et al. 2001	Deep Sea Research II	DOI: 10.1016/S0967-0645(01)00020-0	YES	RVWeatherbird	BATS Mar 2000	2000			1.08108	0.971831
Atlantic	Mason et al. 2001	Deep Sea Research II	DOI: 10.1016/S0967-0645(01)00020-0	YES	RVWeatherbird	BATS Mar 2000	2000			24.8649	1.71831
Atlantic	Mason et al. 2001	Deep Sea Research II	DOI: 10.1016/S0967-0645(01)00020-0	YES	RVWeatherbird	BATS Mar 2000	2000			52.973	1.87324
Atlantic	Mason et al. 2001	Deep Sea Research II	DOI: 10.1016/S0967-0645(01)00020-0	YES	RVWeatherbird	BATS Mar 2000	2000			70.5634
Atlantic	Mason et al. 2001	Deep Sea Research II	DOI: 10.1016/S0967-0645(01)00020-0	YES	RVWeatherbird	BATS Mar 2000	2000			102.703	1.07042
Atlantic	Mason et al. 2001	Deep Sea Research II	DOI: 10.1016/S0967-0645(01)00020-0	YES	RVWeatherbird	BATS Mar 2000	2000			196.695
Atlantic	Mason et al. 2001	Deep Sea Research II	DOI: 10.1016/S0967-0645(01)00020-0	YES	RVWeatherbird	BATS Mar 2000	2000			299.459	1.25352
Atlantic	Mason et al. 2001	Deep Sea Research II	DOI: 10.1016/S0967-0645(01)00020-0	YES	RVWeatherbird	BATS Mar 2000	2000			496.216	1.25352
Atlantic	Mason et al. 2001	Deep Sea Research II	DOI: 10.1016/S0967-0645(01)00020-0	YES	RVWeatherbird	BATS Mar 2000	2000			692.973	1.12676
Atlantic	Mason et al. 2001	Deep Sea Research II	DOI: 10.1016/S0967-0645(01)00020-0	YES	RVWeatherbird	BATS Mar 2000	2000			900.541	3.77465
Atlantic	Mason et al. 2001	Deep Sea Research II	DOI: 10.1016/S0967-0645(01)00020-0	YES	RVWeatherbird	BATS Mar 2000	2000			1200.78	0.605634
Atlantic	Mason et al. 2001	Deep Sea Research II	DOI: 10.1016/S0967-0645(01)00020-0	YES	RVWeatherbird	BATS Mar 2000	2000			1487.43	0.929577
Atlantic	Mason et al. 2001	Deep Sea Research II	DOI: 10.1016/S0967-0645(01)00020-0	YES	RVWeatherbird	BATS Mar 2000	2000			1664.19	0.295775
Atlantic	Mason et al. 2001	Deep Sea Research II	DOI: 10.1016/S0967-0645(01)00020-0	YES	RVWeatherbird	BATS Mar 2000	2000			1976.56	0.929577
Atlantic	Mason et al. 2001	Deep Sea Research II	DOI: 10.1016/S0967-0645(01)00020-0	YES	RVWeatherbird	BATS Mar 2000	2000			2283.76	0.295775
Atlantic	Mason et al. 2001	Deep Sea Research II	DOI: 10.1016/S0967-0645(01)00020-0	YES	RVWeatherbird	BATS Mar 2000	2000			2587.8	0.887324
Atlantic	Mason et al. 2001	Deep Sea Research II	DOI: 10.1016/S0967-0645(01)00020-0	YES	RVWeatherbird	BATS Mar 2000	2000			2988	1.07042
Atlantic	Mason et al. 2001	Deep Sea Research II	DOI: 10.1016/S0967-0645(01)00020-0	YES	RVWeatherbird	BATS Mar 2000	2000			3410.13	0.633803
Atlantic	Pohl et al. 2011	Journal of Marine Systems	DOI: 10.1016/j.jmarsys.2010.08.003	YES	GEOTRACES ANT XXIII/1	1	2005	45.85	354.01	2
Atlantic	Pohl et al. 2011	Journal of Marine Systems	DOI: 10.1016/j.jmarsys.2010.08.004	YES	GEOTRACES ANT XXIII/1	2	2005	45.87	355.42	2	0.78768
Atlantic	Pohl et al. 2011	Journal of Marine Systems	DOI: 10.1016/j.jmarsys.2010.08.005	YES	GEOTRACES ANT XXIII/1	5	2005	36.09	347.08	2	1.16157
Atlantic	Pohl et al. 2011	Journal of Marine Systems	DOI: 10.1016/j.jmarsys.2010.08.006	YES	GEOTRACES ANT XXIII/1	6	2005	34.13	345.85	2	1.5255
Atlantic	Pohl et al. 2011	Journal of Marine Systems	DOI: 10.1016/j.jmarsys.2010.08.007	YES	GEOTRACES ANT XXIII/1	7	2005	33.37	345.38	2	1.81465
Atlantic	Pohl et al. 2011	Journal of Marine Systems	DOI: 10.1016/j.jmarsys.2010.08.008	YES	GEOTRACES ANT XXIII/1	8	2005	32.33	344.75	2	1.51054
Atlantic	Pohl et al. 2011	Journal of Marine Systems	DOI: 10.1016/j.jmarsys.2010.08.009	YES	GEOTRACES ANT XXIII/1	9	2005	30.27	343.51	2	2.77681
Atlantic	Pohl et al. 2011	Journal of Marine Systems	DOI: 10.1016/j.jmarsys.2010.08.010	YES	GEOTRACES ANT XXIII/1	11	2005	26.04	342.71	2	1.11671
Atlantic	Pohl et al. 2011	Journal of Marine Systems	DOI: 10.1016/j.jmarsys.2010.08.011	YES	GEOTRACES ANT XXIII/1	12	2005	25.37	341.96	2	0.97213
Atlantic	Pohl et al. 2011	Journal of Marine Systems	DOI: 10.1016/j.jmarsys.2010.08.012	YES	GEOTRACES ANT XXIII/1	13	2005	24.4	340.92	2	0.65806
Atlantic	Pohl et al. 2011	Journal of Marine Systems	DOI: 10.1016/j.jmarsys.2010.08.013	YES	GEOTRACES ANT XXIII/1	14	2005	22.7	339.66	2	0.68797
Atlantic	Pohl et al. 2011	Journal of Marine Systems	DOI: 10.1016/j.jmarsys.2010.08.014	YES	GEOTRACES ANT XXIII/1	15	2005	21.37	339.14	2	3.88853
Atlantic	Pohl et al. 2011	Journal of Marine Systems	DOI: 10.1016/j.jmarsys.2010.08.015	YES	GEOTRACES ANT XXIII/1	16	2005	20.33	339.12	2	2.24837
Atlantic	Pohl et al. 2011	Journal of Marine Systems	DOI: 10.1016/j.jmarsys.2010.08.016	YES	GEOTRACES ANT XXIII/1	17	2005	18.96	339.09	2	3.0859
Atlantic	Pohl et al. 2011	Journal of Marine Systems	DOI: 10.1016/j.jmarsys.2010.08.017	YES	GEOTRACES ANT XXIII/1	18	2005	18.17	339.07	2	3.56448
Atlantic	Pohl et al. 2011	Journal of Marine Systems	DOI: 10.1016/j.jmarsys.2010.08.018	YES	GEOTRACES ANT XXIII/1	19	2005	17.28	339.06	2	2.16362
Atlantic	Pohl et al. 2011	Journal of Marine Systems	DOI: 10.1016/j.jmarsys.2010.08.019	YES	GEOTRACES ANT XXIII/1	20	2005	15.69	339.02	2	3.29029
Atlantic	Pohl et al. 2011	Journal of Marine Systems	DOI: 10.1016/j.jmarsys.2010.08.020	YES	GEOTRACES ANT XXIII/1	21	2005	14.45	339.07	2	2.36303
Atlantic	Pohl et al. 2011	Journal of Marine Systems	DOI: 10.1016/j.jmarsys.2010.08.021	YES	GEOTRACES ANT XXIII/1	22	2005	13.68	339.23	2	1.89441
Atlantic	Pohl et al. 2011	Journal of Marine Systems	DOI: 10.1016/j.jmarsys.2010.08.022	YES	GEOTRACES ANT XXIII/1	23	2005	12.4	339.5	2	2.02901
Atlantic	Pohl et al. 2011	Journal of Marine Systems	DOI: 10.1016/j.jmarsys.2010.08.023	YES	GEOTRACES ANT XXIII/1	24	2005	11.39	339.71	2	2.5774
Atlantic	Pohl et al. 2011	Journal of Marine Systems	DOI: 10.1016/j.jmarsys.2010.08.024	YES	GEOTRACES ANT XXIII/1	25	2005	10.41	339.92	2	3.33516
Atlantic	Pohl et al. 2011	Journal of Marine Systems	DOI: 10.1016/j.jmarsys.2010.08.025	YES	GEOTRACES ANT XXIII/1	26	2005	9.29	340.6	2	3.49469
Atlantic	Pohl et al. 2011	Journal of Marine Systems	DOI: 10.1016/j.jmarsys.2010.08.026	YES	GEOTRACES ANT XXIII/1	27	2005	8.5	341.27	2	3.34015
Atlantic	Pohl et al. 2011	Journal of Marine Systems	DOI: 10.1016/j.jmarsys.2010.08.027	YES	GEOTRACES ANT XXIII/1	28	2005	7.47	342.13	2	3.32519
Atlantic	Pohl et al. 2011	Journal of Marine Systems	DOI: 10.1016/j.jmarsys.2010.08.028	YES	GEOTRACES ANT XXIII/1	29	2005	6.97	342.56	2	2.36303
Atlantic	Pohl et al. 2011	Journal of Marine Systems	DOI: 10.1016/j.jmarsys.2010.08.029	YES	GEOTRACES ANT XXIII/1	30	2005	6.02	343.34	2	2.98121
Atlantic	Pohl et al. 2011	Journal of Marine Systems	DOI: 10.1016/j.jmarsys.2010.08.030	YES	GEOTRACES ANT XXIII/1	31	2005	5.33	343.92	2	2.89646
Atlantic	Pohl et al. 2011	Journal of Marine Systems	DOI: 10.1016/j.jmarsys.2010.08.031	YES	GEOTRACES ANT XXIII/1	32	2005	4.17	344.88	2	3.64425
Atlantic	Pohl et al. 2011	Journal of Marine Systems	DOI: 10.1016/j.jmarsys.2010.08.032	YES	GEOTRACES ANT XXIII/1	33	2005	3.51	345.44	2	2.90144
Atlantic	Pohl et al. 2011	Journal of Marine Systems	DOI: 10.1016/j.jmarsys.2010.08.033	YES	GEOTRACES ANT XXIII/1	34	2005	2.48	346.27	2	1.51054
Atlantic	Pohl et al. 2011	Journal of Marine Systems	DOI: 10.1016/j.jmarsys.2010.08.034	YES	GEOTRACES ANT XXIII/1	35	2005	0.51	347.8	2	4.30729
Atlantic	Pohl et al. 2011	Journal of Marine Systems	DOI: 10.1016/j.jmarsys.2010.08.035	YES	GEOTRACES ANT XXIII/1	36	2005	0.1	348.12	2	2.30819
Atlantic	Pohl et al. 2011	Journal of Marine Systems	DOI: 10.1016/j.jmarsys.2010.08.036	YES	GEOTRACES ANT XXIII/1	PS69/018-6	2005	-0.66	348.74	20	2.47
Atlantic	Pohl et al. 2011	Journal of Marine Systems	DOI: 10.1016/j.jmarsys.2010.08.037	YES	GEOTRACES ANT XXIII/1	PS69/018-6	2005	-0.66	348.74	40	1.8
Atlantic	Pohl et al. 2011	Journal of Marine Systems	DOI: 10.1016/j.jmarsys.2010.08.038	YES	GEOTRACES ANT XXIII/1	PS69/018-6	2005	-0.66	348.74	60	1.61
Atlantic	Pohl et al. 2011	Journal of Marine Systems	DOI: 10.1016/j.jmarsys.2010.08.039	YES	GEOTRACES ANT XXIII/1	PS69/018-6	2005	-0.66	348.74	80	4.9
Atlantic	Pohl et al. 2011	Journal of Marine Systems	DOI: 10.1016/j.jmarsys.2010.08.040	YES	GEOTRACES ANT XXIII/1	PS69/018-6	2005	-0.66	348.74	100	1.72
Atlantic	Pohl et al. 2011	Journal of Marine Systems	DOI: 10.1016/j.jmarsys.2010.08.041	YES	GEOTRACES ANT XXIII/1	PS69/018-6	2005	-0.66	348.74	140	1.61
Atlantic	Pohl et al. 2011	Journal of Marine Systems	DOI: 10.1016/j.jmarsys.2010.08.042	YES	GEOTRACES ANT XXIII/1	PS69/018-6	2005	-0.66	348.74	200	1.7
Atlantic	Pohl et al. 2011	Journal of Marine Systems	DOI: 10.1016/j.jmarsys.2010.08.043	YES	GEOTRACES ANT XXIII/1	PS69/018-6	2005	-0.66	348.74	260	1.59
Atlantic	Pohl et al. 2011	Journal of Marine Systems	DOI: 10.1016/j.jmarsys.2010.08.044	YES	GEOTRACES ANT XXIII/1	PS69/018-6	2005	-0.66	348.74	300	1.87
Atlantic	Pohl et al. 2011	Journal of Marine Systems	DOI: 10.1016/j.jmarsys.2010.08.045	YES	GEOTRACES ANT XXIII/1	PS69/018-6	2005	-0.66	348.74	400	2.04
Atlantic	Pohl et al. 2011	Journal of Marine Systems	DOI: 10.1016/j.jmarsys.2010.08.046	YES	GEOTRACES ANT XXIII/1	PS69/018-6	2005	-0.66	348.74	500	1.91
Atlantic	Pohl et al. 2011	Journal of Marine Systems	DOI: 10.1016/j.jmarsys.2010.08.047	YES	GEOTRACES ANT XXIII/1	PS69/018-6	2005	-0.66	348.74	780	1.68
Atlantic	Pohl et al. 2011	Journal of Marine Systems	DOI: 10.1016/j.jmarsys.2010.08.048	YES	GEOTRACES ANT XXIII/1	PS69/018-6	2005	-0.66	348.74	1000	1.39
Atlantic	Pohl et al. 2011	Journal of Marine Systems	DOI: 10.1016/j.jmarsys.2010.08.049	YES	GEOTRACES ANT XXIII/1	PS69/018-6	2005	-0.66	348.74	2000	1.28
Atlantic	Pohl et al. 2011	Journal of Marine Systems	DOI: 10.1016/j.jmarsys.2010.08.050	YES	GEOTRACES ANT XXIII/1	PS69/018-6	2005	-0.66	348.74	3000	1.36
Atlantic	Pohl et al. 2011	Journal of Marine Systems	DOI: 10.1016/j.jmarsys.2010.08.051	YES	GEOTRACES ANT XXIII/1	PS69/018-6	2005	-0.66	348.74	3822	1.41
Atlantic	Pohl et al. 2011	Journal of Marine Systems	DOI: 10.1016/j.jmarsys.2010.08.052	YES	GEOTRACES ANT XXIII/1	37	2005	-1.81	349.61	2	0.74281
Atlantic	Pohl et al. 2011	Journal of Marine Systems	DOI: 10.1016/j.jmarsys.2010.08.053	YES	GEOTRACES ANT XXIII/1	38	2005	-3.3	350.77	2	0.85249
Atlantic	Pohl et al. 2011	Journal of Marine Systems	DOI: 10.1016/j.jmarsys.2010.08.054	YES	GEOTRACES ANT XXIII/1	39	2005	-4.92	352.03	2	0.58826
Atlantic	Pohl et al. 2011	Journal of Marine Systems	DOI: 10.1016/j.jmarsys.2010.08.055	YES	GEOTRACES ANT XXIII/1	40	2005	-8.48	354.82	2	0.98709
Atlantic	Pohl et al. 2011	Journal of Marine Systems	DOI: 10.1016/j.jmarsys.2010.08.056	YES	GEOTRACES ANT XXIII/1	41	2005	-8.98	355.22	2	0.98709
Atlantic	Pohl et al. 2011	Journal of Marine Systems	DOI: 10.1016/j.jmarsys.2010.08.057	YES	GEOTRACES ANT XXIII/1	42	2005	-9.78	355.84	2	0.90732
Atlantic	Pohl et al. 2011	Journal of Marine Systems	DOI: 10.1016/j.jmarsys.2010.08.058	YES	GEOTRACES ANT XXIII/1	43	2005	-11.66	357.33	2	0.62316
Atlantic	Pohl et al. 2011	Journal of Marine Systems	DOI: 10.1016/j.jmarsys.2010.08.059	YES	GEOTRACES ANT XXIII/1	44	2005	-12.07	357.65	2	0.45865
Atlantic	Pohl et al. 2011	Journal of Marine Systems	DOI: 10.1016/j.jmarsys.2010.08.060	YES	GEOTRACES ANT XXIII/1	45	2005	-13.89	359.11	2	0.46862
Atlantic	Pohl et al. 2011	Journal of Marine Systems	DOI: 10.1016/j.jmarsys.2010.08.061	YES	GEOTRACES ANT XXIII/1	46	2005	-14.61	359.69	2	0.83254
Atlantic	Pohl et al. 2011	Journal of Marine Systems	DOI: 10.1016/j.jmarsys.2010.08.062	YES	GEOTRACES ANT XXIII/1	47	2005	-15.47	0.37	2	0.5085
Atlantic	Pohl et al. 2011	Journal of Marine Systems	DOI: 10.1016/j.jmarsys.2010.08.063	YES	GEOTRACES ANT XXIII/1	49	2005	-17.96	2.39	2	1.66509
Atlantic	Pohl et al. 2011	Journal of Marine Systems	DOI: 10.1016/j.jmarsys.2010.08.064	YES	GEOTRACES ANT XXIII/1	50	2005	-18.85	3.12	2	1.68004
Atlantic	Pohl et al. 2011	Journal of Marine Systems	DOI: 10.1016/j.jmarsys.2010.08.065	YES	GEOTRACES ANT XXIII/1	51	2005	-20.69	4.64	2	0.89237
Atlantic	Pohl et al. 2011	Journal of Marine Systems	DOI: 10.1016/j.jmarsys.2010.08.066	YES	GEOTRACES ANT XXIII/1	52	2005	-21.3	5.15	2	0.70293
Atlantic	Pohl et al. 2011	Journal of Marine Systems	DOI: 10.1016/j.jmarsys.2010.08.067	YES	GEOTRACES ANT XXIII/1	53	2005	-22.2	5.91	2	1.40585
Atlantic	Bowman et al. 2015	Deep Sea Research II	DOI: 10.1016/j.dsr2.2014.07.004	YES	GEOTRACES GA03 KN199-4 (US)	1	2010	38.3241	-9.6601	2
Atlantic	Bowman et al. 2015	Deep Sea Research II	DOI: 10.1016/j.dsr2.2014.07.005	YES	GEOTRACES GA03 KN199-4 (US)	1	2010	38.3241	-9.6601	23.9	2.94
Atlantic	Bowman et al. 2015	Deep Sea Research II	DOI: 10.1016/j.dsr2.2014.07.006	YES	GEOTRACES GA03 KN199-4 (US)	1	2010	38.3241	-9.6601	34.7	2.01
Atlantic	Bowman et al. 2015	Deep Sea Research II	DOI: 10.1016/j.dsr2.2014.07.007	YES	GEOTRACES GA03 KN199-4 (US)	1	2010	38.3241	-9.6601	39.6	1.65
Atlantic	Bowman et al. 2015	Deep Sea Research II	DOI: 10.1016/j.dsr2.2014.07.008	YES	GEOTRACES GA03 KN199-4 (US)	1	2010	38.3241	-9.6601	68	1.01
Atlantic	Bowman et al. 2015	Deep Sea Research II	DOI: 10.1016/j.dsr2.2014.07.009	YES	GEOTRACES GA03 KN199-4 (US)	1	2010	38.3241	-9.6601	135.5	2.17
Atlantic	Bowman et al. 2015	Deep Sea Research II	DOI: 10.1016/j.dsr2.2014.07.010	YES	GEOTRACES GA03 KN199-4 (US)	1	2010	38.3241	-9.6601	199.3	1.75
Atlantic	Bowman et al. 2015	Deep Sea Research II	DOI: 10.1016/j.dsr2.2014.07.011	YES	GEOTRACES GA03 KN199-4 (US)	1	2010	38.3241	-9.6601	300.2	2.33
Atlantic	Bowman et al. 2015	Deep Sea Research II	DOI: 10.1016/j.dsr2.2014.07.012	YES	GEOTRACES GA03 KN199-4 (US)	1	2010	38.3241	-9.6601	400.7	2.2
Atlantic	Bowman et al. 2015	Deep Sea Research II	DOI: 10.1016/j.dsr2.2014.07.013	YES	GEOTRACES GA03 KN199-4 (US)	1	2010	38.3241	-9.6601	501.9	0.96
Atlantic	Bowman et al. 2015	Deep Sea Research II	DOI: 10.1016/j.dsr2.2014.07.014	YES	GEOTRACES GA03 KN199-4 (US)	1	2010	38.3241	-9.6601	642.1	2.55
Atlantic	Bowman et al. 2015	Deep Sea Research II	DOI: 10.1016/j.dsr2.2014.07.015	YES	GEOTRACES GA03 KN199-4 (US)	1	2010	38.3241	-9.6601	776.7	1.52
Atlantic	Bowman et al. 2015	Deep Sea Research II	DOI: 10.1016/j.dsr2.2014.07.016	YES	GEOTRACES GA03 KN199-4 (US)	1	2010	38.3241	-9.6601	876.4	1.78
Atlantic	Bowman et al. 2015	Deep Sea Research II	DOI: 10.1016/j.dsr2.2014.07.017	YES	GEOTRACES GA03 KN199-4 (US)	1	2010	38.3281	-9.6603	900.2	1.61
Atlantic	Bowman et al. 2015	Deep Sea Research II	DOI: 10.1016/j.dsr2.2014.07.018	YES	GEOTRACES GA03 KN199-4 (US)	1	2010	38.3281	-9.6603	990.3	1.83
Atlantic	Bowman et al. 2015	Deep Sea Research II	DOI: 10.1016/j.dsr2.2014.07.019	YES	GEOTRACES GA03 KN199-4 (US)	1	2010	38.3281	-9.6603	1150.3
Atlantic	Bowman et al. 2015	Deep Sea Research II	DOI: 10.1016/j.dsr2.2014.07.020	YES	GEOTRACES GA03 KN199-4 (US)	1	2010	38.3281	-9.6603	1293.3	1.54
Atlantic	Bowman et al. 2015	Deep Sea Research II	DOI: 10.1016/j.dsr2.2014.07.021	YES	GEOTRACES GA03 KN199-4 (US)	1	2010	38.3281	-9.6603	1480.1
Atlantic	Bowman et al. 2015	Deep Sea Research II	DOI: 10.1016/j.dsr2.2014.07.022	YES	GEOTRACES GA03 KN199-4 (US)	1	2010	38.3281	-9.6603	1700.7
Atlantic	Bowman et al. 2015	Deep Sea Research II	DOI: 10.1016/j.dsr2.2014.07.023	YES	GEOTRACES GA03 KN199-4 (US)	1	2010	38.3281	-9.6603	1900.6
Atlantic	Bowman et al. 2015	Deep Sea Research II	DOI: 10.1016/j.dsr2.2014.07.024	YES	GEOTRACES GA03 KN199-4 (US)	1	2010	38.3281	-9.6603	2101	1.92
Atlantic	Bowman et al. 2015	Deep Sea Research II	DOI: 10.1016/j.dsr2.2014.07.025	YES	GEOTRACES GA03 KN199-4 (US)	1	2010	38.3281	-9.6603	2300.6	2.54
Atlantic	Bowman et al. 2015	Deep Sea Research II	DOI: 10.1016/j.dsr2.2014.07.026	YES	GEOTRACES GA03 KN199-4 (US)	1	2010	38.3281	-9.6603	2500.9
Atlantic	Bowman et al. 2015	Deep Sea Research II	DOI: 10.1016/j.dsr2.2014.07.027	YES	GEOTRACES GA03 KN199-4 (US)	1	2010	38.3281	-9.6603	2601	0.67
Atlantic	Bowman et al. 2015	Deep Sea Research II	DOI: 10.1016/j.dsr2.2014.07.028	YES	GEOTRACES GA03 KN199-4 (US)	1	2010	38.3281	-9.6603	2700.7	1.27
Atlantic	Bowman et al. 2015	Deep Sea Research II	DOI: 10.1016/j.dsr2.2014.07.029	YES	GEOTRACES GA03 KN199-4 (US)	2	2010	36.7622	-12.8313	2
Atlantic	Bowman et al. 2015	Deep Sea Research II	DOI: 10.1016/j.dsr2.2014.07.030	YES	GEOTRACES GA03 KN199-4 (US)	2	2010	36.7622	-12.8313	48.9
Atlantic	Bowman et al. 2015	Deep Sea Research II	DOI: 10.1016/j.dsr2.2014.07.031	YES	GEOTRACES GA03 KN199-4 (US)	2	2010	36.7622	-12.8313	102.3
Atlantic	Bowman et al. 2015	Deep Sea Research II	DOI: 10.1016/j.dsr2.2014.07.032	YES	GEOTRACES GA03 KN199-4 (US)	2	2010	36.7622	-12.8313	140.6
Atlantic	Bowman et al. 2015	Deep Sea Research II	DOI: 10.1016/j.dsr2.2014.07.033	YES	GEOTRACES GA03 KN199-4 (US)	2	2010	36.7622	-12.8313	200.9
Atlantic	Bowman et al. 2015	Deep Sea Research II	DOI: 10.1016/j.dsr2.2014.07.034	YES	GEOTRACES GA03 KN199-4 (US)	2	2010	36.7622	-12.8313	250.8
Atlantic	Bowman et al. 2015	Deep Sea Research II	DOI: 10.1016/j.dsr2.2014.07.035	YES	GEOTRACES GA03 KN199-4 (US)	2	2010	36.7622	-12.8313	359.2
Atlantic	Bowman et al. 2015	Deep Sea Research II	DOI: 10.1016/j.dsr2.2014.07.036	YES	GEOTRACES GA03 KN199-4 (US)	2	2010	36.7622	-12.8313	501.3
Atlantic	Bowman et al. 2015	Deep Sea Research II	DOI: 10.1016/j.dsr2.2014.07.037	YES	GEOTRACES GA03 KN199-4 (US)	2	2010	36.7622	-12.8313	661.5
Atlantic	Bowman et al. 2015	Deep Sea Research II	DOI: 10.1016/j.dsr2.2014.07.038	YES	GEOTRACES GA03 KN199-4 (US)	2	2010	36.7622	-12.8313	821
Atlantic	Bowman et al. 2015	Deep Sea Research II	DOI: 10.1016/j.dsr2.2014.07.039	YES	GEOTRACES GA03 KN199-4 (US)	2	2010	36.7622	-12.8313	902.3
Atlantic	Bowman et al. 2015	Deep Sea Research II	DOI: 10.1016/j.dsr2.2014.07.040	YES	GEOTRACES GA03 KN199-4 (US)	2	2010	36.7622	-12.8313	1050.9
Atlantic	Bowman et al. 2015	Deep Sea Research II	DOI: 10.1016/j.dsr2.2014.07.041	YES	GEOTRACES GA03 KN199-4 (US)	2	2010	36.7622	-12.8313	1201.4
Atlantic	Bowman et al. 2015	Deep Sea Research II	DOI: 10.1016/j.dsr2.2014.07.042	YES	GEOTRACES GA03 KN199-4 (US)	3	2010	35.2013	-16.0032	2	0.1194
Atlantic	Bowman et al. 2015	Deep Sea Research II	DOI: 10.1016/j.dsr2.2014.07.043	YES	GEOTRACES GA03 KN199-4 (US)	3	2010	35.2013	-16.0032	35.3	0.57
Atlantic	Bowman et al. 2015	Deep Sea Research II	DOI: 10.1016/j.dsr2.2014.07.044	YES	GEOTRACES GA03 KN199-4 (US)	3	2010	35.2013	-16.0032	50.5
Atlantic	Bowman et al. 2015	Deep Sea Research II	DOI: 10.1016/j.dsr2.2014.07.045	YES	GEOTRACES GA03 KN199-4 (US)	3	2010	35.2013	-16.0032	76.5	0.5
Atlantic	Bowman et al. 2015	Deep Sea Research II	DOI: 10.1016/j.dsr2.2014.07.046	YES	GEOTRACES GA03 KN199-4 (US)	3	2010	35.2013	-16.0032	99.5	0.2
Atlantic	Bowman et al. 2015	Deep Sea Research II	DOI: 10.1016/j.dsr2.2014.07.047	YES	GEOTRACES GA03 KN199-4 (US)	3	2010	35.2013	-16.0032	135.9	0.43
Atlantic	Bowman et al. 2015	Deep Sea Research II	DOI: 10.1016/j.dsr2.2014.07.048	YES	GEOTRACES GA03 KN199-4 (US)	3	2010	35.2013	-16.0032	191.1	0.55
Atlantic	Bowman et al. 2015	Deep Sea Research II	DOI: 10.1016/j.dsr2.2014.07.049	YES	GEOTRACES GA03 KN199-4 (US)	3	2010	35.2013	-16.0032	300.7	0.29
Atlantic	Bowman et al. 2015	Deep Sea Research II	DOI: 10.1016/j.dsr2.2014.07.050	YES	GEOTRACES GA03 KN199-4 (US)	3	2010	35.2013	-16.0032	400.5	0.64
Atlantic	Bowman et al. 2015	Deep Sea Research II	DOI: 10.1016/j.dsr2.2014.07.051	YES	GEOTRACES GA03 KN199-4 (US)	3	2010	35.2013	-16.0032	489.8	0.04	0.110235
Atlantic	Bowman et al. 2015	Deep Sea Research II	DOI: 10.1016/j.dsr2.2014.07.052	YES	GEOTRACES GA03 KN199-4 (US)	3	2010	35.2013	-16.0032	610.7
Atlantic	Bowman et al. 2015	Deep Sea Research II	DOI: 10.1016/j.dsr2.2014.07.053	YES	GEOTRACES GA03 KN199-4 (US)	3	2010	35.2013	-16.0032	776.5	1.74
Atlantic	Bowman et al. 2015	Deep Sea Research II	DOI: 10.1016/j.dsr2.2014.07.054	YES	GEOTRACES GA03 KN199-4 (US)	3	2010	35.2013	-16.0032	875.8	0.38
Atlantic	Bowman et al. 2015	Deep Sea Research II	DOI: 10.1016/j.dsr2.2014.07.055	YES	GEOTRACES GA03 KN199-4 (US)	3	2010	35.2013	-15.9965	993.8	0.17	0.146268
Atlantic	Bowman et al. 2015	Deep Sea Research II	DOI: 10.1016/j.dsr2.2014.07.056	YES	GEOTRACES GA03 KN199-4 (US)	3	2010	35.2013	-15.9965	1050.6	0.8	0.0944709
Atlantic	Bowman et al. 2015	Deep Sea Research II	DOI: 10.1016/j.dsr2.2014.07.057	YES	GEOTRACES GA03 KN199-4 (US)	3	2010	35.2013	-15.9965	1200.5	0.86
Atlantic	Bowman et al. 2015	Deep Sea Research II	DOI: 10.1016/j.dsr2.2014.07.058	YES	GEOTRACES GA03 KN199-4 (US)	3	2010	35.2013	-15.9965	1350.5	0.21	0.0654697
Atlantic	Bowman et al. 2015	Deep Sea Research II	DOI: 10.1016/j.dsr2.2014.07.059	YES	GEOTRACES GA03 KN199-4 (US)	3	2010	35.2013	-15.9965	1500.8	0.08
Atlantic	Bowman et al. 2015	Deep Sea Research II	DOI: 10.1016/j.dsr2.2014.07.060	YES	GEOTRACES GA03 KN199-4 (US)	3	2010	35.2013	-15.9965	1700.7	0.94
Atlantic	Bowman et al. 2015	Deep Sea Research II	DOI: 10.1016/j.dsr2.2014.07.061	YES	GEOTRACES GA03 KN199-4 (US)	3	2010	35.2013	-15.9965	1900.6	0.89
Atlantic	Bowman et al. 2015	Deep Sea Research II	DOI: 10.1016/j.dsr2.2014.07.062	YES	GEOTRACES GA03 KN199-4 (US)	3	2010	35.2013	-15.9965	2101.2	0.65
Atlantic	Bowman et al. 2015	Deep Sea Research II	DOI: 10.1016/j.dsr2.2014.07.063	YES	GEOTRACES GA03 KN199-4 (US)	3	2010	35.2013	-15.9965	2300.3	0.62
Atlantic	Bowman et al. 2015	Deep Sea Research II	DOI: 10.1016/j.dsr2.2014.07.064	YES	GEOTRACES GA03 KN199-4 (US)	3	2010	35.2013	-15.9965	2501.2	0.22
Atlantic	Bowman et al. 2015	Deep Sea Research II	DOI: 10.1016/j.dsr2.2014.07.065	YES	GEOTRACES GA03 KN199-4 (US)	3	2010	35.2013	-15.9965	2600.6	0.3
Atlantic	Bowman et al. 2015	Deep Sea Research II	DOI: 10.1016/j.dsr2.2014.07.066	YES	GEOTRACES GA03 KN199-4 (US)	3	2010	35.2013	-15.9965	2680.9	0.86
Atlantic	Bowman et al. 2015	Deep Sea Research II	DOI: 10.1016/j.dsr2.2014.07.067	YES	GEOTRACES GA03 KN199-4 (US)	5	2010	31.0021	-21.9998	2	0.2994
Atlantic	Bowman et al. 2015	Deep Sea Research II	DOI: 10.1016/j.dsr2.2014.07.068	YES	GEOTRACES GA03 KN199-4 (US)	5	2010	31.0021	-21.9998	30.7	1.18
Atlantic	Bowman et al. 2015	Deep Sea Research II	DOI: 10.1016/j.dsr2.2014.07.069	YES	GEOTRACES GA03 KN199-4 (US)	5	2010	31.0021	-21.9998	51.5	0.59
Atlantic	Bowman et al. 2015	Deep Sea Research II	DOI: 10.1016/j.dsr2.2014.07.070	YES	GEOTRACES GA03 KN199-4 (US)	5	2010	31.0021	-21.9998	80.9	0.39
Atlantic	Bowman et al. 2015	Deep Sea Research II	DOI: 10.1016/j.dsr2.2014.07.071	YES	GEOTRACES GA03 KN199-4 (US)	5	2010	31.0021	-21.9998	101.3	0.43
Atlantic	Bowman et al. 2015	Deep Sea Research II	DOI: 10.1016/j.dsr2.2014.07.072	YES	GEOTRACES GA03 KN199-4 (US)	5	2010	31.0021	-21.9998	135.6	0.55
Atlantic	Bowman et al. 2015	Deep Sea Research II	DOI: 10.1016/j.dsr2.2014.07.073	YES	GEOTRACES GA03 KN199-4 (US)	5	2010	31.0021	-21.9998	186.8	0.61
Atlantic	Bowman et al. 2015	Deep Sea Research II	DOI: 10.1016/j.dsr2.2014.07.074	YES	GEOTRACES GA03 KN199-4 (US)	5	2010	31.0021	-21.9998	251.1	0.62
Atlantic	Bowman et al. 2015	Deep Sea Research II	DOI: 10.1016/j.dsr2.2014.07.075	YES	GEOTRACES GA03 KN199-4 (US)	5	2010	31.0021	-21.9998	350.6	0.59
Atlantic	Bowman et al. 2015	Deep Sea Research II	DOI: 10.1016/j.dsr2.2014.07.076	YES	GEOTRACES GA03 KN199-4 (US)	5	2010	31.0021	-21.9998	553	0.71
Atlantic	Bowman et al. 2015	Deep Sea Research II	DOI: 10.1016/j.dsr2.2014.07.077	YES	GEOTRACES GA03 KN199-4 (US)	5	2010	31.0021	-21.9998	802.1	0.98
Atlantic	Bowman et al. 2015	Deep Sea Research II	DOI: 10.1016/j.dsr2.2014.07.078	YES	GEOTRACES GA03 KN199-4 (US)	5	2010	31.0021	-21.9998	962.8	0.87
Atlantic	Bowman et al. 2015	Deep Sea Research II	DOI: 10.1016/j.dsr2.2014.07.079	YES	GEOTRACES GA03 KN199-4 (US)	5	2010	31.0021	-21.9998	1201.8	0.68
Atlantic	Bowman et al. 2015	Deep Sea Research II	DOI: 10.1016/j.dsr2.2014.07.080	YES	GEOTRACES GA03 KN199-4 (US)	5	2010	31.0055	-22.0037	1500.9	0.78
Atlantic	Bowman et al. 2015	Deep Sea Research II	DOI: 10.1016/j.dsr2.2014.07.081	YES	GEOTRACES GA03 KN199-4 (US)	5	2010	31.0055	-22.0037	1800.3	0.89	0.0934299
Atlantic	Bowman et al. 2015	Deep Sea Research II	DOI: 10.1016/j.dsr2.2014.07.082	YES	GEOTRACES GA03 KN199-4 (US)	5	2010	31.0055	-22.0037	2100.3	0.79
Atlantic	Bowman et al. 2015	Deep Sea Research II	DOI: 10.1016/j.dsr2.2014.07.083	YES	GEOTRACES GA03 KN199-4 (US)	5	2010	31.0055	-22.0037	2400.8	0.88
Atlantic	Bowman et al. 2015	Deep Sea Research II	DOI: 10.1016/j.dsr2.2014.07.084	YES	GEOTRACES GA03 KN199-4 (US)	5	2010	31.0055	-22.0037	2700.6	0.91
Atlantic	Bowman et al. 2015	Deep Sea Research II	DOI: 10.1016/j.dsr2.2014.07.085	YES	GEOTRACES GA03 KN199-4 (US)	5	2010	31.0055	-22.0037	3000.6	0.93
Atlantic	Bowman et al. 2015	Deep Sea Research II	DOI: 10.1016/j.dsr2.2014.07.086	YES	GEOTRACES GA03 KN199-4 (US)	5	2010	31.0055	-22.0037	3301	0.91	0.322307
Atlantic	Bowman et al. 2015	Deep Sea Research II	DOI: 10.1016/j.dsr2.2014.07.087	YES	GEOTRACES GA03 KN199-4 (US)	5	2010	31.0055	-22.0037	3600.1	0.88	0.225166
Atlantic	Bowman et al. 2015	Deep Sea Research II	DOI: 10.1016/j.dsr2.2014.07.088	YES	GEOTRACES GA03 KN199-4 (US)	5	2010	31.0055	-22.0037	3899.2	1.01	0.214824
Atlantic	Bowman et al. 2015	Deep Sea Research II	DOI: 10.1016/j.dsr2.2014.07.089	YES	GEOTRACES GA03 KN199-4 (US)	5	2010	31.0055	-22.0037	4199.1	0.93
Atlantic	Bowman et al. 2015	Deep Sea Research II	DOI: 10.1016/j.dsr2.2014.07.090	YES	GEOTRACES GA03 KN199-4 (US)	5	2010	31.0055	-22.0037	4548.7	0.87
Atlantic	Bowman et al. 2015	Deep Sea Research II	DOI: 10.1016/j.dsr2.2014.07.091	YES	GEOTRACES GA03 KN199-4 (US)	5	2010	31.0055	-22.0037	4898.6
Atlantic	Bowman et al. 2015	Deep Sea Research II	DOI: 10.1016/j.dsr2.2014.07.092	YES	GEOTRACES GA03 KN199-4 (US)	6	2010	27.5152	-22.0034	2	0.175
Atlantic	Bowman et al. 2015	Deep Sea Research II	DOI: 10.1016/j.dsr2.2014.07.093	YES	GEOTRACES GA03 KN199-4 (US)	6	2010	27.5152	-22.0034	41.1	0.5
Atlantic	Bowman et al. 2015	Deep Sea Research II	DOI: 10.1016/j.dsr2.2014.07.094	YES	GEOTRACES GA03 KN199-4 (US)	6	2010	27.5152	-22.0034	65.8	0.34
Atlantic	Bowman et al. 2015	Deep Sea Research II	DOI: 10.1016/j.dsr2.2014.07.095	YES	GEOTRACES GA03 KN199-4 (US)	6	2010	27.5152	-22.0034	91.3	0.29
Atlantic	Bowman et al. 2015	Deep Sea Research II	DOI: 10.1016/j.dsr2.2014.07.096	YES	GEOTRACES GA03 KN199-4 (US)	6	2010	27.5152	-22.0034	116.4	0.23
Atlantic	Bowman et al. 2015	Deep Sea Research II	DOI: 10.1016/j.dsr2.2014.07.097	YES	GEOTRACES GA03 KN199-4 (US)	6	2010	27.5152	-22.0034	135.3	0.23
Atlantic	Bowman et al. 2015	Deep Sea Research II	DOI: 10.1016/j.dsr2.2014.07.098	YES	GEOTRACES GA03 KN199-4 (US)	6	2010	27.5152	-22.0034	186.1	0.26
Atlantic	Bowman et al. 2015	Deep Sea Research II	DOI: 10.1016/j.dsr2.2014.07.099	YES	GEOTRACES GA03 KN199-4 (US)	6	2010	27.5152	-22.0034	302.3	0.41
Atlantic	Bowman et al. 2015	Deep Sea Research II	DOI: 10.1016/j.dsr2.2014.07.100	YES	GEOTRACES GA03 KN199-4 (US)	6	2010	27.5152	-22.0034	401.4	0.59
Atlantic	Bowman et al. 2015	Deep Sea Research II	DOI: 10.1016/j.dsr2.2014.07.101	YES	GEOTRACES GA03 KN199-4 (US)	6	2010	27.5152	-22.0034	601.9	0.65
Atlantic	Bowman et al. 2015	Deep Sea Research II	DOI: 10.1016/j.dsr2.2014.07.102	YES	GEOTRACES GA03 KN199-4 (US)	6	2010	27.5152	-22.0034	801.2	0.7
Atlantic	Bowman et al. 2015	Deep Sea Research II	DOI: 10.1016/j.dsr2.2014.07.103	YES	GEOTRACES GA03 KN199-4 (US)	6	2010	27.5152	-22.0034	1002.9	0.71
Atlantic	Bowman et al. 2015	Deep Sea Research II	DOI: 10.1016/j.dsr2.2014.07.104	YES	GEOTRACES GA03 KN199-4 (US)	6	2010	27.5152	-22.0034	1201.5	0.66
Atlantic	Bowman et al. 2015	Deep Sea Research II	DOI: 10.1016/j.dsr2.2014.07.105	YES	GEOTRACES GA03 KN199-4 (US)	7	2010	24.0001	-22.0001	2	0.205
Atlantic	Bowman et al. 2015	Deep Sea Research II	DOI: 10.1016/j.dsr2.2014.07.106	YES	GEOTRACES GA03 KN199-4 (US)	7	2010	24.0001	-22.0001	35	0.47
Atlantic	Bowman et al. 2015	Deep Sea Research II	DOI: 10.1016/j.dsr2.2014.07.107	YES	GEOTRACES GA03 KN199-4 (US)	7	2010	24.0001	-22.0001	45.6	0.3
Atlantic	Bowman et al. 2015	Deep Sea Research II	DOI: 10.1016/j.dsr2.2014.07.108	YES	GEOTRACES GA03 KN199-4 (US)	7	2010	24.0001	-22.0001	70.6	0.26
Atlantic	Bowman et al. 2015	Deep Sea Research II	DOI: 10.1016/j.dsr2.2014.07.109	YES	GEOTRACES GA03 KN199-4 (US)	7	2010	24.0001	-22.0001	151.2	0.41
Atlantic	Bowman et al. 2015	Deep Sea Research II	DOI: 10.1016/j.dsr2.2014.07.110	YES	GEOTRACES GA03 KN199-4 (US)	7	2010	24.0001	-22.0001	201.1	0.44
Atlantic	Bowman et al. 2015	Deep Sea Research II	DOI: 10.1016/j.dsr2.2014.07.111	YES	GEOTRACES GA03 KN199-4 (US)	7	2010	24.0001	-22.0001	351.1	0.55
Atlantic	Bowman et al. 2015	Deep Sea Research II	DOI: 10.1016/j.dsr2.2014.07.112	YES	GEOTRACES GA03 KN199-4 (US)	7	2010	24.0001	-22.0001	397.5	0.46
Atlantic	Bowman et al. 2015	Deep Sea Research II	DOI: 10.1016/j.dsr2.2014.07.113	YES	GEOTRACES GA03 KN199-4 (US)	7	2010	24.0001	-22.0001	450.5	0.69
Atlantic	Bowman et al. 2015	Deep Sea Research II	DOI: 10.1016/j.dsr2.2014.07.114	YES	GEOTRACES GA03 KN199-4 (US)	7	2010	24.0001	-22.0001	501.1	0.65
Atlantic	Bowman et al. 2015	Deep Sea Research II	DOI: 10.1016/j.dsr2.2014.07.115	YES	GEOTRACES GA03 KN199-4 (US)	7	2010	24.0001	-22.0001	751.1	0.8
Atlantic	Bowman et al. 2015	Deep Sea Research II	DOI: 10.1016/j.dsr2.2014.07.116	YES	GEOTRACES GA03 KN199-4 (US)	7	2010	24.0001	-22.0001	1000.7	0.6
Atlantic	Bowman et al. 2015	Deep Sea Research II	DOI: 10.1016/j.dsr2.2014.07.117	YES	GEOTRACES GA03 KN199-4 (US)	7	2010	24.0001	-22.0001	1200.9	0.51
Atlantic	Bowman et al. 2015	Deep Sea Research II	DOI: 10.1016/j.dsr2.2014.07.118	YES	GEOTRACES GA03 KN199-4 (US)	7	2010	24.0032	-21.996	1498.9	0.6
Atlantic	Bowman et al. 2015	Deep Sea Research II	DOI: 10.1016/j.dsr2.2014.07.119	YES	GEOTRACES GA03 KN199-4 (US)	7	2010	24.0032	-21.996	1749.6	0.54
Atlantic	Bowman et al. 2015	Deep Sea Research II	DOI: 10.1016/j.dsr2.2014.07.120	YES	GEOTRACES GA03 KN199-4 (US)	7	2010	24.0032	-21.996	1998.5	0.55
Atlantic	Bowman et al. 2015	Deep Sea Research II	DOI: 10.1016/j.dsr2.2014.07.121	YES	GEOTRACES GA03 KN199-4 (US)	7	2010	24.0032	-21.996	2247.8	0.76
Atlantic	Bowman et al. 2015	Deep Sea Research II	DOI: 10.1016/j.dsr2.2014.07.122	YES	GEOTRACES GA03 KN199-4 (US)	7	2010	24.0032	-21.996	2499.4	0.72
Atlantic	Bowman et al. 2015	Deep Sea Research II	DOI: 10.1016/j.dsr2.2014.07.123	YES	GEOTRACES GA03 KN199-4 (US)	7	2010	24.0032	-21.996	2749.1	1.01
Atlantic	Bowman et al. 2015	Deep Sea Research II	DOI: 10.1016/j.dsr2.2014.07.124	YES	GEOTRACES GA03 KN199-4 (US)	7	2010	24.0032	-21.996	2998.1	0.77
Atlantic	Bowman et al. 2015	Deep Sea Research II	DOI: 10.1016/j.dsr2.2014.07.125	YES	GEOTRACES GA03 KN199-4 (US)	7	2010	24.0032	-21.996	3247.9	0.74	0.198256
Atlantic	Bowman et al. 2015	Deep Sea Research II	DOI: 10.1016/j.dsr2.2014.07.126	YES	GEOTRACES GA03 KN199-4 (US)	7	2010	24.0032	-21.996	3497.6	0.89
Atlantic	Bowman et al. 2015	Deep Sea Research II	DOI: 10.1016/j.dsr2.2014.07.127	YES	GEOTRACES GA03 KN199-4 (US)	7	2010	24.0032	-21.996	3826.6	0.74
Atlantic	Bowman et al. 2015	Deep Sea Research II	DOI: 10.1016/j.dsr2.2014.07.128	YES	GEOTRACES GA03 KN199-4 (US)	7	2010	24.0032	-21.996	4156.9	0.81	0.0777392
Atlantic	Bowman et al. 2015	Deep Sea Research II	DOI: 10.1016/j.dsr2.2014.07.129	YES	GEOTRACES GA03 KN199-4 (US)	7	2010	24.0032	-21.996	4496.2		0.132028
Atlantic	Bowman et al. 2015	Deep Sea Research II	DOI: 10.1016/j.dsr2.2014.07.130	YES	GEOTRACES GA03 KN199-4 (US)	8	2010	21.0002	-22.0019	2	0.257
Atlantic	Bowman et al. 2015	Deep Sea Research II	DOI: 10.1016/j.dsr2.2014.07.131	YES	GEOTRACES GA03 KN199-4 (US)	8	2010	21.0002	-22.0019	35.2	0.85
Atlantic	Bowman et al. 2015	Deep Sea Research II	DOI: 10.1016/j.dsr2.2014.07.132	YES	GEOTRACES GA03 KN199-4 (US)	8	2010	21.0002	-22.0019	55.8	0.49
Atlantic	Bowman et al. 2015	Deep Sea Research II	DOI: 10.1016/j.dsr2.2014.07.133	YES	GEOTRACES GA03 KN199-4 (US)	8	2010	21.0002	-22.0019	90.5	0.78
Atlantic	Bowman et al. 2015	Deep Sea Research II	DOI: 10.1016/j.dsr2.2014.07.134	YES	GEOTRACES GA03 KN199-4 (US)	8	2010	21.0002	-22.0019	110.5	0.63
Atlantic	Bowman et al. 2015	Deep Sea Research II	DOI: 10.1016/j.dsr2.2014.07.135	YES	GEOTRACES GA03 KN199-4 (US)	8	2010	21.0002	-22.0019	135.1	0.46
Atlantic	Bowman et al. 2015	Deep Sea Research II	DOI: 10.1016/j.dsr2.2014.07.136	YES	GEOTRACES GA03 KN199-4 (US)	8	2010	21.0002	-22.0019	185.7	0.62
Atlantic	Bowman et al. 2015	Deep Sea Research II	DOI: 10.1016/j.dsr2.2014.07.137	YES	GEOTRACES GA03 KN199-4 (US)	8	2010	21.0002	-22.0019	235.5	0.57
Atlantic	Bowman et al. 2015	Deep Sea Research II	DOI: 10.1016/j.dsr2.2014.07.138	YES	GEOTRACES GA03 KN199-4 (US)	8	2010	21.0002	-22.0019	284.9	0.78
Atlantic	Bowman et al. 2015	Deep Sea Research II	DOI: 10.1016/j.dsr2.2014.07.139	YES	GEOTRACES GA03 KN199-4 (US)	8	2010	21.0002	-22.0019	421.1	0.72
Atlantic	Bowman et al. 2015	Deep Sea Research II	DOI: 10.1016/j.dsr2.2014.07.140	YES	GEOTRACES GA03 KN199-4 (US)	8	2010	21.0002	-22.0019	665.9	0.83
Atlantic	Bowman et al. 2015	Deep Sea Research II	DOI: 10.1016/j.dsr2.2014.07.141	YES	GEOTRACES GA03 KN199-4 (US)	8	2010	21.0002	-22.0019	965.4	0.71
Atlantic	Bowman et al. 2015	Deep Sea Research II	DOI: 10.1016/j.dsr2.2014.07.142	YES	GEOTRACES GA03 KN199-4 (US)	8	2010	21.0002	-22.0019	1199.6	0.58
Atlantic	Bowman et al. 2015	Deep Sea Research II	DOI: 10.1016/j.dsr2.2014.07.143	YES	GEOTRACES GA03 KN199-4 (US)	9	2010	17.3502	-18.254	2	0.209	0.0577751
Atlantic	Bowman et al. 2015	Deep Sea Research II	DOI: 10.1016/j.dsr2.2014.07.144	YES	GEOTRACES GA03 KN199-4 (US)	9	2010	17.3502	-18.254	28	0.58	0.031441
Atlantic	Bowman et al. 2015	Deep Sea Research II	DOI: 10.1016/j.dsr2.2014.07.145	YES	GEOTRACES GA03 KN199-4 (US)	9	2010	17.3502	-18.254	49
Atlantic	Bowman et al. 2015	Deep Sea Research II	DOI: 10.1016/j.dsr2.2014.07.146	YES	GEOTRACES GA03 KN199-4 (US)	9	2010	17.3502	-18.254	89	0.66
Atlantic	Bowman et al. 2015	Deep Sea Research II	DOI: 10.1016/j.dsr2.2014.07.147	YES	GEOTRACES GA03 KN199-4 (US)	9	2010	17.3502	-18.254	109.4	0.81
Atlantic	Bowman et al. 2015	Deep Sea Research II	DOI: 10.1016/j.dsr2.2014.07.148	YES	GEOTRACES GA03 KN199-4 (US)	9	2010	17.3502	-18.254	135.2	0.72
Atlantic	Bowman et al. 2015	Deep Sea Research II	DOI: 10.1016/j.dsr2.2014.07.149	YES	GEOTRACES GA03 KN199-4 (US)	9	2010	17.3502	-18.254	184.8	0.78
Atlantic	Bowman et al. 2015	Deep Sea Research II	DOI: 10.1016/j.dsr2.2014.07.150	YES	GEOTRACES GA03 KN199-4 (US)	9	2010	17.3502	-18.254	220.8	1.27
Atlantic	Bowman et al. 2015	Deep Sea Research II	DOI: 10.1016/j.dsr2.2014.07.151	YES	GEOTRACES GA03 KN199-4 (US)	9	2010	17.3502	-18.254	285.2	1.02
Atlantic	Bowman et al. 2015	Deep Sea Research II	DOI: 10.1016/j.dsr2.2014.07.152	YES	GEOTRACES GA03 KN199-4 (US)	9	2010	17.3502	-18.254	361.1	1.02	0.094852
Atlantic	Bowman et al. 2015	Deep Sea Research II	DOI: 10.1016/j.dsr2.2014.07.153	YES	GEOTRACES GA03 KN199-4 (US)	9	2010	17.3502	-18.254	664.9	1.05
Atlantic	Bowman et al. 2015	Deep Sea Research II	DOI: 10.1016/j.dsr2.2014.07.154	YES	GEOTRACES GA03 KN199-4 (US)	9	2010	17.358	-18.2503	797.3	0.81
Atlantic	Bowman et al. 2015	Deep Sea Research II	DOI: 10.1016/j.dsr2.2014.07.155	YES	GEOTRACES GA03 KN199-4 (US)	9	2010	17.3502	-18.254	965	0.94
Atlantic	Bowman et al. 2015	Deep Sea Research II	DOI: 10.1016/j.dsr2.2014.07.156	YES	GEOTRACES GA03 KN199-4 (US)	9	2010	17.358	-18.2503	1094.6	0.41
Atlantic	Bowman et al. 2015	Deep Sea Research II	DOI: 10.1016/j.dsr2.2014.07.157	YES	GEOTRACES GA03 KN199-4 (US)	9	2010	17.3502	-18.254	1199.7	0.42
Atlantic	Bowman et al. 2015	Deep Sea Research II	DOI: 10.1016/j.dsr2.2014.07.158	YES	GEOTRACES GA03 KN199-4 (US)	9	2010	17.358	-18.2503	1235.6	0.43
Atlantic	Bowman et al. 2015	Deep Sea Research II	DOI: 10.1016/j.dsr2.2014.07.159	YES	GEOTRACES GA03 KN199-4 (US)	9	2010	17.358	-18.2503	1384.6	0.42
Atlantic	Bowman et al. 2015	Deep Sea Research II	DOI: 10.1016/j.dsr2.2014.07.160	YES	GEOTRACES GA03 KN199-4 (US)	9	2010	17.358	-18.2503	1538	0.57
Atlantic	Bowman et al. 2015	Deep Sea Research II	DOI: 10.1016/j.dsr2.2014.07.161	YES	GEOTRACES GA03 KN199-4 (US)	9	2010	17.358	-18.2503	1787.1	0.95
Atlantic	Bowman et al. 2015	Deep Sea Research II	DOI: 10.1016/j.dsr2.2014.07.162	YES	GEOTRACES GA03 KN199-4 (US)	9	2010	17.358	-18.2503	1882.7	0.79
Atlantic	Bowman et al. 2015	Deep Sea Research II	DOI: 10.1016/j.dsr2.2014.07.163	YES	GEOTRACES GA03 KN199-4 (US)	9	2010	17.358	-18.2503	2087.9	0.76
Atlantic	Bowman et al. 2015	Deep Sea Research II	DOI: 10.1016/j.dsr2.2014.07.164	YES	GEOTRACES GA03 KN199-4 (US)	9	2010	17.358	-18.2503	2294.4
Atlantic	Bowman et al. 2015	Deep Sea Research II	DOI: 10.1016/j.dsr2.2014.07.165	YES	GEOTRACES GA03 KN199-4 (US)	9	2010	17.358	-18.2503	2585
Atlantic	Bowman et al. 2015	Deep Sea Research II	DOI: 10.1016/j.dsr2.2014.07.166	YES	GEOTRACES GA03 KN199-4 (US)	9	2010	17.358	-18.2503	2900.3
Atlantic	Bowman et al. 2015	Deep Sea Research II	DOI: 10.1016/j.dsr2.2014.07.167	YES	GEOTRACES GA03 KN199-4 (US)	9	2010	17.358	-18.2503	2999.4
Atlantic	Bowman et al. 2015	Deep Sea Research II	DOI: 10.1016/j.dsr2.2014.07.168	YES	GEOTRACES GA03 KN199-4 (US)	10	2010	17.3515	-20.8164	2	0.0863
Atlantic	Bowman et al. 2015	Deep Sea Research II	DOI: 10.1016/j.dsr2.2014.07.169	YES	GEOTRACES GA03 KN199-4 (US)	10	2010	17.3515	-20.8164	31.5	0.84	0.0463894
Atlantic	Bowman et al. 2015	Deep Sea Research II	DOI: 10.1016/j.dsr2.2014.07.170	YES	GEOTRACES GA03 KN199-4 (US)	10	2010	17.3515	-20.8164	50.6	0.47
Atlantic	Bowman et al. 2015	Deep Sea Research II	DOI: 10.1016/j.dsr2.2014.07.171	YES	GEOTRACES GA03 KN199-4 (US)	10	2010	17.3515	-20.8164	84.6	1.22
Atlantic	Bowman et al. 2015	Deep Sea Research II	DOI: 10.1016/j.dsr2.2014.07.172	YES	GEOTRACES GA03 KN199-4 (US)	10	2010	17.3515	-20.8164	100.7	1.17
Atlantic	Bowman et al. 2015	Deep Sea Research II	DOI: 10.1016/j.dsr2.2014.07.173	YES	GEOTRACES GA03 KN199-4 (US)	10	2010	17.3515	-20.8164	140.6	0.88
Atlantic	Bowman et al. 2015	Deep Sea Research II	DOI: 10.1016/j.dsr2.2014.07.174	YES	GEOTRACES GA03 KN199-4 (US)	10	2010	17.3515	-20.8164	186.3	1.16	0.111931
Atlantic	Bowman et al. 2015	Deep Sea Research II	DOI: 10.1016/j.dsr2.2014.07.175	YES	GEOTRACES GA03 KN199-4 (US)	10	2010	17.3515	-20.8164	235.2	1.19
Atlantic	Bowman et al. 2015	Deep Sea Research II	DOI: 10.1016/j.dsr2.2014.07.176	YES	GEOTRACES GA03 KN199-4 (US)	10	2010	17.3515	-20.8164	290.5	1.23
Atlantic	Bowman et al. 2015	Deep Sea Research II	DOI: 10.1016/j.dsr2.2014.07.177	YES	GEOTRACES GA03 KN199-4 (US)	10	2010	17.3515	-20.8164	421.3	1.2
Atlantic	Bowman et al. 2015	Deep Sea Research II	DOI: 10.1016/j.dsr2.2014.07.178	YES	GEOTRACES GA03 KN199-4 (US)	10	2010	17.3515	-20.8164	499.2	0.99
Atlantic	Bowman et al. 2015	Deep Sea Research II	DOI: 10.1016/j.dsr2.2014.07.179	YES	GEOTRACES GA03 KN199-4 (US)	10	2010	17.3515	-20.8164	664.8	0.86
Atlantic	Bowman et al. 2015	Deep Sea Research II	DOI: 10.1016/j.dsr2.2014.07.180	YES	GEOTRACES GA03 KN199-4 (US)	10	2010	17.3515	-20.8164	799.7	0.79
Atlantic	Bowman et al. 2015	Deep Sea Research II	DOI: 10.1016/j.dsr2.2014.07.181	YES	GEOTRACES GA03 KN199-4 (US)	10	2010	17.3536	-20.8277	963.9	0.84
Atlantic	Bowman et al. 2015	Deep Sea Research II	DOI: 10.1016/j.dsr2.2014.07.182	YES	GEOTRACES GA03 KN199-4 (US)	10	2010	17.3536	-20.8277	1099.6	1.15
Atlantic	Bowman et al. 2015	Deep Sea Research II	DOI: 10.1016/j.dsr2.2014.07.183	YES	GEOTRACES GA03 KN199-4 (US)	10	2010	17.3536	-20.8277	1249.1	1.06
Atlantic	Bowman et al. 2015	Deep Sea Research II	DOI: 10.1016/j.dsr2.2014.07.184	YES	GEOTRACES GA03 KN199-4 (US)	10	2010	17.3536	-20.8277	1497.7	0.63
Atlantic	Bowman et al. 2015	Deep Sea Research II	DOI: 10.1016/j.dsr2.2014.07.185	YES	GEOTRACES GA03 KN199-4 (US)	10	2010	17.3536	-20.8277	1750.1	0.76	0.0577622
Atlantic	Bowman et al. 2015	Deep Sea Research II	DOI: 10.1016/j.dsr2.2014.07.186	YES	GEOTRACES GA03 KN199-4 (US)	10	2010	17.3536	-20.8277	1998.5	0.99	0.0842197
Atlantic	Bowman et al. 2015	Deep Sea Research II	DOI: 10.1016/j.dsr2.2014.07.187	YES	GEOTRACES GA03 KN199-4 (US)	10	2010	17.3536	-20.8277	2249	0.62
Atlantic	Bowman et al. 2015	Deep Sea Research II	DOI: 10.1016/j.dsr2.2014.07.188	YES	GEOTRACES GA03 KN199-4 (US)	10	2010	17.3536	-20.8277	2498.5	1.01
Atlantic	Bowman et al. 2015	Deep Sea Research II	DOI: 10.1016/j.dsr2.2014.07.189	YES	GEOTRACES GA03 KN199-4 (US)	10	2010	17.3536	-20.8277	2698.3	0.99
Atlantic	Bowman et al. 2015	Deep Sea Research II	DOI: 10.1016/j.dsr2.2014.07.190	YES	GEOTRACES GA03 KN199-4 (US)	10	2010	17.3536	-20.8277	2999.1	1.05
Atlantic	Bowman et al. 2015	Deep Sea Research II	DOI: 10.1016/j.dsr2.2014.07.191	YES	GEOTRACES GA03 KN199-4 (US)	10	2010	17.3536	-20.8277	3278.3
Atlantic	Bowman et al. 2015	Deep Sea Research II	DOI: 10.1016/j.dsr2.2014.07.192	YES	GEOTRACES GA03 KN199-4 (US)	10	2010	17.3536	-20.8277	3320.9
Atlantic	Bowman et al. 2015	Deep Sea Research II	DOI: 10.1016/j.dsr2.2014.07.193	YES	GEOTRACES GA03 KN199-4 (US)	11	2010	17.3521	-22.7837	2	0.1303
Atlantic	Bowman et al. 2015	Deep Sea Research II	DOI: 10.1016/j.dsr2.2014.07.194	YES	GEOTRACES GA03 KN199-4 (US)	11	2010	17.3521	-22.7837	29.7	0.8
Atlantic	Bowman et al. 2015	Deep Sea Research II	DOI: 10.1016/j.dsr2.2014.07.195	YES	GEOTRACES GA03 KN199-4 (US)	11	2010	17.3521	-22.7837	61.8	0.81	0.0963776
Atlantic	Bowman et al. 2015	Deep Sea Research II	DOI: 10.1016/j.dsr2.2014.07.196	YES	GEOTRACES GA03 KN199-4 (US)	11	2010	17.3521	-22.7837	85.4	0.74
Atlantic	Bowman et al. 2015	Deep Sea Research II	DOI: 10.1016/j.dsr2.2014.07.197	YES	GEOTRACES GA03 KN199-4 (US)	11	2010	17.3521	-22.7837	135.8	0.62	0.42919
Atlantic	Bowman et al. 2015	Deep Sea Research II	DOI: 10.1016/j.dsr2.2014.07.198	YES	GEOTRACES GA03 KN199-4 (US)	11	2010	17.3521	-22.7837	179.7	0.74	0.358481
Atlantic	Bowman et al. 2015	Deep Sea Research II	DOI: 10.1016/j.dsr2.2014.07.199	YES	GEOTRACES GA03 KN199-4 (US)	11	2010	17.3521	-22.7837	199.6	0.7
Atlantic	Bowman et al. 2015	Deep Sea Research II	DOI: 10.1016/j.dsr2.2014.07.200	YES	GEOTRACES GA03 KN199-4 (US)	11	2010	17.3521	-22.7837	250.3	0.89	0.222659
Atlantic	Bowman et al. 2015	Deep Sea Research II	DOI: 10.1016/j.dsr2.2014.07.201	YES	GEOTRACES GA03 KN199-4 (US)	11	2010	17.3521	-22.7837	300.7	0.99
Atlantic	Bowman et al. 2015	Deep Sea Research II	DOI: 10.1016/j.dsr2.2014.07.202	YES	GEOTRACES GA03 KN199-4 (US)	11	2010	17.3521	-22.7837	351.3	0.74	0.157326
Atlantic	Bowman et al. 2015	Deep Sea Research II	DOI: 10.1016/j.dsr2.2014.07.203	YES	GEOTRACES GA03 KN199-4 (US)	11	2010	17.3521	-22.7837	449.9	0.71	0.166163
Atlantic	Bowman et al. 2015	Deep Sea Research II	DOI: 10.1016/j.dsr2.2014.07.204	YES	GEOTRACES GA03 KN199-4 (US)	11	2010	17.3521	-22.7837	600.4	0.69
Atlantic	Bowman et al. 2015	Deep Sea Research II	DOI: 10.1016/j.dsr2.2014.07.205	YES	GEOTRACES GA03 KN199-4 (US)	11	2010	17.3521	-22.7837	800.5	1.16
Atlantic	Bowman et al. 2015	Deep Sea Research II	DOI: 10.1016/j.dsr2.2014.07.206	YES	GEOTRACES GA03 KN199-4 (US)	11	2010	17.3502	-22.7837	964.1	0.95
Atlantic	Bowman et al. 2015	Deep Sea Research II	DOI: 10.1016/j.dsr2.2014.07.207	YES	GEOTRACES GA03 KN199-4 (US)	11	2010	17.3502	-22.7837	1098.1	0.83	0.0805901
Atlantic	Bowman et al. 2015	Deep Sea Research II	DOI: 10.1016/j.dsr2.2014.07.208	YES	GEOTRACES GA03 KN199-4 (US)	11	2010	17.3502	-22.7837	1248.1	0.7
Atlantic	Bowman et al. 2015	Deep Sea Research II	DOI: 10.1016/j.dsr2.2014.07.209	YES	GEOTRACES GA03 KN199-4 (US)	11	2010	17.3502	-22.7837	1498.5	0.98
Atlantic	Bowman et al. 2015	Deep Sea Research II	DOI: 10.1016/j.dsr2.2014.07.210	YES	GEOTRACES GA03 KN199-4 (US)	11	2010	17.3502	-22.7837	1748.4	1.06
Atlantic	Bowman et al. 2015	Deep Sea Research II	DOI: 10.1016/j.dsr2.2014.07.211	YES	GEOTRACES GA03 KN199-4 (US)	11	2010	17.3502	-22.7837	1998.1	0.7
Atlantic	Bowman et al. 2015	Deep Sea Research II	DOI: 10.1016/j.dsr2.2014.07.212	YES	GEOTRACES GA03 KN199-4 (US)	11	2010	17.3502	-22.7837	2247.6	0.9	0.0703103
Atlantic	Bowman et al. 2015	Deep Sea Research II	DOI: 10.1016/j.dsr2.2014.07.213	YES	GEOTRACES GA03 KN199-4 (US)	11	2010	17.3502	-22.7837	2499.4	1.26	0.0901607
Atlantic	Bowman et al. 2015	Deep Sea Research II	DOI: 10.1016/j.dsr2.2014.07.214	YES	GEOTRACES GA03 KN199-4 (US)	11	2010	17.3502	-22.7837	2747.8		0.103287
Atlantic	Bowman et al. 2015	Deep Sea Research II	DOI: 10.1016/j.dsr2.2014.07.215	YES	GEOTRACES GA03 KN199-4 (US)	11	2010	17.3502	-22.7837	2997.9
Atlantic	Bowman et al. 2015	Deep Sea Research II	DOI: 10.1016/j.dsr2.2014.07.216	YES	GEOTRACES GA03 KN199-4 (US)	11	2010	17.3502	-22.7837	3198.4
Atlantic	Bowman et al. 2015	Deep Sea Research II	DOI: 10.1016/j.dsr2.2014.07.217	YES	GEOTRACES GA03 KN199-4 (US)	11	2010	17.3502	-22.7837	3298.4
Atlantic	Bowman et al. 2015	Deep Sea Research II	DOI: 10.1016/j.dsr2.2014.07.218	YES	GEOTRACES GA03 KN199-4 (US)	12	2010	17.3998	-24.4998	2	0.366	0.0957703
Atlantic	Bowman et al. 2015	Deep Sea Research II	DOI: 10.1016/j.dsr2.2014.07.219	YES	GEOTRACES GA03 KN199-4 (US)	12	2010	17.3998	-24.4998	37.5	0.195	0.14407
Atlantic	Bowman et al. 2015	Deep Sea Research II	DOI: 10.1016/j.dsr2.2014.07.220	YES	GEOTRACES GA03 KN199-4 (US)	12	2010	17.3998	-24.4998	48.1	0.47
Atlantic	Bowman et al. 2015	Deep Sea Research II	DOI: 10.1016/j.dsr2.2014.07.221	YES	GEOTRACES GA03 KN199-4 (US)	12	2010	17.3998	-24.4998	71.9	0.8
Atlantic	Bowman et al. 2015	Deep Sea Research II	DOI: 10.1016/j.dsr2.2014.07.222	YES	GEOTRACES GA03 KN199-4 (US)	12	2010	17.3998	-24.4998	90.2	0.895
Atlantic	Bowman et al. 2015	Deep Sea Research II	DOI: 10.1016/j.dsr2.2014.07.223	YES	GEOTRACES GA03 KN199-4 (US)	12	2010	17.3998	-24.4998	135.4	0.725
Atlantic	Bowman et al. 2015	Deep Sea Research II	DOI: 10.1016/j.dsr2.2014.07.224	YES	GEOTRACES GA03 KN199-4 (US)	12	2010	17.3998	-24.4998	185	0.585
Atlantic	Bowman et al. 2015	Deep Sea Research II	DOI: 10.1016/j.dsr2.2014.07.225	YES	GEOTRACES GA03 KN199-4 (US)	12	2010	17.3998	-24.4998	235.4	0.99
Atlantic	Bowman et al. 2015	Deep Sea Research II	DOI: 10.1016/j.dsr2.2014.07.226	YES	GEOTRACES GA03 KN199-4 (US)	12	2010	17.3998	-24.4998	285.6	1.325
Atlantic	Bowman et al. 2015	Deep Sea Research II	DOI: 10.1016/j.dsr2.2014.07.227	YES	GEOTRACES GA03 KN199-4 (US)	12	2010	17.3998	-24.4998	351.1	0.775
Atlantic	Bowman et al. 2015	Deep Sea Research II	DOI: 10.1016/j.dsr2.2014.07.228	YES	GEOTRACES GA03 KN199-4 (US)	12	2010	17.3998	-24.4998	450.6	0.61
Atlantic	Bowman et al. 2015	Deep Sea Research II	DOI: 10.1016/j.dsr2.2014.07.229	YES	GEOTRACES GA03 KN199-4 (US)	12	2010	17.3998	-24.4998	601.3	0.595
Atlantic	Bowman et al. 2015	Deep Sea Research II	DOI: 10.1016/j.dsr2.2014.07.230	YES	GEOTRACES GA03 KN199-4 (US)	12	2010	17.3998	-24.4998	800.8	0.975
Atlantic	Bowman et al. 2015	Deep Sea Research II	DOI: 10.1016/j.dsr2.2014.07.231	YES	GEOTRACES GA03 KN199-4 (US)	12	2010	17.404	-24.4962	964.1	0.505
Atlantic	Bowman et al. 2015	Deep Sea Research II	DOI: 10.1016/j.dsr2.2014.07.232	YES	GEOTRACES GA03 KN199-4 (US)	12	2010	17.404	-24.4962	1099.3	0.495
Atlantic	Bowman et al. 2015	Deep Sea Research II	DOI: 10.1016/j.dsr2.2014.07.233	YES	GEOTRACES GA03 KN199-4 (US)	12	2010	17.404	-24.4962	1256.5	0.58
Atlantic	Bowman et al. 2015	Deep Sea Research II	DOI: 10.1016/j.dsr2.2014.07.234	YES	GEOTRACES GA03 KN199-4 (US)	12	2010	17.404	-24.4962	1498.8	0.675	0.0977691
Atlantic	Bowman et al. 2015	Deep Sea Research II	DOI: 10.1016/j.dsr2.2014.07.235	YES	GEOTRACES GA03 KN199-4 (US)	12	2010	17.404	-24.4962	1749.3	0.785
Atlantic	Bowman et al. 2015	Deep Sea Research II	DOI: 10.1016/j.dsr2.2014.07.236	YES	GEOTRACES GA03 KN199-4 (US)	12	2010	17.404	-24.4962	1998.8	0.525	0.107753
Atlantic	Bowman et al. 2015	Deep Sea Research II	DOI: 10.1016/j.dsr2.2014.07.237	YES	GEOTRACES GA03 KN199-4 (US)	12	2010	17.404	-24.4962	2248.1	0.63	0.0517622
Atlantic	Bowman et al. 2015	Deep Sea Research II	DOI: 10.1016/j.dsr2.2014.07.238	YES	GEOTRACES GA03 KN199-4 (US)	12	2010	17.404	-24.4962	2499.3	0.565
Atlantic	Bowman et al. 2015	Deep Sea Research II	DOI: 10.1016/j.dsr2.2014.07.239	YES	GEOTRACES GA03 KN199-4 (US)	12	2010	17.404	-24.4962	2748.7	0.545
Atlantic	Bowman et al. 2015	Deep Sea Research II	DOI: 10.1016/j.dsr2.2014.07.240	YES	GEOTRACES GA03 KN199-4 (US)	12	2010	17.404	-24.4962	2998.3	0.915
Atlantic	Bowman et al. 2015	Deep Sea Research II	DOI: 10.1016/j.dsr2.2014.07.241	YES	GEOTRACES GA03 KN199-4 (US)	12	2010	17.404	-24.4962	3198.2
Atlantic	Bowman et al. 2015	Deep Sea Research II	DOI: 10.1016/j.dsr2.2014.07.242	YES	GEOTRACES GA03 KN199-4 (US)	12	2010	17.404	-24.4962	3497.8
Atlantic	Bowman et al. 2015	Deep Sea Research II	DOI: 10.1016/j.dsr2.2014.07.242	YES	GEOTRACES GA03 KN204-1 (US)	1	2011	39.7	-69.8	2	0.47	0.289247
Atlantic	Bowman et al. 2015	Deep Sea Research II	DOI: 10.1016/j.dsr2.2014.07.243	YES	GEOTRACES GA03 KN204-1 (US)	1	2011	39.7	-69.8	30	0.54
Atlantic	Bowman et al. 2015	Deep Sea Research II	DOI: 10.1016/j.dsr2.2014.07.244	YES	GEOTRACES GA03 KN204-1 (US)	1	2011	39.7	-69.8	58	0.56
Atlantic	Bowman et al. 2015	Deep Sea Research II	DOI: 10.1016/j.dsr2.2014.07.245	YES	GEOTRACES GA03 KN204-1 (US)	1	2011	39.7	-69.8	90	0.72
Atlantic	Bowman et al. 2015	Deep Sea Research II	DOI: 10.1016/j.dsr2.2014.07.246	YES	GEOTRACES GA03 KN204-1 (US)	1	2011	39.7	-69.8	110	0.69
Atlantic	Bowman et al. 2015	Deep Sea Research II	DOI: 10.1016/j.dsr2.2014.07.247	YES	GEOTRACES GA03 KN204-1 (US)	1	2011	39.7	-69.8	135	0.78
Atlantic	Bowman et al. 2015	Deep Sea Research II	DOI: 10.1016/j.dsr2.2014.07.248	YES	GEOTRACES GA03 KN204-1 (US)	1	2011	39.7	-69.8	189	0.84
Atlantic	Bowman et al. 2015	Deep Sea Research II	DOI: 10.1016/j.dsr2.2014.07.249	YES	GEOTRACES GA03 KN204-1 (US)	1	2011	39.7	-69.8	235	0.85
Atlantic	Bowman et al. 2015	Deep Sea Research II	DOI: 10.1016/j.dsr2.2014.07.250	YES	GEOTRACES GA03 KN204-1 (US)	1	2011	39.7	-69.8	285	0.88
Atlantic	Bowman et al. 2015	Deep Sea Research II	DOI: 10.1016/j.dsr2.2014.07.251	YES	GEOTRACES GA03 KN204-1 (US)	1	2011	39.7	-69.8	325	0.9
Atlantic	Bowman et al. 2015	Deep Sea Research II	DOI: 10.1016/j.dsr2.2014.07.252	YES	GEOTRACES GA03 KN204-1 (US)	1	2011	39.7	-69.8	420	0.87
Atlantic	Bowman et al. 2015	Deep Sea Research II	DOI: 10.1016/j.dsr2.2014.07.253	YES	GEOTRACES GA03 KN204-1 (US)	1	2011	39.7	-69.8	475	0.85
Atlantic	Bowman et al. 2015	Deep Sea Research II	DOI: 10.1016/j.dsr2.2014.07.254	YES	GEOTRACES GA03 KN204-1 (US)	1	2011	39.7	-69.8	525	0.97
Atlantic	Bowman et al. 2015	Deep Sea Research II	DOI: 10.1016/j.dsr2.2014.07.255	YES	GEOTRACES GA03 KN204-1 (US)	1	2011	39.7	-69.8	600	0.95
Atlantic	Bowman et al. 2015	Deep Sea Research II	DOI: 10.1016/j.dsr2.2014.07.256	YES	GEOTRACES GA03 KN204-1 (US)	1	2011	39.7	-69.8	669	0.87
Atlantic	Bowman et al. 2015	Deep Sea Research II	DOI: 10.1016/j.dsr2.2014.07.257	YES	GEOTRACES GA03 KN204-1 (US)	1	2011	39.7	-69.8	825	0.87
Atlantic	Bowman et al. 2015	Deep Sea Research II	DOI: 10.1016/j.dsr2.2014.07.258	YES	GEOTRACES GA03 KN204-1 (US)	1	2011	39.7	-69.8	965	0.84	0.402873
Atlantic	Bowman et al. 2015	Deep Sea Research II	DOI: 10.1016/j.dsr2.2014.07.259	YES	GEOTRACES GA03 KN204-1 (US)	1	2011	39.7	-69.8	1075	0.73	0.388332
Atlantic	Bowman et al. 2015	Deep Sea Research II	DOI: 10.1016/j.dsr2.2014.07.260	YES	GEOTRACES GA03 KN204-1 (US)	1	2011	39.7	-69.8	1200	0.64	0.387071
Atlantic	Bowman et al. 2015	Deep Sea Research II	DOI: 10.1016/j.dsr2.2014.07.261	YES	GEOTRACES GA03 KN204-1 (US)	1	2011	39.7	-69.8	1350	0.61	0.290289
Atlantic	Bowman et al. 2015	Deep Sea Research II	DOI: 10.1016/j.dsr2.2014.07.262	YES	GEOTRACES GA03 KN204-1 (US)	1	2011	39.7	-69.8	1500	0.64
Atlantic	Bowman et al. 2015	Deep Sea Research II	DOI: 10.1016/j.dsr2.2014.07.263	YES	GEOTRACES GA03 KN204-1 (US)	1	2011	39.7	-69.8	1650	0.67
Atlantic	Bowman et al. 2015	Deep Sea Research II	DOI: 10.1016/j.dsr2.2014.07.264	YES	GEOTRACES GA03 KN204-1 (US)	1	2011	39.7	-69.8	1800	0.66
Atlantic	Bowman et al. 2015	Deep Sea Research II	DOI: 10.1016/j.dsr2.2014.07.265	YES	GEOTRACES GA03 KN204-1 (US)	1	2011	39.7	-69.8	2000	0.7
Atlantic	Bowman et al. 2015	Deep Sea Research II	DOI: 10.1016/j.dsr2.2014.07.266	YES	GEOTRACES GA03 KN204-1 (US)	1	2011	39.7	-69.8	2050	0.72
Atlantic	Bowman et al. 2015	Deep Sea Research II	DOI: 10.1016/j.dsr2.2014.07.267	YES	GEOTRACES GA03 KN204-1 (US)	2	2011	39.35	-69.54	2	0.6
Atlantic	Bowman et al. 2015	Deep Sea Research II	DOI: 10.1016/j.dsr2.2014.07.268	YES	GEOTRACES GA03 KN204-1 (US)	2	2011	39.35	-69.54	35	0.99
Atlantic	Bowman et al. 2015	Deep Sea Research II	DOI: 10.1016/j.dsr2.2014.07.269	YES	GEOTRACES GA03 KN204-1 (US)	2	2011	39.35	-69.54	46	0.78
Atlantic	Bowman et al. 2015	Deep Sea Research II	DOI: 10.1016/j.dsr2.2014.07.270	YES	GEOTRACES GA03 KN204-1 (US)	2	2011	39.35	-69.54	70	1.19
Atlantic	Bowman et al. 2015	Deep Sea Research II	DOI: 10.1016/j.dsr2.2014.07.271	YES	GEOTRACES GA03 KN204-1 (US)	2	2011	39.35	-69.54	100	1.09	0.303075
Atlantic	Bowman et al. 2015	Deep Sea Research II	DOI: 10.1016/j.dsr2.2014.07.272	YES	GEOTRACES GA03 KN204-1 (US)	2	2011	39.35	-69.54	135	1.22	0.469235
Atlantic	Bowman et al. 2015	Deep Sea Research II	DOI: 10.1016/j.dsr2.2014.07.273	YES	GEOTRACES GA03 KN204-1 (US)	2	2011	39.35	-69.54	187		0.569426
Atlantic	Bowman et al. 2015	Deep Sea Research II	DOI: 10.1016/j.dsr2.2014.07.274	YES	GEOTRACES GA03 KN204-1 (US)	2	2011	39.35	-69.54	235	1.41	0.423851
Atlantic	Bowman et al. 2015	Deep Sea Research II	DOI: 10.1016/j.dsr2.2014.07.275	YES	GEOTRACES GA03 KN204-1 (US)	2	2011	39.35	-69.54	289	1.48	0.198803
Atlantic	Bowman et al. 2015	Deep Sea Research II	DOI: 10.1016/j.dsr2.2014.07.276	YES	GEOTRACES GA03 KN204-1 (US)	2	2011	39.35	-69.54	325	1.25	0.621051
Atlantic	Bowman et al. 2015	Deep Sea Research II	DOI: 10.1016/j.dsr2.2014.07.277	YES	GEOTRACES GA03 KN204-1 (US)	2	2011	39.35	-69.54	420	1.11	0.889575
Atlantic	Bowman et al. 2015	Deep Sea Research II	DOI: 10.1016/j.dsr2.2014.07.278	YES	GEOTRACES GA03 KN204-1 (US)	2	2011	39.35	-69.54	475	1.02
Atlantic	Bowman et al. 2015	Deep Sea Research II	DOI: 10.1016/j.dsr2.2014.07.279	YES	GEOTRACES GA03 KN204-1 (US)	2	2011	39.35	-69.54	525	1.18	0.311915
Atlantic	Bowman et al. 2015	Deep Sea Research II	DOI: 10.1016/j.dsr2.2014.07.280	YES	GEOTRACES GA03 KN204-1 (US)	2	2011	39.35	-69.54	600	0.87
Atlantic	Bowman et al. 2015	Deep Sea Research II	DOI: 10.1016/j.dsr2.2014.07.281	YES	GEOTRACES GA03 KN204-1 (US)	2	2011	39.35	-69.54	669
Atlantic	Bowman et al. 2015	Deep Sea Research II	DOI: 10.1016/j.dsr2.2014.07.282	YES	GEOTRACES GA03 KN204-1 (US)	2	2011	39.35	-69.54	825
Atlantic	Bowman et al. 2015	Deep Sea Research II	DOI: 10.1016/j.dsr2.2014.07.283	YES	GEOTRACES GA03 KN204-1 (US)	2	2011	39.35	-69.54	965	1.06
Atlantic	Bowman et al. 2015	Deep Sea Research II	DOI: 10.1016/j.dsr2.2014.07.284	YES	GEOTRACES GA03 KN204-1 (US)	2	2011	39.35	-69.54	1200	1.03
Atlantic	Bowman et al. 2015	Deep Sea Research II	DOI: 10.1016/j.dsr2.2014.07.285	YES	GEOTRACES GA03 KN204-1 (US)	2	2011	39.35	-69.54	1350
Atlantic	Bowman et al. 2015	Deep Sea Research II	DOI: 10.1016/j.dsr2.2014.07.286	YES	GEOTRACES GA03 KN204-1 (US)	2	2011	39.35	-69.54	1500		0.199906
Atlantic	Bowman et al. 2015	Deep Sea Research II	DOI: 10.1016/j.dsr2.2014.07.287	YES	GEOTRACES GA03 KN204-1 (US)	2	2011	39.35	-69.54	1690	1.05	0.367166
Atlantic	Bowman et al. 2015	Deep Sea Research II	DOI: 10.1016/j.dsr2.2014.07.288	YES	GEOTRACES GA03 KN204-1 (US)	2	2011	39.35	-69.54	1800	0.96	0.481953
Atlantic	Bowman et al. 2015	Deep Sea Research II	DOI: 10.1016/j.dsr2.2014.07.289	YES	GEOTRACES GA03 KN204-1 (US)	2	2011	39.35	-69.54	2000	0.97	0.389372
Atlantic	Bowman et al. 2015	Deep Sea Research II	DOI: 10.1016/j.dsr2.2014.07.290	YES	GEOTRACES GA03 KN204-1 (US)	2	2011	39.35	-69.54	2200	1.11	0.330216
Atlantic	Bowman et al. 2015	Deep Sea Research II	DOI: 10.1016/j.dsr2.2014.07.291	YES	GEOTRACES GA03 KN204-1 (US)	2	2011	39.35	-69.54	2460	1.22	0.230585
Atlantic	Bowman et al. 2015	Deep Sea Research II	DOI: 10.1016/j.dsr2.2014.07.292	YES	GEOTRACES GA03 KN204-1 (US)	3	2011	38.67	-69.1	28	1.34	0.100744
Atlantic	Bowman et al. 2015	Deep Sea Research II	DOI: 10.1016/j.dsr2.2014.07.293	YES	GEOTRACES GA03 KN204-1 (US)	3	2011	38.67	-69.1	60	1.34	0.153835
Atlantic	Bowman et al. 2015	Deep Sea Research II	DOI: 10.1016/j.dsr2.2014.07.294	YES	GEOTRACES GA03 KN204-1 (US)	3	2011	38.67	-69.1	89	1.02	0.119895
Atlantic	Bowman et al. 2015	Deep Sea Research II	DOI: 10.1016/j.dsr2.2014.07.295	YES	GEOTRACES GA03 KN204-1 (US)	3	2011	38.67	-69.1	110		0.265499
Atlantic	Bowman et al. 2015	Deep Sea Research II	DOI: 10.1016/j.dsr2.2014.07.296	YES	GEOTRACES GA03 KN204-1 (US)	3	2011	38.67	-69.1	135		0.340117
Atlantic	Bowman et al. 2015	Deep Sea Research II	DOI: 10.1016/j.dsr2.2014.07.297	YES	GEOTRACES GA03 KN204-1 (US)	3	2011	38.67	-69.1	189	0.88	0.0873672
Atlantic	Bowman et al. 2015	Deep Sea Research II	DOI: 10.1016/j.dsr2.2014.07.298	YES	GEOTRACES GA03 KN204-1 (US)	3	2011	38.67	-69.1	235	0.85
Atlantic	Bowman et al. 2015	Deep Sea Research II	DOI: 10.1016/j.dsr2.2014.07.299	YES	GEOTRACES GA03 KN204-1 (US)	3	2011	38.67	-69.1	289	0.77
Atlantic	Bowman et al. 2015	Deep Sea Research II	DOI: 10.1016/j.dsr2.2014.07.300	YES	GEOTRACES GA03 KN204-1 (US)	3	2011	38.67	-69.1	417	0.94	0.128447
Atlantic	Bowman et al. 2015	Deep Sea Research II	DOI: 10.1016/j.dsr2.2014.07.301	YES	GEOTRACES GA03 KN204-1 (US)	3	2011	38.67	-69.1	537	1.03	0.165765
Atlantic	Bowman et al. 2015	Deep Sea Research II	DOI: 10.1016/j.dsr2.2014.07.302	YES	GEOTRACES GA03 KN204-1 (US)	3	2011	38.67	-69.1	665	1.06	0.442882
Atlantic	Bowman et al. 2015	Deep Sea Research II	DOI: 10.1016/j.dsr2.2014.07.303	YES	GEOTRACES GA03 KN204-1 (US)	3	2011	38.67	-69.1	800	1.13	0.39578
Atlantic	Bowman et al. 2015	Deep Sea Research II	DOI: 10.1016/j.dsr2.2014.07.304	YES	GEOTRACES GA03 KN204-1 (US)	3	2011	38.67	-69.1	965	0.8
Atlantic	Bowman et al. 2015	Deep Sea Research II	DOI: 10.1016/j.dsr2.2014.07.305	YES	GEOTRACES GA03 KN204-1 (US)	3	2011	38.67	-69.1	1075	0.83
Atlantic	Bowman et al. 2015	Deep Sea Research II	DOI: 10.1016/j.dsr2.2014.07.306	YES	GEOTRACES GA03 KN204-1 (US)	3	2011	38.67	-69.1	1200	0.76	0.189507
Atlantic	Bowman et al. 2015	Deep Sea Research II	DOI: 10.1016/j.dsr2.2014.07.307	YES	GEOTRACES GA03 KN204-1 (US)	3	2011	38.67	-69.1	1350	0.96	0.407807
Atlantic	Bowman et al. 2015	Deep Sea Research II	DOI: 10.1016/j.dsr2.2014.07.308	YES	GEOTRACES GA03 KN204-1 (US)	3	2011	38.67	-69.1	1500	0.93	0.462692
Atlantic	Bowman et al. 2015	Deep Sea Research II	DOI: 10.1016/j.dsr2.2014.07.309	YES	GEOTRACES GA03 KN204-1 (US)	3	2011	38.67	-69.1	1800	1.03	0.479307
Atlantic	Bowman et al. 2015	Deep Sea Research II	DOI: 10.1016/j.dsr2.2014.07.310	YES	GEOTRACES GA03 KN204-1 (US)	3	2011	38.67	-69.1	2100	1.08	0.515653
Atlantic	Bowman et al. 2015	Deep Sea Research II	DOI: 10.1016/j.dsr2.2014.07.311	YES	GEOTRACES GA03 KN204-1 (US)	3	2011	38.67	-69.1	2400	1.1	0.16209
Atlantic	Bowman et al. 2015	Deep Sea Research II	DOI: 10.1016/j.dsr2.2014.07.312	YES	GEOTRACES GA03 KN204-1 (US)	3	2011	38.67	-69.1	2900	1.26	0.555603
Atlantic	Bowman et al. 2015	Deep Sea Research II	DOI: 10.1016/j.dsr2.2014.07.313	YES	GEOTRACES GA03 KN204-1 (US)	3	2011	38.67	-69.1	3125	1.17
Atlantic	Bowman et al. 2015	Deep Sea Research II	DOI: 10.1016/j.dsr2.2014.07.314	YES	GEOTRACES GA03 KN204-1 (US)	3	2011	38.67	-69.1	3275	1.33
Atlantic	Bowman et al. 2015	Deep Sea Research II	DOI: 10.1016/j.dsr2.2014.07.315	YES	GEOTRACES GA03 KN204-1 (US)	5	2011	38.09	-68.7	2	0.59
Atlantic	Bowman et al. 2015	Deep Sea Research II	DOI: 10.1016/j.dsr2.2014.07.316	YES	GEOTRACES GA03 KN204-1 (US)	5	2011	38.09	-68.7	24	1.22
Atlantic	Bowman et al. 2015	Deep Sea Research II	DOI: 10.1016/j.dsr2.2014.07.317	YES	GEOTRACES GA03 KN204-1 (US)	5	2011	38.09	-68.7	70	1.28
Atlantic	Bowman et al. 2015	Deep Sea Research II	DOI: 10.1016/j.dsr2.2014.07.318	YES	GEOTRACES GA03 KN204-1 (US)	5	2011	38.09	-68.7	110	0.82	0.0344177
Atlantic	Bowman et al. 2015	Deep Sea Research II	DOI: 10.1016/j.dsr2.2014.07.319	YES	GEOTRACES GA03 KN204-1 (US)	5	2011	38.09	-68.7	135	0.64	0.0871364
Atlantic	Bowman et al. 2015	Deep Sea Research II	DOI: 10.1016/j.dsr2.2014.07.320	YES	GEOTRACES GA03 KN204-1 (US)	5	2011	38.09	-68.7	185	0.8
Atlantic	Bowman et al. 2015	Deep Sea Research II	DOI: 10.1016/j.dsr2.2014.07.321	YES	GEOTRACES GA03 KN204-1 (US)	5	2011	38.09	-68.7	235	0.81	0.0159864
Atlantic	Bowman et al. 2015	Deep Sea Research II	DOI: 10.1016/j.dsr2.2014.07.322	YES	GEOTRACES GA03 KN204-1 (US)	5	2011	38.09	-68.7	325	0.82	0.0165201
Atlantic	Bowman et al. 2015	Deep Sea Research II	DOI: 10.1016/j.dsr2.2014.07.323	YES	GEOTRACES GA03 KN204-1 (US)	5	2011	38.09	-68.7	420	0.88
Atlantic	Bowman et al. 2015	Deep Sea Research II	DOI: 10.1016/j.dsr2.2014.07.324	YES	GEOTRACES GA03 KN204-1 (US)	5	2011	38.09	-68.7	550
Atlantic	Bowman et al. 2015	Deep Sea Research II	DOI: 10.1016/j.dsr2.2014.07.325	YES	GEOTRACES GA03 KN204-1 (US)	5	2011	38.09	-68.7	669	0.94	0.205567
Atlantic	Bowman et al. 2015	Deep Sea Research II	DOI: 10.1016/j.dsr2.2014.07.326	YES	GEOTRACES GA03 KN204-1 (US)	5	2011	38.09	-68.7	800	1.15	0.489774
Atlantic	Bowman et al. 2015	Deep Sea Research II	DOI: 10.1016/j.dsr2.2014.07.327	YES	GEOTRACES GA03 KN204-1 (US)	5	2011	38.09	-68.7	965	1.08	0.225774
Atlantic	Bowman et al. 2015	Deep Sea Research II	DOI: 10.1016/j.dsr2.2014.07.328	YES	GEOTRACES GA03 KN204-1 (US)	6	2011	37.61	-68.39	40	1.39
Atlantic	Bowman et al. 2015	Deep Sea Research II	DOI: 10.1016/j.dsr2.2014.07.329	YES	GEOTRACES GA03 KN204-1 (US)	6	2011	37.61	-68.39	69	0.94	0.0493889
Atlantic	Bowman et al. 2015	Deep Sea Research II	DOI: 10.1016/j.dsr2.2014.07.330	YES	GEOTRACES GA03 KN204-1 (US)	6	2011	37.61	-68.39	90	0.9	0.0381964
Atlantic	Bowman et al. 2015	Deep Sea Research II	DOI: 10.1016/j.dsr2.2014.07.331	YES	GEOTRACES GA03 KN204-1 (US)	6	2011	37.61	-68.39	110	0.78
Atlantic	Bowman et al. 2015	Deep Sea Research II	DOI: 10.1016/j.dsr2.2014.07.332	YES	GEOTRACES GA03 KN204-1 (US)	6	2011	37.61	-68.39	141	0.82
Atlantic	Bowman et al. 2015	Deep Sea Research II	DOI: 10.1016/j.dsr2.2014.07.333	YES	GEOTRACES GA03 KN204-1 (US)	6	2011	37.61	-68.39	160	0.99
Atlantic	Bowman et al. 2015	Deep Sea Research II	DOI: 10.1016/j.dsr2.2014.07.334	YES	GEOTRACES GA03 KN204-1 (US)	6	2011	37.61	-68.39	235	0.96
Atlantic	Bowman et al. 2015	Deep Sea Research II	DOI: 10.1016/j.dsr2.2014.07.335	YES	GEOTRACES GA03 KN204-1 (US)	6	2011	37.61	-68.39	285	1.04
Atlantic	Bowman et al. 2015	Deep Sea Research II	DOI: 10.1016/j.dsr2.2014.07.336	YES	GEOTRACES GA03 KN204-1 (US)	6	2011	37.61	-68.39	300	1.09
Atlantic	Bowman et al. 2015	Deep Sea Research II	DOI: 10.1016/j.dsr2.2014.07.337	YES	GEOTRACES GA03 KN204-1 (US)	6	2011	37.61	-68.39	350	1.29
Atlantic	Bowman et al. 2015	Deep Sea Research II	DOI: 10.1016/j.dsr2.2014.07.338	YES	GEOTRACES GA03 KN204-1 (US)	6	2011	37.61	-68.39	420	1.4
Atlantic	Bowman et al. 2015	Deep Sea Research II	DOI: 10.1016/j.dsr2.2014.07.339	YES	GEOTRACES GA03 KN204-1 (US)	6	2011	37.61	-68.39	485	1.46
Atlantic	Bowman et al. 2015	Deep Sea Research II	DOI: 10.1016/j.dsr2.2014.07.340	YES	GEOTRACES GA03 KN204-1 (US)	6	2011	37.61	-68.39	600	1.01
Atlantic	Bowman et al. 2015	Deep Sea Research II	DOI: 10.1016/j.dsr2.2014.07.341	YES	GEOTRACES GA03 KN204-1 (US)	6	2011	37.61	-68.39	665	1.03	0.330146
Atlantic	Bowman et al. 2015	Deep Sea Research II	DOI: 10.1016/j.dsr2.2014.07.342	YES	GEOTRACES GA03 KN204-1 (US)	6	2011	37.61	-68.39	750	0.97	0.284468
Atlantic	Bowman et al. 2015	Deep Sea Research II	DOI: 10.1016/j.dsr2.2014.07.343	YES	GEOTRACES GA03 KN204-1 (US)	6	2011	37.61	-68.39	850	0.9	0.248938
Atlantic	Bowman et al. 2015	Deep Sea Research II	DOI: 10.1016/j.dsr2.2014.07.344	YES	GEOTRACES GA03 KN204-1 (US)	6	2011	37.61	-68.39	965	0.83	0.122106
Atlantic	Bowman et al. 2015	Deep Sea Research II	DOI: 10.1016/j.dsr2.2014.07.345	YES	GEOTRACES GA03 KN204-1 (US)	6	2011	37.61	-68.39	1085	0.89
Atlantic	Bowman et al. 2015	Deep Sea Research II	DOI: 10.1016/j.dsr2.2014.07.346	YES	GEOTRACES GA03 KN204-1 (US)	6	2011	37.61	-68.39	1200	1.06	0.204544
Atlantic	Bowman et al. 2015	Deep Sea Research II	DOI: 10.1016/j.dsr2.2014.07.347	YES	GEOTRACES GA03 KN204-1 (US)	6	2011	37.61	-68.39	1300	1.07
Atlantic	Bowman et al. 2015	Deep Sea Research II	DOI: 10.1016/j.dsr2.2014.07.348	YES	GEOTRACES GA03 KN204-1 (US)	6	2011	37.61	-68.39	1400	1.1	0.201852
Atlantic	Bowman et al. 2015	Deep Sea Research II	DOI: 10.1016/j.dsr2.2014.07.349	YES	GEOTRACES GA03 KN204-1 (US)	6	2011	37.61	-68.39	1500	0.96	0.0866649
Atlantic	Bowman et al. 2015	Deep Sea Research II	DOI: 10.1016/j.dsr2.2014.07.350	YES	GEOTRACES GA03 KN204-1 (US)	6	2011	37.61	-68.39	1600	1
Atlantic	Bowman et al. 2015	Deep Sea Research II	DOI: 10.1016/j.dsr2.2014.07.351	YES	GEOTRACES GA03 KN204-1 (US)	6	2011	37.61	-68.39	1700	1.05
Atlantic	Bowman et al. 2015	Deep Sea Research II	DOI: 10.1016/j.dsr2.2014.07.352	YES	GEOTRACES GA03 KN204-1 (US)	6	2011	37.61	-68.39	1800	0.93
Atlantic	Bowman et al. 2015	Deep Sea Research II	DOI: 10.1016/j.dsr2.2014.07.353	YES	GEOTRACES GA03 KN204-1 (US)	6	2011	37.61	-68.39	1950	0.92
Atlantic	Bowman et al. 2015	Deep Sea Research II	DOI: 10.1016/j.dsr2.2014.07.354	YES	GEOTRACES GA03 KN204-1 (US)	6	2011	37.61	-68.39	2100	0.98	0.367511
Atlantic	Bowman et al. 2015	Deep Sea Research II	DOI: 10.1016/j.dsr2.2014.07.355	YES	GEOTRACES GA03 KN204-1 (US)	6	2011	37.61	-68.39	2400	1	0.611697
Atlantic	Bowman et al. 2015	Deep Sea Research II	DOI: 10.1016/j.dsr2.2014.07.356	YES	GEOTRACES GA03 KN204-1 (US)	6	2011	37.61	-68.39	2700	1.07	0.337962
Atlantic	Bowman et al. 2015	Deep Sea Research II	DOI: 10.1016/j.dsr2.2014.07.357	YES	GEOTRACES GA03 KN204-1 (US)	6	2011	37.61	-68.39	3300	1.11	0.376291
Atlantic	Bowman et al. 2015	Deep Sea Research II	DOI: 10.1016/j.dsr2.2014.07.358	YES	GEOTRACES GA03 KN204-1 (US)	6	2011	37.61	-68.39	3600	1.23
Atlantic	Bowman et al. 2015	Deep Sea Research II	DOI: 10.1016/j.dsr2.2014.07.359	YES	GEOTRACES GA03 KN204-1 (US)	6	2011	37.61	-68.39	3800	1.35
Atlantic	Bowman et al. 2015	Deep Sea Research II	DOI: 10.1016/j.dsr2.2014.07.360	YES	GEOTRACES GA03 KN204-1 (US)	6	2011	37.61	-68.39	4000	1.38	0.644509
Atlantic	Bowman et al. 2015	Deep Sea Research II	DOI: 10.1016/j.dsr2.2014.07.361	YES	GEOTRACES GA03 KN204-1 (US)	6	2011	37.61	-68.39	4200	1.16	0.529558
Atlantic	Bowman et al. 2015	Deep Sea Research II	DOI: 10.1016/j.dsr2.2014.07.362	YES	GEOTRACES GA03 KN204-1 (US)	6	2011	37.61	-68.39	4435	1.29	0.428365
Atlantic	Bowman et al. 2015	Deep Sea Research II	DOI: 10.1016/j.dsr2.2014.07.363	YES	GEOTRACES GA03 KN204-1 (US)	6	2011	37.61	-68.39	4535	1.39	0.276637
Atlantic	Bowman et al. 2015	Deep Sea Research II	DOI: 10.1016/j.dsr2.2014.07.364	YES	GEOTRACES GA03 KN204-1 (US)	8	2011	35.42	-66.52	2	0.62
Atlantic	Bowman et al. 2015	Deep Sea Research II	DOI: 10.1016/j.dsr2.2014.07.365	YES	GEOTRACES GA03 KN204-1 (US)	8	2011	35.42	-66.52	30	0.94
Atlantic	Bowman et al. 2015	Deep Sea Research II	DOI: 10.1016/j.dsr2.2014.07.366	YES	GEOTRACES GA03 KN204-1 (US)	8	2011	35.42	-66.52	65	1.33
Atlantic	Bowman et al. 2015	Deep Sea Research II	DOI: 10.1016/j.dsr2.2014.07.367	YES	GEOTRACES GA03 KN204-1 (US)	8	2011	35.42	-66.52	110	1.3
Atlantic	Bowman et al. 2015	Deep Sea Research II	DOI: 10.1016/j.dsr2.2014.07.368	YES	GEOTRACES GA03 KN204-1 (US)	8	2011	35.42	-66.52	135	0.78
Atlantic	Bowman et al. 2015	Deep Sea Research II	DOI: 10.1016/j.dsr2.2014.07.369	YES	GEOTRACES GA03 KN204-1 (US)	8	2011	35.42	-66.52	185	0.84
Atlantic	Bowman et al. 2015	Deep Sea Research II	DOI: 10.1016/j.dsr2.2014.07.370	YES	GEOTRACES GA03 KN204-1 (US)	8	2011	35.42	-66.52	235	0.73
Atlantic	Bowman et al. 2015	Deep Sea Research II	DOI: 10.1016/j.dsr2.2014.07.371	YES	GEOTRACES GA03 KN204-1 (US)	8	2011	35.42	-66.52	289	0.67
Atlantic	Bowman et al. 2015	Deep Sea Research II	DOI: 10.1016/j.dsr2.2014.07.372	YES	GEOTRACES GA03 KN204-1 (US)	8	2011	35.42	-66.52	420	0.69
Atlantic	Bowman et al. 2015	Deep Sea Research II	DOI: 10.1016/j.dsr2.2014.07.373	YES	GEOTRACES GA03 KN204-1 (US)	8	2011	35.42	-66.52	550	0.69
Atlantic	Bowman et al. 2015	Deep Sea Research II	DOI: 10.1016/j.dsr2.2014.07.374	YES	GEOTRACES GA03 KN204-1 (US)	8	2011	35.42	-66.52	800	0.95
Atlantic	Bowman et al. 2015	Deep Sea Research II	DOI: 10.1016/j.dsr2.2014.07.375	YES	GEOTRACES GA03 KN204-1 (US)	8	2011	35.42	-66.52	1000	0.92
Atlantic	Bowman et al. 2015	Deep Sea Research II	DOI: 10.1016/j.dsr2.2014.07.376	YES	GEOTRACES GA03 KN204-1 (US)	8	2011	35.42	-66.52	1200	0.89
Atlantic	Bowman et al. 2015	Deep Sea Research II	DOI: 10.1016/j.dsr2.2014.07.377	YES	GEOTRACES GA03 KN204-1 (US)	8	2011	35.42	-66.52	1500	0.75
Atlantic	Bowman et al. 2015	Deep Sea Research II	DOI: 10.1016/j.dsr2.2014.07.378	YES	GEOTRACES GA03 KN204-1 (US)	8	2011	35.42	-66.52	1800	0.86
Atlantic	Bowman et al. 2015	Deep Sea Research II	DOI: 10.1016/j.dsr2.2014.07.379	YES	GEOTRACES GA03 KN204-1 (US)	8	2011	35.42	-66.52	2100	0.87
Atlantic	Bowman et al. 2015	Deep Sea Research II	DOI: 10.1016/j.dsr2.2014.07.380	YES	GEOTRACES GA03 KN204-1 (US)	8	2011	35.42	-66.52	2400	1.03
Atlantic	Bowman et al. 2015	Deep Sea Research II	DOI: 10.1016/j.dsr2.2014.07.381	YES	GEOTRACES GA03 KN204-1 (US)	8	2011	35.42	-66.52	2700	0.98
Atlantic	Bowman et al. 2015	Deep Sea Research II	DOI: 10.1016/j.dsr2.2014.07.382	YES	GEOTRACES GA03 KN204-1 (US)	8	2011	35.42	-66.52	3000	1.05
Atlantic	Bowman et al. 2015	Deep Sea Research II	DOI: 10.1016/j.dsr2.2014.07.383	YES	GEOTRACES GA03 KN204-1 (US)	8	2011	35.42	-66.52	3300	0.92
Atlantic	Bowman et al. 2015	Deep Sea Research II	DOI: 10.1016/j.dsr2.2014.07.384	YES	GEOTRACES GA03 KN204-1 (US)	8	2011	35.42	-66.52	3600	0.94
Atlantic	Bowman et al. 2015	Deep Sea Research II	DOI: 10.1016/j.dsr2.2014.07.385	YES	GEOTRACES GA03 KN204-1 (US)	8	2011	35.42	-66.52	3900	1
Atlantic	Bowman et al. 2015	Deep Sea Research II	DOI: 10.1016/j.dsr2.2014.07.386	YES	GEOTRACES GA03 KN204-1 (US)	8	2011	35.42	-66.52	4250	0.95
Atlantic	Bowman et al. 2015	Deep Sea Research II	DOI: 10.1016/j.dsr2.2014.07.387	YES	GEOTRACES GA03 KN204-1 (US)	8	2011	35.42	-66.52	4575	1.1
Atlantic	Bowman et al. 2015	Deep Sea Research II	DOI: 10.1016/j.dsr2.2014.07.388	YES	GEOTRACES GA03 KN204-1 (US)	8	2011	35.42	-66.52	4900	1.23
Atlantic	Bowman et al. 2015	Deep Sea Research II	DOI: 10.1016/j.dsr2.2014.07.389	YES	GEOTRACES GA03 KN204-1 (US)	10	2011	31.75	-64.17	2	0.47
Atlantic	Bowman et al. 2015	Deep Sea Research II	DOI: 10.1016/j.dsr2.2014.07.390	YES	GEOTRACES GA03 KN204-1 (US)	10	2011	31.75	-64.17	40	0.66
Atlantic	Bowman et al. 2015	Deep Sea Research II	DOI: 10.1016/j.dsr2.2014.07.391	YES	GEOTRACES GA03 KN204-1 (US)	10	2011	31.75	-64.17	65	0.68
Atlantic	Bowman et al. 2015	Deep Sea Research II	DOI: 10.1016/j.dsr2.2014.07.392	YES	GEOTRACES GA03 KN204-1 (US)	10	2011	31.75	-64.17	84	0.71
Atlantic	Bowman et al. 2015	Deep Sea Research II	DOI: 10.1016/j.dsr2.2014.07.393	YES	GEOTRACES GA03 KN204-1 (US)	10	2011	31.75	-64.17	96	0.72
Atlantic	Bowman et al. 2015	Deep Sea Research II	DOI: 10.1016/j.dsr2.2014.07.394	YES	GEOTRACES GA03 KN204-1 (US)	10	2011	31.75	-64.17	135	0.67
Atlantic	Bowman et al. 2015	Deep Sea Research II	DOI: 10.1016/j.dsr2.2014.07.395	YES	GEOTRACES GA03 KN204-1 (US)	10	2011	31.75	-64.17	185	0.59
Atlantic	Bowman et al. 2015	Deep Sea Research II	DOI: 10.1016/j.dsr2.2014.07.396	YES	GEOTRACES GA03 KN204-1 (US)	10	2011	31.75	-64.17	235	0.62
Atlantic	Bowman et al. 2015	Deep Sea Research II	DOI: 10.1016/j.dsr2.2014.07.397	YES	GEOTRACES GA03 KN204-1 (US)	10	2011	31.75	-64.17	285	0.65
Atlantic	Bowman et al. 2015	Deep Sea Research II	DOI: 10.1016/j.dsr2.2014.07.398	YES	GEOTRACES GA03 KN204-1 (US)	10	2011	31.75	-64.17	345	0.63
Atlantic	Bowman et al. 2015	Deep Sea Research II	DOI: 10.1016/j.dsr2.2014.07.399	YES	GEOTRACES GA03 KN204-1 (US)	10	2011	31.75	-64.17	420	0.87
Atlantic	Bowman et al. 2015	Deep Sea Research II	DOI: 10.1016/j.dsr2.2014.07.400	YES	GEOTRACES GA03 KN204-1 (US)	10	2011	31.75	-64.17	500	0.89
Atlantic	Bowman et al. 2015	Deep Sea Research II	DOI: 10.1016/j.dsr2.2014.07.401	YES	GEOTRACES GA03 KN204-1 (US)	10	2011	31.75	-64.17	575	0.89
Atlantic	Bowman et al. 2015	Deep Sea Research II	DOI: 10.1016/j.dsr2.2014.07.402	YES	GEOTRACES GA03 KN204-1 (US)	10	2011	31.75	-64.17	666	1.32
Atlantic	Bowman et al. 2015	Deep Sea Research II	DOI: 10.1016/j.dsr2.2014.07.403	YES	GEOTRACES GA03 KN204-1 (US)	10	2011	31.75	-64.17	800	1.5
Atlantic	Bowman et al. 2015	Deep Sea Research II	DOI: 10.1016/j.dsr2.2014.07.404	YES	GEOTRACES GA03 KN204-1 (US)	10	2011	31.75	-64.17	874	1.62
Atlantic	Bowman et al. 2015	Deep Sea Research II	DOI: 10.1016/j.dsr2.2014.07.405	YES	GEOTRACES GA03 KN204-1 (US)	10	2011	31.75	-64.17	971	1.46
Atlantic	Bowman et al. 2015	Deep Sea Research II	DOI: 10.1016/j.dsr2.2014.07.406	YES	GEOTRACES GA03 KN204-1 (US)	10	2011	31.75	-64.17	1075	1.31
Atlantic	Bowman et al. 2015	Deep Sea Research II	DOI: 10.1016/j.dsr2.2014.07.407	YES	GEOTRACES GA03 KN204-1 (US)	10	2011	31.75	-64.17	1200	1.18
Atlantic	Bowman et al. 2015	Deep Sea Research II	DOI: 10.1016/j.dsr2.2014.07.408	YES	GEOTRACES GA03 KN204-1 (US)	10	2011	31.75	-64.17	1350
Atlantic	Bowman et al. 2015	Deep Sea Research II	DOI: 10.1016/j.dsr2.2014.07.409	YES	GEOTRACES GA03 KN204-1 (US)	10	2011	31.75	-64.17	1500	1.08
Atlantic	Bowman et al. 2015	Deep Sea Research II	DOI: 10.1016/j.dsr2.2014.07.410	YES	GEOTRACES GA03 KN204-1 (US)	10	2011	31.75	-64.17	1650
Atlantic	Bowman et al. 2015	Deep Sea Research II	DOI: 10.1016/j.dsr2.2014.07.411	YES	GEOTRACES GA03 KN204-1 (US)	10	2011	31.75	-64.17	1800	1.21
Atlantic	Bowman et al. 2015	Deep Sea Research II	DOI: 10.1016/j.dsr2.2014.07.412	YES	GEOTRACES GA03 KN204-1 (US)	10	2011	31.75	-64.17	1950	1.02
Atlantic	Bowman et al. 2015	Deep Sea Research II	DOI: 10.1016/j.dsr2.2014.07.413	YES	GEOTRACES GA03 KN204-1 (US)	10	2011	31.75	-64.17	2101	0.98
Atlantic	Bowman et al. 2015	Deep Sea Research II	DOI: 10.1016/j.dsr2.2014.07.414	YES	GEOTRACES GA03 KN204-1 (US)	10	2011	31.75	-64.17	2300	0.93
Atlantic	Bowman et al. 2015	Deep Sea Research II	DOI: 10.1016/j.dsr2.2014.07.415	YES	GEOTRACES GA03 KN204-1 (US)	10	2011	31.75	-64.17	2500	1.06
Atlantic	Bowman et al. 2015	Deep Sea Research II	DOI: 10.1016/j.dsr2.2014.07.416	YES	GEOTRACES GA03 KN204-1 (US)	10	2011	31.75	-64.17	2700
Atlantic	Bowman et al. 2015	Deep Sea Research II	DOI: 10.1016/j.dsr2.2014.07.417	YES	GEOTRACES GA03 KN204-1 (US)	10	2011	31.75	-64.17	3000	1.1
Atlantic	Bowman et al. 2015	Deep Sea Research II	DOI: 10.1016/j.dsr2.2014.07.418	YES	GEOTRACES GA03 KN204-1 (US)	10	2011	31.75	-64.17	3300	1.05
Atlantic	Bowman et al. 2015	Deep Sea Research II	DOI: 10.1016/j.dsr2.2014.07.419	YES	GEOTRACES GA03 KN204-1 (US)	10	2011	31.75	-64.17	3601	1.16
Atlantic	Bowman et al. 2015	Deep Sea Research II	DOI: 10.1016/j.dsr2.2014.07.420	YES	GEOTRACES GA03 KN204-1 (US)	10	2011	31.75	-64.17	3900	1.12
Atlantic	Bowman et al. 2015	Deep Sea Research II	DOI: 10.1016/j.dsr2.2014.07.421	YES	GEOTRACES GA03 KN204-1 (US)	10	2011	31.75	-64.17	4200	1.09
Atlantic	Bowman et al. 2015	Deep Sea Research II	DOI: 10.1016/j.dsr2.2014.07.422	YES	GEOTRACES GA03 KN204-1 (US)	10	2011	31.75	-64.17	4350	1.09
Atlantic	Bowman et al. 2015	Deep Sea Research II	DOI: 10.1016/j.dsr2.2014.07.423	YES	GEOTRACES GA03 KN204-1 (US)	10	2011	31.75	-64.17	4440	1.17
Atlantic	Bowman et al. 2015	Deep Sea Research II	DOI: 10.1016/j.dsr2.2014.07.424	YES	GEOTRACES GA03 KN204-1 (US)	10	2011	31.75	-64.17	4490	1.13
Atlantic	Bowman et al. 2015	Deep Sea Research II	DOI: 10.1016/j.dsr2.2014.07.425	YES	GEOTRACES GA03 KN204-1 (US)	10	2011	31.75	-64.17	4531	1.16
Atlantic	Bowman et al. 2015	Deep Sea Research II	DOI: 10.1016/j.dsr2.2014.07.426	YES	GEOTRACES GA03 KN204-1 (US)	11	2011	30.82	-60.78	2	0.51
Atlantic	Bowman et al. 2015	Deep Sea Research II	DOI: 10.1016/j.dsr2.2014.07.427	YES	GEOTRACES GA03 KN204-1 (US)	11	2011	30.82	-60.78	60	1.67
Atlantic	Bowman et al. 2015	Deep Sea Research II	DOI: 10.1016/j.dsr2.2014.07.428	YES	GEOTRACES GA03 KN204-1 (US)	11	2011	30.82	-60.78	93	0.72
Atlantic	Bowman et al. 2015	Deep Sea Research II	DOI: 10.1016/j.dsr2.2014.07.429	YES	GEOTRACES GA03 KN204-1 (US)	11	2011	30.82	-60.78	135	0.72
Atlantic	Bowman et al. 2015	Deep Sea Research II	DOI: 10.1016/j.dsr2.2014.07.430	YES	GEOTRACES GA03 KN204-1 (US)	11	2011	30.82	-60.78	184	0.71
Atlantic	Bowman et al. 2015	Deep Sea Research II	DOI: 10.1016/j.dsr2.2014.07.431	YES	GEOTRACES GA03 KN204-1 (US)	11	2011	30.82	-60.78	236	0.74
Atlantic	Bowman et al. 2015	Deep Sea Research II	DOI: 10.1016/j.dsr2.2014.07.432	YES	GEOTRACES GA03 KN204-1 (US)	11	2011	30.82	-60.78	286	0.73
Atlantic	Bowman et al. 2015	Deep Sea Research II	DOI: 10.1016/j.dsr2.2014.07.433	YES	GEOTRACES GA03 KN204-1 (US)	11	2011	30.82	-60.78	349	0.78
Atlantic	Bowman et al. 2015	Deep Sea Research II	DOI: 10.1016/j.dsr2.2014.07.434	YES	GEOTRACES GA03 KN204-1 (US)	11	2011	30.82	-60.78	420	0.86
Atlantic	Bowman et al. 2015	Deep Sea Research II	DOI: 10.1016/j.dsr2.2014.07.435	YES	GEOTRACES GA03 KN204-1 (US)	11	2011	30.82	-60.78	530	1.09
Atlantic	Bowman et al. 2015	Deep Sea Research II	DOI: 10.1016/j.dsr2.2014.07.436	YES	GEOTRACES GA03 KN204-1 (US)	11	2011	30.82	-60.78	665	1.22	0.156785
Atlantic	Bowman et al. 2015	Deep Sea Research II	DOI: 10.1016/j.dsr2.2014.07.437	YES	GEOTRACES GA03 KN204-1 (US)	11	2011	30.82	-60.78	799	1.39
Atlantic	Bowman et al. 2015	Deep Sea Research II	DOI: 10.1016/j.dsr2.2014.07.438	YES	GEOTRACES GA03 KN204-1 (US)	11	2011	30.82	-60.78	1000	1.25
Atlantic	Bowman et al. 2015	Deep Sea Research II	DOI: 10.1016/j.dsr2.2014.07.439	YES	GEOTRACES GA03 KN204-1 (US)	12	2011	29.7	-56.82	2	0.43
Atlantic	Bowman et al. 2015	Deep Sea Research II	DOI: 10.1016/j.dsr2.2014.07.440	YES	GEOTRACES GA03 KN204-1 (US)	12	2011	29.7	-56.82	40	0.96	0.0711052
Atlantic	Bowman et al. 2015	Deep Sea Research II	DOI: 10.1016/j.dsr2.2014.07.441	YES	GEOTRACES GA03 KN204-1 (US)	12	2011	29.7	-56.82	65	0.78	0.0528606
Atlantic	Bowman et al. 2015	Deep Sea Research II	DOI: 10.1016/j.dsr2.2014.07.442	YES	GEOTRACES GA03 KN204-1 (US)	12	2011	29.7	-56.82	99	0.97
Atlantic	Bowman et al. 2015	Deep Sea Research II	DOI: 10.1016/j.dsr2.2014.07.443	YES	GEOTRACES GA03 KN204-1 (US)	12	2011	29.7	-56.82	136	0.9
Atlantic	Bowman et al. 2015	Deep Sea Research II	DOI: 10.1016/j.dsr2.2014.07.444	YES	GEOTRACES GA03 KN204-1 (US)	12	2011	29.7	-56.82	185	0.91
Atlantic	Bowman et al. 2015	Deep Sea Research II	DOI: 10.1016/j.dsr2.2014.07.445	YES	GEOTRACES GA03 KN204-1 (US)	12	2011	29.7	-56.82	234	0.89	0.0564389
Atlantic	Bowman et al. 2015	Deep Sea Research II	DOI: 10.1016/j.dsr2.2014.07.446	YES	GEOTRACES GA03 KN204-1 (US)	12	2011	29.7	-56.82	285	0.86
Atlantic	Bowman et al. 2015	Deep Sea Research II	DOI: 10.1016/j.dsr2.2014.07.447	YES	GEOTRACES GA03 KN204-1 (US)	12	2011	29.7	-56.82	351
Atlantic	Bowman et al. 2015	Deep Sea Research II	DOI: 10.1016/j.dsr2.2014.07.448	YES	GEOTRACES GA03 KN204-1 (US)	12	2011	29.7	-56.82	421	1.06
Atlantic	Bowman et al. 2015	Deep Sea Research II	DOI: 10.1016/j.dsr2.2014.07.449	YES	GEOTRACES GA03 KN204-1 (US)	12	2011	29.7	-56.82	500	1.31
Atlantic	Bowman et al. 2015	Deep Sea Research II	DOI: 10.1016/j.dsr2.2014.07.450	YES	GEOTRACES GA03 KN204-1 (US)	12	2011	29.7	-56.82	666	1.45
Atlantic	Bowman et al. 2015	Deep Sea Research II	DOI: 10.1016/j.dsr2.2014.07.451	YES	GEOTRACES GA03 KN204-1 (US)	12	2011	29.7	-56.82	750	1.49
Atlantic	Bowman et al. 2015	Deep Sea Research II	DOI: 10.1016/j.dsr2.2014.07.452	YES	GEOTRACES GA03 KN204-1 (US)	12	2011	29.7	-56.82	875	1.4
Atlantic	Bowman et al. 2015	Deep Sea Research II	DOI: 10.1016/j.dsr2.2014.07.453	YES	GEOTRACES GA03 KN204-1 (US)	12	2011	29.7	-56.82	1000
Atlantic	Bowman et al. 2015	Deep Sea Research II	DOI: 10.1016/j.dsr2.2014.07.454	YES	GEOTRACES GA03 KN204-1 (US)	12	2011	29.7	-56.82	1100	1.19
Atlantic	Bowman et al. 2015	Deep Sea Research II	DOI: 10.1016/j.dsr2.2014.07.455	YES	GEOTRACES GA03 KN204-1 (US)	12	2011	29.7	-56.82	1200	1.14
Atlantic	Bowman et al. 2015	Deep Sea Research II	DOI: 10.1016/j.dsr2.2014.07.456	YES	GEOTRACES GA03 KN204-1 (US)	12	2011	29.7	-56.82	1350	1.18
Atlantic	Bowman et al. 2015	Deep Sea Research II	DOI: 10.1016/j.dsr2.2014.07.457	YES	GEOTRACES GA03 KN204-1 (US)	12	2011	29.7	-56.82	1500
Atlantic	Bowman et al. 2015	Deep Sea Research II	DOI: 10.1016/j.dsr2.2014.07.458	YES	GEOTRACES GA03 KN204-1 (US)	12	2011	29.7	-56.82	1651	1.04	0.0425227
Atlantic	Bowman et al. 2015	Deep Sea Research II	DOI: 10.1016/j.dsr2.2014.07.459	YES	GEOTRACES GA03 KN204-1 (US)	12	2011	29.7	-56.82	1800	1
Atlantic	Bowman et al. 2015	Deep Sea Research II	DOI: 10.1016/j.dsr2.2014.07.460	YES	GEOTRACES GA03 KN204-1 (US)	12	2011	29.7	-56.82	1950	0.96
Atlantic	Bowman et al. 2015	Deep Sea Research II	DOI: 10.1016/j.dsr2.2014.07.461	YES	GEOTRACES GA03 KN204-1 (US)	12	2011	29.7	-56.82	2100	1.02
Atlantic	Bowman et al. 2015	Deep Sea Research II	DOI: 10.1016/j.dsr2.2014.07.462	YES	GEOTRACES GA03 KN204-1 (US)	12	2011	29.7	-56.82	2250	1.05
Atlantic	Bowman et al. 2015	Deep Sea Research II	DOI: 10.1016/j.dsr2.2014.07.463	YES	GEOTRACES GA03 KN204-1 (US)	12	2011	29.7	-56.82	2400	1.07
Atlantic	Bowman et al. 2015	Deep Sea Research II	DOI: 10.1016/j.dsr2.2014.07.464	YES	GEOTRACES GA03 KN204-1 (US)	12	2011	29.7	-56.82	2550	1.15
Atlantic	Bowman et al. 2015	Deep Sea Research II	DOI: 10.1016/j.dsr2.2014.07.465	YES	GEOTRACES GA03 KN204-1 (US)	12	2011	29.7	-56.82	2700	1.19
Atlantic	Bowman et al. 2015	Deep Sea Research II	DOI: 10.1016/j.dsr2.2014.07.466	YES	GEOTRACES GA03 KN204-1 (US)	12	2011	29.7	-56.82	3000	1.11	0.314105
Atlantic	Bowman et al. 2015	Deep Sea Research II	DOI: 10.1016/j.dsr2.2014.07.467	YES	GEOTRACES GA03 KN204-1 (US)	12	2011	29.7	-56.82	3300	1.05
Atlantic	Bowman et al. 2015	Deep Sea Research II	DOI: 10.1016/j.dsr2.2014.07.468	YES	GEOTRACES GA03 KN204-1 (US)	12	2011	29.7	-56.82	3600	1.2
Atlantic	Bowman et al. 2015	Deep Sea Research II	DOI: 10.1016/j.dsr2.2014.07.469	YES	GEOTRACES GA03 KN204-1 (US)	12	2011	29.7	-56.82	3900	1.43	0.233427
Atlantic	Bowman et al. 2015	Deep Sea Research II	DOI: 10.1016/j.dsr2.2014.07.470	YES	GEOTRACES GA03 KN204-1 (US)	12	2011	29.7	-56.82	4300	1.17	0.277391
Atlantic	Bowman et al. 2015	Deep Sea Research II	DOI: 10.1016/j.dsr2.2014.07.471	YES	GEOTRACES GA03 KN204-1 (US)	12	2011	29.7	-56.82	4700	1.23	0.391379
Atlantic	Bowman et al. 2015	Deep Sea Research II	DOI: 10.1016/j.dsr2.2014.07.472	YES	GEOTRACES GA03 KN204-1 (US)	12	2011	29.7	-56.82	5100	1.19	0.431979
Atlantic	Bowman et al. 2015	Deep Sea Research II	DOI: 10.1016/j.dsr2.2014.07.473	YES	GEOTRACES GA03 KN204-1 (US)	12	2011	29.7	-56.82	5400	1.2
Atlantic	Bowman et al. 2015	Deep Sea Research II	DOI: 10.1016/j.dsr2.2014.07.474	YES	GEOTRACES GA03 KN204-1 (US)	12	2011	29.7	-56.82	5462	1.2
Atlantic	Bowman et al. 2015	Deep Sea Research II	DOI: 10.1016/j.dsr2.2014.07.475	YES	GEOTRACES GA03 KN204-1 (US)	12	2011	29.7	-56.82	5615	1.3
Atlantic	Bowman et al. 2015	Deep Sea Research II	DOI: 10.1016/j.dsr2.2014.07.476	YES	GEOTRACES GA03 KN204-1 (US)	13	2011	28.64	-53.22	2	0.42
Atlantic	Bowman et al. 2015	Deep Sea Research II	DOI: 10.1016/j.dsr2.2014.07.477	YES	GEOTRACES GA03 KN204-1 (US)	13	2011	28.64	-53.22	41	1.32
Atlantic	Bowman et al. 2015	Deep Sea Research II	DOI: 10.1016/j.dsr2.2014.07.478	YES	GEOTRACES GA03 KN204-1 (US)	13	2011	28.64	-53.22	100	0.56
Atlantic	Bowman et al. 2015	Deep Sea Research II	DOI: 10.1016/j.dsr2.2014.07.479	YES	GEOTRACES GA03 KN204-1 (US)	13	2011	28.64	-53.22	135	0.55
Atlantic	Bowman et al. 2015	Deep Sea Research II	DOI: 10.1016/j.dsr2.2014.07.480	YES	GEOTRACES GA03 KN204-1 (US)	13	2011	28.64	-53.22	185	0.66
Atlantic	Bowman et al. 2015	Deep Sea Research II	DOI: 10.1016/j.dsr2.2014.07.481	YES	GEOTRACES GA03 KN204-1 (US)	13	2011	28.64	-53.22	235	0.63
Atlantic	Bowman et al. 2015	Deep Sea Research II	DOI: 10.1016/j.dsr2.2014.07.482	YES	GEOTRACES GA03 KN204-1 (US)	13	2011	28.64	-53.22	285	0.63
Atlantic	Bowman et al. 2015	Deep Sea Research II	DOI: 10.1016/j.dsr2.2014.07.483	YES	GEOTRACES GA03 KN204-1 (US)	13	2011	28.64	-53.22	350	0.64
Atlantic	Bowman et al. 2015	Deep Sea Research II	DOI: 10.1016/j.dsr2.2014.07.484	YES	GEOTRACES GA03 KN204-1 (US)	13	2011	28.64	-53.22	420	0.8
Atlantic	Bowman et al. 2015	Deep Sea Research II	DOI: 10.1016/j.dsr2.2014.07.485	YES	GEOTRACES GA03 KN204-1 (US)	13	2011	28.64	-53.22	530
Atlantic	Bowman et al. 2015	Deep Sea Research II	DOI: 10.1016/j.dsr2.2014.07.486	YES	GEOTRACES GA03 KN204-1 (US)	13	2011	28.64	-53.22	664	1.04
Atlantic	Bowman et al. 2015	Deep Sea Research II	DOI: 10.1016/j.dsr2.2014.07.487	YES	GEOTRACES GA03 KN204-1 (US)	13	2011	28.64	-53.22	850	1.14
Atlantic	Bowman et al. 2015	Deep Sea Research II	DOI: 10.1016/j.dsr2.2014.07.488	YES	GEOTRACES GA03 KN204-1 (US)	13	2011	28.64	-53.22	1000	1.11
Atlantic	Bowman et al. 2015	Deep Sea Research II	DOI: 10.1016/j.dsr2.2014.07.489	YES	GEOTRACES GA03 KN204-1 (US)	14	2011	27.58	-49.63	2	0.57
Atlantic	Bowman et al. 2015	Deep Sea Research II	DOI: 10.1016/j.dsr2.2014.07.490	YES	GEOTRACES GA03 KN204-1 (US)	14	2011	27.58	-49.63	40	0.82
Atlantic	Bowman et al. 2015	Deep Sea Research II	DOI: 10.1016/j.dsr2.2014.07.491	YES	GEOTRACES GA03 KN204-1 (US)	14	2011	27.58	-49.63	70	0.58
Atlantic	Bowman et al. 2015	Deep Sea Research II	DOI: 10.1016/j.dsr2.2014.07.492	YES	GEOTRACES GA03 KN204-1 (US)	14	2011	27.58	-49.63	100	0.46
Atlantic	Bowman et al. 2015	Deep Sea Research II	DOI: 10.1016/j.dsr2.2014.07.493	YES	GEOTRACES GA03 KN204-1 (US)	14	2011	27.58	-49.63	115	0.45
Atlantic	Bowman et al. 2015	Deep Sea Research II	DOI: 10.1016/j.dsr2.2014.07.494	YES	GEOTRACES GA03 KN204-1 (US)	14	2011	27.58	-49.63	135	0.43
Atlantic	Bowman et al. 2015	Deep Sea Research II	DOI: 10.1016/j.dsr2.2014.07.495	YES	GEOTRACES GA03 KN204-1 (US)	14	2011	27.58	-49.63	185	0.56
Atlantic	Bowman et al. 2015	Deep Sea Research II	DOI: 10.1016/j.dsr2.2014.07.496	YES	GEOTRACES GA03 KN204-1 (US)	14	2011	27.58	-49.63	235	0.54
Atlantic	Bowman et al. 2015	Deep Sea Research II	DOI: 10.1016/j.dsr2.2014.07.497	YES	GEOTRACES GA03 KN204-1 (US)	14	2011	27.58	-49.63	285	0.55
Atlantic	Bowman et al. 2015	Deep Sea Research II	DOI: 10.1016/j.dsr2.2014.07.498	YES	GEOTRACES GA03 KN204-1 (US)	14	2011	27.58	-49.63	350	0.61
Atlantic	Bowman et al. 2015	Deep Sea Research II	DOI: 10.1016/j.dsr2.2014.07.499	YES	GEOTRACES GA03 KN204-1 (US)	14	2011	27.58	-49.63	430	0.65
Atlantic	Bowman et al. 2015	Deep Sea Research II	DOI: 10.1016/j.dsr2.2014.07.500	YES	GEOTRACES GA03 KN204-1 (US)	14	2011	27.58	-49.63	550	0.7
Atlantic	Bowman et al. 2015	Deep Sea Research II	DOI: 10.1016/j.dsr2.2014.07.501	YES	GEOTRACES GA03 KN204-1 (US)	14	2011	27.58	-49.63	650	1.03
Atlantic	Bowman et al. 2015	Deep Sea Research II	DOI: 10.1016/j.dsr2.2014.07.502	YES	GEOTRACES GA03 KN204-1 (US)	14	2011	27.58	-49.63	775	1.25	0.344782
Atlantic	Bowman et al. 2015	Deep Sea Research II	DOI: 10.1016/j.dsr2.2014.07.503	YES	GEOTRACES GA03 KN204-1 (US)	14	2011	27.58	-49.63	905	1.32
Atlantic	Bowman et al. 2015	Deep Sea Research II	DOI: 10.1016/j.dsr2.2014.07.504	YES	GEOTRACES GA03 KN204-1 (US)	14	2011	27.58	-49.63	1200	1.1
Atlantic	Bowman et al. 2015	Deep Sea Research II	DOI: 10.1016/j.dsr2.2014.07.505	YES	GEOTRACES GA03 KN204-1 (US)	14	2011	27.58	-49.63	1449	1.1	0.229124
Atlantic	Bowman et al. 2015	Deep Sea Research II	DOI: 10.1016/j.dsr2.2014.07.506	YES	GEOTRACES GA03 KN204-1 (US)	14	2011	27.58	-49.63	1800	1.09
Atlantic	Bowman et al. 2015	Deep Sea Research II	DOI: 10.1016/j.dsr2.2014.07.507	YES	GEOTRACES GA03 KN204-1 (US)	14	2011	27.58	-49.63	2100	1.07
Atlantic	Bowman et al. 2015	Deep Sea Research II	DOI: 10.1016/j.dsr2.2014.07.508	YES	GEOTRACES GA03 KN204-1 (US)	14	2011	27.58	-49.63	2400		0.116025
Atlantic	Bowman et al. 2015	Deep Sea Research II	DOI: 10.1016/j.dsr2.2014.07.509	YES	GEOTRACES GA03 KN204-1 (US)	14	2011	27.58	-49.63	2700
Atlantic	Bowman et al. 2015	Deep Sea Research II	DOI: 10.1016/j.dsr2.2014.07.510	YES	GEOTRACES GA03 KN204-1 (US)	14	2011	27.58	-49.63	3000	1.17
Atlantic	Bowman et al. 2015	Deep Sea Research II	DOI: 10.1016/j.dsr2.2014.07.511	YES	GEOTRACES GA03 KN204-1 (US)	14	2011	27.58	-49.63	3400	1.26
Atlantic	Bowman et al. 2015	Deep Sea Research II	DOI: 10.1016/j.dsr2.2014.07.512	YES	GEOTRACES GA03 KN204-1 (US)	14	2011	27.58	-49.63	3800	1.23
Atlantic	Bowman et al. 2015	Deep Sea Research II	DOI: 10.1016/j.dsr2.2014.07.513	YES	GEOTRACES GA03 KN204-1 (US)	14	2011	27.58	-49.63	4225	0.9
Atlantic	Bowman et al. 2015	Deep Sea Research II	DOI: 10.1016/j.dsr2.2014.07.514	YES	GEOTRACES GA03 KN204-1 (US)	15	2011	26.86	-47.23	2	0.45	0.295614
Atlantic	Bowman et al. 2015	Deep Sea Research II	DOI: 10.1016/j.dsr2.2014.07.515	YES	GEOTRACES GA03 KN204-1 (US)	15	2011	26.86	-47.23	50	0.62	0.160619
Atlantic	Bowman et al. 2015	Deep Sea Research II	DOI: 10.1016/j.dsr2.2014.07.516	YES	GEOTRACES GA03 KN204-1 (US)	15	2011	26.86	-47.23	95	0.39
Atlantic	Bowman et al. 2015	Deep Sea Research II	DOI: 10.1016/j.dsr2.2014.07.517	YES	GEOTRACES GA03 KN204-1 (US)	15	2011	26.86	-47.23	136	0.62
Atlantic	Bowman et al. 2015	Deep Sea Research II	DOI: 10.1016/j.dsr2.2014.07.518	YES	GEOTRACES GA03 KN204-1 (US)	15	2011	26.86	-47.23	185	0.75
Atlantic	Bowman et al. 2015	Deep Sea Research II	DOI: 10.1016/j.dsr2.2014.07.519	YES	GEOTRACES GA03 KN204-1 (US)	15	2011	26.86	-47.23	235	0.72	0.334581
Atlantic	Bowman et al. 2015	Deep Sea Research II	DOI: 10.1016/j.dsr2.2014.07.520	YES	GEOTRACES GA03 KN204-1 (US)	15	2011	26.86	-47.23	285	0.87	0.390389
Atlantic	Bowman et al. 2015	Deep Sea Research II	DOI: 10.1016/j.dsr2.2014.07.521	YES	GEOTRACES GA03 KN204-1 (US)	15	2011	26.86	-47.23	350	0.64	0.177938
Atlantic	Bowman et al. 2015	Deep Sea Research II	DOI: 10.1016/j.dsr2.2014.07.522	YES	GEOTRACES GA03 KN204-1 (US)	15	2011	26.86	-47.23	421	0.71
Atlantic	Bowman et al. 2015	Deep Sea Research II	DOI: 10.1016/j.dsr2.2014.07.523	YES	GEOTRACES GA03 KN204-1 (US)	15	2011	26.86	-47.23	530
Atlantic	Bowman et al. 2015	Deep Sea Research II	DOI: 10.1016/j.dsr2.2014.07.524	YES	GEOTRACES GA03 KN204-1 (US)	15	2011	26.86	-47.23	665	0.86
Atlantic	Bowman et al. 2015	Deep Sea Research II	DOI: 10.1016/j.dsr2.2014.07.525	YES	GEOTRACES GA03 KN204-1 (US)	15	2011	26.86	-47.23	800	1.06	0.300577
Atlantic	Bowman et al. 2015	Deep Sea Research II	DOI: 10.1016/j.dsr2.2014.07.526	YES	GEOTRACES GA03 KN204-1 (US)	15	2011	26.86	-47.23	1000	1.22
Atlantic	Bowman et al. 2015	Deep Sea Research II	DOI: 10.1016/j.dsr2.2014.07.527	YES	GEOTRACES GA03 KN204-1 (US)	16	2011	26.14	-44.83	2	0.45
Atlantic	Bowman et al. 2015	Deep Sea Research II	DOI: 10.1016/j.dsr2.2014.07.528	YES	GEOTRACES GA03 KN204-1 (US)	16	2011	26.14	-44.83	40	0.64	0.0760263
Atlantic	Bowman et al. 2015	Deep Sea Research II	DOI: 10.1016/j.dsr2.2014.07.529	YES	GEOTRACES GA03 KN204-1 (US)	16	2011	26.14	-44.83	56	0.87	0.0479154
Atlantic	Bowman et al. 2015	Deep Sea Research II	DOI: 10.1016/j.dsr2.2014.07.530	YES	GEOTRACES GA03 KN204-1 (US)	16	2011	26.14	-44.83	92	0.63	0.153171
Atlantic	Bowman et al. 2015	Deep Sea Research II	DOI: 10.1016/j.dsr2.2014.07.531	YES	GEOTRACES GA03 KN204-1 (US)	16	2011	26.14	-44.83	108	0.58	0.173517
Atlantic	Bowman et al. 2015	Deep Sea Research II	DOI: 10.1016/j.dsr2.2014.07.532	YES	GEOTRACES GA03 KN204-1 (US)	16	2011	26.14	-44.83	135	0.67	0.412993
Atlantic	Bowman et al. 2015	Deep Sea Research II	DOI: 10.1016/j.dsr2.2014.07.533	YES	GEOTRACES GA03 KN204-1 (US)	16	2011	26.14	-44.83	185	0.67	0.214491
Atlantic	Bowman et al. 2015	Deep Sea Research II	DOI: 10.1016/j.dsr2.2014.07.534	YES	GEOTRACES GA03 KN204-1 (US)	16	2011	26.14	-44.83	235	0.84	0.126872
Atlantic	Bowman et al. 2015	Deep Sea Research II	DOI: 10.1016/j.dsr2.2014.07.535	YES	GEOTRACES GA03 KN204-1 (US)	16	2011	26.14	-44.83	285	0.86	0.232301
Atlantic	Bowman et al. 2015	Deep Sea Research II	DOI: 10.1016/j.dsr2.2014.07.536	YES	GEOTRACES GA03 KN204-1 (US)	16	2011	26.14	-44.83	338	0.86	0.338838
Atlantic	Bowman et al. 2015	Deep Sea Research II	DOI: 10.1016/j.dsr2.2014.07.537	YES	GEOTRACES GA03 KN204-1 (US)	16	2011	26.14	-44.83	420	0.98	0.264888
Atlantic	Bowman et al. 2015	Deep Sea Research II	DOI: 10.1016/j.dsr2.2014.07.538	YES	GEOTRACES GA03 KN204-1 (US)	16	2011	26.14	-44.83	510	0.97	0.194411
Atlantic	Bowman et al. 2015	Deep Sea Research II	DOI: 10.1016/j.dsr2.2014.07.539	YES	GEOTRACES GA03 KN204-1 (US)	16	2011	26.14	-44.83	601	1.2	0.15759
Atlantic	Bowman et al. 2015	Deep Sea Research II	DOI: 10.1016/j.dsr2.2014.07.540	YES	GEOTRACES GA03 KN204-1 (US)	16	2011	26.14	-44.83	800	1.24	0.229365
Atlantic	Bowman et al. 2015	Deep Sea Research II	DOI: 10.1016/j.dsr2.2014.07.541	YES	GEOTRACES GA03 KN204-1 (US)	16	2011	26.14	-44.83	965	1.18	0.206562
Atlantic	Bowman et al. 2015	Deep Sea Research II	DOI: 10.1016/j.dsr2.2014.07.542	YES	GEOTRACES GA03 KN204-1 (US)	16	2011	26.14	-44.83	1200	1.01
Atlantic	Bowman et al. 2015	Deep Sea Research II	DOI: 10.1016/j.dsr2.2014.07.543	YES	GEOTRACES GA03 KN204-1 (US)	16	2011	26.14	-44.83	1500	1.12
Atlantic	Bowman et al. 2015	Deep Sea Research II	DOI: 10.1016/j.dsr2.2014.07.544	YES	GEOTRACES GA03 KN204-1 (US)	16	2011	26.14	-44.83	1650	1.17
Atlantic	Bowman et al. 2015	Deep Sea Research II	DOI: 10.1016/j.dsr2.2014.07.545	YES	GEOTRACES GA03 KN204-1 (US)	16	2011	26.14	-44.83	1800	1.08	0.305708
Atlantic	Bowman et al. 2015	Deep Sea Research II	DOI: 10.1016/j.dsr2.2014.07.546	YES	GEOTRACES GA03 KN204-1 (US)	16	2011	26.14	-44.83	1950	1.08
Atlantic	Bowman et al. 2015	Deep Sea Research II	DOI: 10.1016/j.dsr2.2014.07.547	YES	GEOTRACES GA03 KN204-1 (US)	16	2011	26.14	-44.83	2100	1.21
Atlantic	Bowman et al. 2015	Deep Sea Research II	DOI: 10.1016/j.dsr2.2014.07.548	YES	GEOTRACES GA03 KN204-1 (US)	16	2011	26.14	-44.83	2250	1.21	0.161634
Atlantic	Bowman et al. 2015	Deep Sea Research II	DOI: 10.1016/j.dsr2.2014.07.549	YES	GEOTRACES GA03 KN204-1 (US)	16	2011	26.14	-44.83	2400	1.07	0.269533
Atlantic	Bowman et al. 2015	Deep Sea Research II	DOI: 10.1016/j.dsr2.2014.07.550	YES	GEOTRACES GA03 KN204-1 (US)	16	2011	26.14	-44.83	2700	1.1	0.214407
Atlantic	Bowman et al. 2015	Deep Sea Research II	DOI: 10.1016/j.dsr2.2014.07.551	YES	GEOTRACES GA03 KN204-1 (US)	16	2011	26.14	-44.83	3000	1.15	0.619615
Atlantic	Bowman et al. 2015	Deep Sea Research II	DOI: 10.1016/j.dsr2.2014.07.552	YES	GEOTRACES GA03 KN204-1 (US)	16	2011	26.14	-44.83	3224	0.85	0.309381
Atlantic	Bowman et al. 2015	Deep Sea Research II	DOI: 10.1016/j.dsr2.2014.07.553	YES	GEOTRACES GA03 KN204-1 (US)	16	2011	26.14	-44.83	3255	0.89	0.286669
Atlantic	Bowman et al. 2015	Deep Sea Research II	DOI: 10.1016/j.dsr2.2014.07.554	YES	GEOTRACES GA03 KN204-1 (US)	16	2011	26.14	-44.83	3327	0.91	0.395965
Atlantic	Bowman et al. 2015	Deep Sea Research II	DOI: 10.1016/j.dsr2.2014.07.555	YES	GEOTRACES GA03 KN204-1 (US)	16	2011	26.14	-44.83	3333	0.95	0.204682
Atlantic	Bowman et al. 2015	Deep Sea Research II	DOI: 10.1016/j.dsr2.2014.07.556	YES	GEOTRACES GA03 KN204-1 (US)	16	2011	26.14	-44.83	3393	12.8	0.221491
Atlantic	Bowman et al. 2015	Deep Sea Research II	DOI: 10.1016/j.dsr2.2014.07.557	YES	GEOTRACES GA03 KN204-1 (US)	16	2011	26.14	-44.83	3589	1.86
Atlantic	Bowman et al. 2015	Deep Sea Research II	DOI: 10.1016/j.dsr2.2014.07.558	YES	GEOTRACES GA03 KN204-1 (US)	17	2011	25.14	-42.52	2	0.32	0.0561411
Atlantic	Bowman et al. 2015	Deep Sea Research II	DOI: 10.1016/j.dsr2.2014.07.559	YES	GEOTRACES GA03 KN204-1 (US)	17	2011	25.14	-42.52	50		0.112385
Atlantic	Bowman et al. 2015	Deep Sea Research II	DOI: 10.1016/j.dsr2.2014.07.560	YES	GEOTRACES GA03 KN204-1 (US)	17	2011	25.14	-42.52	100	0.49	0.158281
Atlantic	Bowman et al. 2015	Deep Sea Research II	DOI: 10.1016/j.dsr2.2014.07.561	YES	GEOTRACES GA03 KN204-1 (US)	17	2011	25.14	-42.52	135		0.179912
Atlantic	Bowman et al. 2015	Deep Sea Research II	DOI: 10.1016/j.dsr2.2014.07.562	YES	GEOTRACES GA03 KN204-1 (US)	17	2011	25.14	-42.52	185	0.6	0.199411
Atlantic	Bowman et al. 2015	Deep Sea Research II	DOI: 10.1016/j.dsr2.2014.07.563	YES	GEOTRACES GA03 KN204-1 (US)	17	2011	25.14	-42.52	235	0.59
Atlantic	Bowman et al. 2015	Deep Sea Research II	DOI: 10.1016/j.dsr2.2014.07.564	YES	GEOTRACES GA03 KN204-1 (US)	17	2011	25.14	-42.52	285	0.63	0.0860012
Atlantic	Bowman et al. 2015	Deep Sea Research II	DOI: 10.1016/j.dsr2.2014.07.565	YES	GEOTRACES GA03 KN204-1 (US)	17	2011	25.14	-42.52	350	0.61
Atlantic	Bowman et al. 2015	Deep Sea Research II	DOI: 10.1016/j.dsr2.2014.07.566	YES	GEOTRACES GA03 KN204-1 (US)	17	2011	25.14	-42.52	420	0.63	0.138317
Atlantic	Bowman et al. 2015	Deep Sea Research II	DOI: 10.1016/j.dsr2.2014.07.567	YES	GEOTRACES GA03 KN204-1 (US)	17	2011	25.14	-42.52	530	0.75
Atlantic	Bowman et al. 2015	Deep Sea Research II	DOI: 10.1016/j.dsr2.2014.07.568	YES	GEOTRACES GA03 KN204-1 (US)	17	2011	25.14	-42.52	665	0.79	0.110047
Atlantic	Bowman et al. 2015	Deep Sea Research II	DOI: 10.1016/j.dsr2.2014.07.569	YES	GEOTRACES GA03 KN204-1 (US)	17	2011	25.14	-42.52	800	0.93	0.340617
Atlantic	Bowman et al. 2015	Deep Sea Research II	DOI: 10.1016/j.dsr2.2014.07.570	YES	GEOTRACES GA03 KN204-1 (US)	17	2011	25.14	-42.52	1000	0.93
Atlantic	Bowman et al. 2015	Deep Sea Research II	DOI: 10.1016/j.dsr2.2014.07.571	YES	GEOTRACES GA03 KN204-1 (US)	18	2011	24.15	-40.217	2	0.34	0.156736
Atlantic	Bowman et al. 2015	Deep Sea Research II	DOI: 10.1016/j.dsr2.2014.07.572	YES	GEOTRACES GA03 KN204-1 (US)	18	2011	24.15	-40.217	40	0.71	0.0659115
Atlantic	Bowman et al. 2015	Deep Sea Research II	DOI: 10.1016/j.dsr2.2014.07.573	YES	GEOTRACES GA03 KN204-1 (US)	18	2011	24.15	-40.217	65	0.78	0.136115
Atlantic	Bowman et al. 2015	Deep Sea Research II	DOI: 10.1016/j.dsr2.2014.07.574	YES	GEOTRACES GA03 KN204-1 (US)	18	2011	24.15	-40.217	75	0.9	0.217718
Atlantic	Bowman et al. 2015	Deep Sea Research II	DOI: 10.1016/j.dsr2.2014.07.575	YES	GEOTRACES GA03 KN204-1 (US)	18	2011	24.15	-40.217	110	0.77	0.137616
Atlantic	Bowman et al. 2015	Deep Sea Research II	DOI: 10.1016/j.dsr2.2014.07.576	YES	GEOTRACES GA03 KN204-1 (US)	18	2011	24.15	-40.217	135	0.66	0.125435
Atlantic	Bowman et al. 2015	Deep Sea Research II	DOI: 10.1016/j.dsr2.2014.07.577	YES	GEOTRACES GA03 KN204-1 (US)	18	2011	24.15	-40.217	185	0.83	0.574424
Atlantic	Bowman et al. 2015	Deep Sea Research II	DOI: 10.1016/j.dsr2.2014.07.578	YES	GEOTRACES GA03 KN204-1 (US)	18	2011	24.15	-40.217	235	1.13
Atlantic	Bowman et al. 2015	Deep Sea Research II	DOI: 10.1016/j.dsr2.2014.07.579	YES	GEOTRACES GA03 KN204-1 (US)	18	2011	24.15	-40.217	286	1.16
Atlantic	Bowman et al. 2015	Deep Sea Research II	DOI: 10.1016/j.dsr2.2014.07.580	YES	GEOTRACES GA03 KN204-1 (US)	18	2011	24.15	-40.217	350	1.15	0.317373
Atlantic	Bowman et al. 2015	Deep Sea Research II	DOI: 10.1016/j.dsr2.2014.07.581	YES	GEOTRACES GA03 KN204-1 (US)	18	2011	24.15	-40.217	421	1.2	0.30368
Atlantic	Bowman et al. 2015	Deep Sea Research II	DOI: 10.1016/j.dsr2.2014.07.582	YES	GEOTRACES GA03 KN204-1 (US)	18	2011	24.15	-40.217	510	1.42	0.419911
Atlantic	Bowman et al. 2015	Deep Sea Research II	DOI: 10.1016/j.dsr2.2014.07.583	YES	GEOTRACES GA03 KN204-1 (US)	18	2011	24.15	-40.217	600	1.3	0.188643
Atlantic	Bowman et al. 2015	Deep Sea Research II	DOI: 10.1016/j.dsr2.2014.07.584	YES	GEOTRACES GA03 KN204-1 (US)	18	2011	24.15	-40.217	775	1.14	0.336075
Atlantic	Bowman et al. 2015	Deep Sea Research II	DOI: 10.1016/j.dsr2.2014.07.585	YES	GEOTRACES GA03 KN204-1 (US)	18	2011	24.15	-40.217	966	0.92	0.236236
Atlantic	Bowman et al. 2015	Deep Sea Research II	DOI: 10.1016/j.dsr2.2014.07.586	YES	GEOTRACES GA03 KN204-1 (US)	18	2011	24.15	-40.217	1149	0.94	0.294729
Atlantic	Bowman et al. 2015	Deep Sea Research II	DOI: 10.1016/j.dsr2.2014.07.587	YES	GEOTRACES GA03 KN204-1 (US)	18	2011	24.15	-40.217	1325	0.98	0.215219
Atlantic	Bowman et al. 2015	Deep Sea Research II	DOI: 10.1016/j.dsr2.2014.07.588	YES	GEOTRACES GA03 KN204-1 (US)	18	2011	24.15	-40.217	1499	0.97
Atlantic	Bowman et al. 2015	Deep Sea Research II	DOI: 10.1016/j.dsr2.2014.07.589	YES	GEOTRACES GA03 KN204-1 (US)	18	2011	24.15	-40.217	1800	0.96	0.231388
Atlantic	Bowman et al. 2015	Deep Sea Research II	DOI: 10.1016/j.dsr2.2014.07.590	YES	GEOTRACES GA03 KN204-1 (US)	18	2011	24.15	-40.217	2100	1	0.15862
Atlantic	Bowman et al. 2015	Deep Sea Research II	DOI: 10.1016/j.dsr2.2014.07.591	YES	GEOTRACES GA03 KN204-1 (US)	18	2011	24.15	-40.217	2550	1.07
Atlantic	Bowman et al. 2015	Deep Sea Research II	DOI: 10.1016/j.dsr2.2014.07.592	YES	GEOTRACES GA03 KN204-1 (US)	18	2011	24.15	-40.217	3000	0.85	0.370683
Atlantic	Bowman et al. 2015	Deep Sea Research II	DOI: 10.1016/j.dsr2.2014.07.593	YES	GEOTRACES GA03 KN204-1 (US)	18	2011	24.15	-40.217	3400	0.86	0.459035
Atlantic	Bowman et al. 2015	Deep Sea Research II	DOI: 10.1016/j.dsr2.2014.07.594	YES	GEOTRACES GA03 KN204-1 (US)	18	2011	24.15	-40.217	3800	0.82	0.249934
Atlantic	Bowman et al. 2015	Deep Sea Research II	DOI: 10.1016/j.dsr2.2014.07.595	YES	GEOTRACES GA03 KN204-1 (US)	18	2011	24.15	-40.217	4300	1.01
Atlantic	Bowman et al. 2015	Deep Sea Research II	DOI: 10.1016/j.dsr2.2014.07.596	YES	GEOTRACES GA03 KN204-1 (US)	19	2011	23.24	-38.04	2	0.4	0.0557374
Atlantic	Bowman et al. 2015	Deep Sea Research II	DOI: 10.1016/j.dsr2.2014.07.597	YES	GEOTRACES GA03 KN204-1 (US)	19	2011	23.24	-38.04	60.9	0.64
Atlantic	Bowman et al. 2015	Deep Sea Research II	DOI: 10.1016/j.dsr2.2014.07.598	YES	GEOTRACES GA03 KN204-1 (US)	19	2011	23.24	-38.04	106.4	0.46
Atlantic	Bowman et al. 2015	Deep Sea Research II	DOI: 10.1016/j.dsr2.2014.07.599	YES	GEOTRACES GA03 KN204-1 (US)	19	2011	23.24	-38.04	136.4	0.44	0.0647161
Atlantic	Bowman et al. 2015	Deep Sea Research II	DOI: 10.1016/j.dsr2.2014.07.600	YES	GEOTRACES GA03 KN204-1 (US)	19	2011	23.24	-38.04	186.7	0.57	0.105981
Atlantic	Bowman et al. 2015	Deep Sea Research II	DOI: 10.1016/j.dsr2.2014.07.601	YES	GEOTRACES GA03 KN204-1 (US)	19	2011	23.24	-38.04	237.9	0.65	0.0152993
Atlantic	Bowman et al. 2015	Deep Sea Research II	DOI: 10.1016/j.dsr2.2014.07.602	YES	GEOTRACES GA03 KN204-1 (US)	19	2011	23.24	-38.04	284.9	0.68	0.146616
Atlantic	Bowman et al. 2015	Deep Sea Research II	DOI: 10.1016/j.dsr2.2014.07.603	YES	GEOTRACES GA03 KN204-1 (US)	19	2011	23.24	-38.04	352.7	0.74	0.42104
Atlantic	Bowman et al. 2015	Deep Sea Research II	DOI: 10.1016/j.dsr2.2014.07.604	YES	GEOTRACES GA03 KN204-1 (US)	19	2011	23.24	-38.04	421.5	0.77	0.369907
Atlantic	Bowman et al. 2015	Deep Sea Research II	DOI: 10.1016/j.dsr2.2014.07.605	YES	GEOTRACES GA03 KN204-1 (US)	19	2011	23.24	-38.04	531	0.97	0.273668
Atlantic	Bowman et al. 2015	Deep Sea Research II	DOI: 10.1016/j.dsr2.2014.07.606	YES	GEOTRACES GA03 KN204-1 (US)	19	2011	23.24	-38.04	600.6	1.1
Atlantic	Bowman et al. 2015	Deep Sea Research II	DOI: 10.1016/j.dsr2.2014.07.607	YES	GEOTRACES GA03 KN204-1 (US)	19	2011	23.24	-38.04	851.6	1.04	0.230817
Atlantic	Bowman et al. 2015	Deep Sea Research II	DOI: 10.1016/j.dsr2.2014.07.608	YES	GEOTRACES GA03 KN204-1 (US)	19	2011	23.24	-38.04	1002.2	0.96
Atlantic	Bowman et al. 2015	Deep Sea Research II	DOI: 10.1016/j.dsr2.2014.07.609	YES	GEOTRACES GA03 KN204-1 (US)	20	2011	22.33	-35.87	40	0.49
Atlantic	Bowman et al. 2015	Deep Sea Research II	DOI: 10.1016/j.dsr2.2014.07.610	YES	GEOTRACES GA03 KN204-1 (US)	20	2011	22.33	-35.87	65	0.49
Atlantic	Bowman et al. 2015	Deep Sea Research II	DOI: 10.1016/j.dsr2.2014.07.611	YES	GEOTRACES GA03 KN204-1 (US)	20	2011	22.33	-35.87	75	0.37
Atlantic	Bowman et al. 2015	Deep Sea Research II	DOI: 10.1016/j.dsr2.2014.07.612	YES	GEOTRACES GA03 KN204-1 (US)	20	2011	22.33	-35.87	105	0.36
Atlantic	Bowman et al. 2015	Deep Sea Research II	DOI: 10.1016/j.dsr2.2014.07.613	YES	GEOTRACES GA03 KN204-1 (US)	20	2011	22.33	-35.87	135	0.54
Atlantic	Bowman et al. 2015	Deep Sea Research II	DOI: 10.1016/j.dsr2.2014.07.614	YES	GEOTRACES GA03 KN204-1 (US)	20	2011	22.33	-35.87	185	0.62	0.044058
Atlantic	Bowman et al. 2015	Deep Sea Research II	DOI: 10.1016/j.dsr2.2014.07.615	YES	GEOTRACES GA03 KN204-1 (US)	20	2011	22.33	-35.87	235	0.74	0.0856772
Atlantic	Bowman et al. 2015	Deep Sea Research II	DOI: 10.1016/j.dsr2.2014.07.616	YES	GEOTRACES GA03 KN204-1 (US)	20	2011	22.33	-35.87	300	0.71
Atlantic	Bowman et al. 2015	Deep Sea Research II	DOI: 10.1016/j.dsr2.2014.07.617	YES	GEOTRACES GA03 KN204-1 (US)	20	2011	22.33	-35.87	375	0.85
Atlantic	Bowman et al. 2015	Deep Sea Research II	DOI: 10.1016/j.dsr2.2014.07.618	YES	GEOTRACES GA03 KN204-1 (US)	20	2011	22.33	-35.87	440	0.84
Atlantic	Bowman et al. 2015	Deep Sea Research II	DOI: 10.1016/j.dsr2.2014.07.619	YES	GEOTRACES GA03 KN204-1 (US)	20	2011	22.33	-35.87	500	1	0.0714957
Atlantic	Bowman et al. 2015	Deep Sea Research II	DOI: 10.1016/j.dsr2.2014.07.620	YES	GEOTRACES GA03 KN204-1 (US)	20	2011	22.33	-35.87	600	1.12	0.369666
Atlantic	Bowman et al. 2015	Deep Sea Research II	DOI: 10.1016/j.dsr2.2014.07.621	YES	GEOTRACES GA03 KN204-1 (US)	20	2011	22.33	-35.87	700	1.11	0.22267
Atlantic	Bowman et al. 2015	Deep Sea Research II	DOI: 10.1016/j.dsr2.2014.07.622	YES	GEOTRACES GA03 KN204-1 (US)	20	2011	22.33	-35.87	810	1.12	0.229709
Atlantic	Bowman et al. 2015	Deep Sea Research II	DOI: 10.1016/j.dsr2.2014.07.623	YES	GEOTRACES GA03 KN204-1 (US)	20	2011	22.33	-35.87	926	1	0.206607
Atlantic	Bowman et al. 2015	Deep Sea Research II	DOI: 10.1016/j.dsr2.2014.07.624	YES	GEOTRACES GA03 KN204-1 (US)	20	2011	22.33	-35.87	1061	0.87	0.0632137
Atlantic	Bowman et al. 2015	Deep Sea Research II	DOI: 10.1016/j.dsr2.2014.07.625	YES	GEOTRACES GA03 KN204-1 (US)	20	2011	22.33	-35.87	1200	0.89	0.458319
Atlantic	Bowman et al. 2015	Deep Sea Research II	DOI: 10.1016/j.dsr2.2014.07.626	YES	GEOTRACES GA03 KN204-1 (US)	20	2011	22.33	-35.87	1350	0.82	0.268458
Atlantic	Bowman et al. 2015	Deep Sea Research II	DOI: 10.1016/j.dsr2.2014.07.627	YES	GEOTRACES GA03 KN204-1 (US)	20	2011	22.33	-35.87	1500
Atlantic	Bowman et al. 2015	Deep Sea Research II	DOI: 10.1016/j.dsr2.2014.07.628	YES	GEOTRACES GA03 KN204-1 (US)	20	2011	22.33	-35.87	1625	0.84	0.0680291
Atlantic	Bowman et al. 2015	Deep Sea Research II	DOI: 10.1016/j.dsr2.2014.07.629	YES	GEOTRACES GA03 KN204-1 (US)	20	2011	22.33	-35.87	1750	0.84
Atlantic	Bowman et al. 2015	Deep Sea Research II	DOI: 10.1016/j.dsr2.2014.07.630	YES	GEOTRACES GA03 KN204-1 (US)	20	2011	22.33	-35.87	1900	0.85
Atlantic	Bowman et al. 2015	Deep Sea Research II	DOI: 10.1016/j.dsr2.2014.07.631	YES	GEOTRACES GA03 KN204-1 (US)	20	2011	22.33	-35.87	2100	0.92
Atlantic	Bowman et al. 2015	Deep Sea Research II	DOI: 10.1016/j.dsr2.2014.07.632	YES	GEOTRACES GA03 KN204-1 (US)	20	2011	22.33	-35.87	2301	1.01	0.10598
Atlantic	Bowman et al. 2015	Deep Sea Research II	DOI: 10.1016/j.dsr2.2014.07.633	YES	GEOTRACES GA03 KN204-1 (US)	20	2011	22.33	-35.87	2500	1.22	0.186609
Atlantic	Bowman et al. 2015	Deep Sea Research II	DOI: 10.1016/j.dsr2.2014.07.634	YES	GEOTRACES GA03 KN204-1 (US)	20	2011	22.33	-35.87	2700	1.17
Atlantic	Bowman et al. 2015	Deep Sea Research II	DOI: 10.1016/j.dsr2.2014.07.635	YES	GEOTRACES GA03 KN204-1 (US)	20	2011	22.33	-35.87	3100	1.27
Atlantic	Bowman et al. 2015	Deep Sea Research II	DOI: 10.1016/j.dsr2.2014.07.636	YES	GEOTRACES GA03 KN204-1 (US)	20	2011	22.33	-35.87	3500	1.23
Atlantic	Bowman et al. 2015	Deep Sea Research II	DOI: 10.1016/j.dsr2.2014.07.637	YES	GEOTRACES GA03 KN204-1 (US)	20	2011	22.33	-35.87	3900	1.28
Atlantic	Bowman et al. 2015	Deep Sea Research II	DOI: 10.1016/j.dsr2.2014.07.638	YES	GEOTRACES GA03 KN204-1 (US)	20	2011	22.33	-35.87	4300	1.37
Atlantic	Bowman et al. 2015	Deep Sea Research II	DOI: 10.1016/j.dsr2.2014.07.639	YES	GEOTRACES GA03 KN204-1 (US)	20	2011	22.33	-35.87	4701	1.2	0.355877
Atlantic	Bowman et al. 2015	Deep Sea Research II	DOI: 10.1016/j.dsr2.2014.07.640	YES	GEOTRACES GA03 KN204-1 (US)	20	2011	22.33	-35.87	4900	1.31
Atlantic	Bowman et al. 2015	Deep Sea Research II	DOI: 10.1016/j.dsr2.2014.07.641	YES	GEOTRACES GA03 KN204-1 (US)	20	2011	22.33	-35.87	5100	1.31	0.346746
Atlantic	Bowman et al. 2015	Deep Sea Research II	DOI: 10.1016/j.dsr2.2014.07.642	YES	GEOTRACES GA03 KN204-1 (US)	20	2011	22.33	-35.87	5250	1.53
Atlantic	Bowman et al. 2015	Deep Sea Research II	DOI: 10.1016/j.dsr2.2014.07.643	YES	GEOTRACES GA03 KN204-1 (US)	20	2011	22.33	-35.87	5391	1.37
Atlantic	Bowman et al. 2015	Deep Sea Research II	DOI: 10.1016/j.dsr2.2014.07.644	YES	GEOTRACES GA03 KN204-1 (US)	20	2011	22.33	-35.87	5800	1.37	0.265547
Atlantic	Bowman et al. 2015	Deep Sea Research II	DOI: 10.1016/j.dsr2.2014.07.645	YES	GEOTRACES GA03 KN204-1 (US)	20	2011	22.33	-35.87	2	0.24
Atlantic	Bowman et al. 2015	Deep Sea Research II	DOI: 10.1016/j.dsr2.2014.07.646	YES	GEOTRACES GA03 KN204-1 (US)	21	2011	20.88	-32.62	40	0.46
Atlantic	Bowman et al. 2015	Deep Sea Research II	DOI: 10.1016/j.dsr2.2014.07.647	YES	GEOTRACES GA03 KN204-1 (US)	21	2011	20.88	-32.62	60	0.55
Atlantic	Bowman et al. 2015	Deep Sea Research II	DOI: 10.1016/j.dsr2.2014.07.648	YES	GEOTRACES GA03 KN204-1 (US)	21	2011	20.88	-32.62	100	0.5	0.0967519
Atlantic	Bowman et al. 2015	Deep Sea Research II	DOI: 10.1016/j.dsr2.2014.07.649	YES	GEOTRACES GA03 KN204-1 (US)	21	2011	20.88	-32.62	180	0.92
Atlantic	Bowman et al. 2015	Deep Sea Research II	DOI: 10.1016/j.dsr2.2014.07.650	YES	GEOTRACES GA03 KN204-1 (US)	21	2011	20.88	-32.62	205	1.08
Atlantic	Bowman et al. 2015	Deep Sea Research II	DOI: 10.1016/j.dsr2.2014.07.651	YES	GEOTRACES GA03 KN204-1 (US)	21	2011	20.88	-32.62	286	0.92	0.412875
Atlantic	Bowman et al. 2015	Deep Sea Research II	DOI: 10.1016/j.dsr2.2014.07.652	YES	GEOTRACES GA03 KN204-1 (US)	21	2011	20.88	-32.62	335	1.01
Atlantic	Bowman et al. 2015	Deep Sea Research II	DOI: 10.1016/j.dsr2.2014.07.653	YES	GEOTRACES GA03 KN204-1 (US)	21	2011	20.88	-32.62	400	1.13	0.26243
Atlantic	Bowman et al. 2015	Deep Sea Research II	DOI: 10.1016/j.dsr2.2014.07.654	YES	GEOTRACES GA03 KN204-1 (US)	21	2011	20.88	-32.62	500	1.35
Atlantic	Bowman et al. 2015	Deep Sea Research II	DOI: 10.1016/j.dsr2.2014.07.655	YES	GEOTRACES GA03 KN204-1 (US)	21	2011	20.88	-32.62	625	1.48
Atlantic	Bowman et al. 2015	Deep Sea Research II	DOI: 10.1016/j.dsr2.2014.07.656	YES	GEOTRACES GA03 KN204-1 (US)	21	2011	20.88	-32.62	800	1.45	0.255228
Atlantic	Bowman et al. 2015	Deep Sea Research II	DOI: 10.1016/j.dsr2.2014.07.657	YES	GEOTRACES GA03 KN204-1 (US)	21	2011	20.88	-32.62	1000	1.89
Atlantic	Bowman et al. 2015	Deep Sea Research II	DOI: 10.1016/j.dsr2.2014.07.658	YES	GEOTRACES GA03 KN204-1 (US)	22	2011	19.43	-29.38	2	0.28
Atlantic	Bowman et al. 2015	Deep Sea Research II	DOI: 10.1016/j.dsr2.2014.07.659	YES	GEOTRACES GA03 KN204-1 (US)	22	2011	19.43	-29.38	51	0.42	0.115287
Atlantic	Bowman et al. 2015	Deep Sea Research II	DOI: 10.1016/j.dsr2.2014.07.660	YES	GEOTRACES GA03 KN204-1 (US)	22	2011	19.43	-29.38	80	0.51	0.107876
Atlantic	Bowman et al. 2015	Deep Sea Research II	DOI: 10.1016/j.dsr2.2014.07.661	YES	GEOTRACES GA03 KN204-1 (US)	22	2011	19.43	-29.38	95	0.35
Atlantic	Bowman et al. 2015	Deep Sea Research II	DOI: 10.1016/j.dsr2.2014.07.662	YES	GEOTRACES GA03 KN204-1 (US)	22	2011	19.43	-29.38	125	0.53
Atlantic	Bowman et al. 2015	Deep Sea Research II	DOI: 10.1016/j.dsr2.2014.07.663	YES	GEOTRACES GA03 KN204-1 (US)	22	2011	19.43	-29.38	186	0.73	0.0600577
Atlantic	Bowman et al. 2015	Deep Sea Research II	DOI: 10.1016/j.dsr2.2014.07.664	YES	GEOTRACES GA03 KN204-1 (US)	22	2011	19.43	-29.38	236	0.86	0.0570438
Atlantic	Bowman et al. 2015	Deep Sea Research II	DOI: 10.1016/j.dsr2.2014.07.665	YES	GEOTRACES GA03 KN204-1 (US)	22	2011	19.43	-29.38	285	0.89
Atlantic	Bowman et al. 2015	Deep Sea Research II	DOI: 10.1016/j.dsr2.2014.07.666	YES	GEOTRACES GA03 KN204-1 (US)	22	2011	19.43	-29.38	390	0.97
Atlantic	Bowman et al. 2015	Deep Sea Research II	DOI: 10.1016/j.dsr2.2014.07.667	YES	GEOTRACES GA03 KN204-1 (US)	22	2011	19.43	-29.38	553	1.19	0.136116
Atlantic	Bowman et al. 2015	Deep Sea Research II	DOI: 10.1016/j.dsr2.2014.07.668	YES	GEOTRACES GA03 KN204-1 (US)	22	2011	19.43	-29.38	665	1.26
Atlantic	Bowman et al. 2015	Deep Sea Research II	DOI: 10.1016/j.dsr2.2014.07.669	YES	GEOTRACES GA03 KN204-1 (US)	22	2011	19.43	-29.38	900	1.04
Atlantic	Bowman et al. 2015	Deep Sea Research II	DOI: 10.1016/j.dsr2.2014.07.670	YES	GEOTRACES GA03 KN204-1 (US)	22	2011	19.43	-29.38	1200	1.09
Atlantic	Bowman et al. 2015	Deep Sea Research II	DOI: 10.1016/j.dsr2.2014.07.671	YES	GEOTRACES GA03 KN204-1 (US)	22	2011	19.43	-29.38	1500	0.89	0.174214
Atlantic	Bowman et al. 2015	Deep Sea Research II	DOI: 10.1016/j.dsr2.2014.07.672	YES	GEOTRACES GA03 KN204-1 (US)	22	2011	19.43	-29.38	1800	0.91	0.102821
Atlantic	Bowman et al. 2015	Deep Sea Research II	DOI: 10.1016/j.dsr2.2014.07.673	YES	GEOTRACES GA03 KN204-1 (US)	22	2011	19.43	-29.38	2100	0.87
Atlantic	Bowman et al. 2015	Deep Sea Research II	DOI: 10.1016/j.dsr2.2014.07.674	YES	GEOTRACES GA03 KN204-1 (US)	22	2011	19.43	-29.38	2400	1
Atlantic	Bowman et al. 2015	Deep Sea Research II	DOI: 10.1016/j.dsr2.2014.07.675	YES	GEOTRACES GA03 KN204-1 (US)	22	2011	19.43	-29.38	2700	1.32
Atlantic	Bowman et al. 2015	Deep Sea Research II	DOI: 10.1016/j.dsr2.2014.07.676	YES	GEOTRACES GA03 KN204-1 (US)	22	2011	19.43	-29.38	3000	1.15	0.164393
Atlantic	Bowman et al. 2015	Deep Sea Research II	DOI: 10.1016/j.dsr2.2014.07.677	YES	GEOTRACES GA03 KN204-1 (US)	22	2011	19.43	-29.38	3300	1.39
Atlantic	Bowman et al. 2015	Deep Sea Research II	DOI: 10.1016/j.dsr2.2014.07.678	YES	GEOTRACES GA03 KN204-1 (US)	22	2011	19.43	-29.38	3600	1.47	0.350786
Atlantic	Bowman et al. 2015	Deep Sea Research II	DOI: 10.1016/j.dsr2.2014.07.679	YES	GEOTRACES GA03 KN204-1 (US)	22	2011	19.43	-29.38	3900	1.5
Atlantic	Bowman et al. 2015	Deep Sea Research II	DOI: 10.1016/j.dsr2.2014.07.680	YES	GEOTRACES GA03 KN204-1 (US)	22	2011	19.43	-29.38	4200	1.57
Atlantic	Bowman et al. 2015	Deep Sea Research II	DOI: 10.1016/j.dsr2.2014.07.681	YES	GEOTRACES GA03 KN204-1 (US)	22	2011	19.43	-29.38	4600	1.6
Atlantic	Bowman et al. 2015	Deep Sea Research II	DOI: 10.1016/j.dsr2.2014.07.682	YES	GEOTRACES GA03 KN204-1 (US)	22	2011	19.43	-29.38	4985	1.54	0.349737
Atlantic	Bowman et al. 2015	Deep Sea Research II	DOI: 10.1016/j.dsr2.2014.07.683	YES	GEOTRACES GA03 KN204-1 (US)	23	2011	18.39	-26.77	2	0.24
Atlantic	Bowman et al. 2015	Deep Sea Research II	DOI: 10.1016/j.dsr2.2014.07.684	YES	GEOTRACES GA03 KN204-1 (US)	23	2011	18.39	-26.77	50	1.15	0.0317051
Atlantic	Bowman et al. 2015	Deep Sea Research II	DOI: 10.1016/j.dsr2.2014.07.685	YES	GEOTRACES GA03 KN204-1 (US)	23	2011	18.39	-26.77	78	0.69
Atlantic	Bowman et al. 2015	Deep Sea Research II	DOI: 10.1016/j.dsr2.2014.07.686	YES	GEOTRACES GA03 KN204-1 (US)	23	2011	18.39	-26.77	128	0.84	0.227174
Atlantic	Bowman et al. 2015	Deep Sea Research II	DOI: 10.1016/j.dsr2.2014.07.687	YES	GEOTRACES GA03 KN204-1 (US)	23	2011	18.39	-26.77	185	0.93	0.484411
Atlantic	Bowman et al. 2015	Deep Sea Research II	DOI: 10.1016/j.dsr2.2014.07.688	YES	GEOTRACES GA03 KN204-1 (US)	23	2011	18.39	-26.77	235	0.99
Atlantic	Bowman et al. 2015	Deep Sea Research II	DOI: 10.1016/j.dsr2.2014.07.689	YES	GEOTRACES GA03 KN204-1 (US)	23	2011	18.39	-26.77	282	1.08	0.282395
Atlantic	Bowman et al. 2015	Deep Sea Research II	DOI: 10.1016/j.dsr2.2014.07.690	YES	GEOTRACES GA03 KN204-1 (US)	23	2011	18.39	-26.77	350	1.26	0.287
Atlantic	Bowman et al. 2015	Deep Sea Research II	DOI: 10.1016/j.dsr2.2014.07.691	YES	GEOTRACES GA03 KN204-1 (US)	23	2011	18.39	-26.77	401	1.37	0.258149
Atlantic	Bowman et al. 2015	Deep Sea Research II	DOI: 10.1016/j.dsr2.2014.07.692	YES	GEOTRACES GA03 KN204-1 (US)	23	2011	18.39	-26.77	474	1.55
Atlantic	Bowman et al. 2015	Deep Sea Research II	DOI: 10.1016/j.dsr2.2014.07.693	YES	GEOTRACES GA03 KN204-1 (US)	23	2011	18.39	-26.77	550	1.61	0.154281
Atlantic	Bowman et al. 2015	Deep Sea Research II	DOI: 10.1016/j.dsr2.2014.07.694	YES	GEOTRACES GA03 KN204-1 (US)	23	2011	18.39	-26.77	750	1.5
Atlantic	Bowman et al. 2015	Deep Sea Research II	DOI: 10.1016/j.dsr2.2014.07.695	YES	GEOTRACES GA03 KN204-1 (US)	23	2011	18.39	-26.77	1000	1.3	0.120108
Atlantic	Bowman et al. 2015	Deep Sea Research II	DOI: 10.1016/j.dsr2.2014.07.696	YES	GEOTRACES GA03 KN204-1 (US)	24	2011	17.4	-24.5	2	0.3
Atlantic	Bowman et al. 2015	Deep Sea Research II	DOI: 10.1016/j.dsr2.2014.07.697	YES	GEOTRACES GA03 KN204-1 (US)	24	2011	17.4	-24.5	40	0.47	0.190965
Atlantic	Bowman et al. 2015	Deep Sea Research II	DOI: 10.1016/j.dsr2.2014.07.698	YES	GEOTRACES GA03 KN204-1 (US)	24	2011	17.4	-24.5	50	0.52	0.221293
Atlantic	Bowman et al. 2015	Deep Sea Research II	DOI: 10.1016/j.dsr2.2014.07.699	YES	GEOTRACES GA03 KN204-1 (US)	24	2011	17.4	-24.5	71	0.58
Atlantic	Bowman et al. 2015	Deep Sea Research II	DOI: 10.1016/j.dsr2.2014.07.700	YES	GEOTRACES GA03 KN204-1 (US)	24	2011	17.4	-24.5	90	0.62	0.0826348
Atlantic	Bowman et al. 2015	Deep Sea Research II	DOI: 10.1016/j.dsr2.2014.07.701	YES	GEOTRACES GA03 KN204-1 (US)	24	2011	17.4	-24.5	135	0.83	0.0435414
Atlantic	Bowman et al. 2015	Deep Sea Research II	DOI: 10.1016/j.dsr2.2014.07.702	YES	GEOTRACES GA03 KN204-1 (US)	24	2011	17.4	-24.5	185	0.99
Atlantic	Bowman et al. 2015	Deep Sea Research II	DOI: 10.1016/j.dsr2.2014.07.703	YES	GEOTRACES GA03 KN204-1 (US)	24	2011	17.4	-24.5	235	1.24	0.426571
Atlantic	Bowman et al. 2015	Deep Sea Research II	DOI: 10.1016/j.dsr2.2014.07.704	YES	GEOTRACES GA03 KN204-1 (US)	24	2011	17.4	-24.5	286	1.29	0.111972
Atlantic	Bowman et al. 2015	Deep Sea Research II	DOI: 10.1016/j.dsr2.2014.07.705	YES	GEOTRACES GA03 KN204-1 (US)	24	2011	17.4	-24.5	451	1.38	0.300869
Atlantic	Bowman et al. 2015	Deep Sea Research II	DOI: 10.1016/j.dsr2.2014.07.706	YES	GEOTRACES GA03 KN204-1 (US)	24	2011	17.4	-24.5	801	1.29	0.259348
Atlantic	Bowman et al. 2015	Deep Sea Research II	DOI: 10.1016/j.dsr2.2014.07.707	YES	GEOTRACES GA03 KN204-1 (US)	24	2011	17.4	-24.5	1099	1.01	0.28004
Atlantic	Bowman et al. 2015	Deep Sea Research II	DOI: 10.1016/j.dsr2.2014.07.708	YES	GEOTRACES GA03 KN204-1 (US)	24	2011	17.4	-24.5	1499	0.85	0.130095
Atlantic	Bratkic et al. 2016	Global Biogeochemical cycles	DOI: 10.1002/2015GB005275	YES	GEOTRACES GA10 JC068 (UK)	1	2011	-34.6124	17.0538	397
Atlantic	Bratkic et al. 2016	Global Biogeochemical cycles	DOI: 10.1002/2015GB005275	YES	GEOTRACES GA10 JC068 (UK)	1	2011	-34.6124	17.0538	397
Atlantic	Bratkic et al. 2016	Global Biogeochemical cycles	DOI: 10.1002/2015GB005275	YES	GEOTRACES GA10 JC068 (UK)	1	2011	-34.6124	17.0538	297
Atlantic	Bratkic et al. 2016	Global Biogeochemical cycles	DOI: 10.1002/2015GB005275	YES	GEOTRACES GA10 JC068 (UK)	1	2011	-34.6124	17.0538	298
Atlantic	Bratkic et al. 2016	Global Biogeochemical cycles	DOI: 10.1002/2015GB005275	YES	GEOTRACES GA10 JC068 (UK)	1	2011	-34.6124	17.0538	198
Atlantic	Bratkic et al. 2016	Global Biogeochemical cycles	DOI: 10.1002/2015GB005275	YES	GEOTRACES GA10 JC068 (UK)	1	2011	-34.6124	17.0538	199
Atlantic	Bratkic et al. 2016	Global Biogeochemical cycles	DOI: 10.1002/2015GB005275	YES	GEOTRACES GA10 JC068 (UK)	1	2011	-34.6124	17.0538	99
Atlantic	Bratkic et al. 2016	Global Biogeochemical cycles	DOI: 10.1002/2015GB005275	YES	GEOTRACES GA10 JC068 (UK)	1	2011	-34.6124	17.0538	98
Atlantic	Bratkic et al. 2016	Global Biogeochemical cycles	DOI: 10.1002/2015GB005275	YES	GEOTRACES GA10 JC068 (UK)	1	2011	-34.6124	17.0538	79
Atlantic	Bratkic et al. 2016	Global Biogeochemical cycles	DOI: 10.1002/2015GB005275	YES	GEOTRACES GA10 JC068 (UK)	1	2011	-34.6124	17.0538	79
Atlantic	Bratkic et al. 2016	Global Biogeochemical cycles	DOI: 10.1002/2015GB005275	YES	GEOTRACES GA10 JC068 (UK)	1	2011	-34.6124	17.0538	59
Atlantic	Bratkic et al. 2016	Global Biogeochemical cycles	DOI: 10.1002/2015GB005275	YES	GEOTRACES GA10 JC068 (UK)	1	2011	-34.6124	17.0538	59
Atlantic	Bratkic et al. 2016	Global Biogeochemical cycles	DOI: 10.1002/2015GB005275	YES	GEOTRACES GA10 JC068 (UK)	1	2011	-34.6124	17.0538	49
Atlantic	Bratkic et al. 2016	Global Biogeochemical cycles	DOI: 10.1002/2015GB005275	YES	GEOTRACES GA10 JC068 (UK)	1	2011	-34.6124	17.0538	49
Atlantic	Bratkic et al. 2016	Global Biogeochemical cycles	DOI: 10.1002/2015GB005275	YES	GEOTRACES GA10 JC068 (UK)	1	2011	-34.6124	17.0538	44
Atlantic	Bratkic et al. 2016	Global Biogeochemical cycles	DOI: 10.1002/2015GB005275	YES	GEOTRACES GA10 JC068 (UK)	1	2011	-34.6124	17.0538	44
Atlantic	Bratkic et al. 2016	Global Biogeochemical cycles	DOI: 10.1002/2015GB005275	YES	GEOTRACES GA10 JC068 (UK)	1	2011	-34.6124	17.0538	44
Atlantic	Bratkic et al. 2016	Global Biogeochemical cycles	DOI: 10.1002/2015GB005275	YES	GEOTRACES GA10 JC068 (UK)	1	2011	-34.6124	17.0538	29
Atlantic	Bratkic et al. 2016	Global Biogeochemical cycles	DOI: 10.1002/2015GB005275	YES	GEOTRACES GA10 JC068 (UK)	1	2011	-34.6124	17.0538	29
Atlantic	Bratkic et al. 2016	Global Biogeochemical cycles	DOI: 10.1002/2015GB005275	YES	GEOTRACES GA10 JC068 (UK)	1	2011	-34.6124	17.0538	19
Atlantic	Bratkic et al. 2016	Global Biogeochemical cycles	DOI: 10.1002/2015GB005275	YES	GEOTRACES GA10 JC068 (UK)	1	2011	-34.6124	17.0538	19
Atlantic	Bratkic et al. 2016	Global Biogeochemical cycles	DOI: 10.1002/2015GB005275	YES	GEOTRACES GA10 JC068 (UK)	1	2011	-34.6124	17.0538	4
Atlantic	Bratkic et al. 2016	Global Biogeochemical cycles	DOI: 10.1002/2015GB005275	YES	GEOTRACES GA10 JC068 (UK)	1	2011	-34.6124	17.0538	4
Atlantic	Bratkic et al. 2016	Global Biogeochemical cycles	DOI: 10.1002/2015GB005275	YES	GEOTRACES GA10 JC068 (UK)	1	2011	-34.6124	17.0538	4
Atlantic	Bratkic et al. 2016	Global Biogeochemical cycles	DOI: 10.1002/2015GB005275	YES	GEOTRACES GA10 JC068 (UK)	1	2011	-34.6123	17.0538	398
Atlantic	Bratkic et al. 2016	Global Biogeochemical cycles	DOI: 10.1002/2015GB005275	YES	GEOTRACES GA10 JC068 (UK)	1	2011	-34.6123	17.0538	296
Atlantic	Bratkic et al. 2016	Global Biogeochemical cycles	DOI: 10.1002/2015GB005275	YES	GEOTRACES GA10 JC068 (UK)	1	2011	-34.6123	17.0538	247
Atlantic	Bratkic et al. 2016	Global Biogeochemical cycles	DOI: 10.1002/2015GB005275	YES	GEOTRACES GA10 JC068 (UK)	1	2011	-34.6123	17.0538	197
Atlantic	Bratkic et al. 2016	Global Biogeochemical cycles	DOI: 10.1002/2015GB005275	YES	GEOTRACES GA10 JC068 (UK)	1	2011	-34.6123	17.0538	98
Atlantic	Bratkic et al. 2016	Global Biogeochemical cycles	DOI: 10.1002/2015GB005275	YES	GEOTRACES GA10 JC068 (UK)	1	2011	-34.6123	17.0538	78
Atlantic	Bratkic et al. 2016	Global Biogeochemical cycles	DOI: 10.1002/2015GB005275	YES	GEOTRACES GA10 JC068 (UK)	1	2011	-34.6123	17.0538	58
Atlantic	Bratkic et al. 2016	Global Biogeochemical cycles	DOI: 10.1002/2015GB005275	YES	GEOTRACES GA10 JC068 (UK)	1	2011	-34.6123	17.0538	48
Atlantic	Bratkic et al. 2016	Global Biogeochemical cycles	DOI: 10.1002/2015GB005275	YES	GEOTRACES GA10 JC068 (UK)	1	2011	-34.6123	17.0538	42
Atlantic	Bratkic et al. 2016	Global Biogeochemical cycles	DOI: 10.1002/2015GB005275	YES	GEOTRACES GA10 JC068 (UK)	1	2011	-34.6123	17.0538	41
Atlantic	Bratkic et al. 2016	Global Biogeochemical cycles	DOI: 10.1002/2015GB005275	YES	GEOTRACES GA10 JC068 (UK)	1	2011	-34.6123	17.0538	29
Atlantic	Bratkic et al. 2016	Global Biogeochemical cycles	DOI: 10.1002/2015GB005275	YES	GEOTRACES GA10 JC068 (UK)	1	2011	-34.6123	17.0538	18
Atlantic	Bratkic et al. 2016	Global Biogeochemical cycles	DOI: 10.1002/2015GB005275	YES	GEOTRACES GA10 JC068 (UK)	2	2011	-35.4684	14.9962	397
Atlantic	Bratkic et al. 2016	Global Biogeochemical cycles	DOI: 10.1002/2015GB005275	YES	GEOTRACES GA10 JC068 (UK)	2	2011	-35.4684	14.9962	397
Atlantic	Bratkic et al. 2016	Global Biogeochemical cycles	DOI: 10.1002/2015GB005275	YES	GEOTRACES GA10 JC068 (UK)	2	2011	-35.4684	14.9962	298
Atlantic	Bratkic et al. 2016	Global Biogeochemical cycles	DOI: 10.1002/2015GB005275	YES	GEOTRACES GA10 JC068 (UK)	2	2011	-35.4684	14.9962	298
Atlantic	Bratkic et al. 2016	Global Biogeochemical cycles	DOI: 10.1002/2015GB005275	YES	GEOTRACES GA10 JC068 (UK)	2	2011	-35.4684	14.9962	199
Atlantic	Bratkic et al. 2016	Global Biogeochemical cycles	DOI: 10.1002/2015GB005275	YES	GEOTRACES GA10 JC068 (UK)	2	2011	-35.4684	14.9962	198
Atlantic	Bratkic et al. 2016	Global Biogeochemical cycles	DOI: 10.1002/2015GB005275	YES	GEOTRACES GA10 JC068 (UK)	2	2011	-35.4684	14.9962	97
Atlantic	Bratkic et al. 2016	Global Biogeochemical cycles	DOI: 10.1002/2015GB005275	YES	GEOTRACES GA10 JC068 (UK)	2	2011	-35.4684	14.9962	98
Atlantic	Bratkic et al. 2016	Global Biogeochemical cycles	DOI: 10.1002/2015GB005275	YES	GEOTRACES GA10 JC068 (UK)	2	2011	-35.4684	14.9962	78
Atlantic	Bratkic et al. 2016	Global Biogeochemical cycles	DOI: 10.1002/2015GB005275	YES	GEOTRACES GA10 JC068 (UK)	2	2011	-35.4684	14.9962	78
Atlantic	Bratkic et al. 2016	Global Biogeochemical cycles	DOI: 10.1002/2015GB005275	YES	GEOTRACES GA10 JC068 (UK)	2	2011	-35.4684	14.9962	63
Atlantic	Bratkic et al. 2016	Global Biogeochemical cycles	DOI: 10.1002/2015GB005275	YES	GEOTRACES GA10 JC068 (UK)	2	2011	-35.4684	14.9962	63
Atlantic	Bratkic et al. 2016	Global Biogeochemical cycles	DOI: 10.1002/2015GB005275	YES	GEOTRACES GA10 JC068 (UK)	2	2011	-35.4684	14.9962	47
Atlantic	Bratkic et al. 2016	Global Biogeochemical cycles	DOI: 10.1002/2015GB005275	YES	GEOTRACES GA10 JC068 (UK)	2	2011	-35.4684	14.9962	47
Atlantic	Bratkic et al. 2016	Global Biogeochemical cycles	DOI: 10.1002/2015GB005275	YES	GEOTRACES GA10 JC068 (UK)	2	2011	-35.4684	14.9962	43
Atlantic	Bratkic et al. 2016	Global Biogeochemical cycles	DOI: 10.1002/2015GB005275	YES	GEOTRACES GA10 JC068 (UK)	2	2011	-35.4684	14.9962	43
Atlantic	Bratkic et al. 2016	Global Biogeochemical cycles	DOI: 10.1002/2015GB005275	YES	GEOTRACES GA10 JC068 (UK)	2	2011	-35.4684	14.9962	42
Atlantic	Bratkic et al. 2016	Global Biogeochemical cycles	DOI: 10.1002/2015GB005275	YES	GEOTRACES GA10 JC068 (UK)	2	2011	-35.4684	14.9962	33
Atlantic	Bratkic et al. 2016	Global Biogeochemical cycles	DOI: 10.1002/2015GB005275	YES	GEOTRACES GA10 JC068 (UK)	2	2011	-35.4684	14.9962	35
Atlantic	Bratkic et al. 2016	Global Biogeochemical cycles	DOI: 10.1002/2015GB005275	YES	GEOTRACES GA10 JC068 (UK)	2	2011	-35.4684	14.9962	18
Atlantic	Bratkic et al. 2016	Global Biogeochemical cycles	DOI: 10.1002/2015GB005275	YES	GEOTRACES GA10 JC068 (UK)	2	2011	-35.4684	14.9962	18
Atlantic	Bratkic et al. 2016	Global Biogeochemical cycles	DOI: 10.1002/2015GB005275	YES	GEOTRACES GA10 JC068 (UK)	2	2011	-35.4684	14.9962	4
Atlantic	Bratkic et al. 2016	Global Biogeochemical cycles	DOI: 10.1002/2015GB005275	YES	GEOTRACES GA10 JC068 (UK)	2	2011	-35.4684	14.9962	4
Atlantic	Bratkic et al. 2016	Global Biogeochemical cycles	DOI: 10.1002/2015GB005275	YES	GEOTRACES GA10 JC068 (UK)	2	2011	-35.4684	14.9962	4
Atlantic	Bratkic et al. 2016	Global Biogeochemical cycles	DOI: 10.1002/2015GB005275	YES	GEOTRACES GA10 JC068 (UK)	2	2011	-35.4684	14.9962	399
Atlantic	Bratkic et al. 2016	Global Biogeochemical cycles	DOI: 10.1002/2015GB005275	YES	GEOTRACES GA10 JC068 (UK)	2	2011	-35.4684	14.9962	298
Atlantic	Bratkic et al. 2016	Global Biogeochemical cycles	DOI: 10.1002/2015GB005275	YES	GEOTRACES GA10 JC068 (UK)	2	2011	-35.4684	14.9962	246
Atlantic	Bratkic et al. 2016	Global Biogeochemical cycles	DOI: 10.1002/2015GB005275	YES	GEOTRACES GA10 JC068 (UK)	2	2011	-35.4684	14.9962	197
Atlantic	Bratkic et al. 2016	Global Biogeochemical cycles	DOI: 10.1002/2015GB005275	YES	GEOTRACES GA10 JC068 (UK)	2	2011	-35.4684	14.9962	98
Atlantic	Bratkic et al. 2016	Global Biogeochemical cycles	DOI: 10.1002/2015GB005275	YES	GEOTRACES GA10 JC068 (UK)	2	2011	-35.4684	14.9962	79
Atlantic	Bratkic et al. 2016	Global Biogeochemical cycles	DOI: 10.1002/2015GB005275	YES	GEOTRACES GA10 JC068 (UK)	3	2011	-36.3415	13.1098	4900	1.34603	0.042375
Atlantic	Bratkic et al. 2016	Global Biogeochemical cycles	DOI: 10.1002/2015GB005275	YES	GEOTRACES GA10 JC068 (UK)	3	2011	-36.3415	13.1098	4900
Atlantic	Bratkic et al. 2016	Global Biogeochemical cycles	DOI: 10.1002/2015GB005275	YES	GEOTRACES GA10 JC068 (UK)	3	2011	-36.3415	13.1098	4494	1.74485	0.0378882
Atlantic	Bratkic et al. 2016	Global Biogeochemical cycles	DOI: 10.1002/2015GB005275	YES	GEOTRACES GA10 JC068 (UK)	3	2011	-36.3415	13.1098	3993	3.63926	0.0214368
Atlantic	Bratkic et al. 2016	Global Biogeochemical cycles	DOI: 10.1002/2015GB005275	YES	GEOTRACES GA10 JC068 (UK)	3	2011	-36.3415	13.1098	3994
Atlantic	Bratkic et al. 2016	Global Biogeochemical cycles	DOI: 10.1002/2015GB005275	YES	GEOTRACES GA10 JC068 (UK)	3	2011	-36.3415	13.1098	3493
Atlantic	Bratkic et al. 2016	Global Biogeochemical cycles	DOI: 10.1002/2015GB005275	YES	GEOTRACES GA10 JC068 (UK)	3	2011	-36.3415	13.1098	2995
Atlantic	Bratkic et al. 2016	Global Biogeochemical cycles	DOI: 10.1002/2015GB005275	YES	GEOTRACES GA10 JC068 (UK)	3	2011	-36.3415	13.1098	2991	1.09676	0.0309088
Atlantic	Bratkic et al. 2016	Global Biogeochemical cycles	DOI: 10.1002/2015GB005275	YES	GEOTRACES GA10 JC068 (UK)	3	2011	-36.3415	13.1098	2493
Atlantic	Bratkic et al. 2016	Global Biogeochemical cycles	DOI: 10.1002/2015GB005275	YES	GEOTRACES GA10 JC068 (UK)	3	2011	-36.3415	13.1098	1993
Atlantic	Bratkic et al. 2016	Global Biogeochemical cycles	DOI: 10.1002/2015GB005275	YES	GEOTRACES GA10 JC068 (UK)	3	2011	-36.3415	13.1098	1993
Atlantic	Bratkic et al. 2016	Global Biogeochemical cycles	DOI: 10.1002/2015GB005275	YES	GEOTRACES GA10 JC068 (UK)	3	2011	-36.3415	13.1098	1743
Atlantic	Bratkic et al. 2016	Global Biogeochemical cycles	DOI: 10.1002/2015GB005275	YES	GEOTRACES GA10 JC068 (UK)	3	2011	-36.3415	13.1098	1495
Atlantic	Bratkic et al. 2016	Global Biogeochemical cycles	DOI: 10.1002/2015GB005275	YES	GEOTRACES GA10 JC068 (UK)	3	2011	-36.3415	13.1098	1493	1.24632	0.0269206
Atlantic	Bratkic et al. 2016	Global Biogeochemical cycles	DOI: 10.1002/2015GB005275	YES	GEOTRACES GA10 JC068 (UK)	3	2011	-36.3415	13.1098	1244	0.997059	0.0129618
Atlantic	Bratkic et al. 2016	Global Biogeochemical cycles	DOI: 10.1002/2015GB005275	YES	GEOTRACES GA10 JC068 (UK)	3	2011	-36.3415	13.1098	994	0.997059	0.0408794
Atlantic	Bratkic et al. 2016	Global Biogeochemical cycles	DOI: 10.1002/2015GB005275	YES	GEOTRACES GA10 JC068 (UK)	3	2011	-36.3415	13.1098	995
Atlantic	Bratkic et al. 2016	Global Biogeochemical cycles	DOI: 10.1002/2015GB005275	YES	GEOTRACES GA10 JC068 (UK)	3	2011	-36.3415	13.1098	745
Atlantic	Bratkic et al. 2016	Global Biogeochemical cycles	DOI: 10.1002/2015GB005275	YES	GEOTRACES GA10 JC068 (UK)	3	2011	-36.3415	13.1098	497
Atlantic	Bratkic et al. 2016	Global Biogeochemical cycles	DOI: 10.1002/2015GB005275	YES	GEOTRACES GA10 JC068 (UK)	3	2011	-36.3415	13.1098	197
Atlantic	Bratkic et al. 2016	Global Biogeochemical cycles	DOI: 10.1002/2015GB005275	YES	GEOTRACES GA10 JC068 (UK)	3	2011	-36.3415	13.1098	97
Atlantic	Bratkic et al. 2016	Global Biogeochemical cycles	DOI: 10.1002/2015GB005275	YES	GEOTRACES GA10 JC068 (UK)	3	2011	-36.3415	13.1098	47
Atlantic	Bratkic et al. 2016	Global Biogeochemical cycles	DOI: 10.1002/2015GB005275	YES	GEOTRACES GA10 JC068 (UK)	3	2011	-36.3415	13.1098	18
Atlantic	Bratkic et al. 2016	Global Biogeochemical cycles	DOI: 10.1002/2015GB005275	YES	GEOTRACES GA10 JC068 (UK)	3	2011	-36.3415	13.1098	2
Atlantic	Bratkic et al. 2016	Global Biogeochemical cycles	DOI: 10.1002/2015GB005275	YES	GEOTRACES GA10 JC068 (UK)	3	2011	-36.3605	13.0969	4852
Atlantic	Bratkic et al. 2016	Global Biogeochemical cycles	DOI: 10.1002/2015GB005275	YES	GEOTRACES GA10 JC068 (UK)	3	2011	-36.3605	13.0969	4787
Atlantic	Bratkic et al. 2016	Global Biogeochemical cycles	DOI: 10.1002/2015GB005275	YES	GEOTRACES GA10 JC068 (UK)	3	2011	-36.3605	13.0969	4489
Atlantic	Bratkic et al. 2016	Global Biogeochemical cycles	DOI: 10.1002/2015GB005275	YES	GEOTRACES GA10 JC068 (UK)	3	2011	-36.3605	13.0969	3991
Atlantic	Bratkic et al. 2016	Global Biogeochemical cycles	DOI: 10.1002/2015GB005275	YES	GEOTRACES GA10 JC068 (UK)	3	2011	-36.3605	13.0969	3492
Atlantic	Bratkic et al. 2016	Global Biogeochemical cycles	DOI: 10.1002/2015GB005275	YES	GEOTRACES GA10 JC068 (UK)	3	2011	-36.3605	13.0969	2994
Atlantic	Bratkic et al. 2016	Global Biogeochemical cycles	DOI: 10.1002/2015GB005275	YES	GEOTRACES GA10 JC068 (UK)	3	2011	-36.3605	13.0969	2742
Atlantic	Bratkic et al. 2016	Global Biogeochemical cycles	DOI: 10.1002/2015GB005275	YES	GEOTRACES GA10 JC068 (UK)	3	2011	-36.3605	13.0969	2492
Atlantic	Bratkic et al. 2016	Global Biogeochemical cycles	DOI: 10.1002/2015GB005275	YES	GEOTRACES GA10 JC068 (UK)	3	2011	-36.3605	13.0969	1994
Atlantic	Bratkic et al. 2016	Global Biogeochemical cycles	DOI: 10.1002/2015GB005275	YES	GEOTRACES GA10 JC068 (UK)	3	2011	-36.3605	13.0969	1745
Atlantic	Bratkic et al. 2016	Global Biogeochemical cycles	DOI: 10.1002/2015GB005275	YES	GEOTRACES GA10 JC068 (UK)	3	2011	-36.3605	13.0969	1497
Atlantic	Bratkic et al. 2016	Global Biogeochemical cycles	DOI: 10.1002/2015GB005275	YES	GEOTRACES GA10 JC068 (UK)	3	2011	-36.3605	13.0969	1247
Atlantic	Bratkic et al. 2016	Global Biogeochemical cycles	DOI: 10.1002/2015GB005275	YES	GEOTRACES GA10 JC068 (UK)	3	2011	-36.3605	13.0969	997
Atlantic	Bratkic et al. 2016	Global Biogeochemical cycles	DOI: 10.1002/2015GB005275	YES	GEOTRACES GA10 JC068 (UK)	3	2011	-36.3605	13.0969	748
Atlantic	Bratkic et al. 2016	Global Biogeochemical cycles	DOI: 10.1002/2015GB005275	YES	GEOTRACES GA10 JC068 (UK)	3	2011	-36.3605	13.0969	498
Atlantic	Bratkic et al. 2016	Global Biogeochemical cycles	DOI: 10.1002/2015GB005275	YES	GEOTRACES GA10 JC068 (UK)	3	2011	-36.3605	13.0969	398
Atlantic	Bratkic et al. 2016	Global Biogeochemical cycles	DOI: 10.1002/2015GB005275	YES	GEOTRACES GA10 JC068 (UK)	3	2011	-36.3605	13.0969	298
Atlantic	Bratkic et al. 2016	Global Biogeochemical cycles	DOI: 10.1002/2015GB005275	YES	GEOTRACES GA10 JC068 (UK)	3	2011	-36.3605	13.0969	199
Atlantic	Bratkic et al. 2016	Global Biogeochemical cycles	DOI: 10.1002/2015GB005275	YES	GEOTRACES GA10 JC068 (UK)	3	2011	-36.3605	13.0969	149
Atlantic	Bratkic et al. 2016	Global Biogeochemical cycles	DOI: 10.1002/2015GB005275	YES	GEOTRACES GA10 JC068 (UK)	3	2011	-36.3605	13.0969	98
Atlantic	Bratkic et al. 2016	Global Biogeochemical cycles	DOI: 10.1002/2015GB005275	YES	GEOTRACES GA10 JC068 (UK)	3	2011	-36.3605	13.0969	74
Atlantic	Bratkic et al. 2016	Global Biogeochemical cycles	DOI: 10.1002/2015GB005275	YES	GEOTRACES GA10 JC068 (UK)	3	2011	-36.3605	13.0969	48
Atlantic	Bratkic et al. 2016	Global Biogeochemical cycles	DOI: 10.1002/2015GB005275	YES	GEOTRACES GA10 JC068 (UK)	3	2011	-36.3605	13.0969	34
Atlantic	Bratkic et al. 2016	Global Biogeochemical cycles	DOI: 10.1002/2015GB005275	YES	GEOTRACES GA10 JC068 (UK)	3	2011	-36.3605	13.0969	19
Atlantic	Bratkic et al. 2016	Global Biogeochemical cycles	DOI: 10.1002/2015GB005275	YES	GEOTRACES GA10 JC068 (UK)	3	2011	-36.3431	13.1062	396		0.0952191
Atlantic	Bratkic et al. 2016	Global Biogeochemical cycles	DOI: 10.1002/2015GB005275	YES	GEOTRACES GA10 JC068 (UK)	3	2011	-36.3431	13.1062	396
Atlantic	Bratkic et al. 2016	Global Biogeochemical cycles	DOI: 10.1002/2015GB005275	YES	GEOTRACES GA10 JC068 (UK)	3	2011	-36.3431	13.1062	297
Atlantic	Bratkic et al. 2016	Global Biogeochemical cycles	DOI: 10.1002/2015GB005275	YES	GEOTRACES GA10 JC068 (UK)	3	2011	-36.3431	13.1062	198	1.79471	0.0483573
Atlantic	Bratkic et al. 2016	Global Biogeochemical cycles	DOI: 10.1002/2015GB005275	YES	GEOTRACES GA10 JC068 (UK)	3	2011	-36.3431	13.1062	198
Atlantic	Bratkic et al. 2016	Global Biogeochemical cycles	DOI: 10.1002/2015GB005275	YES	GEOTRACES GA10 JC068 (UK)	3	2011	-36.3431	13.1062	117
Atlantic	Bratkic et al. 2016	Global Biogeochemical cycles	DOI: 10.1002/2015GB005275	YES	GEOTRACES GA10 JC068 (UK)	3	2011	-36.3431	13.1062	117
Atlantic	Bratkic et al. 2016	Global Biogeochemical cycles	DOI: 10.1002/2015GB005275	YES	GEOTRACES GA10 JC068 (UK)	3	2011	-36.3431	13.1062	97	1.09676	0.0264221
Atlantic	Bratkic et al. 2016	Global Biogeochemical cycles	DOI: 10.1002/2015GB005275	YES	GEOTRACES GA10 JC068 (UK)	3	2011	-36.3431	13.1062	97
Atlantic	Bratkic et al. 2016	Global Biogeochemical cycles	DOI: 10.1002/2015GB005275	YES	GEOTRACES GA10 JC068 (UK)	3	2011	-36.3431	13.1062	73	1.24632	0.0498529
Atlantic	Bratkic et al. 2016	Global Biogeochemical cycles	DOI: 10.1002/2015GB005275	YES	GEOTRACES GA10 JC068 (UK)	3	2011	-36.3431	13.1062	72
Atlantic	Bratkic et al. 2016	Global Biogeochemical cycles	DOI: 10.1002/2015GB005275	YES	GEOTRACES GA10 JC068 (UK)	3	2011	-36.3431	13.1062	58		0.0413779
Atlantic	Bratkic et al. 2016	Global Biogeochemical cycles	DOI: 10.1002/2015GB005275	YES	GEOTRACES GA10 JC068 (UK)	3	2011	-36.3431	13.1062	58
Atlantic	Bratkic et al. 2016	Global Biogeochemical cycles	DOI: 10.1002/2015GB005275	YES	GEOTRACES GA10 JC068 (UK)	3	2011	-36.3431	13.1062	58
Atlantic	Bratkic et al. 2016	Global Biogeochemical cycles	DOI: 10.1002/2015GB005275	YES	GEOTRACES GA10 JC068 (UK)	3	2011	-36.3431	13.1062	47		0.0274191
Atlantic	Bratkic et al. 2016	Global Biogeochemical cycles	DOI: 10.1002/2015GB005275	YES	GEOTRACES GA10 JC068 (UK)	3	2011	-36.3431	13.1062	46
Atlantic	Bratkic et al. 2016	Global Biogeochemical cycles	DOI: 10.1002/2015GB005275	YES	GEOTRACES GA10 JC068 (UK)	3	2011	-36.3431	13.1062	38
Atlantic	Bratkic et al. 2016	Global Biogeochemical cycles	DOI: 10.1002/2015GB005275	YES	GEOTRACES GA10 JC068 (UK)	3	2011	-36.3431	13.1062	27
Atlantic	Bratkic et al. 2016	Global Biogeochemical cycles	DOI: 10.1002/2015GB005275	YES	GEOTRACES GA10 JC068 (UK)	3	2011	-36.3431	13.1062	27
Atlantic	Bratkic et al. 2016	Global Biogeochemical cycles	DOI: 10.1002/2015GB005275	YES	GEOTRACES GA10 JC068 (UK)	3	2011	-36.3431	13.1062	17	0.997059	0.0648088
Atlantic	Bratkic et al. 2016	Global Biogeochemical cycles	DOI: 10.1002/2015GB005275	YES	GEOTRACES GA10 JC068 (UK)	3	2011	-36.3431	13.1062	18
Atlantic	Bratkic et al. 2016	Global Biogeochemical cycles	DOI: 10.1002/2015GB005275	YES	GEOTRACES GA10 JC068 (UK)	3	2011	-36.3431	13.1062	3	1.09676	0.0648088
Atlantic	Bratkic et al. 2016	Global Biogeochemical cycles	DOI: 10.1002/2015GB005275	YES	GEOTRACES GA10 JC068 (UK)	3	2011	-36.3431	13.1062	3
Atlantic	Bratkic et al. 2016	Global Biogeochemical cycles	DOI: 10.1002/2015GB005275	YES	GEOTRACES GA10 JC068 (UK)	3	2011	-36.3431	13.1062	2
Atlantic	Bratkic et al. 2016	Global Biogeochemical cycles	DOI: 10.1002/2015GB005275	YES	GEOTRACES GA10 JC068 (UK)	4	2011	-38.4006	10.4016	394
Atlantic	Bratkic et al. 2016	Global Biogeochemical cycles	DOI: 10.1002/2015GB005275	YES	GEOTRACES GA10 JC068 (UK)	4	2011	-38.4006	10.4016	395
Atlantic	Bratkic et al. 2016	Global Biogeochemical cycles	DOI: 10.1002/2015GB005275	YES	GEOTRACES GA10 JC068 (UK)	4	2011	-38.4006	10.4016	297
Atlantic	Bratkic et al. 2016	Global Biogeochemical cycles	DOI: 10.1002/2015GB005275	YES	GEOTRACES GA10 JC068 (UK)	4	2011	-38.4006	10.4016	296
Atlantic	Bratkic et al. 2016	Global Biogeochemical cycles	DOI: 10.1002/2015GB005275	YES	GEOTRACES GA10 JC068 (UK)	4	2011	-38.4006	10.4016	196
Atlantic	Bratkic et al. 2016	Global Biogeochemical cycles	DOI: 10.1002/2015GB005275	YES	GEOTRACES GA10 JC068 (UK)	4	2011	-38.4006	10.4016	197
Atlantic	Bratkic et al. 2016	Global Biogeochemical cycles	DOI: 10.1002/2015GB005275	YES	GEOTRACES GA10 JC068 (UK)	4	2011	-38.4006	10.4016	127
Atlantic	Bratkic et al. 2016	Global Biogeochemical cycles	DOI: 10.1002/2015GB005275	YES	GEOTRACES GA10 JC068 (UK)	4	2011	-38.4006	10.4016	127
Atlantic	Bratkic et al. 2016	Global Biogeochemical cycles	DOI: 10.1002/2015GB005275	YES	GEOTRACES GA10 JC068 (UK)	4	2011	-38.4006	10.4016	97
Atlantic	Bratkic et al. 2016	Global Biogeochemical cycles	DOI: 10.1002/2015GB005275	YES	GEOTRACES GA10 JC068 (UK)	4	2011	-38.4006	10.4016	98
Atlantic	Bratkic et al. 2016	Global Biogeochemical cycles	DOI: 10.1002/2015GB005275	YES	GEOTRACES GA10 JC068 (UK)	4	2011	-38.4006	10.4016	78
Atlantic	Bratkic et al. 2016	Global Biogeochemical cycles	DOI: 10.1002/2015GB005275	YES	GEOTRACES GA10 JC068 (UK)	4	2011	-38.4006	10.4016	78
Atlantic	Bratkic et al. 2016	Global Biogeochemical cycles	DOI: 10.1002/2015GB005275	YES	GEOTRACES GA10 JC068 (UK)	4	2011	-38.4006	10.4016	58
Atlantic	Bratkic et al. 2016	Global Biogeochemical cycles	DOI: 10.1002/2015GB005275	YES	GEOTRACES GA10 JC068 (UK)	4	2011	-38.4006	10.4016	58
Atlantic	Bratkic et al. 2016	Global Biogeochemical cycles	DOI: 10.1002/2015GB005275	YES	GEOTRACES GA10 JC068 (UK)	4	2011	-38.4006	10.4016	48
Atlantic	Bratkic et al. 2016	Global Biogeochemical cycles	DOI: 10.1002/2015GB005275	YES	GEOTRACES GA10 JC068 (UK)	4	2011	-38.4006	10.4016	48
Atlantic	Bratkic et al. 2016	Global Biogeochemical cycles	DOI: 10.1002/2015GB005275	YES	GEOTRACES GA10 JC068 (UK)	4	2011	-38.4006	10.4016	38
Atlantic	Bratkic et al. 2016	Global Biogeochemical cycles	DOI: 10.1002/2015GB005275	YES	GEOTRACES GA10 JC068 (UK)	4	2011	-38.4006	10.4016	38
Atlantic	Bratkic et al. 2016	Global Biogeochemical cycles	DOI: 10.1002/2015GB005275	YES	GEOTRACES GA10 JC068 (UK)	4	2011	-38.4006	10.4016	28
Atlantic	Bratkic et al. 2016	Global Biogeochemical cycles	DOI: 10.1002/2015GB005275	YES	GEOTRACES GA10 JC068 (UK)	4	2011	-38.4006	10.4016	27
Atlantic	Bratkic et al. 2016	Global Biogeochemical cycles	DOI: 10.1002/2015GB005275	YES	GEOTRACES GA10 JC068 (UK)	4	2011	-38.4006	10.4016	18
Atlantic	Bratkic et al. 2016	Global Biogeochemical cycles	DOI: 10.1002/2015GB005275	YES	GEOTRACES GA10 JC068 (UK)	4	2011	-38.4006	10.4016	18
Atlantic	Bratkic et al. 2016	Global Biogeochemical cycles	DOI: 10.1002/2015GB005275	YES	GEOTRACES GA10 JC068 (UK)	4	2011	-38.4006	10.4016	3
Atlantic	Bratkic et al. 2016	Global Biogeochemical cycles	DOI: 10.1002/2015GB005275	YES	GEOTRACES GA10 JC068 (UK)	4	2011	-38.4006	10.4016	3
Atlantic	Bratkic et al. 2016	Global Biogeochemical cycles	DOI: 10.1002/2015GB005275	YES	GEOTRACES GA10 JC068 (UK)	5	2012	-39.9997	5.51773	398
Atlantic	Bratkic et al. 2016	Global Biogeochemical cycles	DOI: 10.1002/2015GB005275	YES	GEOTRACES GA10 JC068 (UK)	5	2012	-39.9997	5.51773	398
Atlantic	Bratkic et al. 2016	Global Biogeochemical cycles	DOI: 10.1002/2015GB005275	YES	GEOTRACES GA10 JC068 (UK)	5	2012	-39.9997	5.51773	299
Atlantic	Bratkic et al. 2016	Global Biogeochemical cycles	DOI: 10.1002/2015GB005275	YES	GEOTRACES GA10 JC068 (UK)	5	2012	-39.9997	5.51773	298
Atlantic	Bratkic et al. 2016	Global Biogeochemical cycles	DOI: 10.1002/2015GB005275	YES	GEOTRACES GA10 JC068 (UK)	5	2012	-39.9997	5.51773	200
Atlantic	Bratkic et al. 2016	Global Biogeochemical cycles	DOI: 10.1002/2015GB005275	YES	GEOTRACES GA10 JC068 (UK)	5	2012	-39.9997	5.51773	200
Atlantic	Bratkic et al. 2016	Global Biogeochemical cycles	DOI: 10.1002/2015GB005275	YES	GEOTRACES GA10 JC068 (UK)	5	2012	-39.9997	5.51773	124
Atlantic	Bratkic et al. 2016	Global Biogeochemical cycles	DOI: 10.1002/2015GB005275	YES	GEOTRACES GA10 JC068 (UK)	5	2012	-39.9997	5.51773	124
Atlantic	Bratkic et al. 2016	Global Biogeochemical cycles	DOI: 10.1002/2015GB005275	YES	GEOTRACES GA10 JC068 (UK)	5	2012	-39.9997	5.51773	100
Atlantic	Bratkic et al. 2016	Global Biogeochemical cycles	DOI: 10.1002/2015GB005275	YES	GEOTRACES GA10 JC068 (UK)	5	2012	-39.9997	5.51773	99
Atlantic	Bratkic et al. 2016	Global Biogeochemical cycles	DOI: 10.1002/2015GB005275	YES	GEOTRACES GA10 JC068 (UK)	5	2012	-39.9997	5.51773	79
Atlantic	Bratkic et al. 2016	Global Biogeochemical cycles	DOI: 10.1002/2015GB005275	YES	GEOTRACES GA10 JC068 (UK)	5	2012	-39.9997	5.51773	80
Atlantic	Bratkic et al. 2016	Global Biogeochemical cycles	DOI: 10.1002/2015GB005275	YES	GEOTRACES GA10 JC068 (UK)	5	2012	-39.9997	5.51773	61
Atlantic	Bratkic et al. 2016	Global Biogeochemical cycles	DOI: 10.1002/2015GB005275	YES	GEOTRACES GA10 JC068 (UK)	5	2012	-39.9997	5.51773	60
Atlantic	Bratkic et al. 2016	Global Biogeochemical cycles	DOI: 10.1002/2015GB005275	YES	GEOTRACES GA10 JC068 (UK)	5	2012	-39.9997	5.51773	50
Atlantic	Bratkic et al. 2016	Global Biogeochemical cycles	DOI: 10.1002/2015GB005275	YES	GEOTRACES GA10 JC068 (UK)	5	2012	-39.9997	5.51773	49
Atlantic	Bratkic et al. 2016	Global Biogeochemical cycles	DOI: 10.1002/2015GB005275	YES	GEOTRACES GA10 JC068 (UK)	5	2012	-39.9997	5.51773	40
Atlantic	Bratkic et al. 2016	Global Biogeochemical cycles	DOI: 10.1002/2015GB005275	YES	GEOTRACES GA10 JC068 (UK)	5	2012	-39.9997	5.51773	41
Atlantic	Bratkic et al. 2016	Global Biogeochemical cycles	DOI: 10.1002/2015GB005275	YES	GEOTRACES GA10 JC068 (UK)	5	2012	-39.9997	5.51773	30
Atlantic	Bratkic et al. 2016	Global Biogeochemical cycles	DOI: 10.1002/2015GB005275	YES	GEOTRACES GA10 JC068 (UK)	5	2012	-39.9997	5.51773	30
Atlantic	Bratkic et al. 2016	Global Biogeochemical cycles	DOI: 10.1002/2015GB005275	YES	GEOTRACES GA10 JC068 (UK)	5	2012	-39.9997	5.51773	20
Atlantic	Bratkic et al. 2016	Global Biogeochemical cycles	DOI: 10.1002/2015GB005275	YES	GEOTRACES GA10 JC068 (UK)	5	2012	-39.9997	5.51773	20
Atlantic	Bratkic et al. 2016	Global Biogeochemical cycles	DOI: 10.1002/2015GB005275	YES	GEOTRACES GA10 JC068 (UK)	5	2012	-39.9997	5.51773	6
Atlantic	Bratkic et al. 2016	Global Biogeochemical cycles	DOI: 10.1002/2015GB005275	YES	GEOTRACES GA10 JC068 (UK)	5	2012	-39.9997	5.51773	5
Atlantic	Bratkic et al. 2016	Global Biogeochemical cycles	DOI: 10.1002/2015GB005275	YES	GEOTRACES GA10 JC068 (UK)	6.5	2012	-40.0148	-0.49992	2989
Atlantic	Bratkic et al. 2016	Global Biogeochemical cycles	DOI: 10.1002/2015GB005275	YES	GEOTRACES GA10 JC068 (UK)	6.5	2012	-40.0148	-0.49992	2992	1.39588	0.0249265
Atlantic	Bratkic et al. 2016	Global Biogeochemical cycles	DOI: 10.1002/2015GB005275	YES	GEOTRACES GA10 JC068 (UK)	6.5	2012	-40.0148	-0.49992	2491
Atlantic	Bratkic et al. 2016	Global Biogeochemical cycles	DOI: 10.1002/2015GB005275	YES	GEOTRACES GA10 JC068 (UK)	6.5	2012	-40.0148	-0.49992	2493	1.34603	0.0284162
Atlantic	Bratkic et al. 2016	Global Biogeochemical cycles	DOI: 10.1002/2015GB005275	YES	GEOTRACES GA10 JC068 (UK)	6.5	2012	-40.0148	-0.49992	1995
Atlantic	Bratkic et al. 2016	Global Biogeochemical cycles	DOI: 10.1002/2015GB005275	YES	GEOTRACES GA10 JC068 (UK)	6.5	2012	-40.0148	-0.49992	1993	1.59529	0.0358941
Atlantic	Bratkic et al. 2016	Global Biogeochemical cycles	DOI: 10.1002/2015GB005275	YES	GEOTRACES GA10 JC068 (UK)	6.5	2012	-40.0148	-0.49992	1494
Atlantic	Bratkic et al. 2016	Global Biogeochemical cycles	DOI: 10.1002/2015GB005275	YES	GEOTRACES GA10 JC068 (UK)	6.5	2012	-40.0148	-0.49992	1494	1.29618	0.025425
Atlantic	Bratkic et al. 2016	Global Biogeochemical cycles	DOI: 10.1002/2015GB005275	YES	GEOTRACES GA10 JC068 (UK)	6.5	2012	-40.0148	-0.49992	1243	1.54544	0.0134603
Atlantic	Bratkic et al. 2016	Global Biogeochemical cycles	DOI: 10.1002/2015GB005275	YES	GEOTRACES GA10 JC068 (UK)	6.5	2012	-40.0148	-0.49992	995	1.19647	0.0244279
Atlantic	Bratkic et al. 2016	Global Biogeochemical cycles	DOI: 10.1002/2015GB005275	YES	GEOTRACES GA10 JC068 (UK)	6.5	2012	-40.0148	-0.49992	745	1.29618	0.0204397
Atlantic	Bratkic et al. 2016	Global Biogeochemical cycles	DOI: 10.1002/2015GB005275	YES	GEOTRACES GA10 JC068 (UK)	6.5	2012	-40.0148	-0.49992	496	1.19647	0.0279176
Atlantic	Bratkic et al. 2016	Global Biogeochemical cycles	DOI: 10.1002/2015GB005275	YES	GEOTRACES GA10 JC068 (UK)	6.5	2012	-40.0148	-0.49992	346
Atlantic	Bratkic et al. 2016	Global Biogeochemical cycles	DOI: 10.1002/2015GB005275	YES	GEOTRACES GA10 JC068 (UK)	6.5	2012	-40.0148	-0.49992	197	0.897353	0.0264221
Atlantic	Bratkic et al. 2016	Global Biogeochemical cycles	DOI: 10.1002/2015GB005275	YES	GEOTRACES GA10 JC068 (UK)	6.5	2012	-40.0148	-0.49992	98
Atlantic	Bratkic et al. 2016	Global Biogeochemical cycles	DOI: 10.1002/2015GB005275	YES	GEOTRACES GA10 JC068 (UK)	6.5	2012	-40.0148	-0.49992	77		0.0279176
Atlantic	Bratkic et al. 2016	Global Biogeochemical cycles	DOI: 10.1002/2015GB005275	YES	GEOTRACES GA10 JC068 (UK)	6.5	2012	-40.0148	-0.49992	57	1.49559
Atlantic	Bratkic et al. 2016	Global Biogeochemical cycles	DOI: 10.1002/2015GB005275	YES	GEOTRACES GA10 JC068 (UK)	6.5	2012	-40.0148	-0.49992	47
Atlantic	Bratkic et al. 2016	Global Biogeochemical cycles	DOI: 10.1002/2015GB005275	YES	GEOTRACES GA10 JC068 (UK)	6.5	2012	-40.0148	-0.49992	37
Atlantic	Bratkic et al. 2016	Global Biogeochemical cycles	DOI: 10.1002/2015GB005275	YES	GEOTRACES GA10 JC068 (UK)	6.5	2012	-40.0148	-0.49992	37
Atlantic	Bratkic et al. 2016	Global Biogeochemical cycles	DOI: 10.1002/2015GB005275	YES	GEOTRACES GA10 JC068 (UK)	6.5	2012	-40.0148	-0.49992	27	0.8475	0.0353956
Atlantic	Bratkic et al. 2016	Global Biogeochemical cycles	DOI: 10.1002/2015GB005275	YES	GEOTRACES GA10 JC068 (UK)	6.5	2012	-40.0148	-0.49992	17
Atlantic	Bratkic et al. 2016	Global Biogeochemical cycles	DOI: 10.1002/2015GB005275	YES	GEOTRACES GA10 JC068 (UK)	6.5	2012	-40.0148	-0.49992	2	0.997059	0.0478588
Atlantic	Bratkic et al. 2016	Global Biogeochemical cycles	DOI: 10.1002/2015GB005275	YES	GEOTRACES GA10 JC068 (UK)	6.5	2012	-40.0148	-0.49992	2
Atlantic	Bratkic et al. 2016	Global Biogeochemical cycles	DOI: 10.1002/2015GB005275	YES	GEOTRACES GA10 JC068 (UK)	7	2012	-40.0009	-3.03428	4432
Atlantic	Bratkic et al. 2016	Global Biogeochemical cycles	DOI: 10.1002/2015GB005275	YES	GEOTRACES GA10 JC068 (UK)	7	2012	-40.0009	-3.03428	4288
Atlantic	Bratkic et al. 2016	Global Biogeochemical cycles	DOI: 10.1002/2015GB005275	YES	GEOTRACES GA10 JC068 (UK)	7	2012	-40.0009	-3.03428	3988
Atlantic	Bratkic et al. 2016	Global Biogeochemical cycles	DOI: 10.1002/2015GB005275	YES	GEOTRACES GA10 JC068 (UK)	7	2012	-40.0009	-3.03428	3490
Atlantic	Bratkic et al. 2016	Global Biogeochemical cycles	DOI: 10.1002/2015GB005275	YES	GEOTRACES GA10 JC068 (UK)	7	2012	-40.0009	-3.03428	3241
Atlantic	Bratkic et al. 2016	Global Biogeochemical cycles	DOI: 10.1002/2015GB005275	YES	GEOTRACES GA10 JC068 (UK)	7	2012	-40.0009	-3.03428	2990
Atlantic	Bratkic et al. 2016	Global Biogeochemical cycles	DOI: 10.1002/2015GB005275	YES	GEOTRACES GA10 JC068 (UK)	7	2012	-40.0009	-3.03428	2741
Atlantic	Bratkic et al. 2016	Global Biogeochemical cycles	DOI: 10.1002/2015GB005275	YES	GEOTRACES GA10 JC068 (UK)	7	2012	-40.0009	-3.03428	2492
Atlantic	Bratkic et al. 2016	Global Biogeochemical cycles	DOI: 10.1002/2015GB005275	YES	GEOTRACES GA10 JC068 (UK)	7	2012	-40.0009	-3.03428	1993
Atlantic	Bratkic et al. 2016	Global Biogeochemical cycles	DOI: 10.1002/2015GB005275	YES	GEOTRACES GA10 JC068 (UK)	7	2012	-40.0009	-3.03428	1744
Atlantic	Bratkic et al. 2016	Global Biogeochemical cycles	DOI: 10.1002/2015GB005275	YES	GEOTRACES GA10 JC068 (UK)	7	2012	-40.0009	-3.03428	1492
Atlantic	Bratkic et al. 2016	Global Biogeochemical cycles	DOI: 10.1002/2015GB005275	YES	GEOTRACES GA10 JC068 (UK)	7	2012	-40.0009	-3.03428	1244
Atlantic	Bratkic et al. 2016	Global Biogeochemical cycles	DOI: 10.1002/2015GB005275	YES	GEOTRACES GA10 JC068 (UK)	7	2012	-40.0009	-3.03428	994
Atlantic	Bratkic et al. 2016	Global Biogeochemical cycles	DOI: 10.1002/2015GB005275	YES	GEOTRACES GA10 JC068 (UK)	7	2012	-40.0009	-3.03428	746
Atlantic	Bratkic et al. 2016	Global Biogeochemical cycles	DOI: 10.1002/2015GB005275	YES	GEOTRACES GA10 JC068 (UK)	7	2012	-40.0009	-3.03428	496
Atlantic	Bratkic et al. 2016	Global Biogeochemical cycles	DOI: 10.1002/2015GB005275	YES	GEOTRACES GA10 JC068 (UK)	7	2012	-40.0009	-3.03428	398
Atlantic	Bratkic et al. 2016	Global Biogeochemical cycles	DOI: 10.1002/2015GB005275	YES	GEOTRACES GA10 JC068 (UK)	7	2012	-40.0009	-3.03428	298
Atlantic	Bratkic et al. 2016	Global Biogeochemical cycles	DOI: 10.1002/2015GB005275	YES	GEOTRACES GA10 JC068 (UK)	7	2012	-40.0009	-3.03428	198
Atlantic	Bratkic et al. 2016	Global Biogeochemical cycles	DOI: 10.1002/2015GB005275	YES	GEOTRACES GA10 JC068 (UK)	7	2012	-40.0009	-3.03428	147
Atlantic	Bratkic et al. 2016	Global Biogeochemical cycles	DOI: 10.1002/2015GB005275	YES	GEOTRACES GA10 JC068 (UK)	7	2012	-40.0009	-3.03428	98
Atlantic	Bratkic et al. 2016	Global Biogeochemical cycles	DOI: 10.1002/2015GB005275	YES	GEOTRACES GA10 JC068 (UK)	7	2012	-40.0009	-3.03428	73
Atlantic	Bratkic et al. 2016	Global Biogeochemical cycles	DOI: 10.1002/2015GB005275	YES	GEOTRACES GA10 JC068 (UK)	7	2012	-40.0009	-3.03428	49
Atlantic	Bratkic et al. 2016	Global Biogeochemical cycles	DOI: 10.1002/2015GB005275	YES	GEOTRACES GA10 JC068 (UK)	7	2012	-40.0009	-3.03428	33
Atlantic	Bratkic et al. 2016	Global Biogeochemical cycles	DOI: 10.1002/2015GB005275	YES	GEOTRACES GA10 JC068 (UK)	7	2012	-40.0009	-3.03428	18
Atlantic	Bratkic et al. 2016	Global Biogeochemical cycles	DOI: 10.1002/2015GB005275	YES	GEOTRACES GA10 JC068 (UK)	8	2012	-39.9993	-9.66638	397
Atlantic	Bratkic et al. 2016	Global Biogeochemical cycles	DOI: 10.1002/2015GB005275	YES	GEOTRACES GA10 JC068 (UK)	8	2012	-39.9993	-9.66638	397	1.54544
Atlantic	Bratkic et al. 2016	Global Biogeochemical cycles	DOI: 10.1002/2015GB005275	YES	GEOTRACES GA10 JC068 (UK)	8	2012	-39.9993	-9.66638	298	3.39
Atlantic	Bratkic et al. 2016	Global Biogeochemical cycles	DOI: 10.1002/2015GB005275	YES	GEOTRACES GA10 JC068 (UK)	8	2012	-39.9993	-9.66638	298
Atlantic	Bratkic et al. 2016	Global Biogeochemical cycles	DOI: 10.1002/2015GB005275	YES	GEOTRACES GA10 JC068 (UK)	8	2012	-39.9993	-9.66638	199
Atlantic	Bratkic et al. 2016	Global Biogeochemical cycles	DOI: 10.1002/2015GB005275	YES	GEOTRACES GA10 JC068 (UK)	8	2012	-39.9993	-9.66638	199
Atlantic	Bratkic et al. 2016	Global Biogeochemical cycles	DOI: 10.1002/2015GB005275	YES	GEOTRACES GA10 JC068 (UK)	8	2012	-39.9993	-9.66638	100	1.19647
Atlantic	Bratkic et al. 2016	Global Biogeochemical cycles	DOI: 10.1002/2015GB005275	YES	GEOTRACES GA10 JC068 (UK)	8	2012	-39.9993	-9.66638	99
Atlantic	Bratkic et al. 2016	Global Biogeochemical cycles	DOI: 10.1002/2015GB005275	YES	GEOTRACES GA10 JC068 (UK)	8	2012	-39.9993	-9.66638	74
Atlantic	Bratkic et al. 2016	Global Biogeochemical cycles	DOI: 10.1002/2015GB005275	YES	GEOTRACES GA10 JC068 (UK)	8	2012	-39.9993	-9.66638	74	1.04691
Atlantic	Bratkic et al. 2016	Global Biogeochemical cycles	DOI: 10.1002/2015GB005275	YES	GEOTRACES GA10 JC068 (UK)	8	2012	-39.9993	-9.66638	54
Atlantic	Bratkic et al. 2016	Global Biogeochemical cycles	DOI: 10.1002/2015GB005275	YES	GEOTRACES GA10 JC068 (UK)	8	2012	-39.9993	-9.66638	54
Atlantic	Bratkic et al. 2016	Global Biogeochemical cycles	DOI: 10.1002/2015GB005275	YES	GEOTRACES GA10 JC068 (UK)	8	2012	-39.9993	-9.66638	49	1.29618
Atlantic	Bratkic et al. 2016	Global Biogeochemical cycles	DOI: 10.1002/2015GB005275	YES	GEOTRACES GA10 JC068 (UK)	8	2012	-39.9993	-9.66638	49
Atlantic	Bratkic et al. 2016	Global Biogeochemical cycles	DOI: 10.1002/2015GB005275	YES	GEOTRACES GA10 JC068 (UK)	8	2012	-39.9993	-9.66638	41	1.695
Atlantic	Bratkic et al. 2016	Global Biogeochemical cycles	DOI: 10.1002/2015GB005275	YES	GEOTRACES GA10 JC068 (UK)	8	2012	-39.9993	-9.66638	41
Atlantic	Bratkic et al. 2016	Global Biogeochemical cycles	DOI: 10.1002/2015GB005275	YES	GEOTRACES GA10 JC068 (UK)	8	2012	-39.9993	-9.66638	41
Atlantic	Bratkic et al. 2016	Global Biogeochemical cycles	DOI: 10.1002/2015GB005275	YES	GEOTRACES GA10 JC068 (UK)	8	2012	-39.9993	-9.66638	34	0.997059
Atlantic	Bratkic et al. 2016	Global Biogeochemical cycles	DOI: 10.1002/2015GB005275	YES	GEOTRACES GA10 JC068 (UK)	8	2012	-39.9993	-9.66638	34
Atlantic	Bratkic et al. 2016	Global Biogeochemical cycles	DOI: 10.1002/2015GB005275	YES	GEOTRACES GA10 JC068 (UK)	8	2012	-39.9993	-9.66638	19
Atlantic	Bratkic et al. 2016	Global Biogeochemical cycles	DOI: 10.1002/2015GB005275	YES	GEOTRACES GA10 JC068 (UK)	8	2012	-39.9993	-9.66638	19	0.598235
Atlantic	Bratkic et al. 2016	Global Biogeochemical cycles	DOI: 10.1002/2015GB005275	YES	GEOTRACES GA10 JC068 (UK)	8	2012	-39.9993	-9.66638	4	1.54544
Atlantic	Bratkic et al. 2016	Global Biogeochemical cycles	DOI: 10.1002/2015GB005275	YES	GEOTRACES GA10 JC068 (UK)	8	2012	-39.9993	-9.66638	4
Atlantic	Bratkic et al. 2016	Global Biogeochemical cycles	DOI: 10.1002/2015GB005275	YES	GEOTRACES GA10 JC068 (UK)	8	2012	-39.9993	-9.66638	4
Atlantic	Bratkic et al. 2016	Global Biogeochemical cycles	DOI: 10.1002/2015GB005275	YES	GEOTRACES GA10 JC068 (UK)	8	2012	-39.9992	-9.66801	3375	1.09676	0.0393838
Atlantic	Bratkic et al. 2016	Global Biogeochemical cycles	DOI: 10.1002/2015GB005275	YES	GEOTRACES GA10 JC068 (UK)	8	2012	-39.9992	-9.66801	3310
Atlantic	Bratkic et al. 2016	Global Biogeochemical cycles	DOI: 10.1002/2015GB005275	YES	GEOTRACES GA10 JC068 (UK)	8	2012	-39.9992	-9.66801	2991	0.598235	0.0294132
Atlantic	Bratkic et al. 2016	Global Biogeochemical cycles	DOI: 10.1002/2015GB005275	YES	GEOTRACES GA10 JC068 (UK)	8	2012	-39.9992	-9.66801	2741
Atlantic	Bratkic et al. 2016	Global Biogeochemical cycles	DOI: 10.1002/2015GB005275	YES	GEOTRACES GA10 JC068 (UK)	8	2012	-39.9992	-9.66801	2492	1.09676	0.0134603
Atlantic	Bratkic et al. 2016	Global Biogeochemical cycles	DOI: 10.1002/2015GB005275	YES	GEOTRACES GA10 JC068 (UK)	8	2012	-39.9992	-9.66801	2244
Atlantic	Bratkic et al. 2016	Global Biogeochemical cycles	DOI: 10.1002/2015GB005275	YES	GEOTRACES GA10 JC068 (UK)	8	2012	-39.9992	-9.66801	1993	1.19647	0.0269206
Atlantic	Bratkic et al. 2016	Global Biogeochemical cycles	DOI: 10.1002/2015GB005275	YES	GEOTRACES GA10 JC068 (UK)	8	2012	-39.9992	-9.66801	1744
Atlantic	Bratkic et al. 2016	Global Biogeochemical cycles	DOI: 10.1002/2015GB005275	YES	GEOTRACES GA10 JC068 (UK)	8	2012	-39.9992	-9.66801	1495	1.24632	0.0134603
Atlantic	Bratkic et al. 2016	Global Biogeochemical cycles	DOI: 10.1002/2015GB005275	YES	GEOTRACES GA10 JC068 (UK)	8	2012	-39.9992	-9.66801	1246
Atlantic	Bratkic et al. 2016	Global Biogeochemical cycles	DOI: 10.1002/2015GB005275	YES	GEOTRACES GA10 JC068 (UK)	8	2012	-39.9992	-9.66801	996	1.24632	0.0363926
Atlantic	Bratkic et al. 2016	Global Biogeochemical cycles	DOI: 10.1002/2015GB005275	YES	GEOTRACES GA10 JC068 (UK)	8	2012	-39.9992	-9.66801	747	1.59529	0.0314073
Atlantic	Bratkic et al. 2016	Global Biogeochemical cycles	DOI: 10.1002/2015GB005275	YES	GEOTRACES GA10 JC068 (UK)	8	2012	-39.9992	-9.66801	499	3.19059	0.0304103
Atlantic	Bratkic et al. 2016	Global Biogeochemical cycles	DOI: 10.1002/2015GB005275	YES	GEOTRACES GA10 JC068 (UK)	8	2012	-39.9992	-9.66801	398
Atlantic	Bratkic et al. 2016	Global Biogeochemical cycles	DOI: 10.1002/2015GB005275	YES	GEOTRACES GA10 JC068 (UK)	8	2012	-39.9992	-9.66801	298	0.947206	0.0438706
Atlantic	Bratkic et al. 2016	Global Biogeochemical cycles	DOI: 10.1002/2015GB005275	YES	GEOTRACES GA10 JC068 (UK)	8	2012	-39.9992	-9.66801	209	3.29029	0.0368912
Atlantic	Bratkic et al. 2016	Global Biogeochemical cycles	DOI: 10.1002/2015GB005275	YES	GEOTRACES GA10 JC068 (UK)	8	2012	-39.9992	-9.66801	198
Atlantic	Bratkic et al. 2016	Global Biogeochemical cycles	DOI: 10.1002/2015GB005275	YES	GEOTRACES GA10 JC068 (UK)	8	2012	-39.9992	-9.66801	149	1.49559	0.0473603
Atlantic	Bratkic et al. 2016	Global Biogeochemical cycles	DOI: 10.1002/2015GB005275	YES	GEOTRACES GA10 JC068 (UK)	8	2012	-39.9992	-9.66801	98	1.34603	0.042375
Atlantic	Bratkic et al. 2016	Global Biogeochemical cycles	DOI: 10.1002/2015GB005275	YES	GEOTRACES GA10 JC068 (UK)	8	2012	-39.9992	-9.66801	74	1.59529	0.0613191
Atlantic	Bratkic et al. 2016	Global Biogeochemical cycles	DOI: 10.1002/2015GB005275	YES	GEOTRACES GA10 JC068 (UK)	8	2012	-39.9992	-9.66801	43	1.29618	0.0752779
Atlantic	Bratkic et al. 2016	Global Biogeochemical cycles	DOI: 10.1002/2015GB005275	YES	GEOTRACES GA10 JC068 (UK)	8	2012	-39.9992	-9.66801	40
Atlantic	Bratkic et al. 2016	Global Biogeochemical cycles	DOI: 10.1002/2015GB005275	YES	GEOTRACES GA10 JC068 (UK)	8	2012	-39.9992	-9.66801	34	1.74485	0.059325
Atlantic	Bratkic et al. 2016	Global Biogeochemical cycles	DOI: 10.1002/2015GB005275	YES	GEOTRACES GA10 JC068 (UK)	8	2012	-39.9992	-9.66801	18	1.49559	0.0628147
Atlantic	Bratkic et al. 2016	Global Biogeochemical cycles	DOI: 10.1002/2015GB005275	YES	GEOTRACES GA10 JC068 (UK)	8	2012	-40.0003	-9.66263	3368	1.89441
Atlantic	Bratkic et al. 2016	Global Biogeochemical cycles	DOI: 10.1002/2015GB005275	YES	GEOTRACES GA10 JC068 (UK)	8	2012	-40.0003	-9.66263	3366
Atlantic	Bratkic et al. 2016	Global Biogeochemical cycles	DOI: 10.1002/2015GB005275	YES	GEOTRACES GA10 JC068 (UK)	8	2012	-40.0003	-9.66263	3196	1.64515
Atlantic	Bratkic et al. 2016	Global Biogeochemical cycles	DOI: 10.1002/2015GB005275	YES	GEOTRACES GA10 JC068 (UK)	8	2012	-40.0003	-9.66263	3196
Atlantic	Bratkic et al. 2016	Global Biogeochemical cycles	DOI: 10.1002/2015GB005275	YES	GEOTRACES GA10 JC068 (UK)	8	2012	-40.0003	-9.66263	2997
Atlantic	Bratkic et al. 2016	Global Biogeochemical cycles	DOI: 10.1002/2015GB005275	YES	GEOTRACES GA10 JC068 (UK)	8	2012	-40.0003	-9.66263	2995	1.84456
Atlantic	Bratkic et al. 2016	Global Biogeochemical cycles	DOI: 10.1002/2015GB005275	YES	GEOTRACES GA10 JC068 (UK)	8	2012	-40.0003	-9.66263	2498
Atlantic	Bratkic et al. 2016	Global Biogeochemical cycles	DOI: 10.1002/2015GB005275	YES	GEOTRACES GA10 JC068 (UK)	8	2012	-40.0003	-9.66263	2497	1.19647
Atlantic	Bratkic et al. 2016	Global Biogeochemical cycles	DOI: 10.1002/2015GB005275	YES	GEOTRACES GA10 JC068 (UK)	8	2012	-40.0003	-9.66263	1997
Atlantic	Bratkic et al. 2016	Global Biogeochemical cycles	DOI: 10.1002/2015GB005275	YES	GEOTRACES GA10 JC068 (UK)	8	2012	-40.0003	-9.66263	1996	1.44574
Atlantic	Bratkic et al. 2016	Global Biogeochemical cycles	DOI: 10.1002/2015GB005275	YES	GEOTRACES GA10 JC068 (UK)	8	2012	-40.0003	-9.66263	1747	2.29323
Atlantic	Bratkic et al. 2016	Global Biogeochemical cycles	DOI: 10.1002/2015GB005275	YES	GEOTRACES GA10 JC068 (UK)	8	2012	-40.0003	-9.66263	1498	0.598235
Atlantic	Bratkic et al. 2016	Global Biogeochemical cycles	DOI: 10.1002/2015GB005275	YES	GEOTRACES GA10 JC068 (UK)	8	2012	-40.0003	-9.66263	1499
Atlantic	Bratkic et al. 2016	Global Biogeochemical cycles	DOI: 10.1002/2015GB005275	YES	GEOTRACES GA10 JC068 (UK)	8	2012	-40.0003	-9.66263	1249	1.39588
Atlantic	Bratkic et al. 2016	Global Biogeochemical cycles	DOI: 10.1002/2015GB005275	YES	GEOTRACES GA10 JC068 (UK)	8	2012	-40.0003	-9.66263	998	0.8475
Atlantic	Bratkic et al. 2016	Global Biogeochemical cycles	DOI: 10.1002/2015GB005275	YES	GEOTRACES GA10 JC068 (UK)	8	2012	-40.0003	-9.66263	701	0.498529
Atlantic	Bratkic et al. 2016	Global Biogeochemical cycles	DOI: 10.1002/2015GB005275	YES	GEOTRACES GA10 JC068 (UK)	8	2012	-40.0003	-9.66263	700
Atlantic	Bratkic et al. 2016	Global Biogeochemical cycles	DOI: 10.1002/2015GB005275	YES	GEOTRACES GA10 JC068 (UK)	8	2012	-40.0003	-9.66263	501	0.598235
Atlantic	Bratkic et al. 2016	Global Biogeochemical cycles	DOI: 10.1002/2015GB005275	YES	GEOTRACES GA10 JC068 (UK)	8	2012	-40.0003	-9.66263	351
Atlantic	Bratkic et al. 2016	Global Biogeochemical cycles	DOI: 10.1002/2015GB005275	YES	GEOTRACES GA10 JC068 (UK)	8	2012	-40.0003	-9.66263	352	1.44574
Atlantic	Bratkic et al. 2016	Global Biogeochemical cycles	DOI: 10.1002/2015GB005275	YES	GEOTRACES GA10 JC068 (UK)	8	2012	-40.0003	-9.66263	202
Atlantic	Bratkic et al. 2016	Global Biogeochemical cycles	DOI: 10.1002/2015GB005275	YES	GEOTRACES GA10 JC068 (UK)	8	2012	-40.0003	-9.66263	102
Atlantic	Bratkic et al. 2016	Global Biogeochemical cycles	DOI: 10.1002/2015GB005275	YES	GEOTRACES GA10 JC068 (UK)	8	2012	-40.0003	-9.66263	52
Atlantic	Bratkic et al. 2016	Global Biogeochemical cycles	DOI: 10.1002/2015GB005275	YES	GEOTRACES GA10 JC068 (UK)	8	2012	-40.0003	-9.66263	7
Atlantic	Bratkic et al. 2016	Global Biogeochemical cycles	DOI: 10.1002/2015GB005275	YES	GEOTRACES GA10 JC068 (UK)	9	2012	-40.2573	-9.8531	998	1.29618
Atlantic	Bratkic et al. 2016	Global Biogeochemical cycles	DOI: 10.1002/2015GB005275	YES	GEOTRACES GA10 JC068 (UK)	9	2012	-40.2573	-9.8531	998
Atlantic	Bratkic et al. 2016	Global Biogeochemical cycles	DOI: 10.1002/2015GB005275	YES	GEOTRACES GA10 JC068 (UK)	9	2012	-40.2573	-9.8531	699	1.59529
Atlantic	Bratkic et al. 2016	Global Biogeochemical cycles	DOI: 10.1002/2015GB005275	YES	GEOTRACES GA10 JC068 (UK)	9	2012	-40.2573	-9.8531	699
Atlantic	Bratkic et al. 2016	Global Biogeochemical cycles	DOI: 10.1002/2015GB005275	YES	GEOTRACES GA10 JC068 (UK)	9	2012	-40.2573	-9.8531	500	1.09676
Atlantic	Bratkic et al. 2016	Global Biogeochemical cycles	DOI: 10.1002/2015GB005275	YES	GEOTRACES GA10 JC068 (UK)	9	2012	-40.2573	-9.8531	501
Atlantic	Bratkic et al. 2016	Global Biogeochemical cycles	DOI: 10.1002/2015GB005275	YES	GEOTRACES GA10 JC068 (UK)	9	2012	-40.2573	-9.8531	351	1.695
Atlantic	Bratkic et al. 2016	Global Biogeochemical cycles	DOI: 10.1002/2015GB005275	YES	GEOTRACES GA10 JC068 (UK)	9	2012	-40.2573	-9.8531	350
Atlantic	Bratkic et al. 2016	Global Biogeochemical cycles	DOI: 10.1002/2015GB005275	YES	GEOTRACES GA10 JC068 (UK)	9	2012	-40.2573	-9.8531	202	0.398823
Atlantic	Bratkic et al. 2016	Global Biogeochemical cycles	DOI: 10.1002/2015GB005275	YES	GEOTRACES GA10 JC068 (UK)	9	2012	-40.2573	-9.8531	201
Atlantic	Bratkic et al. 2016	Global Biogeochemical cycles	DOI: 10.1002/2015GB005275	YES	GEOTRACES GA10 JC068 (UK)	9	2012	-40.2573	-9.8531	103	1.34603
Atlantic	Bratkic et al. 2016	Global Biogeochemical cycles	DOI: 10.1002/2015GB005275	YES	GEOTRACES GA10 JC068 (UK)	9	2012	-40.2573	-9.8531	102
Atlantic	Bratkic et al. 2016	Global Biogeochemical cycles	DOI: 10.1002/2015GB005275	YES	GEOTRACES GA10 JC068 (UK)	9	2012	-40.2573	-9.8531	80
Atlantic	Bratkic et al. 2016	Global Biogeochemical cycles	DOI: 10.1002/2015GB005275	YES	GEOTRACES GA10 JC068 (UK)	9	2012	-40.2573	-9.8531	71
Atlantic	Bratkic et al. 2016	Global Biogeochemical cycles	DOI: 10.1002/2015GB005275	YES	GEOTRACES GA10 JC068 (UK)	9	2012	-40.2573	-9.8531	61	1.04691
Atlantic	Bratkic et al. 2016	Global Biogeochemical cycles	DOI: 10.1002/2015GB005275	YES	GEOTRACES GA10 JC068 (UK)	9	2012	-40.2573	-9.8531	61
Atlantic	Bratkic et al. 2016	Global Biogeochemical cycles	DOI: 10.1002/2015GB005275	YES	GEOTRACES GA10 JC068 (UK)	9	2012	-40.2573	-9.8531	51
Atlantic	Bratkic et al. 2016	Global Biogeochemical cycles	DOI: 10.1002/2015GB005275	YES	GEOTRACES GA10 JC068 (UK)	9	2012	-40.2573	-9.8531	51	0.747794
Atlantic	Bratkic et al. 2016	Global Biogeochemical cycles	DOI: 10.1002/2015GB005275	YES	GEOTRACES GA10 JC068 (UK)	9	2012	-40.2573	-9.8531	36	0.897353
Atlantic	Bratkic et al. 2016	Global Biogeochemical cycles	DOI: 10.1002/2015GB005275	YES	GEOTRACES GA10 JC068 (UK)	9	2012	-40.2573	-9.8531	36
Atlantic	Bratkic et al. 2016	Global Biogeochemical cycles	DOI: 10.1002/2015GB005275	YES	GEOTRACES GA10 JC068 (UK)	9	2012	-40.2573	-9.8531	21
Atlantic	Bratkic et al. 2016	Global Biogeochemical cycles	DOI: 10.1002/2015GB005275	YES	GEOTRACES GA10 JC068 (UK)	9	2012	-40.2573	-9.8531	22	0.598235
Atlantic	Bratkic et al. 2016	Global Biogeochemical cycles	DOI: 10.1002/2015GB005275	YES	GEOTRACES GA10 JC068 (UK)	9	2012	-40.2573	-9.8531	7	0.648088
Atlantic	Bratkic et al. 2016	Global Biogeochemical cycles	DOI: 10.1002/2015GB005275	YES	GEOTRACES GA10 JC068 (UK)	9	2012	-40.2573	-9.8531	7
Atlantic	Bratkic et al. 2016	Global Biogeochemical cycles	DOI: 10.1002/2015GB005275	YES	GEOTRACES GA10 JC068 (UK)	9	2012	-40.2576	-9.85481	1001
Atlantic	Bratkic et al. 2016	Global Biogeochemical cycles	DOI: 10.1002/2015GB005275	YES	GEOTRACES GA10 JC068 (UK)	9	2012	-40.2576	-9.85481	895
Atlantic	Bratkic et al. 2016	Global Biogeochemical cycles	DOI: 10.1002/2015GB005275	YES	GEOTRACES GA10 JC068 (UK)	9	2012	-40.2576	-9.85481	697
Atlantic	Bratkic et al. 2016	Global Biogeochemical cycles	DOI: 10.1002/2015GB005275	YES	GEOTRACES GA10 JC068 (UK)	9	2012	-40.2576	-9.85481	497
Atlantic	Bratkic et al. 2016	Global Biogeochemical cycles	DOI: 10.1002/2015GB005275	YES	GEOTRACES GA10 JC068 (UK)	9	2012	-40.2576	-9.85481	398
Atlantic	Bratkic et al. 2016	Global Biogeochemical cycles	DOI: 10.1002/2015GB005275	YES	GEOTRACES GA10 JC068 (UK)	9	2012	-40.2576	-9.85481	298
Atlantic	Bratkic et al. 2016	Global Biogeochemical cycles	DOI: 10.1002/2015GB005275	YES	GEOTRACES GA10 JC068 (UK)	9	2012	-40.2576	-9.85481	199
Atlantic	Bratkic et al. 2016	Global Biogeochemical cycles	DOI: 10.1002/2015GB005275	YES	GEOTRACES GA10 JC068 (UK)	9	2012	-40.2576	-9.85481	148
Atlantic	Bratkic et al. 2016	Global Biogeochemical cycles	DOI: 10.1002/2015GB005275	YES	GEOTRACES GA10 JC068 (UK)	9	2012	-40.2576	-9.85481	99
Atlantic	Bratkic et al. 2016	Global Biogeochemical cycles	DOI: 10.1002/2015GB005275	YES	GEOTRACES GA10 JC068 (UK)	9	2012	-40.2576	-9.85481	79
Atlantic	Bratkic et al. 2016	Global Biogeochemical cycles	DOI: 10.1002/2015GB005275	YES	GEOTRACES GA10 JC068 (UK)	9	2012	-40.2576	-9.85481	59
Atlantic	Bratkic et al. 2016	Global Biogeochemical cycles	DOI: 10.1002/2015GB005275	YES	GEOTRACES GA10 JC068 (UK)	9	2012	-40.2576	-9.85481	49
Atlantic	Bratkic et al. 2016	Global Biogeochemical cycles	DOI: 10.1002/2015GB005275	YES	GEOTRACES GA10 JC068 (UK)	9	2012	-40.2576	-9.85481	34
Atlantic	Bratkic et al. 2016	Global Biogeochemical cycles	DOI: 10.1002/2015GB005275	YES	GEOTRACES GA10 JC068 (UK)	9	2012	-40.2576	-9.85481	19
Atlantic	Bratkic et al. 2016	Global Biogeochemical cycles	DOI: 10.1002/2015GB005275	YES	GEOTRACES GA10 JC068 (UK)	11	2012	-39.9983	-13.0001	398
Atlantic	Bratkic et al. 2016	Global Biogeochemical cycles	DOI: 10.1002/2015GB005275	YES	GEOTRACES GA10 JC068 (UK)	11	2012	-39.9983	-13.0001	397	1.04691
Atlantic	Bratkic et al. 2016	Global Biogeochemical cycles	DOI: 10.1002/2015GB005275	YES	GEOTRACES GA10 JC068 (UK)	11	2012	-39.9983	-13.0001	299	0.697941
Atlantic	Bratkic et al. 2016	Global Biogeochemical cycles	DOI: 10.1002/2015GB005275	YES	GEOTRACES GA10 JC068 (UK)	11	2012	-39.9983	-13.0001	199
Atlantic	Bratkic et al. 2016	Global Biogeochemical cycles	DOI: 10.1002/2015GB005275	YES	GEOTRACES GA10 JC068 (UK)	11	2012	-39.9983	-13.0001	199	0.747794
Atlantic	Bratkic et al. 2016	Global Biogeochemical cycles	DOI: 10.1002/2015GB005275	YES	GEOTRACES GA10 JC068 (UK)	11	2012	-39.9983	-13.0001	120	1.34603
Atlantic	Bratkic et al. 2016	Global Biogeochemical cycles	DOI: 10.1002/2015GB005275	YES	GEOTRACES GA10 JC068 (UK)	11	2012	-39.9983	-13.0001	100
Atlantic	Bratkic et al. 2016	Global Biogeochemical cycles	DOI: 10.1002/2015GB005275	YES	GEOTRACES GA10 JC068 (UK)	11	2012	-39.9983	-13.0001	101	0.747794
Atlantic	Bratkic et al. 2016	Global Biogeochemical cycles	DOI: 10.1002/2015GB005275	YES	GEOTRACES GA10 JC068 (UK)	11	2012	-39.9983	-13.0001	80
Atlantic	Bratkic et al. 2016	Global Biogeochemical cycles	DOI: 10.1002/2015GB005275	YES	GEOTRACES GA10 JC068 (UK)	11	2012	-39.9983	-13.0001	79	0.548382
Atlantic	Bratkic et al. 2016	Global Biogeochemical cycles	DOI: 10.1002/2015GB005275	YES	GEOTRACES GA10 JC068 (UK)	11	2012	-39.9983	-13.0001	70
Atlantic	Bratkic et al. 2016	Global Biogeochemical cycles	DOI: 10.1002/2015GB005275	YES	GEOTRACES GA10 JC068 (UK)	11	2012	-39.9983	-13.0001	69	0.598235
Atlantic	Bratkic et al. 2016	Global Biogeochemical cycles	DOI: 10.1002/2015GB005275	YES	GEOTRACES GA10 JC068 (UK)	11	2012	-39.9983	-13.0001	60
Atlantic	Bratkic et al. 2016	Global Biogeochemical cycles	DOI: 10.1002/2015GB005275	YES	GEOTRACES GA10 JC068 (UK)	11	2012	-39.9983	-13.0001	60	0.747794
Atlantic	Bratkic et al. 2016	Global Biogeochemical cycles	DOI: 10.1002/2015GB005275	YES	GEOTRACES GA10 JC068 (UK)	11	2012	-40	-12.9988	3163
Atlantic	Bratkic et al. 2016	Global Biogeochemical cycles	DOI: 10.1002/2015GB005275	YES	GEOTRACES GA10 JC068 (UK)	11	2012	-40	-12.9988	3090
Atlantic	Bratkic et al. 2016	Global Biogeochemical cycles	DOI: 10.1002/2015GB005275	YES	GEOTRACES GA10 JC068 (UK)	11	2012	-40	-12.9988	2992
Atlantic	Bratkic et al. 2016	Global Biogeochemical cycles	DOI: 10.1002/2015GB005275	YES	GEOTRACES GA10 JC068 (UK)	11	2012	-40	-12.9988	2891
Atlantic	Bratkic et al. 2016	Global Biogeochemical cycles	DOI: 10.1002/2015GB005275	YES	GEOTRACES GA10 JC068 (UK)	11	2012	-40	-12.9988	2689
Atlantic	Bratkic et al. 2016	Global Biogeochemical cycles	DOI: 10.1002/2015GB005275	YES	GEOTRACES GA10 JC068 (UK)	11	2012	-40	-12.9988	2491
Atlantic	Bratkic et al. 2016	Global Biogeochemical cycles	DOI: 10.1002/2015GB005275	YES	GEOTRACES GA10 JC068 (UK)	11	2012	-40	-12.9988	2193
Atlantic	Bratkic et al. 2016	Global Biogeochemical cycles	DOI: 10.1002/2015GB005275	YES	GEOTRACES GA10 JC068 (UK)	11	2012	-40	-12.9988	1993
Atlantic	Bratkic et al. 2016	Global Biogeochemical cycles	DOI: 10.1002/2015GB005275	YES	GEOTRACES GA10 JC068 (UK)	11	2012	-40	-12.9988	1794
Atlantic	Bratkic et al. 2016	Global Biogeochemical cycles	DOI: 10.1002/2015GB005275	YES	GEOTRACES GA10 JC068 (UK)	11	2012	-40	-12.9988	1644
Atlantic	Bratkic et al. 2016	Global Biogeochemical cycles	DOI: 10.1002/2015GB005275	YES	GEOTRACES GA10 JC068 (UK)	11	2012	-40	-12.9988	1494
Atlantic	Bratkic et al. 2016	Global Biogeochemical cycles	DOI: 10.1002/2015GB005275	YES	GEOTRACES GA10 JC068 (UK)	11	2012	-40	-12.9988	1245
Atlantic	Bratkic et al. 2016	Global Biogeochemical cycles	DOI: 10.1002/2015GB005275	YES	GEOTRACES GA10 JC068 (UK)	11	2012	-40	-12.9988	997
Atlantic	Bratkic et al. 2016	Global Biogeochemical cycles	DOI: 10.1002/2015GB005275	YES	GEOTRACES GA10 JC068 (UK)	11	2012	-40	-12.9988	747
Atlantic	Bratkic et al. 2016	Global Biogeochemical cycles	DOI: 10.1002/2015GB005275	YES	GEOTRACES GA10 JC068 (UK)	11	2012	-40	-12.9988	497
Atlantic	Bratkic et al. 2016	Global Biogeochemical cycles	DOI: 10.1002/2015GB005275	YES	GEOTRACES GA10 JC068 (UK)	11	2012	-40	-12.9988	399
Atlantic	Bratkic et al. 2016	Global Biogeochemical cycles	DOI: 10.1002/2015GB005275	YES	GEOTRACES GA10 JC068 (UK)	11	2012	-40	-12.9988	297
Atlantic	Bratkic et al. 2016	Global Biogeochemical cycles	DOI: 10.1002/2015GB005275	YES	GEOTRACES GA10 JC068 (UK)	11	2012	-40	-12.9988	199
Atlantic	Bratkic et al. 2016	Global Biogeochemical cycles	DOI: 10.1002/2015GB005275	YES	GEOTRACES GA10 JC068 (UK)	11	2012	-40	-12.9988	148
Atlantic	Bratkic et al. 2016	Global Biogeochemical cycles	DOI: 10.1002/2015GB005275	YES	GEOTRACES GA10 JC068 (UK)	11	2012	-40	-12.9988	100
Atlantic	Bratkic et al. 2016	Global Biogeochemical cycles	DOI: 10.1002/2015GB005275	YES	GEOTRACES GA10 JC068 (UK)	11	2012	-40	-12.9988	74
Atlantic	Bratkic et al. 2016	Global Biogeochemical cycles	DOI: 10.1002/2015GB005275	YES	GEOTRACES GA10 JC068 (UK)	11	2012	-40	-12.9988	58
Atlantic	Bratkic et al. 2016	Global Biogeochemical cycles	DOI: 10.1002/2015GB005275	YES	GEOTRACES GA10 JC068 (UK)	11	2012	-40	-12.9988	30
Atlantic	Bratkic et al. 2016	Global Biogeochemical cycles	DOI: 10.1002/2015GB005275	YES	GEOTRACES GA10 JC068 (UK)	11	2012	-40	-12.9988	17
Atlantic	Bratkic et al. 2016	Global Biogeochemical cycles	DOI: 10.1002/2015GB005275	YES	GEOTRACES GA10 JC068 (UK)	11	2012	-40	-13.0001	3158
Atlantic	Bratkic et al. 2016	Global Biogeochemical cycles	DOI: 10.1002/2015GB005275	YES	GEOTRACES GA10 JC068 (UK)	11	2012	-40	-13.0001	3160
Atlantic	Bratkic et al. 2016	Global Biogeochemical cycles	DOI: 10.1002/2015GB005275	YES	GEOTRACES GA10 JC068 (UK)	11	2012	-40	-13.0001	3094	1.24632
Atlantic	Bratkic et al. 2016	Global Biogeochemical cycles	DOI: 10.1002/2015GB005275	YES	GEOTRACES GA10 JC068 (UK)	11	2012	-40	-13.0001	2996	1.34603
Atlantic	Bratkic et al. 2016	Global Biogeochemical cycles	DOI: 10.1002/2015GB005275	YES	GEOTRACES GA10 JC068 (UK)	11	2012	-40	-13.0001	2693
Atlantic	Bratkic et al. 2016	Global Biogeochemical cycles	DOI: 10.1002/2015GB005275	YES	GEOTRACES GA10 JC068 (UK)	11	2012	-40	-13.0001	2494	0.997059
Atlantic	Bratkic et al. 2016	Global Biogeochemical cycles	DOI: 10.1002/2015GB005275	YES	GEOTRACES GA10 JC068 (UK)	11	2012	-40	-13.0001	2197
Atlantic	Bratkic et al. 2016	Global Biogeochemical cycles	DOI: 10.1002/2015GB005275	YES	GEOTRACES GA10 JC068 (UK)	11	2012	-40	-13.0001	1995
Atlantic	Bratkic et al. 2016	Global Biogeochemical cycles	DOI: 10.1002/2015GB005275	YES	GEOTRACES GA10 JC068 (UK)	11	2012	-40	-13.0001	1797
Atlantic	Bratkic et al. 2016	Global Biogeochemical cycles	DOI: 10.1002/2015GB005275	YES	GEOTRACES GA10 JC068 (UK)	11	2012	-40	-13.0001	1497
Atlantic	Bratkic et al. 2016	Global Biogeochemical cycles	DOI: 10.1002/2015GB005275	YES	GEOTRACES GA10 JC068 (UK)	11	2012	-40	-13.0001	1248
Atlantic	Bratkic et al. 2016	Global Biogeochemical cycles	DOI: 10.1002/2015GB005275	YES	GEOTRACES GA10 JC068 (UK)	11	2012	-40	-13.0001	998
Atlantic	Bratkic et al. 2016	Global Biogeochemical cycles	DOI: 10.1002/2015GB005275	YES	GEOTRACES GA10 JC068 (UK)	11	2012	-40	-13.0001	749
Atlantic	Bratkic et al. 2016	Global Biogeochemical cycles	DOI: 10.1002/2015GB005275	YES	GEOTRACES GA10 JC068 (UK)	11	2012	-40	-13.0001	500
Atlantic	Bratkic et al. 2016	Global Biogeochemical cycles	DOI: 10.1002/2015GB005275	YES	GEOTRACES GA10 JC068 (UK)	11	2012	-40	-13.0001	200
Atlantic	Bratkic et al. 2016	Global Biogeochemical cycles	DOI: 10.1002/2015GB005275	YES	GEOTRACES GA10 JC068 (UK)	11	2012	-40	-13.0001	100
Atlantic	Bratkic et al. 2016	Global Biogeochemical cycles	DOI: 10.1002/2015GB005275	YES	GEOTRACES GA10 JC068 (UK)	11	2012	-40	-13.0001	82
Atlantic	Bratkic et al. 2016	Global Biogeochemical cycles	DOI: 10.1002/2015GB005275	YES	GEOTRACES GA10 JC068 (UK)	11	2012	-40	-13.0001	71
Atlantic	Bratkic et al. 2016	Global Biogeochemical cycles	DOI: 10.1002/2015GB005275	YES	GEOTRACES GA10 JC068 (UK)	11	2012	-40	-13.0001	62
Atlantic	Bratkic et al. 2016	Global Biogeochemical cycles	DOI: 10.1002/2015GB005275	YES	GEOTRACES GA10 JC068 (UK)	11	2012	-40	-13.0001	51
Atlantic	Bratkic et al. 2016	Global Biogeochemical cycles	DOI: 10.1002/2015GB005275	YES	GEOTRACES GA10 JC068 (UK)	11	2012	-40	-13.0001	36
Atlantic	Bratkic et al. 2016	Global Biogeochemical cycles	DOI: 10.1002/2015GB005275	YES	GEOTRACES GA10 JC068 (UK)	11	2012	-40	-13.0001	36	0.598235
Atlantic	Bratkic et al. 2016	Global Biogeochemical cycles	DOI: 10.1002/2015GB005275	YES	GEOTRACES GA10 JC068 (UK)	11	2012	-40	-13.0001	21
Atlantic	Bratkic et al. 2016	Global Biogeochemical cycles	DOI: 10.1002/2015GB005275	YES	GEOTRACES GA10 JC068 (UK)	11	2012	-40	-13.0001	6
Atlantic	Bratkic et al. 2016	Global Biogeochemical cycles	DOI: 10.1002/2015GB005275	YES	GEOTRACES GA10 JC068 (UK)	11	2012	-40	-12.9999	2193
Atlantic	Bratkic et al. 2016	Global Biogeochemical cycles	DOI: 10.1002/2015GB005275	YES	GEOTRACES GA10 JC068 (UK)	11	2012	-40	-12.9999	2194	1.39588
Atlantic	Bratkic et al. 2016	Global Biogeochemical cycles	DOI: 10.1002/2015GB005275	YES	GEOTRACES GA10 JC068 (UK)	11	2012	-40	-12.9999	2194
Atlantic	Bratkic et al. 2016	Global Biogeochemical cycles	DOI: 10.1002/2015GB005275	YES	GEOTRACES GA10 JC068 (UK)	11	2012	-40	-12.9999	1994	1.34603
Atlantic	Bratkic et al. 2016	Global Biogeochemical cycles	DOI: 10.1002/2015GB005275	YES	GEOTRACES GA10 JC068 (UK)	11	2012	-40	-12.9999	1994
Atlantic	Bratkic et al. 2016	Global Biogeochemical cycles	DOI: 10.1002/2015GB005275	YES	GEOTRACES GA10 JC068 (UK)	11	2012	-40	-12.9999	1994
Atlantic	Bratkic et al. 2016	Global Biogeochemical cycles	DOI: 10.1002/2015GB005275	YES	GEOTRACES GA10 JC068 (UK)	11	2012	-40	-12.9999	1794
Atlantic	Bratkic et al. 2016	Global Biogeochemical cycles	DOI: 10.1002/2015GB005275	YES	GEOTRACES GA10 JC068 (UK)	11	2012	-40	-12.9999	1795	0.897353
Atlantic	Bratkic et al. 2016	Global Biogeochemical cycles	DOI: 10.1002/2015GB005275	YES	GEOTRACES GA10 JC068 (UK)	11	2012	-40	-12.9999	1795
Atlantic	Bratkic et al. 2016	Global Biogeochemical cycles	DOI: 10.1002/2015GB005275	YES	GEOTRACES GA10 JC068 (UK)	11	2012	-40	-12.9999	1497	1.04691
Atlantic	Bratkic et al. 2016	Global Biogeochemical cycles	DOI: 10.1002/2015GB005275	YES	GEOTRACES GA10 JC068 (UK)	11	2012	-40	-12.9999	1495
Atlantic	Bratkic et al. 2016	Global Biogeochemical cycles	DOI: 10.1002/2015GB005275	YES	GEOTRACES GA10 JC068 (UK)	11	2012	-40	-12.9999	1494
Atlantic	Bratkic et al. 2016	Global Biogeochemical cycles	DOI: 10.1002/2015GB005275	YES	GEOTRACES GA10 JC068 (UK)	11	2012	-40	-12.9999	1246
Atlantic	Bratkic et al. 2016	Global Biogeochemical cycles	DOI: 10.1002/2015GB005275	YES	GEOTRACES GA10 JC068 (UK)	11	2012	-40	-12.9999	1245	1.04691
Atlantic	Bratkic et al. 2016	Global Biogeochemical cycles	DOI: 10.1002/2015GB005275	YES	GEOTRACES GA10 JC068 (UK)	11	2012	-40	-12.9999	1244
Atlantic	Bratkic et al. 2016	Global Biogeochemical cycles	DOI: 10.1002/2015GB005275	YES	GEOTRACES GA10 JC068 (UK)	11	2012	-40	-12.9999	996	0.997059
Atlantic	Bratkic et al. 2016	Global Biogeochemical cycles	DOI: 10.1002/2015GB005275	YES	GEOTRACES GA10 JC068 (UK)	11	2012	-40	-12.9999	997
Atlantic	Bratkic et al. 2016	Global Biogeochemical cycles	DOI: 10.1002/2015GB005275	YES	GEOTRACES GA10 JC068 (UK)	11	2012	-40	-12.9999	996
Atlantic	Bratkic et al. 2016	Global Biogeochemical cycles	DOI: 10.1002/2015GB005275	YES	GEOTRACES GA10 JC068 (UK)	11	2012	-40	-12.9999	747
Atlantic	Bratkic et al. 2016	Global Biogeochemical cycles	DOI: 10.1002/2015GB005275	YES	GEOTRACES GA10 JC068 (UK)	11	2012	-40	-12.9999	748
Atlantic	Bratkic et al. 2016	Global Biogeochemical cycles	DOI: 10.1002/2015GB005275	YES	GEOTRACES GA10 JC068 (UK)	11	2012	-40	-12.9999	748
Atlantic	Bratkic et al. 2016	Global Biogeochemical cycles	DOI: 10.1002/2015GB005275	YES	GEOTRACES GA10 JC068 (UK)	11	2012	-40	-12.9999	497
Atlantic	Bratkic et al. 2016	Global Biogeochemical cycles	DOI: 10.1002/2015GB005275	YES	GEOTRACES GA10 JC068 (UK)	11	2012	-40	-12.9999	497	0.797647
Atlantic	Bratkic et al. 2016	Global Biogeochemical cycles	DOI: 10.1002/2015GB005275	YES	GEOTRACES GA10 JC068 (UK)	11	2012	-40	-12.9999	497
Atlantic	Bratkic et al. 2016	Global Biogeochemical cycles	DOI: 10.1002/2015GB005275	YES	GEOTRACES GA10 JC068 (UK)	12	2012	-40.0007	-16.4661	3105
Atlantic	Bratkic et al. 2016	Global Biogeochemical cycles	DOI: 10.1002/2015GB005275	YES	GEOTRACES GA10 JC068 (UK)	12	2012	-40.0007	-16.4661	3105	1.54544
Atlantic	Bratkic et al. 2016	Global Biogeochemical cycles	DOI: 10.1002/2015GB005275	YES	GEOTRACES GA10 JC068 (UK)	12	2012	-40.0007	-16.4661	2992
Atlantic	Bratkic et al. 2016	Global Biogeochemical cycles	DOI: 10.1002/2015GB005275	YES	GEOTRACES GA10 JC068 (UK)	12	2012	-40.0007	-16.4661	2990
Atlantic	Bratkic et al. 2016	Global Biogeochemical cycles	DOI: 10.1002/2015GB005275	YES	GEOTRACES GA10 JC068 (UK)	12	2012	-40.0007	-16.4661	2740
Atlantic	Bratkic et al. 2016	Global Biogeochemical cycles	DOI: 10.1002/2015GB005275	YES	GEOTRACES GA10 JC068 (UK)	12	2012	-40.0007	-16.4661	2491	1.59529
Atlantic	Bratkic et al. 2016	Global Biogeochemical cycles	DOI: 10.1002/2015GB005275	YES	GEOTRACES GA10 JC068 (UK)	12	2012	-40.0007	-16.4661	2490
Atlantic	Bratkic et al. 2016	Global Biogeochemical cycles	DOI: 10.1002/2015GB005275	YES	GEOTRACES GA10 JC068 (UK)	12	2012	-40.0007	-16.4661	2190
Atlantic	Bratkic et al. 2016	Global Biogeochemical cycles	DOI: 10.1002/2015GB005275	YES	GEOTRACES GA10 JC068 (UK)	12	2012	-40.0007	-16.4661	1991	1.49559
Atlantic	Bratkic et al. 2016	Global Biogeochemical cycles	DOI: 10.1002/2015GB005275	YES	GEOTRACES GA10 JC068 (UK)	12	2012	-40.0007	-16.4661	1990
Atlantic	Bratkic et al. 2016	Global Biogeochemical cycles	DOI: 10.1002/2015GB005275	YES	GEOTRACES GA10 JC068 (UK)	12	2012	-40.0007	-16.4661	1791	1.79471
Atlantic	Bratkic et al. 2016	Global Biogeochemical cycles	DOI: 10.1002/2015GB005275	YES	GEOTRACES GA10 JC068 (UK)	12	2012	-40.0007	-16.4661	1592	1.19647
Atlantic	Bratkic et al. 2016	Global Biogeochemical cycles	DOI: 10.1002/2015GB005275	YES	GEOTRACES GA10 JC068 (UK)	12	2012	-40.0007	-16.4661	1491
Atlantic	Bratkic et al. 2016	Global Biogeochemical cycles	DOI: 10.1002/2015GB005275	YES	GEOTRACES GA10 JC068 (UK)	12	2012	-40.0007	-16.4661	1307	1.34603
Atlantic	Bratkic et al. 2016	Global Biogeochemical cycles	DOI: 10.1002/2015GB005275	YES	GEOTRACES GA10 JC068 (UK)	12	2012	-40.0007	-16.4661	1193	1.19647
Atlantic	Bratkic et al. 2016	Global Biogeochemical cycles	DOI: 10.1002/2015GB005275	YES	GEOTRACES GA10 JC068 (UK)	12	2012	-40.0007	-16.4661	992	1.04691
Atlantic	Bratkic et al. 2016	Global Biogeochemical cycles	DOI: 10.1002/2015GB005275	YES	GEOTRACES GA10 JC068 (UK)	12	2012	-40.0007	-16.4661	743	0.8475
Atlantic	Bratkic et al. 2016	Global Biogeochemical cycles	DOI: 10.1002/2015GB005275	YES	GEOTRACES GA10 JC068 (UK)	12	2012	-40.0007	-16.4661	594	0.747794
Atlantic	Bratkic et al. 2016	Global Biogeochemical cycles	DOI: 10.1002/2015GB005275	YES	GEOTRACES GA10 JC068 (UK)	12	2012	-40.0007	-16.4661	495
Atlantic	Bratkic et al. 2016	Global Biogeochemical cycles	DOI: 10.1002/2015GB005275	YES	GEOTRACES GA10 JC068 (UK)	12	2012	-40.0007	-16.4661	195
Atlantic	Bratkic et al. 2016	Global Biogeochemical cycles	DOI: 10.1002/2015GB005275	YES	GEOTRACES GA10 JC068 (UK)	12	2012	-40.0007	-16.4661	96
Atlantic	Bratkic et al. 2016	Global Biogeochemical cycles	DOI: 10.1002/2015GB005275	YES	GEOTRACES GA10 JC068 (UK)	12	2012	-40.0007	-16.4661	47
Atlantic	Bratkic et al. 2016	Global Biogeochemical cycles	DOI: 10.1002/2015GB005275	YES	GEOTRACES GA10 JC068 (UK)	12	2012	-40.0007	-16.4661	16
Atlantic	Bratkic et al. 2016	Global Biogeochemical cycles	DOI: 10.1002/2015GB005275	YES	GEOTRACES GA10 JC068 (UK)	12	2012	-40.0007	-16.4661	2
Atlantic	Bratkic et al. 2016	Global Biogeochemical cycles	DOI: 10.1002/2015GB005275	YES	GEOTRACES GA10 JC068 (UK)	12	2012	-40.0022	-16.4634	3041	0.897353
Atlantic	Bratkic et al. 2016	Global Biogeochemical cycles	DOI: 10.1002/2015GB005275	YES	GEOTRACES GA10 JC068 (UK)	12	2012	-40.0022	-16.4634	3031	0.8475	0.0498529
Atlantic	Bratkic et al. 2016	Global Biogeochemical cycles	DOI: 10.1002/2015GB005275	YES	GEOTRACES GA10 JC068 (UK)	12	2012	-40.0022	-16.4634	2991	1.19647	0.0553368
Atlantic	Bratkic et al. 2016	Global Biogeochemical cycles	DOI: 10.1002/2015GB005275	YES	GEOTRACES GA10 JC068 (UK)	12	2012	-40.0022	-16.4634	2988
Atlantic	Bratkic et al. 2016	Global Biogeochemical cycles	DOI: 10.1002/2015GB005275	YES	GEOTRACES GA10 JC068 (UK)	12	2012	-40.0022	-16.4634	2983
Atlantic	Bratkic et al. 2016	Global Biogeochemical cycles	DOI: 10.1002/2015GB005275	YES	GEOTRACES GA10 JC068 (UK)	12	2012	-40.0022	-16.4634	2741
Atlantic	Bratkic et al. 2016	Global Biogeochemical cycles	DOI: 10.1002/2015GB005275	YES	GEOTRACES GA10 JC068 (UK)	12	2012	-40.0022	-16.4634	2493	1.39588	0.05085
Atlantic	Bratkic et al. 2016	Global Biogeochemical cycles	DOI: 10.1002/2015GB005275	YES	GEOTRACES GA10 JC068 (UK)	12	2012	-40.0022	-16.4634	2487
Atlantic	Bratkic et al. 2016	Global Biogeochemical cycles	DOI: 10.1002/2015GB005275	YES	GEOTRACES GA10 JC068 (UK)	12	2012	-40.0022	-16.4634	2192
Atlantic	Bratkic et al. 2016	Global Biogeochemical cycles	DOI: 10.1002/2015GB005275	YES	GEOTRACES GA10 JC068 (UK)	12	2012	-40.0022	-16.4634	1993	1.99412	0.0418765
Atlantic	Bratkic et al. 2016	Global Biogeochemical cycles	DOI: 10.1002/2015GB005275	YES	GEOTRACES GA10 JC068 (UK)	12	2012	-40.0022	-16.4634	1987
Atlantic	Bratkic et al. 2016	Global Biogeochemical cycles	DOI: 10.1002/2015GB005275	YES	GEOTRACES GA10 JC068 (UK)	12	2012	-40.0022	-16.4634	1793	0.997059	0.0523456
Atlantic	Bratkic et al. 2016	Global Biogeochemical cycles	DOI: 10.1002/2015GB005275	YES	GEOTRACES GA10 JC068 (UK)	12	2012	-40.0022	-16.4634	1594	1.79471	0.0378882
Atlantic	Bratkic et al. 2016	Global Biogeochemical cycles	DOI: 10.1002/2015GB005275	YES	GEOTRACES GA10 JC068 (UK)	12	2012	-40.0022	-16.4634	1494
Atlantic	Bratkic et al. 2016	Global Biogeochemical cycles	DOI: 10.1002/2015GB005275	YES	GEOTRACES GA10 JC068 (UK)	12	2012	-40.0022	-16.4634	1488
Atlantic	Bratkic et al. 2016	Global Biogeochemical cycles	DOI: 10.1002/2015GB005275	YES	GEOTRACES GA10 JC068 (UK)	12	2012	-40.0022	-16.4634	1394	1.29618	0.0478588
Atlantic	Bratkic et al. 2016	Global Biogeochemical cycles	DOI: 10.1002/2015GB005275	YES	GEOTRACES GA10 JC068 (UK)	12	2012	-40.0022	-16.4634	1195	1.14662	0.0463632
Atlantic	Bratkic et al. 2016	Global Biogeochemical cycles	DOI: 10.1002/2015GB005275	YES	GEOTRACES GA10 JC068 (UK)	12	2012	-40.0022	-16.4634	997	0.947206	0.0269206
Atlantic	Bratkic et al. 2016	Global Biogeochemical cycles	DOI: 10.1002/2015GB005275	YES	GEOTRACES GA10 JC068 (UK)	12	2012	-40.0022	-16.4634	990
Atlantic	Bratkic et al. 2016	Global Biogeochemical cycles	DOI: 10.1002/2015GB005275	YES	GEOTRACES GA10 JC068 (UK)	12	2012	-40.0022	-16.4634	747	0.997059	0.0299118
Atlantic	Bratkic et al. 2016	Global Biogeochemical cycles	DOI: 10.1002/2015GB005275	YES	GEOTRACES GA10 JC068 (UK)	12	2012	-40.0022	-16.4634	597	1.54544	0.0304103
Atlantic	Bratkic et al. 2016	Global Biogeochemical cycles	DOI: 10.1002/2015GB005275	YES	GEOTRACES GA10 JC068 (UK)	12	2012	-40.0022	-16.4634	497
Atlantic	Bratkic et al. 2016	Global Biogeochemical cycles	DOI: 10.1002/2015GB005275	YES	GEOTRACES GA10 JC068 (UK)	12	2012	-40.0022	-16.4634	492
Atlantic	Bratkic et al. 2016	Global Biogeochemical cycles	DOI: 10.1002/2015GB005275	YES	GEOTRACES GA10 JC068 (UK)	12	2012	-40.0022	-16.4634	488
Atlantic	Bratkic et al. 2016	Global Biogeochemical cycles	DOI: 10.1002/2015GB005275	YES	GEOTRACES GA10 JC068 (UK)	12	2012	-40.0017	-16.4651	393	1.19647
Atlantic	Bratkic et al. 2016	Global Biogeochemical cycles	DOI: 10.1002/2015GB005275	YES	GEOTRACES GA10 JC068 (UK)	12	2012	-40.0017	-16.4651	394
Atlantic	Bratkic et al. 2016	Global Biogeochemical cycles	DOI: 10.1002/2015GB005275	YES	GEOTRACES GA10 JC068 (UK)	12	2012	-40.0017	-16.4651	294	1.34603
Atlantic	Bratkic et al. 2016	Global Biogeochemical cycles	DOI: 10.1002/2015GB005275	YES	GEOTRACES GA10 JC068 (UK)	12	2012	-40.0017	-16.4651	196
Atlantic	Bratkic et al. 2016	Global Biogeochemical cycles	DOI: 10.1002/2015GB005275	YES	GEOTRACES GA10 JC068 (UK)	12	2012	-40.0017	-16.4651	196	1.29618
Atlantic	Bratkic et al. 2016	Global Biogeochemical cycles	DOI: 10.1002/2015GB005275	YES	GEOTRACES GA10 JC068 (UK)	12	2012	-40.0017	-16.4651	137	1.29618
Atlantic	Bratkic et al. 2016	Global Biogeochemical cycles	DOI: 10.1002/2015GB005275	YES	GEOTRACES GA10 JC068 (UK)	12	2012	-40.0017	-16.4651	136
Atlantic	Bratkic et al. 2016	Global Biogeochemical cycles	DOI: 10.1002/2015GB005275	YES	GEOTRACES GA10 JC068 (UK)	12	2012	-40.0017	-16.4651	96	1.09676
Atlantic	Bratkic et al. 2016	Global Biogeochemical cycles	DOI: 10.1002/2015GB005275	YES	GEOTRACES GA10 JC068 (UK)	12	2012	-40.0017	-16.4651	96
Atlantic	Bratkic et al. 2016	Global Biogeochemical cycles	DOI: 10.1002/2015GB005275	YES	GEOTRACES GA10 JC068 (UK)	12	2012	-40.0017	-16.4651	75	1.19647
Atlantic	Bratkic et al. 2016	Global Biogeochemical cycles	DOI: 10.1002/2015GB005275	YES	GEOTRACES GA10 JC068 (UK)	12	2012	-40.0017	-16.4651	75
Atlantic	Bratkic et al. 2016	Global Biogeochemical cycles	DOI: 10.1002/2015GB005275	YES	GEOTRACES GA10 JC068 (UK)	12	2012	-40.0017	-16.4651	56	1.04691
Atlantic	Bratkic et al. 2016	Global Biogeochemical cycles	DOI: 10.1002/2015GB005275	YES	GEOTRACES GA10 JC068 (UK)	12	2012	-40.0017	-16.4651	55
Atlantic	Bratkic et al. 2016	Global Biogeochemical cycles	DOI: 10.1002/2015GB005275	YES	GEOTRACES GA10 JC068 (UK)	12	2012	-40.0017	-16.4651	46	1.24632
Atlantic	Bratkic et al. 2016	Global Biogeochemical cycles	DOI: 10.1002/2015GB005275	YES	GEOTRACES GA10 JC068 (UK)	12	2012	-40.0017	-16.4651	46
Atlantic	Bratkic et al. 2016	Global Biogeochemical cycles	DOI: 10.1002/2015GB005275	YES	GEOTRACES GA10 JC068 (UK)	12	2012	-40.0017	-16.4651	36	1.39588
Atlantic	Bratkic et al. 2016	Global Biogeochemical cycles	DOI: 10.1002/2015GB005275	YES	GEOTRACES GA10 JC068 (UK)	12	2012	-40.0017	-16.4651	36
Atlantic	Bratkic et al. 2016	Global Biogeochemical cycles	DOI: 10.1002/2015GB005275	YES	GEOTRACES GA10 JC068 (UK)	12	2012	-40.0017	-16.4651	36
Atlantic	Bratkic et al. 2016	Global Biogeochemical cycles	DOI: 10.1002/2015GB005275	YES	GEOTRACES GA10 JC068 (UK)	12	2012	-40.0017	-16.4651	26	1.19647
Atlantic	Bratkic et al. 2016	Global Biogeochemical cycles	DOI: 10.1002/2015GB005275	YES	GEOTRACES GA10 JC068 (UK)	12	2012	-40.0017	-16.4651	25
Atlantic	Bratkic et al. 2016	Global Biogeochemical cycles	DOI: 10.1002/2015GB005275	YES	GEOTRACES GA10 JC068 (UK)	12	2012	-40.0017	-16.4651	16	1.19647
Atlantic	Bratkic et al. 2016	Global Biogeochemical cycles	DOI: 10.1002/2015GB005275	YES	GEOTRACES GA10 JC068 (UK)	12	2012	-40.0017	-16.4651	16
Atlantic	Bratkic et al. 2016	Global Biogeochemical cycles	DOI: 10.1002/2015GB005275	YES	GEOTRACES GA10 JC068 (UK)	12	2012	-40.0017	-16.4651	0	1.09676
Atlantic	Bratkic et al. 2016	Global Biogeochemical cycles	DOI: 10.1002/2015GB005275	YES	GEOTRACES GA10 JC068 (UK)	12	2012	-40.0017	-16.4651	1
Atlantic	Bratkic et al. 2016	Global Biogeochemical cycles	DOI: 10.1002/2015GB005275	YES	GEOTRACES GA10 JC068 (UK)	12	2012	-40	-16.4667	400	0.747794	0.0324044
Atlantic	Bratkic et al. 2016	Global Biogeochemical cycles	DOI: 10.1002/2015GB005275	YES	GEOTRACES GA10 JC068 (UK)	12	2012	-40	-16.4667	299	0.797647	0.0458647
Atlantic	Bratkic et al. 2016	Global Biogeochemical cycles	DOI: 10.1002/2015GB005275	YES	GEOTRACES GA10 JC068 (UK)	12	2012	-40	-16.4667	198
Atlantic	Bratkic et al. 2016	Global Biogeochemical cycles	DOI: 10.1002/2015GB005275	YES	GEOTRACES GA10 JC068 (UK)	12	2012	-40	-16.4667	197
Atlantic	Bratkic et al. 2016	Global Biogeochemical cycles	DOI: 10.1002/2015GB005275	YES	GEOTRACES GA10 JC068 (UK)	12	2012	-40	-16.4667	193
Atlantic	Bratkic et al. 2016	Global Biogeochemical cycles	DOI: 10.1002/2015GB005275	YES	GEOTRACES GA10 JC068 (UK)	12	2012	-40	-16.4667	147	0.897353	0.0373897
Atlantic	Bratkic et al. 2016	Global Biogeochemical cycles	DOI: 10.1002/2015GB005275	YES	GEOTRACES GA10 JC068 (UK)	12	2012	-40	-16.4667	99	1.39588	0.0438706
Atlantic	Bratkic et al. 2016	Global Biogeochemical cycles	DOI: 10.1002/2015GB005275	YES	GEOTRACES GA10 JC068 (UK)	12	2012	-40	-16.4667	97
Atlantic	Bratkic et al. 2016	Global Biogeochemical cycles	DOI: 10.1002/2015GB005275	YES	GEOTRACES GA10 JC068 (UK)	12	2012	-40	-16.4667	95
Atlantic	Bratkic et al. 2016	Global Biogeochemical cycles	DOI: 10.1002/2015GB005275	YES	GEOTRACES GA10 JC068 (UK)	12	2012	-40	-16.4667	73	0.797647	0.0538412
Atlantic	Bratkic et al. 2016	Global Biogeochemical cycles	DOI: 10.1002/2015GB005275	YES	GEOTRACES GA10 JC068 (UK)	12	2012	-40	-16.4667	48
Atlantic	Bratkic et al. 2016	Global Biogeochemical cycles	DOI: 10.1002/2015GB005275	YES	GEOTRACES GA10 JC068 (UK)	12	2012	-40	-16.4667	44
Atlantic	Bratkic et al. 2016	Global Biogeochemical cycles	DOI: 10.1002/2015GB005275	YES	GEOTRACES GA10 JC068 (UK)	12	2012	-40	-16.4667	42
Atlantic	Bratkic et al. 2016	Global Biogeochemical cycles	DOI: 10.1002/2015GB005275	YES	GEOTRACES GA10 JC068 (UK)	12	2012	-40	-16.4667	41	0.797647	0.0443691
Atlantic	Bratkic et al. 2016	Global Biogeochemical cycles	DOI: 10.1002/2015GB005275	YES	GEOTRACES GA10 JC068 (UK)	12	2012	-40	-16.4667	38
Atlantic	Bratkic et al. 2016	Global Biogeochemical cycles	DOI: 10.1002/2015GB005275	YES	GEOTRACES GA10 JC068 (UK)	12	2012	-40	-16.4667	34	0.897353	0.0518471
Atlantic	Bratkic et al. 2016	Global Biogeochemical cycles	DOI: 10.1002/2015GB005275	YES	GEOTRACES GA10 JC068 (UK)	12	2012	-40	-16.4667	18	1.14662	0.0468618
Atlantic	Bratkic et al. 2016	Global Biogeochemical cycles	DOI: 10.1002/2015GB005275	YES	GEOTRACES GA10 JC068 (UK)	12	2012	-40	-16.4667	16
Atlantic	Bratkic et al. 2016	Global Biogeochemical cycles	DOI: 10.1002/2015GB005275	YES	GEOTRACES GA10 JC068 (UK)	13	2012	-39.9993	-19.9324	3789
Atlantic	Bratkic et al. 2016	Global Biogeochemical cycles	DOI: 10.1002/2015GB005275	YES	GEOTRACES GA10 JC068 (UK)	13	2012	-39.9993	-19.9324	3791	2.14368
Atlantic	Bratkic et al. 2016	Global Biogeochemical cycles	DOI: 10.1002/2015GB005275	YES	GEOTRACES GA10 JC068 (UK)	13	2012	-39.9993	-19.9324	3692	1.89441
Atlantic	Bratkic et al. 2016	Global Biogeochemical cycles	DOI: 10.1002/2015GB005275	YES	GEOTRACES GA10 JC068 (UK)	13	2012	-39.9993	-19.9324	3493
Atlantic	Bratkic et al. 2016	Global Biogeochemical cycles	DOI: 10.1002/2015GB005275	YES	GEOTRACES GA10 JC068 (UK)	13	2012	-39.9993	-19.9324	3493
Atlantic	Bratkic et al. 2016	Global Biogeochemical cycles	DOI: 10.1002/2015GB005275	YES	GEOTRACES GA10 JC068 (UK)	13	2012	-39.9993	-19.9324	3244	1.64515
Atlantic	Bratkic et al. 2016	Global Biogeochemical cycles	DOI: 10.1002/2015GB005275	YES	GEOTRACES GA10 JC068 (UK)	13	2012	-39.9993	-19.9324	2994	1.74485
Atlantic	Bratkic et al. 2016	Global Biogeochemical cycles	DOI: 10.1002/2015GB005275	YES	GEOTRACES GA10 JC068 (UK)	13	2012	-39.9993	-19.9324	2993
Atlantic	Bratkic et al. 2016	Global Biogeochemical cycles	DOI: 10.1002/2015GB005275	YES	GEOTRACES GA10 JC068 (UK)	13	2012	-39.9993	-19.9324	2742	1.59529
Atlantic	Bratkic et al. 2016	Global Biogeochemical cycles	DOI: 10.1002/2015GB005275	YES	GEOTRACES GA10 JC068 (UK)	13	2012	-39.9993	-19.9324	2493
Atlantic	Bratkic et al. 2016	Global Biogeochemical cycles	DOI: 10.1002/2015GB005275	YES	GEOTRACES GA10 JC068 (UK)	13	2012	-39.9993	-19.9324	2495	1.59529
Atlantic	Bratkic et al. 2016	Global Biogeochemical cycles	DOI: 10.1002/2015GB005275	YES	GEOTRACES GA10 JC068 (UK)	13	2012	-39.9993	-19.9324	2244	1.34603
Atlantic	Bratkic et al. 2016	Global Biogeochemical cycles	DOI: 10.1002/2015GB005275	YES	GEOTRACES GA10 JC068 (UK)	13	2012	-39.9993	-19.9324	1994
Atlantic	Bratkic et al. 2016	Global Biogeochemical cycles	DOI: 10.1002/2015GB005275	YES	GEOTRACES GA10 JC068 (UK)	13	2012	-39.9993	-19.9324	1993	1.49559
Atlantic	Bratkic et al. 2016	Global Biogeochemical cycles	DOI: 10.1002/2015GB005275	YES	GEOTRACES GA10 JC068 (UK)	13	2012	-39.9993	-19.9324	1746	1.695
Atlantic	Bratkic et al. 2016	Global Biogeochemical cycles	DOI: 10.1002/2015GB005275	YES	GEOTRACES GA10 JC068 (UK)	13	2012	-39.9993	-19.9324	1494	1.49559
Atlantic	Bratkic et al. 2016	Global Biogeochemical cycles	DOI: 10.1002/2015GB005275	YES	GEOTRACES GA10 JC068 (UK)	13	2012	-39.9993	-19.9324	1247	1.54544
Atlantic	Bratkic et al. 2016	Global Biogeochemical cycles	DOI: 10.1002/2015GB005275	YES	GEOTRACES GA10 JC068 (UK)	13	2012	-39.9993	-19.9324	996	1.29618
Atlantic	Bratkic et al. 2016	Global Biogeochemical cycles	DOI: 10.1002/2015GB005275	YES	GEOTRACES GA10 JC068 (UK)	13	2012	-39.9993	-19.9324	747
Atlantic	Bratkic et al. 2016	Global Biogeochemical cycles	DOI: 10.1002/2015GB005275	YES	GEOTRACES GA10 JC068 (UK)	13	2012	-39.9993	-19.9324	498
Atlantic	Bratkic et al. 2016	Global Biogeochemical cycles	DOI: 10.1002/2015GB005275	YES	GEOTRACES GA10 JC068 (UK)	13	2012	-39.9993	-19.9324	198
Atlantic	Bratkic et al. 2016	Global Biogeochemical cycles	DOI: 10.1002/2015GB005275	YES	GEOTRACES GA10 JC068 (UK)	13	2012	-39.9993	-19.9324	122
Atlantic	Bratkic et al. 2016	Global Biogeochemical cycles	DOI: 10.1002/2015GB005275	YES	GEOTRACES GA10 JC068 (UK)	13	2012	-39.9993	-19.9324	49
Atlantic	Bratkic et al. 2016	Global Biogeochemical cycles	DOI: 10.1002/2015GB005275	YES	GEOTRACES GA10 JC068 (UK)	13	2012	-39.9993	-19.9324	4
Atlantic	Bratkic et al. 2016	Global Biogeochemical cycles	DOI: 10.1002/2015GB005275	YES	GEOTRACES GA10 JC068 (UK)	13	2012	-40.0004	-19.9302	3742
Atlantic	Bratkic et al. 2016	Global Biogeochemical cycles	DOI: 10.1002/2015GB005275	YES	GEOTRACES GA10 JC068 (UK)	13	2012	-40.0004	-19.9302	3691
Atlantic	Bratkic et al. 2016	Global Biogeochemical cycles	DOI: 10.1002/2015GB005275	YES	GEOTRACES GA10 JC068 (UK)	13	2012	-40.0004	-19.9302	3491
Atlantic	Bratkic et al. 2016	Global Biogeochemical cycles	DOI: 10.1002/2015GB005275	YES	GEOTRACES GA10 JC068 (UK)	13	2012	-40.0004	-19.9302	3242
Atlantic	Bratkic et al. 2016	Global Biogeochemical cycles	DOI: 10.1002/2015GB005275	YES	GEOTRACES GA10 JC068 (UK)	13	2012	-40.0004	-19.9302	2993
Atlantic	Bratkic et al. 2016	Global Biogeochemical cycles	DOI: 10.1002/2015GB005275	YES	GEOTRACES GA10 JC068 (UK)	13	2012	-40.0004	-19.9302	2742
Atlantic	Bratkic et al. 2016	Global Biogeochemical cycles	DOI: 10.1002/2015GB005275	YES	GEOTRACES GA10 JC068 (UK)	13	2012	-40.0004	-19.9302	2493
Atlantic	Bratkic et al. 2016	Global Biogeochemical cycles	DOI: 10.1002/2015GB005275	YES	GEOTRACES GA10 JC068 (UK)	13	2012	-40.0004	-19.9302	2245
Atlantic	Bratkic et al. 2016	Global Biogeochemical cycles	DOI: 10.1002/2015GB005275	YES	GEOTRACES GA10 JC068 (UK)	13	2012	-40.0004	-19.9302	1994
Atlantic	Bratkic et al. 2016	Global Biogeochemical cycles	DOI: 10.1002/2015GB005275	YES	GEOTRACES GA10 JC068 (UK)	13	2012	-40.0004	-19.9302	1746
Atlantic	Bratkic et al. 2016	Global Biogeochemical cycles	DOI: 10.1002/2015GB005275	YES	GEOTRACES GA10 JC068 (UK)	13	2012	-40.0004	-19.9302	1496
Atlantic	Bratkic et al. 2016	Global Biogeochemical cycles	DOI: 10.1002/2015GB005275	YES	GEOTRACES GA10 JC068 (UK)	13	2012	-40.0004	-19.9302	1246
Atlantic	Bratkic et al. 2016	Global Biogeochemical cycles	DOI: 10.1002/2015GB005275	YES	GEOTRACES GA10 JC068 (UK)	13	2012	-40.0004	-19.9302	996
Atlantic	Bratkic et al. 2016	Global Biogeochemical cycles	DOI: 10.1002/2015GB005275	YES	GEOTRACES GA10 JC068 (UK)	13	2012	-40.0004	-19.9302	747
Atlantic	Bratkic et al. 2016	Global Biogeochemical cycles	DOI: 10.1002/2015GB005275	YES	GEOTRACES GA10 JC068 (UK)	13	2012	-40.0004	-19.9302	597
Atlantic	Bratkic et al. 2016	Global Biogeochemical cycles	DOI: 10.1002/2015GB005275	YES	GEOTRACES GA10 JC068 (UK)	13	2012	-40.0004	-19.9302	498
Atlantic	Bratkic et al. 2016	Global Biogeochemical cycles	DOI: 10.1002/2015GB005275	YES	GEOTRACES GA10 JC068 (UK)	13	2012	-40.0004	-19.9302	398
Atlantic	Bratkic et al. 2016	Global Biogeochemical cycles	DOI: 10.1002/2015GB005275	YES	GEOTRACES GA10 JC068 (UK)	13	2012	-40.0004	-19.9302	299
Atlantic	Bratkic et al. 2016	Global Biogeochemical cycles	DOI: 10.1002/2015GB005275	YES	GEOTRACES GA10 JC068 (UK)	13	2012	-40.0004	-19.9302	198
Atlantic	Bratkic et al. 2016	Global Biogeochemical cycles	DOI: 10.1002/2015GB005275	YES	GEOTRACES GA10 JC068 (UK)	13	2012	-40.0004	-19.9302	98
Atlantic	Bratkic et al. 2016	Global Biogeochemical cycles	DOI: 10.1002/2015GB005275	YES	GEOTRACES GA10 JC068 (UK)	13	2012	-40.0004	-19.9302	74
Atlantic	Bratkic et al. 2016	Global Biogeochemical cycles	DOI: 10.1002/2015GB005275	YES	GEOTRACES GA10 JC068 (UK)	13	2012	-40.0004	-19.9302	42
Atlantic	Bratkic et al. 2016	Global Biogeochemical cycles	DOI: 10.1002/2015GB005275	YES	GEOTRACES GA10 JC068 (UK)	13	2012	-40.0004	-19.9302	33
Atlantic	Bratkic et al. 2016	Global Biogeochemical cycles	DOI: 10.1002/2015GB005275	YES	GEOTRACES GA10 JC068 (UK)	13	2012	-40.0004	-19.9302	18
Atlantic	Bratkic et al. 2016	Global Biogeochemical cycles	DOI: 10.1002/2015GB005275	YES	GEOTRACES GA10 JC068 (UK)	13	2012	-40.0003	-19.9303	1496
Atlantic	Bratkic et al. 2016	Global Biogeochemical cycles	DOI: 10.1002/2015GB005275	YES	GEOTRACES GA10 JC068 (UK)	13	2012	-40.0003	-19.9303	1497
Atlantic	Bratkic et al. 2016	Global Biogeochemical cycles	DOI: 10.1002/2015GB005275	YES	GEOTRACES GA10 JC068 (UK)	13	2012	-40.0003	-19.9303	1496
Atlantic	Bratkic et al. 2016	Global Biogeochemical cycles	DOI: 10.1002/2015GB005275	YES	GEOTRACES GA10 JC068 (UK)	13	2012	-40.0003	-19.9303	1495
Atlantic	Bratkic et al. 2016	Global Biogeochemical cycles	DOI: 10.1002/2015GB005275	YES	GEOTRACES GA10 JC068 (UK)	13	2012	-40.0003	-19.9303	1495
Atlantic	Bratkic et al. 2016	Global Biogeochemical cycles	DOI: 10.1002/2015GB005275	YES	GEOTRACES GA10 JC068 (UK)	13	2012	-40.0003	-19.9303	1496
Atlantic	Bratkic et al. 2016	Global Biogeochemical cycles	DOI: 10.1002/2015GB005275	YES	GEOTRACES GA10 JC068 (UK)	13	2012	-40.0003	-19.9303	1496
Atlantic	Bratkic et al. 2016	Global Biogeochemical cycles	DOI: 10.1002/2015GB005275	YES	GEOTRACES GA10 JC068 (UK)	13	2012	-40.0003	-19.9303	401	1.14662
Atlantic	Bratkic et al. 2016	Global Biogeochemical cycles	DOI: 10.1002/2015GB005275	YES	GEOTRACES GA10 JC068 (UK)	13	2012	-40.0003	-19.9303	300
Atlantic	Bratkic et al. 2016	Global Biogeochemical cycles	DOI: 10.1002/2015GB005275	YES	GEOTRACES GA10 JC068 (UK)	13	2012	-40.0003	-19.9303	199	1.39588
Atlantic	Bratkic et al. 2016	Global Biogeochemical cycles	DOI: 10.1002/2015GB005275	YES	GEOTRACES GA10 JC068 (UK)	13	2012	-40.0003	-19.9303	120	1.29618
Atlantic	Bratkic et al. 2016	Global Biogeochemical cycles	DOI: 10.1002/2015GB005275	YES	GEOTRACES GA10 JC068 (UK)	13	2012	-40.0003	-19.9303	100
Atlantic	Bratkic et al. 2016	Global Biogeochemical cycles	DOI: 10.1002/2015GB005275	YES	GEOTRACES GA10 JC068 (UK)	13	2012	-40.0003	-19.9303	100
Atlantic	Bratkic et al. 2016	Global Biogeochemical cycles	DOI: 10.1002/2015GB005275	YES	GEOTRACES GA10 JC068 (UK)	13	2012	-40.0003	-19.9303	80	0.947206
Atlantic	Bratkic et al. 2016	Global Biogeochemical cycles	DOI: 10.1002/2015GB005275	YES	GEOTRACES GA10 JC068 (UK)	13	2012	-40.0003	-19.9303	59
Atlantic	Bratkic et al. 2016	Global Biogeochemical cycles	DOI: 10.1002/2015GB005275	YES	GEOTRACES GA10 JC068 (UK)	13	2012	-40.0003	-19.9303	60	0.897353
Atlantic	Bratkic et al. 2016	Global Biogeochemical cycles	DOI: 10.1002/2015GB005275	YES	GEOTRACES GA10 JC068 (UK)	13	2012	-40.0003	-19.9303	51	1.09676
Atlantic	Bratkic et al. 2016	Global Biogeochemical cycles	DOI: 10.1002/2015GB005275	YES	GEOTRACES GA10 JC068 (UK)	13	2012	-40.0003	-19.9303	41
Atlantic	Bratkic et al. 2016	Global Biogeochemical cycles	DOI: 10.1002/2015GB005275	YES	GEOTRACES GA10 JC068 (UK)	13	2012	-40.0003	-19.9303	40	1.19647
Atlantic	Bratkic et al. 2016	Global Biogeochemical cycles	DOI: 10.1002/2015GB005275	YES	GEOTRACES GA10 JC068 (UK)	13	2012	-40.0003	-19.9303	31	1.39588
Atlantic	Bratkic et al. 2016	Global Biogeochemical cycles	DOI: 10.1002/2015GB005275	YES	GEOTRACES GA10 JC068 (UK)	13	2012	-40.0003	-19.9303	20
Atlantic	Bratkic et al. 2016	Global Biogeochemical cycles	DOI: 10.1002/2015GB005275	YES	GEOTRACES GA10 JC068 (UK)	13	2012	-40.0003	-19.9303	20	1.34603
Atlantic	Bratkic et al. 2016	Global Biogeochemical cycles	DOI: 10.1002/2015GB005275	YES	GEOTRACES GA10 JC068 (UK)	13	2012	-40.0003	-19.9303	5
Atlantic	Bratkic et al. 2016	Global Biogeochemical cycles	DOI: 10.1002/2015GB005275	YES	GEOTRACES GA10 JC068 (UK)	13	2012	-40.0003	-19.9303	5	1.14662
Atlantic	Bratkic et al. 2016	Global Biogeochemical cycles	DOI: 10.1002/2015GB005275	YES	GEOTRACES GA10 JC068 (UK)	14	2012	-40.0001	-23.8001	4151
Atlantic	Bratkic et al. 2016	Global Biogeochemical cycles	DOI: 10.1002/2015GB005275	YES	GEOTRACES GA10 JC068 (UK)	14	2012	-40.0001	-23.8001	4152	1.695
Atlantic	Bratkic et al. 2016	Global Biogeochemical cycles	DOI: 10.1002/2015GB005275	YES	GEOTRACES GA10 JC068 (UK)	14	2012	-40.0001	-23.8001	3991
Atlantic	Bratkic et al. 2016	Global Biogeochemical cycles	DOI: 10.1002/2015GB005275	YES	GEOTRACES GA10 JC068 (UK)	14	2012	-40.0001	-23.8001	3992	2.04397
Atlantic	Bratkic et al. 2016	Global Biogeochemical cycles	DOI: 10.1002/2015GB005275	YES	GEOTRACES GA10 JC068 (UK)	14	2012	-40.0001	-23.8001	3742
Atlantic	Bratkic et al. 2016	Global Biogeochemical cycles	DOI: 10.1002/2015GB005275	YES	GEOTRACES GA10 JC068 (UK)	14	2012	-40.0001	-23.8001	3493	2.19353
Atlantic	Bratkic et al. 2016	Global Biogeochemical cycles	DOI: 10.1002/2015GB005275	YES	GEOTRACES GA10 JC068 (UK)	14	2012	-40.0001	-23.8001	2992
Atlantic	Bratkic et al. 2016	Global Biogeochemical cycles	DOI: 10.1002/2015GB005275	YES	GEOTRACES GA10 JC068 (UK)	14	2012	-40.0001	-23.8001	2994	1.64515
Atlantic	Bratkic et al. 2016	Global Biogeochemical cycles	DOI: 10.1002/2015GB005275	YES	GEOTRACES GA10 JC068 (UK)	14	2012	-40.0001	-23.8001	2742
Atlantic	Bratkic et al. 2016	Global Biogeochemical cycles	DOI: 10.1002/2015GB005275	YES	GEOTRACES GA10 JC068 (UK)	14	2012	-40.0001	-23.8001	2494	1.79471
Atlantic	Bratkic et al. 2016	Global Biogeochemical cycles	DOI: 10.1002/2015GB005275	YES	GEOTRACES GA10 JC068 (UK)	14	2012	-40.0001	-23.8001	2222
Atlantic	Bratkic et al. 2016	Global Biogeochemical cycles	DOI: 10.1002/2015GB005275	YES	GEOTRACES GA10 JC068 (UK)	14	2012	-40.0001	-23.8001	1995
Atlantic	Bratkic et al. 2016	Global Biogeochemical cycles	DOI: 10.1002/2015GB005275	YES	GEOTRACES GA10 JC068 (UK)	14	2012	-40.0001	-23.8001	1993	1.64515
Atlantic	Bratkic et al. 2016	Global Biogeochemical cycles	DOI: 10.1002/2015GB005275	YES	GEOTRACES GA10 JC068 (UK)	14	2012	-40.0001	-23.8001	1744	1.44574
Atlantic	Bratkic et al. 2016	Global Biogeochemical cycles	DOI: 10.1002/2015GB005275	YES	GEOTRACES GA10 JC068 (UK)	14	2012	-40.0001	-23.8001	1494	1.695
Atlantic	Bratkic et al. 2016	Global Biogeochemical cycles	DOI: 10.1002/2015GB005275	YES	GEOTRACES GA10 JC068 (UK)	14	2012	-40.0001	-23.8001	1244	1.54544
Atlantic	Bratkic et al. 2016	Global Biogeochemical cycles	DOI: 10.1002/2015GB005275	YES	GEOTRACES GA10 JC068 (UK)	14	2012	-40.0001	-23.8001	997	1.39588
Atlantic	Bratkic et al. 2016	Global Biogeochemical cycles	DOI: 10.1002/2015GB005275	YES	GEOTRACES GA10 JC068 (UK)	14	2012	-40.0001	-23.8001	746	0.997059
Atlantic	Bratkic et al. 2016	Global Biogeochemical cycles	DOI: 10.1002/2015GB005275	YES	GEOTRACES GA10 JC068 (UK)	14	2012	-40.0001	-23.8001	497	1.34603
Atlantic	Bratkic et al. 2016	Global Biogeochemical cycles	DOI: 10.1002/2015GB005275	YES	GEOTRACES GA10 JC068 (UK)	14	2012	-40.0001	-23.8001	197
Atlantic	Bratkic et al. 2016	Global Biogeochemical cycles	DOI: 10.1002/2015GB005275	YES	GEOTRACES GA10 JC068 (UK)	14	2012	-40.0001	-23.8001	99
Atlantic	Bratkic et al. 2016	Global Biogeochemical cycles	DOI: 10.1002/2015GB005275	YES	GEOTRACES GA10 JC068 (UK)	14	2012	-40.0001	-23.8001	47
Atlantic	Bratkic et al. 2016	Global Biogeochemical cycles	DOI: 10.1002/2015GB005275	YES	GEOTRACES GA10 JC068 (UK)	14	2012	-40.0001	-23.8001	18
Atlantic	Bratkic et al. 2016	Global Biogeochemical cycles	DOI: 10.1002/2015GB005275	YES	GEOTRACES GA10 JC068 (UK)	14	2012	-40.0001	-23.8001	3
Atlantic	Bratkic et al. 2016	Global Biogeochemical cycles	DOI: 10.1002/2015GB005275	YES	GEOTRACES GA10 JC068 (UK)	14	2012	-40	-23.8	4104
Atlantic	Bratkic et al. 2016	Global Biogeochemical cycles	DOI: 10.1002/2015GB005275	YES	GEOTRACES GA10 JC068 (UK)	14	2012	-40	-23.8	4087
Atlantic	Bratkic et al. 2016	Global Biogeochemical cycles	DOI: 10.1002/2015GB005275	YES	GEOTRACES GA10 JC068 (UK)	14	2012	-40	-23.8	3989
Atlantic	Bratkic et al. 2016	Global Biogeochemical cycles	DOI: 10.1002/2015GB005275	YES	GEOTRACES GA10 JC068 (UK)	14	2012	-40	-23.8	3739
Atlantic	Bratkic et al. 2016	Global Biogeochemical cycles	DOI: 10.1002/2015GB005275	YES	GEOTRACES GA10 JC068 (UK)	14	2012	-40	-23.8	3489
Atlantic	Bratkic et al. 2016	Global Biogeochemical cycles	DOI: 10.1002/2015GB005275	YES	GEOTRACES GA10 JC068 (UK)	14	2012	-40	-23.8	3240
Atlantic	Bratkic et al. 2016	Global Biogeochemical cycles	DOI: 10.1002/2015GB005275	YES	GEOTRACES GA10 JC068 (UK)	14	2012	-40	-23.8	2991
Atlantic	Bratkic et al. 2016	Global Biogeochemical cycles	DOI: 10.1002/2015GB005275	YES	GEOTRACES GA10 JC068 (UK)	14	2012	-40	-23.8	2741
Atlantic	Bratkic et al. 2016	Global Biogeochemical cycles	DOI: 10.1002/2015GB005275	YES	GEOTRACES GA10 JC068 (UK)	14	2012	-40	-23.8	2491
Atlantic	Bratkic et al. 2016	Global Biogeochemical cycles	DOI: 10.1002/2015GB005275	YES	GEOTRACES GA10 JC068 (UK)	14	2012	-40	-23.8	2239
Atlantic	Bratkic et al. 2016	Global Biogeochemical cycles	DOI: 10.1002/2015GB005275	YES	GEOTRACES GA10 JC068 (UK)	14	2012	-40	-23.8	1992
Atlantic	Bratkic et al. 2016	Global Biogeochemical cycles	DOI: 10.1002/2015GB005275	YES	GEOTRACES GA10 JC068 (UK)	14	2012	-40	-23.8	1745
Atlantic	Bratkic et al. 2016	Global Biogeochemical cycles	DOI: 10.1002/2015GB005275	YES	GEOTRACES GA10 JC068 (UK)	14	2012	-40	-23.8	1494
Atlantic	Bratkic et al. 2016	Global Biogeochemical cycles	DOI: 10.1002/2015GB005275	YES	GEOTRACES GA10 JC068 (UK)	14	2012	-40	-23.8	1245
Atlantic	Bratkic et al. 2016	Global Biogeochemical cycles	DOI: 10.1002/2015GB005275	YES	GEOTRACES GA10 JC068 (UK)	14	2012	-40	-23.8	997
Atlantic	Bratkic et al. 2016	Global Biogeochemical cycles	DOI: 10.1002/2015GB005275	YES	GEOTRACES GA10 JC068 (UK)	14	2012	-40	-23.8	745
Atlantic	Bratkic et al. 2016	Global Biogeochemical cycles	DOI: 10.1002/2015GB005275	YES	GEOTRACES GA10 JC068 (UK)	14	2012	-40	-23.8	498
Atlantic	Bratkic et al. 2016	Global Biogeochemical cycles	DOI: 10.1002/2015GB005275	YES	GEOTRACES GA10 JC068 (UK)	14	2012	-40	-23.8	398
Atlantic	Bratkic et al. 2016	Global Biogeochemical cycles	DOI: 10.1002/2015GB005275	YES	GEOTRACES GA10 JC068 (UK)	14	2012	-40	-23.8	197
Atlantic	Bratkic et al. 2016	Global Biogeochemical cycles	DOI: 10.1002/2015GB005275	YES	GEOTRACES GA10 JC068 (UK)	14	2012	-40	-23.8	98
Atlantic	Bratkic et al. 2016	Global Biogeochemical cycles	DOI: 10.1002/2015GB005275	YES	GEOTRACES GA10 JC068 (UK)	14	2012	-40	-23.8	73
Atlantic	Bratkic et al. 2016	Global Biogeochemical cycles	DOI: 10.1002/2015GB005275	YES	GEOTRACES GA10 JC068 (UK)	14	2012	-40	-23.8	44
Atlantic	Bratkic et al. 2016	Global Biogeochemical cycles	DOI: 10.1002/2015GB005275	YES	GEOTRACES GA10 JC068 (UK)	14	2012	-40	-23.8	34
Atlantic	Bratkic et al. 2016	Global Biogeochemical cycles	DOI: 10.1002/2015GB005275	YES	GEOTRACES GA10 JC068 (UK)	14	2012	-40	-23.8	19
Atlantic	Bratkic et al. 2016	Global Biogeochemical cycles	DOI: 10.1002/2015GB005275	YES	GEOTRACES GA10 JC068 (UK)	14	2012	-40	-23.8	398	1.24632
Atlantic	Bratkic et al. 2016	Global Biogeochemical cycles	DOI: 10.1002/2015GB005275	YES	GEOTRACES GA10 JC068 (UK)	14	2012	-40	-23.8	398
Atlantic	Bratkic et al. 2016	Global Biogeochemical cycles	DOI: 10.1002/2015GB005275	YES	GEOTRACES GA10 JC068 (UK)	14	2012	-40	-23.8	298
Atlantic	Bratkic et al. 2016	Global Biogeochemical cycles	DOI: 10.1002/2015GB005275	YES	GEOTRACES GA10 JC068 (UK)	14	2012	-40	-23.8	199
Atlantic	Bratkic et al. 2016	Global Biogeochemical cycles	DOI: 10.1002/2015GB005275	YES	GEOTRACES GA10 JC068 (UK)	14	2012	-40	-23.8	199
Atlantic	Bratkic et al. 2016	Global Biogeochemical cycles	DOI: 10.1002/2015GB005275	YES	GEOTRACES GA10 JC068 (UK)	14	2012	-40	-23.8	119	2.14368
Atlantic	Bratkic et al. 2016	Global Biogeochemical cycles	DOI: 10.1002/2015GB005275	YES	GEOTRACES GA10 JC068 (UK)	14	2012	-40	-23.8	97
Atlantic	Bratkic et al. 2016	Global Biogeochemical cycles	DOI: 10.1002/2015GB005275	YES	GEOTRACES GA10 JC068 (UK)	14	2012	-40	-23.8	98	1.04691
Atlantic	Bratkic et al. 2016	Global Biogeochemical cycles	DOI: 10.1002/2015GB005275	YES	GEOTRACES GA10 JC068 (UK)	14	2012	-40	-23.8	78
Atlantic	Bratkic et al. 2016	Global Biogeochemical cycles	DOI: 10.1002/2015GB005275	YES	GEOTRACES GA10 JC068 (UK)	14	2012	-40	-23.8	78	1.09676
Atlantic	Bratkic et al. 2016	Global Biogeochemical cycles	DOI: 10.1002/2015GB005275	YES	GEOTRACES GA10 JC068 (UK)	14	2012	-40	-23.8	69
Atlantic	Bratkic et al. 2016	Global Biogeochemical cycles	DOI: 10.1002/2015GB005275	YES	GEOTRACES GA10 JC068 (UK)	14	2012	-40	-23.8	68	1.49559
Atlantic	Bratkic et al. 2016	Global Biogeochemical cycles	DOI: 10.1002/2015GB005275	YES	GEOTRACES GA10 JC068 (UK)	14	2012	-40	-23.8	48
Atlantic	Bratkic et al. 2016	Global Biogeochemical cycles	DOI: 10.1002/2015GB005275	YES	GEOTRACES GA10 JC068 (UK)	14	2012	-40	-23.8	48	1.09676
Atlantic	Bratkic et al. 2016	Global Biogeochemical cycles	DOI: 10.1002/2015GB005275	YES	GEOTRACES GA10 JC068 (UK)	14	2012	-40	-23.8	42
Atlantic	Bratkic et al. 2016	Global Biogeochemical cycles	DOI: 10.1002/2015GB005275	YES	GEOTRACES GA10 JC068 (UK)	14	2012	-40	-23.8	41	1.24632
Atlantic	Bratkic et al. 2016	Global Biogeochemical cycles	DOI: 10.1002/2015GB005275	YES	GEOTRACES GA10 JC068 (UK)	14	2012	-40	-23.8	41
Atlantic	Bratkic et al. 2016	Global Biogeochemical cycles	DOI: 10.1002/2015GB005275	YES	GEOTRACES GA10 JC068 (UK)	14	2012	-40	-23.8	33
Atlantic	Bratkic et al. 2016	Global Biogeochemical cycles	DOI: 10.1002/2015GB005275	YES	GEOTRACES GA10 JC068 (UK)	14	2012	-40	-23.8	34	1.39588
Atlantic	Bratkic et al. 2016	Global Biogeochemical cycles	DOI: 10.1002/2015GB005275	YES	GEOTRACES GA10 JC068 (UK)	14	2012	-40	-23.8	18
Atlantic	Bratkic et al. 2016	Global Biogeochemical cycles	DOI: 10.1002/2015GB005275	YES	GEOTRACES GA10 JC068 (UK)	14	2012	-40	-23.8	16	1.14662
Atlantic	Bratkic et al. 2016	Global Biogeochemical cycles	DOI: 10.1002/2015GB005275	YES	GEOTRACES GA10 JC068 (UK)	14	2012	-40	-23.8	2
Atlantic	Bratkic et al. 2016	Global Biogeochemical cycles	DOI: 10.1002/2015GB005275	YES	GEOTRACES GA10 JC068 (UK)	14	2012	-40	-23.8	1
Atlantic	Bratkic et al. 2016	Global Biogeochemical cycles	DOI: 10.1002/2015GB005275	YES	GEOTRACES GA10 JC068 (UK)	14	2012	-40	-23.8	-2
Atlantic	Bratkic et al. 2016	Global Biogeochemical cycles	DOI: 10.1002/2015GB005275	YES	GEOTRACES GA10 JC068 (UK)	15	2012	-40	-28	397
Atlantic	Bratkic et al. 2016	Global Biogeochemical cycles	DOI: 10.1002/2015GB005275	YES	GEOTRACES GA10 JC068 (UK)	15	2012	-40	-28	398	1.89441
Atlantic	Bratkic et al. 2016	Global Biogeochemical cycles	DOI: 10.1002/2015GB005275	YES	GEOTRACES GA10 JC068 (UK)	15	2012	-40	-28	297
Atlantic	Bratkic et al. 2016	Global Biogeochemical cycles	DOI: 10.1002/2015GB005275	YES	GEOTRACES GA10 JC068 (UK)	15	2012	-40	-28	298	1.64515
Atlantic	Bratkic et al. 2016	Global Biogeochemical cycles	DOI: 10.1002/2015GB005275	YES	GEOTRACES GA10 JC068 (UK)	15	2012	-40	-28	197
Atlantic	Bratkic et al. 2016	Global Biogeochemical cycles	DOI: 10.1002/2015GB005275	YES	GEOTRACES GA10 JC068 (UK)	15	2012	-40	-28	197	1.54544
Atlantic	Bratkic et al. 2016	Global Biogeochemical cycles	DOI: 10.1002/2015GB005275	YES	GEOTRACES GA10 JC068 (UK)	15	2012	-40	-28	128	1.29618
Atlantic	Bratkic et al. 2016	Global Biogeochemical cycles	DOI: 10.1002/2015GB005275	YES	GEOTRACES GA10 JC068 (UK)	15	2012	-40	-28	126
Atlantic	Bratkic et al. 2016	Global Biogeochemical cycles	DOI: 10.1002/2015GB005275	YES	GEOTRACES GA10 JC068 (UK)	15	2012	-40	-28	100
Atlantic	Bratkic et al. 2016	Global Biogeochemical cycles	DOI: 10.1002/2015GB005275	YES	GEOTRACES GA10 JC068 (UK)	15	2012	-40	-28	99
Atlantic	Bratkic et al. 2016	Global Biogeochemical cycles	DOI: 10.1002/2015GB005275	YES	GEOTRACES GA10 JC068 (UK)	15	2012	-40	-28	78
Atlantic	Bratkic et al. 2016	Global Biogeochemical cycles	DOI: 10.1002/2015GB005275	YES	GEOTRACES GA10 JC068 (UK)	15	2012	-40	-28	78	1.49559
Atlantic	Bratkic et al. 2016	Global Biogeochemical cycles	DOI: 10.1002/2015GB005275	YES	GEOTRACES GA10 JC068 (UK)	15	2012	-40	-28	68
Atlantic	Bratkic et al. 2016	Global Biogeochemical cycles	DOI: 10.1002/2015GB005275	YES	GEOTRACES GA10 JC068 (UK)	15	2012	-40	-28	69	1.59529
Atlantic	Bratkic et al. 2016	Global Biogeochemical cycles	DOI: 10.1002/2015GB005275	YES	GEOTRACES GA10 JC068 (UK)	15	2012	-40	-28	58
Atlantic	Bratkic et al. 2016	Global Biogeochemical cycles	DOI: 10.1002/2015GB005275	YES	GEOTRACES GA10 JC068 (UK)	15	2012	-40	-28	59	1.54544
Atlantic	Bratkic et al. 2016	Global Biogeochemical cycles	DOI: 10.1002/2015GB005275	YES	GEOTRACES GA10 JC068 (UK)	15	2012	-40	-28	48
Atlantic	Bratkic et al. 2016	Global Biogeochemical cycles	DOI: 10.1002/2015GB005275	YES	GEOTRACES GA10 JC068 (UK)	15	2012	-40	-28	49	1.09676
Atlantic	Bratkic et al. 2016	Global Biogeochemical cycles	DOI: 10.1002/2015GB005275	YES	GEOTRACES GA10 JC068 (UK)	15	2012	-40	-28	33
Atlantic	Bratkic et al. 2016	Global Biogeochemical cycles	DOI: 10.1002/2015GB005275	YES	GEOTRACES GA10 JC068 (UK)	15	2012	-40	-28	33
Atlantic	Bratkic et al. 2016	Global Biogeochemical cycles	DOI: 10.1002/2015GB005275	YES	GEOTRACES GA10 JC068 (UK)	15	2012	-40	-28	18
Atlantic	Bratkic et al. 2016	Global Biogeochemical cycles	DOI: 10.1002/2015GB005275	YES	GEOTRACES GA10 JC068 (UK)	15	2012	-40	-28	18	1.14662
Atlantic	Bratkic et al. 2016	Global Biogeochemical cycles	DOI: 10.1002/2015GB005275	YES	GEOTRACES GA10 JC068 (UK)	15	2012	-40	-28	3
Atlantic	Bratkic et al. 2016	Global Biogeochemical cycles	DOI: 10.1002/2015GB005275	YES	GEOTRACES GA10 JC068 (UK)	15	2012	-40	-28	4	1.59529
Atlantic	Bratkic et al. 2016	Global Biogeochemical cycles	DOI: 10.1002/2015GB005275	YES	GEOTRACES GA10 JC068 (UK)	15	2012	-40	-28	4205
Atlantic	Bratkic et al. 2016	Global Biogeochemical cycles	DOI: 10.1002/2015GB005275	YES	GEOTRACES GA10 JC068 (UK)	15	2012	-40	-28	4139
Atlantic	Bratkic et al. 2016	Global Biogeochemical cycles	DOI: 10.1002/2015GB005275	YES	GEOTRACES GA10 JC068 (UK)	15	2012	-40	-28	3989
Atlantic	Bratkic et al. 2016	Global Biogeochemical cycles	DOI: 10.1002/2015GB005275	YES	GEOTRACES GA10 JC068 (UK)	15	2012	-40	-28	3740
Atlantic	Bratkic et al. 2016	Global Biogeochemical cycles	DOI: 10.1002/2015GB005275	YES	GEOTRACES GA10 JC068 (UK)	15	2012	-40	-28	3490
Atlantic	Bratkic et al. 2016	Global Biogeochemical cycles	DOI: 10.1002/2015GB005275	YES	GEOTRACES GA10 JC068 (UK)	15	2012	-40	-28	3242
Atlantic	Bratkic et al. 2016	Global Biogeochemical cycles	DOI: 10.1002/2015GB005275	YES	GEOTRACES GA10 JC068 (UK)	15	2012	-40	-28	2991
Atlantic	Bratkic et al. 2016	Global Biogeochemical cycles	DOI: 10.1002/2015GB005275	YES	GEOTRACES GA10 JC068 (UK)	15	2012	-40	-28	2743
Atlantic	Bratkic et al. 2016	Global Biogeochemical cycles	DOI: 10.1002/2015GB005275	YES	GEOTRACES GA10 JC068 (UK)	15	2012	-40	-28	2492
Atlantic	Bratkic et al. 2016	Global Biogeochemical cycles	DOI: 10.1002/2015GB005275	YES	GEOTRACES GA10 JC068 (UK)	15	2012	-40	-28	2242
Atlantic	Bratkic et al. 2016	Global Biogeochemical cycles	DOI: 10.1002/2015GB005275	YES	GEOTRACES GA10 JC068 (UK)	15	2012	-40	-28	1994
Atlantic	Bratkic et al. 2016	Global Biogeochemical cycles	DOI: 10.1002/2015GB005275	YES	GEOTRACES GA10 JC068 (UK)	15	2012	-40	-28	1744
Atlantic	Bratkic et al. 2016	Global Biogeochemical cycles	DOI: 10.1002/2015GB005275	YES	GEOTRACES GA10 JC068 (UK)	15	2012	-40	-28	1496
Atlantic	Bratkic et al. 2016	Global Biogeochemical cycles	DOI: 10.1002/2015GB005275	YES	GEOTRACES GA10 JC068 (UK)	15	2012	-40	-28	1246
Atlantic	Bratkic et al. 2016	Global Biogeochemical cycles	DOI: 10.1002/2015GB005275	YES	GEOTRACES GA10 JC068 (UK)	15	2012	-40	-28	996
Atlantic	Bratkic et al. 2016	Global Biogeochemical cycles	DOI: 10.1002/2015GB005275	YES	GEOTRACES GA10 JC068 (UK)	15	2012	-40	-28	747
Atlantic	Bratkic et al. 2016	Global Biogeochemical cycles	DOI: 10.1002/2015GB005275	YES	GEOTRACES GA10 JC068 (UK)	15	2012	-40	-28	498
Atlantic	Bratkic et al. 2016	Global Biogeochemical cycles	DOI: 10.1002/2015GB005275	YES	GEOTRACES GA10 JC068 (UK)	15	2012	-40	-28	398
Atlantic	Bratkic et al. 2016	Global Biogeochemical cycles	DOI: 10.1002/2015GB005275	YES	GEOTRACES GA10 JC068 (UK)	15	2012	-40	-28	298
Atlantic	Bratkic et al. 2016	Global Biogeochemical cycles	DOI: 10.1002/2015GB005275	YES	GEOTRACES GA10 JC068 (UK)	15	2012	-40	-28	199
Atlantic	Bratkic et al. 2016	Global Biogeochemical cycles	DOI: 10.1002/2015GB005275	YES	GEOTRACES GA10 JC068 (UK)	15	2012	-40	-28	98
Atlantic	Bratkic et al. 2016	Global Biogeochemical cycles	DOI: 10.1002/2015GB005275	YES	GEOTRACES GA10 JC068 (UK)	15	2012	-40	-28	63
Atlantic	Bratkic et al. 2016	Global Biogeochemical cycles	DOI: 10.1002/2015GB005275	YES	GEOTRACES GA10 JC068 (UK)	15	2012	-40	-28	44
Atlantic	Bratkic et al. 2016	Global Biogeochemical cycles	DOI: 10.1002/2015GB005275	YES	GEOTRACES GA10 JC068 (UK)	15	2012	-40	-28	19
Atlantic	Bratkic et al. 2016	Global Biogeochemical cycles	DOI: 10.1002/2015GB005275	YES	GEOTRACES GA10 JC068 (UK)	15	2012	-40	-28	4204
Atlantic	Bratkic et al. 2016	Global Biogeochemical cycles	DOI: 10.1002/2015GB005275	YES	GEOTRACES GA10 JC068 (UK)	15	2012	-40	-28	4205	1.19647
Atlantic	Bratkic et al. 2016	Global Biogeochemical cycles	DOI: 10.1002/2015GB005275	YES	GEOTRACES GA10 JC068 (UK)	15	2012	-40	-28	3991
Atlantic	Bratkic et al. 2016	Global Biogeochemical cycles	DOI: 10.1002/2015GB005275	YES	GEOTRACES GA10 JC068 (UK)	15	2012	-40	-28	3991	1.49559
Atlantic	Bratkic et al. 2016	Global Biogeochemical cycles	DOI: 10.1002/2015GB005275	YES	GEOTRACES GA10 JC068 (UK)	15	2012	-40	-28	3742
Atlantic	Bratkic et al. 2016	Global Biogeochemical cycles	DOI: 10.1002/2015GB005275	YES	GEOTRACES GA10 JC068 (UK)	15	2012	-40	-28	3491	1.89441
Atlantic	Bratkic et al. 2016	Global Biogeochemical cycles	DOI: 10.1002/2015GB005275	YES	GEOTRACES GA10 JC068 (UK)	15	2012	-40	-28	3241	1.39588
Atlantic	Bratkic et al. 2016	Global Biogeochemical cycles	DOI: 10.1002/2015GB005275	YES	GEOTRACES GA10 JC068 (UK)	15	2012	-40	-28	2993
Atlantic	Bratkic et al. 2016	Global Biogeochemical cycles	DOI: 10.1002/2015GB005275	YES	GEOTRACES GA10 JC068 (UK)	15	2012	-40	-28	2491	1.64515
Atlantic	Bratkic et al. 2016	Global Biogeochemical cycles	DOI: 10.1002/2015GB005275	YES	GEOTRACES GA10 JC068 (UK)	15	2012	-40	-28	2241
Atlantic	Bratkic et al. 2016	Global Biogeochemical cycles	DOI: 10.1002/2015GB005275	YES	GEOTRACES GA10 JC068 (UK)	15	2012	-40	-28	1992	1.44574
Atlantic	Bratkic et al. 2016	Global Biogeochemical cycles	DOI: 10.1002/2015GB005275	YES	GEOTRACES GA10 JC068 (UK)	15	2012	-40	-28	1741	1.74485
Atlantic	Bratkic et al. 2016	Global Biogeochemical cycles	DOI: 10.1002/2015GB005275	YES	GEOTRACES GA10 JC068 (UK)	15	2012	-40	-28	1491
Atlantic	Bratkic et al. 2016	Global Biogeochemical cycles	DOI: 10.1002/2015GB005275	YES	GEOTRACES GA10 JC068 (UK)	15	2012	-40	-28	1491	1.84456
Atlantic	Bratkic et al. 2016	Global Biogeochemical cycles	DOI: 10.1002/2015GB005275	YES	GEOTRACES GA10 JC068 (UK)	15	2012	-40	-28	1242	1.59529
Atlantic	Bratkic et al. 2016	Global Biogeochemical cycles	DOI: 10.1002/2015GB005275	YES	GEOTRACES GA10 JC068 (UK)	15	2012	-40	-28	993
Atlantic	Bratkic et al. 2016	Global Biogeochemical cycles	DOI: 10.1002/2015GB005275	YES	GEOTRACES GA10 JC068 (UK)	15	2012	-40	-28	994	1.695
Atlantic	Bratkic et al. 2016	Global Biogeochemical cycles	DOI: 10.1002/2015GB005275	YES	GEOTRACES GA10 JC068 (UK)	15	2012	-40	-28	745	1.64515
Atlantic	Bratkic et al. 2016	Global Biogeochemical cycles	DOI: 10.1002/2015GB005275	YES	GEOTRACES GA10 JC068 (UK)	15	2012	-40	-28	496	1.39588
Atlantic	Bratkic et al. 2016	Global Biogeochemical cycles	DOI: 10.1002/2015GB005275	YES	GEOTRACES GA10 JC068 (UK)	15	2012	-40	-28	194
Atlantic	Bratkic et al. 2016	Global Biogeochemical cycles	DOI: 10.1002/2015GB005275	YES	GEOTRACES GA10 JC068 (UK)	15	2012	-40	-28	97
Atlantic	Bratkic et al. 2016	Global Biogeochemical cycles	DOI: 10.1002/2015GB005275	YES	GEOTRACES GA10 JC068 (UK)	15	2012	-40	-28	48
Atlantic	Bratkic et al. 2016	Global Biogeochemical cycles	DOI: 10.1002/2015GB005275	YES	GEOTRACES GA10 JC068 (UK)	15	2012	-40	-28	17
Atlantic	Bratkic et al. 2016	Global Biogeochemical cycles	DOI: 10.1002/2015GB005275	YES	GEOTRACES GA10 JC068 (UK)	15	2012	-40	-28	5
Atlantic	Bratkic et al. 2016	Global Biogeochemical cycles	DOI: 10.1002/2015GB005275	YES	GEOTRACES GA10 JC068 (UK)	16	2012	-39.9986	-32.4986	398
Atlantic	Bratkic et al. 2016	Global Biogeochemical cycles	DOI: 10.1002/2015GB005275	YES	GEOTRACES GA10 JC068 (UK)	16	2012	-39.9986	-32.4986	398	1.09676
Atlantic	Bratkic et al. 2016	Global Biogeochemical cycles	DOI: 10.1002/2015GB005275	YES	GEOTRACES GA10 JC068 (UK)	16	2012	-39.9986	-32.4986	299
Atlantic	Bratkic et al. 2016	Global Biogeochemical cycles	DOI: 10.1002/2015GB005275	YES	GEOTRACES GA10 JC068 (UK)	16	2012	-39.9986	-32.4986	299	1.59529
Atlantic	Bratkic et al. 2016	Global Biogeochemical cycles	DOI: 10.1002/2015GB005275	YES	GEOTRACES GA10 JC068 (UK)	16	2012	-39.9986	-32.4986	199
Atlantic	Bratkic et al. 2016	Global Biogeochemical cycles	DOI: 10.1002/2015GB005275	YES	GEOTRACES GA10 JC068 (UK)	16	2012	-39.9986	-32.4986	200	0.697941
Atlantic	Bratkic et al. 2016	Global Biogeochemical cycles	DOI: 10.1002/2015GB005275	YES	GEOTRACES GA10 JC068 (UK)	16	2012	-39.9986	-32.4986	121
Atlantic	Bratkic et al. 2016	Global Biogeochemical cycles	DOI: 10.1002/2015GB005275	YES	GEOTRACES GA10 JC068 (UK)	16	2012	-39.9986	-32.4986	119	1.19647
Atlantic	Bratkic et al. 2016	Global Biogeochemical cycles	DOI: 10.1002/2015GB005275	YES	GEOTRACES GA10 JC068 (UK)	16	2012	-39.9986	-32.4986	100
Atlantic	Bratkic et al. 2016	Global Biogeochemical cycles	DOI: 10.1002/2015GB005275	YES	GEOTRACES GA10 JC068 (UK)	16	2012	-39.9986	-32.4986	100	1.49559
Atlantic	Bratkic et al. 2016	Global Biogeochemical cycles	DOI: 10.1002/2015GB005275	YES	GEOTRACES GA10 JC068 (UK)	16	2012	-39.9986	-32.4986	75	1.14662
Atlantic	Bratkic et al. 2016	Global Biogeochemical cycles	DOI: 10.1002/2015GB005275	YES	GEOTRACES GA10 JC068 (UK)	16	2012	-39.9986	-32.4986	75
Atlantic	Bratkic et al. 2016	Global Biogeochemical cycles	DOI: 10.1002/2015GB005275	YES	GEOTRACES GA10 JC068 (UK)	16	2012	-39.9986	-32.4986	64
Atlantic	Bratkic et al. 2016	Global Biogeochemical cycles	DOI: 10.1002/2015GB005275	YES	GEOTRACES GA10 JC068 (UK)	16	2012	-39.9986	-32.4986	65	1.39588
Atlantic	Bratkic et al. 2016	Global Biogeochemical cycles	DOI: 10.1002/2015GB005275	YES	GEOTRACES GA10 JC068 (UK)	16	2012	-39.9986	-32.4986	56
Atlantic	Bratkic et al. 2016	Global Biogeochemical cycles	DOI: 10.1002/2015GB005275	YES	GEOTRACES GA10 JC068 (UK)	16	2012	-39.9986	-32.4986	56	1.34603
Atlantic	Bratkic et al. 2016	Global Biogeochemical cycles	DOI: 10.1002/2015GB005275	YES	GEOTRACES GA10 JC068 (UK)	16	2012	-39.9986	-32.4986	56
Atlantic	Bratkic et al. 2016	Global Biogeochemical cycles	DOI: 10.1002/2015GB005275	YES	GEOTRACES GA10 JC068 (UK)	16	2012	-39.9986	-32.4986	50	0.697941
Atlantic	Bratkic et al. 2016	Global Biogeochemical cycles	DOI: 10.1002/2015GB005275	YES	GEOTRACES GA10 JC068 (UK)	16	2012	-39.9986	-32.4986	49
Atlantic	Bratkic et al. 2016	Global Biogeochemical cycles	DOI: 10.1002/2015GB005275	YES	GEOTRACES GA10 JC068 (UK)	16	2012	-39.9986	-32.4986	34	1.99412
Atlantic	Bratkic et al. 2016	Global Biogeochemical cycles	DOI: 10.1002/2015GB005275	YES	GEOTRACES GA10 JC068 (UK)	16	2012	-39.9986	-32.4986	34
Atlantic	Bratkic et al. 2016	Global Biogeochemical cycles	DOI: 10.1002/2015GB005275	YES	GEOTRACES GA10 JC068 (UK)	16	2012	-39.9986	-32.4986	20	1.99412
Atlantic	Bratkic et al. 2016	Global Biogeochemical cycles	DOI: 10.1002/2015GB005275	YES	GEOTRACES GA10 JC068 (UK)	16	2012	-39.9986	-32.4986	5
Atlantic	Bratkic et al. 2016	Global Biogeochemical cycles	DOI: 10.1002/2015GB005275	YES	GEOTRACES GA10 JC068 (UK)	16	2012	-39.9986	-32.4986	5	1.89441
Atlantic	Bratkic et al. 2016	Global Biogeochemical cycles	DOI: 10.1002/2015GB005275	YES	GEOTRACES GA10 JC068 (UK)	16	2012	-39.9884	-32.4913	4820
Atlantic	Bratkic et al. 2016	Global Biogeochemical cycles	DOI: 10.1002/2015GB005275	YES	GEOTRACES GA10 JC068 (UK)	16	2012	-39.9884	-32.4913	4788
Atlantic	Bratkic et al. 2016	Global Biogeochemical cycles	DOI: 10.1002/2015GB005275	YES	GEOTRACES GA10 JC068 (UK)	16	2012	-39.9884	-32.4913	4489
Atlantic	Bratkic et al. 2016	Global Biogeochemical cycles	DOI: 10.1002/2015GB005275	YES	GEOTRACES GA10 JC068 (UK)	16	2012	-39.9884	-32.4913	3990
Atlantic	Bratkic et al. 2016	Global Biogeochemical cycles	DOI: 10.1002/2015GB005275	YES	GEOTRACES GA10 JC068 (UK)	16	2012	-39.9884	-32.4913	3491
Atlantic	Bratkic et al. 2016	Global Biogeochemical cycles	DOI: 10.1002/2015GB005275	YES	GEOTRACES GA10 JC068 (UK)	16	2012	-39.9884	-32.4913	3242
Atlantic	Bratkic et al. 2016	Global Biogeochemical cycles	DOI: 10.1002/2015GB005275	YES	GEOTRACES GA10 JC068 (UK)	16	2012	-39.9884	-32.4913	2992
Atlantic	Bratkic et al. 2016	Global Biogeochemical cycles	DOI: 10.1002/2015GB005275	YES	GEOTRACES GA10 JC068 (UK)	16	2012	-39.9884	-32.4913	2743
Atlantic	Bratkic et al. 2016	Global Biogeochemical cycles	DOI: 10.1002/2015GB005275	YES	GEOTRACES GA10 JC068 (UK)	16	2012	-39.9884	-32.4913	2493
Atlantic	Bratkic et al. 2016	Global Biogeochemical cycles	DOI: 10.1002/2015GB005275	YES	GEOTRACES GA10 JC068 (UK)	16	2012	-39.9884	-32.4913	2193
Atlantic	Bratkic et al. 2016	Global Biogeochemical cycles	DOI: 10.1002/2015GB005275	YES	GEOTRACES GA10 JC068 (UK)	16	2012	-39.9884	-32.4913	1994
Atlantic	Bratkic et al. 2016	Global Biogeochemical cycles	DOI: 10.1002/2015GB005275	YES	GEOTRACES GA10 JC068 (UK)	16	2012	-39.9884	-32.4913	1745
Atlantic	Bratkic et al. 2016	Global Biogeochemical cycles	DOI: 10.1002/2015GB005275	YES	GEOTRACES GA10 JC068 (UK)	16	2012	-39.9884	-32.4913	1495
Atlantic	Bratkic et al. 2016	Global Biogeochemical cycles	DOI: 10.1002/2015GB005275	YES	GEOTRACES GA10 JC068 (UK)	16	2012	-39.9884	-32.4913	1195
Atlantic	Bratkic et al. 2016	Global Biogeochemical cycles	DOI: 10.1002/2015GB005275	YES	GEOTRACES GA10 JC068 (UK)	16	2012	-39.9884	-32.4913	996
Atlantic	Bratkic et al. 2016	Global Biogeochemical cycles	DOI: 10.1002/2015GB005275	YES	GEOTRACES GA10 JC068 (UK)	16	2012	-39.9884	-32.4913	747
Atlantic	Bratkic et al. 2016	Global Biogeochemical cycles	DOI: 10.1002/2015GB005275	YES	GEOTRACES GA10 JC068 (UK)	16	2012	-39.9884	-32.4913	498
Atlantic	Bratkic et al. 2016	Global Biogeochemical cycles	DOI: 10.1002/2015GB005275	YES	GEOTRACES GA10 JC068 (UK)	16	2012	-39.9884	-32.4913	398
Atlantic	Bratkic et al. 2016	Global Biogeochemical cycles	DOI: 10.1002/2015GB005275	YES	GEOTRACES GA10 JC068 (UK)	16	2012	-39.9884	-32.4913	298
Atlantic	Bratkic et al. 2016	Global Biogeochemical cycles	DOI: 10.1002/2015GB005275	YES	GEOTRACES GA10 JC068 (UK)	16	2012	-39.9884	-32.4913	199
Atlantic	Bratkic et al. 2016	Global Biogeochemical cycles	DOI: 10.1002/2015GB005275	YES	GEOTRACES GA10 JC068 (UK)	16	2012	-39.9884	-32.4913	98
Atlantic	Bratkic et al. 2016	Global Biogeochemical cycles	DOI: 10.1002/2015GB005275	YES	GEOTRACES GA10 JC068 (UK)	16	2012	-39.9884	-32.4913	74
Atlantic	Bratkic et al. 2016	Global Biogeochemical cycles	DOI: 10.1002/2015GB005275	YES	GEOTRACES GA10 JC068 (UK)	16	2012	-39.9884	-32.4913	57
Atlantic	Bratkic et al. 2016	Global Biogeochemical cycles	DOI: 10.1002/2015GB005275	YES	GEOTRACES GA10 JC068 (UK)	16	2012	-39.9884	-32.4913	24
Atlantic	Bratkic et al. 2016	Global Biogeochemical cycles	DOI: 10.1002/2015GB005275	YES	GEOTRACES GA10 JC068 (UK)	16	2012	-39.9941	-32.4927	4848
Atlantic	Bratkic et al. 2016	Global Biogeochemical cycles	DOI: 10.1002/2015GB005275	YES	GEOTRACES GA10 JC068 (UK)	16	2012	-39.9941	-32.4927	4848	2.09382
Atlantic	Bratkic et al. 2016	Global Biogeochemical cycles	DOI: 10.1002/2015GB005275	YES	GEOTRACES GA10 JC068 (UK)	16	2012	-39.9941	-32.4927	4740
Atlantic	Bratkic et al. 2016	Global Biogeochemical cycles	DOI: 10.1002/2015GB005275	YES	GEOTRACES GA10 JC068 (UK)	16	2012	-39.9941	-32.4927	4488
Atlantic	Bratkic et al. 2016	Global Biogeochemical cycles	DOI: 10.1002/2015GB005275	YES	GEOTRACES GA10 JC068 (UK)	16	2012	-39.9941	-32.4927	4489	1.89441
Atlantic	Bratkic et al. 2016	Global Biogeochemical cycles	DOI: 10.1002/2015GB005275	YES	GEOTRACES GA10 JC068 (UK)	16	2012	-39.9941	-32.4927	3988
Atlantic	Bratkic et al. 2016	Global Biogeochemical cycles	DOI: 10.1002/2015GB005275	YES	GEOTRACES GA10 JC068 (UK)	16	2012	-39.9941	-32.4927	3489
Atlantic	Bratkic et al. 2016	Global Biogeochemical cycles	DOI: 10.1002/2015GB005275	YES	GEOTRACES GA10 JC068 (UK)	16	2012	-39.9941	-32.4927	3239	1.79471
Atlantic	Bratkic et al. 2016	Global Biogeochemical cycles	DOI: 10.1002/2015GB005275	YES	GEOTRACES GA10 JC068 (UK)	16	2012	-39.9941	-32.4927	2990
Atlantic	Bratkic et al. 2016	Global Biogeochemical cycles	DOI: 10.1002/2015GB005275	YES	GEOTRACES GA10 JC068 (UK)	16	2012	-39.9941	-32.4927	2739	2.09382
Atlantic	Bratkic et al. 2016	Global Biogeochemical cycles	DOI: 10.1002/2015GB005275	YES	GEOTRACES GA10 JC068 (UK)	16	2012	-39.9941	-32.4927	2488	1.99412
Atlantic	Bratkic et al. 2016	Global Biogeochemical cycles	DOI: 10.1002/2015GB005275	YES	GEOTRACES GA10 JC068 (UK)	16	2012	-39.9941	-32.4927	2138	1.84456
Atlantic	Bratkic et al. 2016	Global Biogeochemical cycles	DOI: 10.1002/2015GB005275	YES	GEOTRACES GA10 JC068 (UK)	16	2012	-39.9941	-32.4927	1990	1.04691
Atlantic	Bratkic et al. 2016	Global Biogeochemical cycles	DOI: 10.1002/2015GB005275	YES	GEOTRACES GA10 JC068 (UK)	16	2012	-39.9941	-32.4927	1739	1.54544
Atlantic	Bratkic et al. 2016	Global Biogeochemical cycles	DOI: 10.1002/2015GB005275	YES	GEOTRACES GA10 JC068 (UK)	16	2012	-39.9941	-32.4927	1491	1.54544
Atlantic	Bratkic et al. 2016	Global Biogeochemical cycles	DOI: 10.1002/2015GB005275	YES	GEOTRACES GA10 JC068 (UK)	16	2012	-39.9941	-32.4927	1241	1.24632
Atlantic	Bratkic et al. 2016	Global Biogeochemical cycles	DOI: 10.1002/2015GB005275	YES	GEOTRACES GA10 JC068 (UK)	16	2012	-39.9941	-32.4927	993
Atlantic	Bratkic et al. 2016	Global Biogeochemical cycles	DOI: 10.1002/2015GB005275	YES	GEOTRACES GA10 JC068 (UK)	16	2012	-39.9941	-32.4927	743	1.59529
Atlantic	Bratkic et al. 2016	Global Biogeochemical cycles	DOI: 10.1002/2015GB005275	YES	GEOTRACES GA10 JC068 (UK)	16	2012	-39.9941	-32.4927	494	1.29618
Atlantic	Bratkic et al. 2016	Global Biogeochemical cycles	DOI: 10.1002/2015GB005275	YES	GEOTRACES GA10 JC068 (UK)	16	2012	-39.9941	-32.4927	196
Atlantic	Bratkic et al. 2016	Global Biogeochemical cycles	DOI: 10.1002/2015GB005275	YES	GEOTRACES GA10 JC068 (UK)	16	2012	-39.9941	-32.4927	96
Atlantic	Bratkic et al. 2016	Global Biogeochemical cycles	DOI: 10.1002/2015GB005275	YES	GEOTRACES GA10 JC068 (UK)	16	2012	-39.9941	-32.4927	47
Atlantic	Bratkic et al. 2016	Global Biogeochemical cycles	DOI: 10.1002/2015GB005275	YES	GEOTRACES GA10 JC068 (UK)	16	2012	-39.9941	-32.4927	17
Atlantic	Bratkic et al. 2016	Global Biogeochemical cycles	DOI: 10.1002/2015GB005275	YES	GEOTRACES GA10 JC068 (UK)	16	2012	-39.9941	-32.4927	2
Atlantic	Bratkic et al. 2016	Global Biogeochemical cycles	DOI: 10.1002/2015GB005275	YES	GEOTRACES GA10 JC068 (UK)	17	2012	-40	-37.4167	994
Atlantic	Bratkic et al. 2016	Global Biogeochemical cycles	DOI: 10.1002/2015GB005275	YES	GEOTRACES GA10 JC068 (UK)	17	2012	-40	-37.4167	995
Atlantic	Bratkic et al. 2016	Global Biogeochemical cycles	DOI: 10.1002/2015GB005275	YES	GEOTRACES GA10 JC068 (UK)	17	2012	-40	-37.4167	746	2.04397
Atlantic	Bratkic et al. 2016	Global Biogeochemical cycles	DOI: 10.1002/2015GB005275	YES	GEOTRACES GA10 JC068 (UK)	17	2012	-40	-37.4167	745
Atlantic	Bratkic et al. 2016	Global Biogeochemical cycles	DOI: 10.1002/2015GB005275	YES	GEOTRACES GA10 JC068 (UK)	17	2012	-40	-37.4167	397	1.59529
Atlantic	Bratkic et al. 2016	Global Biogeochemical cycles	DOI: 10.1002/2015GB005275	YES	GEOTRACES GA10 JC068 (UK)	17	2012	-40	-37.4167	397
Atlantic	Bratkic et al. 2016	Global Biogeochemical cycles	DOI: 10.1002/2015GB005275	YES	GEOTRACES GA10 JC068 (UK)	17	2012	-40	-37.4167	297	3.29029
Atlantic	Bratkic et al. 2016	Global Biogeochemical cycles	DOI: 10.1002/2015GB005275	YES	GEOTRACES GA10 JC068 (UK)	17	2012	-40	-37.4167	197	1.695
Atlantic	Bratkic et al. 2016	Global Biogeochemical cycles	DOI: 10.1002/2015GB005275	YES	GEOTRACES GA10 JC068 (UK)	17	2012	-40	-37.4167	197
Atlantic	Bratkic et al. 2016	Global Biogeochemical cycles	DOI: 10.1002/2015GB005275	YES	GEOTRACES GA10 JC068 (UK)	17	2012	-40	-37.4167	98	1.24632
Atlantic	Bratkic et al. 2016	Global Biogeochemical cycles	DOI: 10.1002/2015GB005275	YES	GEOTRACES GA10 JC068 (UK)	17	2012	-40	-37.4167	97
Atlantic	Bratkic et al. 2016	Global Biogeochemical cycles	DOI: 10.1002/2015GB005275	YES	GEOTRACES GA10 JC068 (UK)	17	2012	-40	-37.4167	96
Atlantic	Bratkic et al. 2016	Global Biogeochemical cycles	DOI: 10.1002/2015GB005275	YES	GEOTRACES GA10 JC068 (UK)	17	2012	-40	-37.4167	83	1.14662
Atlantic	Bratkic et al. 2016	Global Biogeochemical cycles	DOI: 10.1002/2015GB005275	YES	GEOTRACES GA10 JC068 (UK)	17	2012	-40	-37.4167	72
Atlantic	Bratkic et al. 2016	Global Biogeochemical cycles	DOI: 10.1002/2015GB005275	YES	GEOTRACES GA10 JC068 (UK)	17	2012	-40	-37.4167	62	3.39
Atlantic	Bratkic et al. 2016	Global Biogeochemical cycles	DOI: 10.1002/2015GB005275	YES	GEOTRACES GA10 JC068 (UK)	17	2012	-40	-37.4167	61
Atlantic	Bratkic et al. 2016	Global Biogeochemical cycles	DOI: 10.1002/2015GB005275	YES	GEOTRACES GA10 JC068 (UK)	17	2012	-40	-37.4167	58	2.04397
Atlantic	Bratkic et al. 2016	Global Biogeochemical cycles	DOI: 10.1002/2015GB005275	YES	GEOTRACES GA10 JC068 (UK)	17	2012	-40	-37.4167	48	1.54544
Atlantic	Bratkic et al. 2016	Global Biogeochemical cycles	DOI: 10.1002/2015GB005275	YES	GEOTRACES GA10 JC068 (UK)	17	2012	-40	-37.4167	48
Atlantic	Bratkic et al. 2016	Global Biogeochemical cycles	DOI: 10.1002/2015GB005275	YES	GEOTRACES GA10 JC068 (UK)	17	2012	-40	-37.4167	48
Atlantic	Bratkic et al. 2016	Global Biogeochemical cycles	DOI: 10.1002/2015GB005275	YES	GEOTRACES GA10 JC068 (UK)	17	2012	-40	-37.4167	32	1.39588
Atlantic	Bratkic et al. 2016	Global Biogeochemical cycles	DOI: 10.1002/2015GB005275	YES	GEOTRACES GA10 JC068 (UK)	17	2012	-40	-37.4167	3	0.8475
Atlantic	Bratkic et al. 2016	Global Biogeochemical cycles	DOI: 10.1002/2015GB005275	YES	GEOTRACES GA10 JC068 (UK)	17	2012	-40	-37.4167	4
Atlantic	Bratkic et al. 2016	Global Biogeochemical cycles	DOI: 10.1002/2015GB005275	YES	GEOTRACES GA10 JC068 (UK)	17	2012	-40	-37.4167	4
Atlantic	Bratkic et al. 2016	Global Biogeochemical cycles	DOI: 10.1002/2015GB005275	YES	GEOTRACES GA10 JC068 (UK)	17	2012	-39.9917	-37.4167	5076
Atlantic	Bratkic et al. 2016	Global Biogeochemical cycles	DOI: 10.1002/2015GB005275	YES	GEOTRACES GA10 JC068 (UK)	17	2012	-39.9917	-37.4167	5027
Atlantic	Bratkic et al. 2016	Global Biogeochemical cycles	DOI: 10.1002/2015GB005275	YES	GEOTRACES GA10 JC068 (UK)	17	2012	-39.9917	-37.4167	4987
Atlantic	Bratkic et al. 2016	Global Biogeochemical cycles	DOI: 10.1002/2015GB005275	YES	GEOTRACES GA10 JC068 (UK)	17	2012	-39.9917	-37.4167	4737
Atlantic	Bratkic et al. 2016	Global Biogeochemical cycles	DOI: 10.1002/2015GB005275	YES	GEOTRACES GA10 JC068 (UK)	17	2012	-40	-37.4166	5103
Atlantic	Bratkic et al. 2016	Global Biogeochemical cycles	DOI: 10.1002/2015GB005275	YES	GEOTRACES GA10 JC068 (UK)	17	2012	-40	-37.4166	5103	2.69206
Atlantic	Bratkic et al. 2016	Global Biogeochemical cycles	DOI: 10.1002/2015GB005275	YES	GEOTRACES GA10 JC068 (UK)	17	2012	-40	-37.4166	4990
Atlantic	Bratkic et al. 2016	Global Biogeochemical cycles	DOI: 10.1002/2015GB005275	YES	GEOTRACES GA10 JC068 (UK)	17	2012	-40	-37.4166	4990	2.29323
Atlantic	Bratkic et al. 2016	Global Biogeochemical cycles	DOI: 10.1002/2015GB005275	YES	GEOTRACES GA10 JC068 (UK)	17	2012	-40	-37.4166	4991
Atlantic	Bratkic et al. 2016	Global Biogeochemical cycles	DOI: 10.1002/2015GB005275	YES	GEOTRACES GA10 JC068 (UK)	17	2012	-40	-37.4166	4490	1.89441
Atlantic	Bratkic et al. 2016	Global Biogeochemical cycles	DOI: 10.1002/2015GB005275	YES	GEOTRACES GA10 JC068 (UK)	17	2012	-40	-37.4166	3989
Atlantic	Bratkic et al. 2016	Global Biogeochemical cycles	DOI: 10.1002/2015GB005275	YES	GEOTRACES GA10 JC068 (UK)	17	2012	-40	-37.4166	3989
Atlantic	Bratkic et al. 2016	Global Biogeochemical cycles	DOI: 10.1002/2015GB005275	YES	GEOTRACES GA10 JC068 (UK)	17	2012	-40	-37.4166	3990
Atlantic	Bratkic et al. 2016	Global Biogeochemical cycles	DOI: 10.1002/2015GB005275	YES	GEOTRACES GA10 JC068 (UK)	17	2012	-40	-37.4166	3490	1.74485
Atlantic	Bratkic et al. 2016	Global Biogeochemical cycles	DOI: 10.1002/2015GB005275	YES	GEOTRACES GA10 JC068 (UK)	17	2012	-40	-37.4166	3240
Atlantic	Bratkic et al. 2016	Global Biogeochemical cycles	DOI: 10.1002/2015GB005275	YES	GEOTRACES GA10 JC068 (UK)	17	2012	-40	-37.4166	2990
Atlantic	Bratkic et al. 2016	Global Biogeochemical cycles	DOI: 10.1002/2015GB005275	YES	GEOTRACES GA10 JC068 (UK)	17	2012	-40	-37.4166	2991	1.79471
Atlantic	Bratkic et al. 2016	Global Biogeochemical cycles	DOI: 10.1002/2015GB005275	YES	GEOTRACES GA10 JC068 (UK)	17	2012	-40	-37.4166	2990
Atlantic	Bratkic et al. 2016	Global Biogeochemical cycles	DOI: 10.1002/2015GB005275	YES	GEOTRACES GA10 JC068 (UK)	17	2012	-40	-37.4166	2492	1.64515
Atlantic	Bratkic et al. 2016	Global Biogeochemical cycles	DOI: 10.1002/2015GB005275	YES	GEOTRACES GA10 JC068 (UK)	17	2012	-40	-37.4166	1991
Atlantic	Bratkic et al. 2016	Global Biogeochemical cycles	DOI: 10.1002/2015GB005275	YES	GEOTRACES GA10 JC068 (UK)	17	2012	-40	-37.4166	1993	1.34603
Atlantic	Bratkic et al. 2016	Global Biogeochemical cycles	DOI: 10.1002/2015GB005275	YES	GEOTRACES GA10 JC068 (UK)	17	2012	-40	-37.4166	1992
Atlantic	Bratkic et al. 2016	Global Biogeochemical cycles	DOI: 10.1002/2015GB005275	YES	GEOTRACES GA10 JC068 (UK)	17	2012	-40	-37.4166	1743	2.09382
Atlantic	Bratkic et al. 2016	Global Biogeochemical cycles	DOI: 10.1002/2015GB005275	YES	GEOTRACES GA10 JC068 (UK)	17	2012	-40	-37.4166	1493
Atlantic	Bratkic et al. 2016	Global Biogeochemical cycles	DOI: 10.1002/2015GB005275	YES	GEOTRACES GA10 JC068 (UK)	17	2012	-40	-37.4166	1492	1.34603
Atlantic	Bratkic et al. 2016	Global Biogeochemical cycles	DOI: 10.1002/2015GB005275	YES	GEOTRACES GA10 JC068 (UK)	17	2012	-40	-37.4166	1494
Atlantic	Bratkic et al. 2016	Global Biogeochemical cycles	DOI: 10.1002/2015GB005275	YES	GEOTRACES GA10 JC068 (UK)	17	2012	-40	-37.4166	1243	2.29323
Atlantic	Bratkic et al. 2016	Global Biogeochemical cycles	DOI: 10.1002/2015GB005275	YES	GEOTRACES GA10 JC068 (UK)	17	2012	-40	-37.4166	994
Atlantic	Bratkic et al. 2016	Global Biogeochemical cycles	DOI: 10.1002/2015GB005275	YES	GEOTRACES GA10 JC068 (UK)	17b	2012	-40	-38.2538	5130
Atlantic	Bratkic et al. 2016	Global Biogeochemical cycles	DOI: 10.1002/2015GB005275	YES	GEOTRACES GA10 JC068 (UK)	17b	2012	-40	-38.2538	5100
Atlantic	Bratkic et al. 2016	Global Biogeochemical cycles	DOI: 10.1002/2015GB005275	YES	GEOTRACES GA10 JC068 (UK)	17b	2012	-40	-38.2538	5000
Atlantic	Bratkic et al. 2016	Global Biogeochemical cycles	DOI: 10.1002/2015GB005275	YES	GEOTRACES GA10 JC068 (UK)	17b	2012	-40	-38.2538	4695
Atlantic	Bratkic et al. 2016	Global Biogeochemical cycles	DOI: 10.1002/2015GB005275	YES	GEOTRACES GA10 JC068 (UK)	17b	2012	-40	-38.2538	4487
Atlantic	Bratkic et al. 2016	Global Biogeochemical cycles	DOI: 10.1002/2015GB005275	YES	GEOTRACES GA10 JC068 (UK)	17b	2012	-40	-38.2538	3988
Atlantic	Bratkic et al. 2016	Global Biogeochemical cycles	DOI: 10.1002/2015GB005275	YES	GEOTRACES GA10 JC068 (UK)	17b	2012	-40	-38.2538	3488
Atlantic	Bratkic et al. 2016	Global Biogeochemical cycles	DOI: 10.1002/2015GB005275	YES	GEOTRACES GA10 JC068 (UK)	17b	2012	-40	-38.2538	3241
Atlantic	Bratkic et al. 2016	Global Biogeochemical cycles	DOI: 10.1002/2015GB005275	YES	GEOTRACES GA10 JC068 (UK)	17b	2012	-40	-38.2538	2992
Atlantic	Bratkic et al. 2016	Global Biogeochemical cycles	DOI: 10.1002/2015GB005275	YES	GEOTRACES GA10 JC068 (UK)	17b	2012	-40	-38.2538	2492
Atlantic	Bratkic et al. 2016	Global Biogeochemical cycles	DOI: 10.1002/2015GB005275	YES	GEOTRACES GA10 JC068 (UK)	17b	2012	-40	-38.2538	2243
Atlantic	Bratkic et al. 2016	Global Biogeochemical cycles	DOI: 10.1002/2015GB005275	YES	GEOTRACES GA10 JC068 (UK)	17b	2012	-40	-38.2538	1992
Atlantic	Bratkic et al. 2016	Global Biogeochemical cycles	DOI: 10.1002/2015GB005275	YES	GEOTRACES GA10 JC068 (UK)	17b	2012	-40	-38.2538	1743
Atlantic	Bratkic et al. 2016	Global Biogeochemical cycles	DOI: 10.1002/2015GB005275	YES	GEOTRACES GA10 JC068 (UK)	17b	2012	-40	-38.2538	1495
Atlantic	Bratkic et al. 2016	Global Biogeochemical cycles	DOI: 10.1002/2015GB005275	YES	GEOTRACES GA10 JC068 (UK)	17b	2012	-40	-38.2538	1245
Atlantic	Bratkic et al. 2016	Global Biogeochemical cycles	DOI: 10.1002/2015GB005275	YES	GEOTRACES GA10 JC068 (UK)	17b	2012	-40	-38.2538	996
Atlantic	Bratkic et al. 2016	Global Biogeochemical cycles	DOI: 10.1002/2015GB005275	YES	GEOTRACES GA10 JC068 (UK)	17b	2012	-40	-38.2538	746
Atlantic	Bratkic et al. 2016	Global Biogeochemical cycles	DOI: 10.1002/2015GB005275	YES	GEOTRACES GA10 JC068 (UK)	17b	2012	-40	-38.2538	496
Atlantic	Bratkic et al. 2016	Global Biogeochemical cycles	DOI: 10.1002/2015GB005275	YES	GEOTRACES GA10 JC068 (UK)	17b	2012	-40	-38.2538	397
Atlantic	Bratkic et al. 2016	Global Biogeochemical cycles	DOI: 10.1002/2015GB005275	YES	GEOTRACES GA10 JC068 (UK)	17b	2012	-40	-38.2538	348
Atlantic	Bratkic et al. 2016	Global Biogeochemical cycles	DOI: 10.1002/2015GB005275	YES	GEOTRACES GA10 JC068 (UK)	17b	2012	-40	-38.2538	198
Atlantic	Bratkic et al. 2016	Global Biogeochemical cycles	DOI: 10.1002/2015GB005275	YES	GEOTRACES GA10 JC068 (UK)	17b	2012	-40	-38.2538	98
Atlantic	Bratkic et al. 2016	Global Biogeochemical cycles	DOI: 10.1002/2015GB005275	YES	GEOTRACES GA10 JC068 (UK)	17b	2012	-40	-38.2538	66
Atlantic	Bratkic et al. 2016	Global Biogeochemical cycles	DOI: 10.1002/2015GB005275	YES	GEOTRACES GA10 JC068 (UK)	17b	2012	-40	-38.2538	23
Atlantic	Bratkic et al. 2016	Global Biogeochemical cycles	DOI: 10.1002/2015GB005275	YES	GEOTRACES GA10 JC068 (UK)	18	2012	-40.0012	-42.4158	399
Atlantic	Bratkic et al. 2016	Global Biogeochemical cycles	DOI: 10.1002/2015GB005275	YES	GEOTRACES GA10 JC068 (UK)	18	2012	-40.0012	-42.4158	399	1.54544
Atlantic	Bratkic et al. 2016	Global Biogeochemical cycles	DOI: 10.1002/2015GB005275	YES	GEOTRACES GA10 JC068 (UK)	18	2012	-40.0012	-42.4158	300
Atlantic	Bratkic et al. 2016	Global Biogeochemical cycles	DOI: 10.1002/2015GB005275	YES	GEOTRACES GA10 JC068 (UK)	18	2012	-40.0012	-42.4158	299	2.34309
Atlantic	Bratkic et al. 2016	Global Biogeochemical cycles	DOI: 10.1002/2015GB005275	YES	GEOTRACES GA10 JC068 (UK)	18	2012	-40.0012	-42.4158	200
Atlantic	Bratkic et al. 2016	Global Biogeochemical cycles	DOI: 10.1002/2015GB005275	YES	GEOTRACES GA10 JC068 (UK)	18	2012	-40.0012	-42.4158	200	0.747794
Atlantic	Bratkic et al. 2016	Global Biogeochemical cycles	DOI: 10.1002/2015GB005275	YES	GEOTRACES GA10 JC068 (UK)	18	2012	-40.0012	-42.4158	119
Atlantic	Bratkic et al. 2016	Global Biogeochemical cycles	DOI: 10.1002/2015GB005275	YES	GEOTRACES GA10 JC068 (UK)	18	2012	-40.0012	-42.4158	121	1.34603
Atlantic	Bratkic et al. 2016	Global Biogeochemical cycles	DOI: 10.1002/2015GB005275	YES	GEOTRACES GA10 JC068 (UK)	18	2012	-40.0012	-42.4158	101
Atlantic	Bratkic et al. 2016	Global Biogeochemical cycles	DOI: 10.1002/2015GB005275	YES	GEOTRACES GA10 JC068 (UK)	18	2012	-40.0012	-42.4158	100	0.897353
Atlantic	Bratkic et al. 2016	Global Biogeochemical cycles	DOI: 10.1002/2015GB005275	YES	GEOTRACES GA10 JC068 (UK)	18	2012	-40.0012	-42.4158	80
Atlantic	Bratkic et al. 2016	Global Biogeochemical cycles	DOI: 10.1002/2015GB005275	YES	GEOTRACES GA10 JC068 (UK)	18	2012	-40.0012	-42.4158	80	0.8475
Atlantic	Bratkic et al. 2016	Global Biogeochemical cycles	DOI: 10.1002/2015GB005275	YES	GEOTRACES GA10 JC068 (UK)	18	2012	-40.0012	-42.4158	65
Atlantic	Bratkic et al. 2016	Global Biogeochemical cycles	DOI: 10.1002/2015GB005275	YES	GEOTRACES GA10 JC068 (UK)	18	2012	-40.0012	-42.4158	66	1.14662
Atlantic	Bratkic et al. 2016	Global Biogeochemical cycles	DOI: 10.1002/2015GB005275	YES	GEOTRACES GA10 JC068 (UK)	18	2012	-40.0012	-42.4158	56
Atlantic	Bratkic et al. 2016	Global Biogeochemical cycles	DOI: 10.1002/2015GB005275	YES	GEOTRACES GA10 JC068 (UK)	18	2012	-40.0012	-42.4158	55	1.09676
Atlantic	Bratkic et al. 2016	Global Biogeochemical cycles	DOI: 10.1002/2015GB005275	YES	GEOTRACES GA10 JC068 (UK)	18	2012	-40.0012	-42.4158	48
Atlantic	Bratkic et al. 2016	Global Biogeochemical cycles	DOI: 10.1002/2015GB005275	YES	GEOTRACES GA10 JC068 (UK)	18	2012	-40.0012	-42.4158	48	0.947206
Atlantic	Bratkic et al. 2016	Global Biogeochemical cycles	DOI: 10.1002/2015GB005275	YES	GEOTRACES GA10 JC068 (UK)	18	2012	-40.0012	-42.4158	41
Atlantic	Bratkic et al. 2016	Global Biogeochemical cycles	DOI: 10.1002/2015GB005275	YES	GEOTRACES GA10 JC068 (UK)	18	2012	-40.0012	-42.4158	41	0.897353
Atlantic	Bratkic et al. 2016	Global Biogeochemical cycles	DOI: 10.1002/2015GB005275	YES	GEOTRACES GA10 JC068 (UK)	18	2012	-40.0012	-42.4158	20
Atlantic	Bratkic et al. 2016	Global Biogeochemical cycles	DOI: 10.1002/2015GB005275	YES	GEOTRACES GA10 JC068 (UK)	18	2012	-40.0012	-42.4158	20	0.548382
Atlantic	Bratkic et al. 2016	Global Biogeochemical cycles	DOI: 10.1002/2015GB005275	YES	GEOTRACES GA10 JC068 (UK)	18	2012	-40.0012	-42.4158	6
Atlantic	Bratkic et al. 2016	Global Biogeochemical cycles	DOI: 10.1002/2015GB005275	YES	GEOTRACES GA10 JC068 (UK)	18	2012	-40.0012	-42.4158	6	0.8475
Atlantic	Bratkic et al. 2016	Global Biogeochemical cycles	DOI: 10.1002/2015GB005275	YES	GEOTRACES GA10 JC068 (UK)	18	2012	-40	-42.4167	5127
Atlantic	Bratkic et al. 2016	Global Biogeochemical cycles	DOI: 10.1002/2015GB005275	YES	GEOTRACES GA10 JC068 (UK)	18	2012	-40	-42.4167	5103	1.29618	0.0538412
Atlantic	Bratkic et al. 2016	Global Biogeochemical cycles	DOI: 10.1002/2015GB005275	YES	GEOTRACES GA10 JC068 (UK)	18	2012	-40	-42.4167	4986	1.59529	0.0204397
Atlantic	Bratkic et al. 2016	Global Biogeochemical cycles	DOI: 10.1002/2015GB005275	YES	GEOTRACES GA10 JC068 (UK)	18	2012	-40	-42.4167	4739	0.598235	0.0433721
Atlantic	Bratkic et al. 2016	Global Biogeochemical cycles	DOI: 10.1002/2015GB005275	YES	GEOTRACES GA10 JC068 (UK)	18	2012	-40	-42.4167	4736
Atlantic	Bratkic et al. 2016	Global Biogeochemical cycles	DOI: 10.1002/2015GB005275	YES	GEOTRACES GA10 JC068 (UK)	18	2012	-40	-42.4167	4734
Atlantic	Bratkic et al. 2016	Global Biogeochemical cycles	DOI: 10.1002/2015GB005275	YES	GEOTRACES GA10 JC068 (UK)	18	2012	-40	-42.4167	4730
Atlantic	Bratkic et al. 2016	Global Biogeochemical cycles	DOI: 10.1002/2015GB005275	YES	GEOTRACES GA10 JC068 (UK)	18	2012	-40	-42.4167	4730
Atlantic	Bratkic et al. 2016	Global Biogeochemical cycles	DOI: 10.1002/2015GB005275	YES	GEOTRACES GA10 JC068 (UK)	18	2012	-40	-42.4167	4726
Atlantic	Bratkic et al. 2016	Global Biogeochemical cycles	DOI: 10.1002/2015GB005275	YES	GEOTRACES GA10 JC068 (UK)	18	2012	-40	-42.4167	4489	1.34603	0.0433721
Atlantic	Bratkic et al. 2016	Global Biogeochemical cycles	DOI: 10.1002/2015GB005275	YES	GEOTRACES GA10 JC068 (UK)	18	2012	-40	-42.4167	3989	1.74485	0.0463632
Atlantic	Bratkic et al. 2016	Global Biogeochemical cycles	DOI: 10.1002/2015GB005275	YES	GEOTRACES GA10 JC068 (UK)	18	2012	-40	-42.4167	3983
Atlantic	Bratkic et al. 2016	Global Biogeochemical cycles	DOI: 10.1002/2015GB005275	YES	GEOTRACES GA10 JC068 (UK)	18	2012	-40	-42.4167	3490	0.997059	0.0204397
Atlantic	Bratkic et al. 2016	Global Biogeochemical cycles	DOI: 10.1002/2015GB005275	YES	GEOTRACES GA10 JC068 (UK)	18	2012	-40	-42.4167	3242	0.997059	0.0533426
[truncated: 1,397 more rows]
